# Supplementary material for: Theoretical estimation of kinetic parameters for nucleophilic substitution reactions in solution: an application of a solution translational entropy model
Source: Royal Society of Chemistry journal article supplement (doi:10.1039/c5cp07803b), 2016-01-01
Supplement: c5cp07803b1.pdf [file c5cp07803b1.pdf]

Supporting Information for

**Theoretical Estimation of Kinetic Parameters for Nucleophilic Substitution Reactions in Solution:  
An Application of Solution Translational Entropy Model**

Ling-Li Han,<sup>a,b</sup> Shi-Jun Li<sup>a</sup> and De-Cai Fang<sup>\*,a</sup>

<sup>a</sup> College of Chemistry, Beijing Normal University, Beijing, 100875, China.

<sup>b</sup> Department of Chemistry and Chemical Engineering, Jining University, Qufu, 273155, Shandong, China

\* E-mail: [dcfang@bnu.edu.cn](mailto:dcfang@bnu.edu.cn)

## S1 Sackur-Tetrode equation

$$S_{trans} = R \ln \left[ \left( \frac{10^{-15}}{N_A^4 [X]} \right) \left( \frac{2\pi MRT e^{\frac{5}{3}}}{h^2} \right)^{\frac{3}{2}} \right]$$

Here,  $T/K$  is temperature;  $M/g \text{ mol}^{-1}$  is the mass of the particle;  $[X]/\text{mol L}^{-1}$  is the concentration of the particles;  $h$  is Plank's constant.

**S2** Experimental values and calculated activation enthalpies, activation entropies, and activation free energies for several SN reactions at the different calculation models displayed in **Fig. 2**.

| Reaction                                      |                                 | $\Delta E_e^\ddagger$ | $\Delta H^\ddagger$ | $\Delta S^\ddagger$ | $\Delta G^\ddagger$ |
|-----------------------------------------------|---------------------------------|-----------------------|---------------------|---------------------|---------------------|
| <b>1a+1b</b><br>(MeOH,<br>273.15 K)           | CAM-B3LYP /DZVP                 | 27.1                  | 27.9                | -35.1               | 38.4                |
|                                               | M062x/DZVP                      | 24.7                  | 26.0                | -31.9               | 35.5                |
|                                               | CAM-B3LYP +IDSCRF/DZVP          | 18.3                  | 18.9                | -19.8               | 25.1                |
|                                               | CAM-B3LYP +IDSCRF/TZVP          | 18.3                  | 18.9                | -19.4               | 25.0                |
|                                               | CAM-B3LYP +IDSCRF/6-311++g(d,p) | 18.2                  | 18.8                | -19.6               | 24.9                |
|                                               | B3LYP +IDSCRF/DZVP              | 17.0                  | 17.5                | -19.0               | 23.5                |
|                                               | M062x+IDSCRF/DZVP               | 16.3                  | 16.8                | -19.8               | 23.0                |
|                                               | $\omega$ B97x+IDSCRF/DZVP       | 19.1                  | 19.7                | -19.4               | 25.7                |
|                                               | $\omega$ B97xD+IDSCRF/DZVP      | 16.8                  | 17.4                | -19.9               | 23.6                |
|                                               | B2PLYP+IDSCRF /DZVP             | 19.0                  |                     |                     |                     |
|                                               | Exp. <sup>7</sup>               |                       | 20.3                | -19.5               | 26.4                |
| <b>1ba+2b</b><br>(MeOH ,<br>293.15 K)         | CAM-B3LYP /DZVP                 | 8.8                   | 9.8                 | -46.9               | 23.8                |
|                                               | M062x/DZVP                      | -0.1                  | 0.8                 | -47.5               | 15.0                |
|                                               | CAM-B3LYP +IDSCRF/DZVP          | 6.8                   | 7.7                 | -22.4               | 13.8                |
|                                               | CAM-B3LYP +IDSCRF/TZVP          | 8.6                   | 9.6                 | -22.3               | 15.7                |
|                                               | CAM-B3LYP +IDSCRF/6-311++g(d,p) | 7.5                   | 8.3                 | -24.3               | 15.0                |
|                                               | B3LYP +IDSCRF/DZVP              | 7.2                   | 8.1                 | -23.2               | 14.4                |
|                                               | M062x+IDSCRF/DZVP               | -1.5                  | -0.9                | -22.7               | 5.3                 |
|                                               | $\omega$ B97x+IDSCRF/DZVP       | 5.0                   | 5.7                 | -22.4               | 11.8                |
|                                               | $\omega$ B97xD+IDSCRF/DZVP      | 0.5                   | 1.4                 | -22.8               | 7.7                 |
|                                               | B2PLYP+IDSCRF /DZVP             | 13.1                  |                     |                     |                     |
|                                               | Exp. <sup>9(c)</sup>            |                       | 11.0                | -30.2               | 19.3                |
| <b>1da+2d</b><br>(H <sub>2</sub> O, 298.15 K) | CAM-B3LYP +IDSCRF/DZVP          | 3.6                   | 4.2                 | -23.1               | 11.0                |
|                                               | CAM-B3LYP +IDSCRF/TZVP          | 5.3                   | 5.9                 | -23.9               | 13.0                |
|                                               | CAM-B3LYP +IDSCRF/6-311++g(d,p) | 6.0                   | 6.7                 | -24.1               | 13.9                |

|                                               |                                |      |          |           |          |
|-----------------------------------------------|--------------------------------|------|----------|-----------|----------|
|                                               | B3LYP +IDSCRF/DZVP             | 5.8  | 6.4      | -24.5     | 13.7     |
|                                               | M062x+IDSCRF/DZVP              | -3.9 | -3.4     | -23.6     | 3.6      |
|                                               | $\omega$ B97x+IDSCRF/DZVP      | 0.01 | 0.6      | -23.8     | 7.7      |
|                                               | $\omega$ B97xD+IDSCRF/DZVP     | -1.7 | -1.0     | -24.0     | 6.2      |
|                                               | B2PLYP+IDSCRF /DZVP            | 8.0  |          |           |          |
|                                               | Exp. <sup>11</sup>             |      | 13.5±1.9 | -12.1±6.4 | 17.1±3.8 |
| <b>1da+2e</b><br>(H <sub>2</sub> O, 298.15 K) | CAM-B3LYP +IDSCRF/DZVP         | 0.9  | 1.4      | -23.3     | 8.4      |
|                                               | CAM-B3LYP +IDSCRF/TZVP         | 2.4  | 2.9      | -24.7     | 10.3     |
|                                               | CAM-B3LYP +IDSCRF/6311++g(d,p) | 3.0  | 3.6      | -24.4     | 10.8     |
|                                               | B3LYP +IDSCRF/DZVP             | 2.4  | 3.0      | -23.6     | 10.0     |
|                                               | M062x+IDSCRF/DZVP              | -3.7 | -3.2     | -24.7     | 4.2      |
|                                               | $\omega$ B97x+IDSCRF/DZVP      | -2.1 | -1.6     | -24.1     | 5.6      |
|                                               | $\omega$ B97xD+IDSCRF/DZVP     | -2.9 | -2.4     | -25.6     | 5.2      |
|                                               | B2PLYP+IDSCRF /DZVP            | 5.2  |          |           |          |
|                                               | Exp. <sup>11</sup>             |      | 10.4±0.7 | -15.4±2.3 | 15.0±1.4 |

**S3** The relative Gibbs free energies (in kcal mol<sup>-1</sup>) for **TS1s**, **IN1s**, and **TS2s** of some chosen reactions in the article. The relative Gibbs free energies of reactants is zero.

| Reactions                              | <b>TS1</b> | <b>IN1</b> | <b>TS2</b> |
|----------------------------------------|------------|------------|------------|
| <b>1da+2e</b> ··2MeOH                  | 19.3       | -7.0       | -0.4       |
| <b>1da+2d</b> ··3H <sub>2</sub> O      | 18.9       | 16.0       | 18.2       |
| <b>1da+2d</b> ··2H <sub>2</sub> O1DMSO | 17.2       | 11.3       | 15.3       |
| <b>1da+2e</b> ··3H <sub>2</sub> O      | 15.6       | 12.3       | 15.3       |
| <b>1da+2e</b> ··2H <sub>2</sub> O1DMSO | 14.7       | 9.4        | 13.7       |
| <b>1db+2d</b> ··3H <sub>2</sub> O      | 17.6       | 16.6       | 16.8       |
| <b>1db+2d</b> ··2H <sub>2</sub> O1DMSO | 15.7       | 14.4       | 14.6       |
| <b>1db+2e</b> ··3H <sub>2</sub> O      | 14.9       | 13.4       | 13.9       |
| <b>1db+2e</b> ··2H <sub>2</sub> O1DMSO | 12.7       | 11.2       | 11.5       |
| <b>1dc+2b</b> (MeCN)                   | 14.0       | —          | —          |
| <b>1dc+2c</b> (MeCN)                   | 17.2       | —          | —          |
| <b>1e+2b</b> (MeCN)                    | 21.1       | —          | —          |

**S4** Equilibrium between different complexes involved four H<sub>2</sub>O molecules of **2d** and **2e** (values in parentheses are Gibbs free energy in kcal mol<sup>-1</sup>).

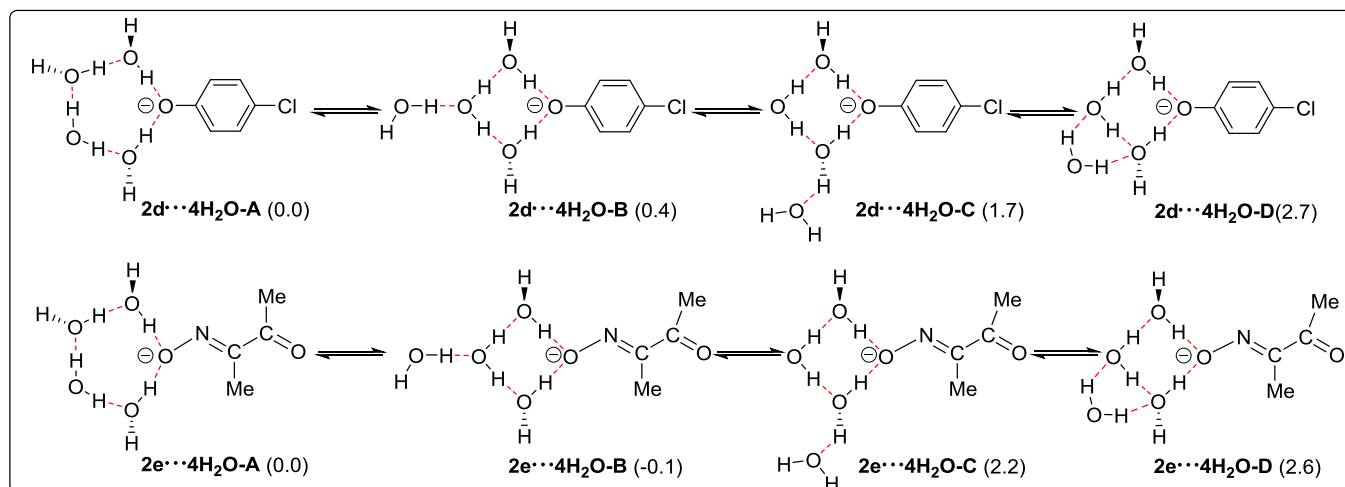

**S5** The possible complexes involved three H<sub>2</sub>O molecules and one DMSO molecule in DMSO-H<sub>2</sub>O mixture.

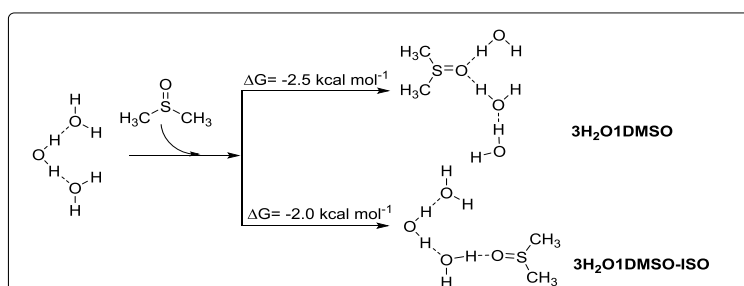

**S6** Comparisons of experimental and calculated activation enthalpies, activation entropies, and activation free energies of **1da+2d** and **1da+2e** reactions involved different explicit water molecules at the CAM-B3LYP+IDSCRF/DZVP level.

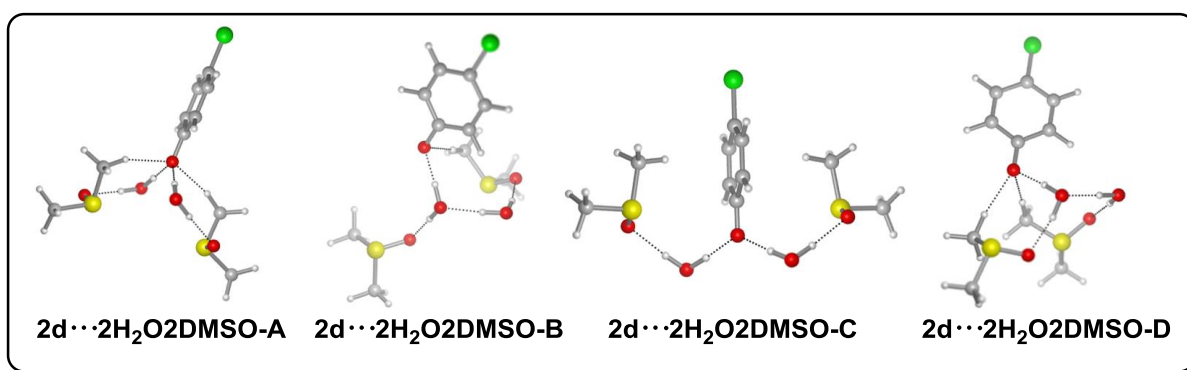

| Reactions                         | T        | $\Delta H^\ddagger(\text{exp})$ | $\Delta H^\ddagger(\text{l})$ | $\Delta S^\ddagger(\text{exp})$ | $\Delta S^\ddagger(\text{g})$ | $\Delta S^\ddagger(\text{l})$ | $\Delta G^\ddagger(\text{l})$ | $\Delta G^\ddagger(\text{exp})$ |
|-----------------------------------|----------|---------------------------------|-------------------------------|---------------------------------|-------------------------------|-------------------------------|-------------------------------|---------------------------------|
| <b>1da+2d</b> · H <sub>2</sub> O  | 298.15 K | 13.5±1.9 <sup>11</sup>          | 6.5                           | -12.1±6.4                       | -45.4                         | -24.0                         | 13.6                          | 17.1±3.8                        |
| <b>1da+2d</b> · 2H <sub>2</sub> O | 298.15 K | 13.5±1.9                        | 10.2                          | -12.1±6.4                       | -51.3                         | -27.0                         | 18.2                          | 17.1±3.8                        |

|                                          |          |                        |      |             |       |       |      |           |
|------------------------------------------|----------|------------------------|------|-------------|-------|-------|------|-----------|
| <b>1da+2d</b> ··4H <sub>2</sub> O-A      | 298.15 K | 13.5±1.9               | 16.4 | -12.1±6.4   | -51.3 | -23.2 | 23.4 | 17.1±3.8  |
| <b>1da+2d</b> ··4H <sub>2</sub> O-B      | 298.15 K | 13.5±1.9               | 15.0 | -12.1±6.4   | -43.5 | -19.0 | 20.7 | 17.1±3.8  |
| <b>1da+2e</b> ··H <sub>2</sub> O         | 298.15 K | 10.4±0.7 <sup>11</sup> | 2.8  | -15.4±2.3   | -47.1 | -24.7 | 10.2 | 15.0±1.4  |
| <b>1da+2e</b> ··2H <sub>2</sub> O        | 298.15 K | 10.4±0.7               | 6.4  | -15.4±2.3   | -42.8 | -22.9 | 13.3 | 15.0±1.4  |
| <b>1da+2e</b> ··4H <sub>2</sub> O-A      | 298.15 K | 10.4±0.7               | 13.9 | -15.4±2.3   | -50.1 | -23.6 | 20.9 | 15.0±1.4  |
| <b>1da+2e</b> ··4H <sub>2</sub> O-B      | 298.15 K | 10.4±0.7               | 12.6 | -15.4±2.3   | -42.8 | -19.3 | 18.4 | 15.0±1.4  |
| <b>1da+2d</b> ··2H <sub>2</sub> O2DMSO-A | 298.15 K | 9.6~8.2 <sup>11</sup>  | 7.4  | -18.4~-15.8 | -52.6 | -25.0 | 14.9 | 15.0~12.9 |
| <b>1da+2d</b> ··2H <sub>2</sub> O2DMSO-B | 298.15 K | 9.6~8.2                | 6.2  | -18.4~-15.8 | -51.7 | -25.1 | 13.6 | 15.0~12.9 |
| <b>1da+2d</b> ··2H <sub>2</sub> O2DMSO-C | 298.15 K | 9.6~8.2                | 6.6  | -18.4~-15.8 | -53.6 | -24.3 | 13.9 | 15.0~12.9 |
| <b>1da+2d</b> ··2H <sub>2</sub> O2DMSO-D | 298.15 K | 9.6~8.2                | 7.1  | -18.4~-15.8 | -49.3 | -23.5 | 14.1 | 15.0~12.9 |

**S7** Experimental and calculated activation enthalpies, activation entropies, and activation free energies of SN reactions at the CAM-B3LYP+IDSCRF/DZVP level displayed in **Fig. 4**.

| Reactions                          | T        | $\Delta H^\ddagger$ (exp) | $\Delta H^\ddagger$ (l) | $\Delta S^\ddagger$ (exp) | $\Delta S^\ddagger$ (g) | $\Delta S^\ddagger$ (l) | $\Delta G^\ddagger$ (g) | $\Delta G^\ddagger$ (l) | $\Delta G^\ddagger$ (exp) |
|------------------------------------|----------|---------------------------|-------------------------|---------------------------|-------------------------|-------------------------|-------------------------|-------------------------|---------------------------|
| <b>1ba+2b</b> ··MeOH               | 273.15 K | 11.0 <sup>9(c)</sup>      | 12.6                    | -30.2                     | -47.8                   | -24.4                   | 25.6                    | 19.3                    | 19.3                      |
| <b>1ba+2b</b> ··2MeOH              | 273.15 K | 11.0 <sup>9(c)</sup>      | 11.3                    | -30.2                     | -54.5                   | -28.4                   | 26.2                    | 19.1                    | 19.3                      |
| <b>1bb+2b</b> ··2MeOH              | 273.15 K | 11.2 <sup>9(c)</sup>      | 11.8                    | -29.5                     | -54.6                   | -28.7                   | 26.7                    | 19.6                    | 19.8                      |
| <b>1bc+2b</b> ··2MeOH              | 273.15 K | 11.4 <sup>9(c)</sup>      | 9.5                     | -29.3                     | -57.1                   | -31.4                   | 25.1                    | 18.1                    | 19.4                      |
| <b>1ca+2b</b> ··2MeOH <sup>b</sup> | 293.15 K | 14.8 <sup>8(c)</sup>      | 16.1                    | -29.0                     | -44.7                   | -24.1                   | 29.3                    | 23.2                    | 23.3                      |
| <b>1cb+2b</b> ··2MeOH              | 293.15 K | 15.3 <sup>8(c)</sup>      | 17.1                    | -28.0                     | -46.5                   | -25.3                   | 30.7                    | 24.5                    | 23.5                      |
| <b>1cc+2b</b> ··2MeOH              | 293.15 K | 12.9 <sup>8(b)</sup>      | 13.8                    | -30.0                     | -48.0                   | -26.7                   | 28.8                    | 21.6                    | 21.7                      |
| <b>1cd+2b</b> ··2MeOH              | 293.15 K | 14.9 <sup>8(a)</sup>      | 15.0                    | -25.0                     | -47.2                   | -25.2                   | 28.8                    | 22.3                    | 22.2                      |
| <b>1ce+2b</b> ··2MeOH              | 293.15 K | 14.4 <sup>8(d)</sup>      | 15.8                    | -27.2                     | -51.0                   | -26.7                   | 30.7                    | 23.6                    | 22.3                      |
| <b>1cf+2b</b> ··2MeOH              | 293.15 K | 11.7 <sup>8(a)</sup>      | 12.5                    | -28.5                     | -51.6                   | -28.2                   | 27.6                    | 20.7                    | 19.9                      |
| <b>1cg+2b</b> ··2MeOH              | 293.15 K | 13.8 <sup>8(a)</sup>      | 13.8                    | -30.5                     | -56.9                   | -30.7                   | 30.5                    | 22.8                    | 22.6                      |
| <b>1da+2d</b> ··3H <sub>2</sub> O  | 298.15 K | 13.5±1.9 <sup>11</sup>    | 13.2                    | -12.1±6.4                 | -44.1                   | -18.8                   | 26.4                    | 18.9                    | 17.1±3.8                  |
| <b>1da+2e</b> ··3H <sub>2</sub> O  | 298.15 K | 10.4±0.7 <sup>11</sup>    | 10.7                    | -15.4±2.3                 | -37.9                   | -16.4                   | 22.0                    | 15.6                    | 15.0±1.4                  |
| <b>1db+2d</b> ··3H <sub>2</sub> O  | 298.15 K | 12.3 <sup>10</sup>        | 10.8                    | -18.1                     | -47.7                   | -22.5                   | 25.1                    | 17.6                    | 17.7                      |
| <b>1db+2e</b> ··3H <sub>2</sub> O  | 298.15 K | 8.0 <sup>10</sup>         | 7.1                     | -23.5                     | -47.6                   | -23.6                   | 21.3                    | 14.1                    | 15.0                      |

**S8** Experimental and calculated activation enthalpies, activation entropies, and activation free energies of SN reactions at the B3LYP+IDSCRF/DZVP level displayed in **Fig. 4**

| Reactions                         | T        | $\Delta H^\ddagger(\text{exp})$ | $\Delta H^\ddagger(\text{l})$ | $\Delta S^\ddagger(\text{exp})$ | $\Delta S^\ddagger(\text{g})$ | $\Delta S^\ddagger(\text{l})$ | $\Delta G^\ddagger(\text{g})$ | $\Delta G^\ddagger(\text{l})$ | $\Delta G^\ddagger(\text{exp})$ |
|-----------------------------------|----------|---------------------------------|-------------------------------|---------------------------------|-------------------------------|-------------------------------|-------------------------------|-------------------------------|---------------------------------|
| <b>1ba+2b</b> ..2MeOH             | 273.15 K | 11.0 <sup>9(c)</sup>            | 12.4                          | -30.2                           | -53.1                         | -28.5                         | 26.9                          | 20.2                          | 19.3                            |
| <b>1bb+2b</b> ..2MeOH             | 273.15 K | 11.2 <sup>9(c)</sup>            | 12.5                          | -29.5                           | -52.1                         | -27.6                         | 26.7                          | 20.0                          | 19.8                            |
| <b>1bc+2b</b> ..2MeOH             | 273.15 K | 11.4 <sup>9(c)</sup>            | 10.9                          | -29.3                           | -59.8                         | -31.8                         | 27.2                          | 19.6                          | 19.4                            |
| <b>1ca+2b</b> ..2MeOH             | 293.15 K | 14.8 <sup>8(c)</sup>            | 15.0                          | -29.0                           | -45.1                         | -24.0                         | 28.2                          | 22.1                          | 23.3                            |
| <b>1cb+2b</b> ..2MeOH             | 293.15 K | 15.3 <sup>8(c)</sup>            | 15.7                          | -28.0                           | -46.5                         | -24.0                         | 28.8                          | 22.7                          | 23.5                            |
| <b>1cc+2b</b> ..2MeOH             | 293.15 K | 12.9 <sup>8(b)</sup>            | 13.1                          | -30.0                           | -46.7                         | -26.5                         | 26.8                          | 20.9                          | 21.7                            |
| <b>1cd+2b</b> ..2MeOH             | 293.15 K | 14.9 <sup>8(a)</sup>            | 16.3                          | -25.0                           | -48.0                         | -25.6                         | 30.3                          | 22.8                          | 22.2                            |
| <b>1ce+2b</b> ..2MeOH             | 293.15 K | 14.4 <sup>8(d)</sup>            | 16.9                          | -27.2                           | -45.8                         | -24.4                         | 30.3                          | 24.0                          | 22.3                            |
| <b>1cf+2b</b> ..2MeOH             | 293.15 K | 11.7 <sup>8(a)</sup>            | 16.1                          | -28.5                           | -54.8                         | -29.9                         | 32.2                          | 24.9                          | 19.9                            |
| <b>1cg+2b</b> ..2MeOH             | 293.15 K | 13.8 <sup>8(a)</sup>            | 13.9                          | -30.5                           | -51.3                         | -28.9                         | 29.0                          | 22.4                          | 22.6                            |
| <b>1da+2d</b> ..3H <sub>2</sub> O | 298.15 K | 13.5±1.9 <sup>11</sup>          | 16.1                          | -12.1±6.4                       | -41.9                         | -18.6                         | 28.6                          | 21.7                          | 17.1±3.8                        |
| <b>1da+2e</b> ..3H <sub>2</sub> O | 298.15 K | 10.4±0.7 <sup>11</sup>          | 12.9                          | -15.4±2.3                       | -41.6                         | -17.7                         | 25.3                          | 18.1                          | 15.0±1.4                        |
| <b>1db+2d</b> ..3H <sub>2</sub> O | 298.15 K | 12.3 <sup>10</sup>              | 13.3                          | -18.1                           | -48.3                         | -23.7                         | 27.7                          | 20.4                          | 17.7                            |
| <b>1db+2e</b> ..3H <sub>2</sub> O | 298.15 K | 8.0 <sup>10</sup>               | 9.2                           | -23.5                           | -47.1                         | -24.7                         | 23.3                          | 16.6                          | 15.0                            |

**S9** Experimental and calculated activation free energies and rate constants for all the SN reactions studied at the CAM-B3LYP+IDSCRF/DZVP level.

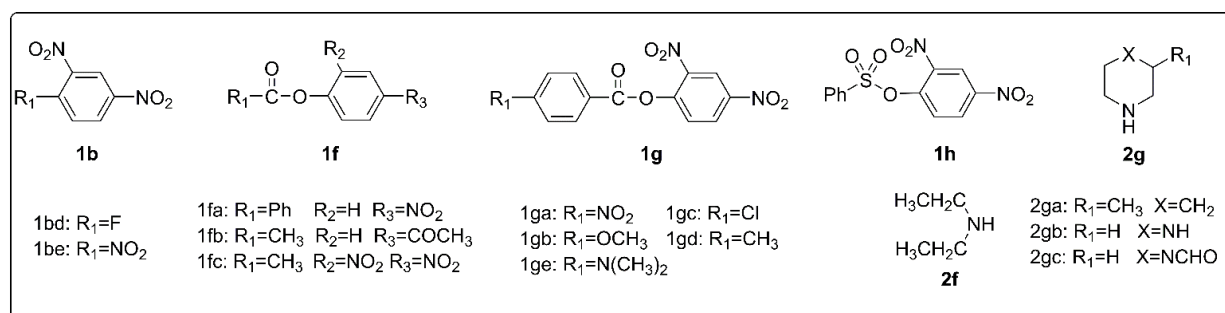

| Reaction              | T        | $\Delta G^\ddagger(\text{g})$<br>kcal mol <sup>-1</sup> | $\Delta G^\ddagger(\text{l})$<br>kcal mol <sup>-1</sup> | $\Delta G^\ddagger(\text{exp})$<br>kcal mol <sup>-1</sup> | $k(\text{g})$<br>L mol <sup>-1</sup> s <sup>-1</sup> | $k(\text{l})$<br>L mol <sup>-1</sup> s <sup>-1</sup> | $k(\text{exp})$<br>L mol <sup>-1</sup> s <sup>-1</sup> | $\ln[k(\text{g})/\text{L}]$<br>mol <sup>-1</sup> s <sup>-1</sup> | $\ln[k(\text{l})/\text{L}]$<br>mol <sup>-1</sup> s <sup>-1</sup> | $\ln[k(\text{exp})/\text{L}]$<br>mol <sup>-1</sup> s <sup>-1</sup> |
|-----------------------|----------|---------------------------------------------------------|---------------------------------------------------------|-----------------------------------------------------------|------------------------------------------------------|------------------------------------------------------|--------------------------------------------------------|------------------------------------------------------------------|------------------------------------------------------------------|--------------------------------------------------------------------|
| <b>1a+2a</b> (MeOH)   | 313.15k  | 29.5                                                    | 25.1                                                    | 26.4 <sup>7</sup>                                         | 1.7×10 <sup>-8</sup>                                 | 2.0×10 <sup>-5</sup>                                 | 2.5×10 <sup>-6</sup>                                   | -17.9                                                            | -10.8                                                            | -12.9                                                              |
| <b>1ba+2b</b> ..2MeOH | 273.15 K | 26.2                                                    | 19.1                                                    | 19.3 <sup>9(c)</sup>                                      | 6.2×10 <sup>-9</sup>                                 | 3.0×10 <sup>-3</sup>                                 | 2.0×10 <sup>-3</sup>                                   | -18.9                                                            | -5.8                                                             | -6.2                                                               |
| <b>1bb+2b</b> ..2MeOH | 273.15 K | 26.7                                                    | 19.6                                                    | 19.8 <sup>9(c)</sup>                                      | 2.5×10 <sup>-9</sup>                                 | 1.2×10 <sup>-3</sup>                                 | 2.0×10 <sup>-3</sup>                                   | -19.8                                                            | -6.7                                                             | -6.2                                                               |
| <b>1bc+2b</b> ..2MeOH | 273.15 K | 25.1                                                    | 18.1                                                    | 19.4 <sup>9(c)</sup>                                      | 4.7×10 <sup>-8</sup>                                 | 1.9×10 <sup>-2</sup>                                 | 1.4×10 <sup>-3</sup>                                   | -16.9                                                            | -4.0                                                             | -6.6                                                               |

|                                   |          |      |      |                        |                       |                      |                          |       |       |       |
|-----------------------------------|----------|------|------|------------------------|-----------------------|----------------------|--------------------------|-------|-------|-------|
| <b>1ca+2b</b> ··2MeOH             | 293.15 K | 29.3 | 23.2 | 23.3 <sup>8(c)</sup>   | $8.8 \times 10^{-10}$ | $3.1 \times 10^{-5}$ | $2.6 \times 10^{-5}$     | -20.9 | -10.4 | -10.6 |
| <b>1cb+2b</b> ··2MeOH             | 293.15 K | 30.7 | 24.5 | 23.5 <sup>8(c)</sup>   | $8.7 \times 10^{-11}$ | $3.3 \times 10^{-6}$ | $1.8 \times 10^{-5}$     | -23.3 | -12.6 | -10.9 |
| <b>1cc+2b</b> ··2MeOH             | 293.15 K | 28.8 | 21.6 | 21.7 <sup>8(b)</sup>   | $9.7 \times 10^{-9}$  | $4.8 \times 10^{-4}$ | $4.0 \times 10^{-4}$     | -18.4 | -7.6  | -7.8  |
| <b>1cd+2b</b> ··2MeOH             | 293.15 K | 28.8 | 22.3 | 22.2 <sup>8(a)</sup>   | $2.1 \times 10^{-9}$  | $1.4 \times 10^{-4}$ | $1.7 \times 10^{-4}$     | -20.0 | -8.8  | -8.7  |
| <b>1ce+2b</b> ··2MeOH             | 293.15 K | 30.7 | 23.6 | 22.3 <sup>8(d)</sup>   | $7.9 \times 10^{-11}$ | $1.6 \times 10^{-5}$ | $1.4 \times 10^{-4}$     | -23.3 | -11.1 | -8.8  |
| <b>1cf+2b</b> ··2MeOH             | 293.15 K | 27.6 | 20.7 | 19.9 <sup>8(a)</sup>   | $1.6 \times 10^{-8}$  | $2.3 \times 10^{-3}$ | $8.9 \times 10^{-3}$     | -17.9 | -6.1  | -4.7  |
| <b>1cg+2b</b> ··2MeOH             | 293.15 K | 30.5 | 22.8 | 22.6 <sup>8(a)</sup>   | $1.1 \times 10^{-10}$ | $6.1 \times 10^{-5}$ | $8.7 \times 10^{-5}$     | -22.9 | -9.7  | -9.4  |
| <b>1da+2d</b> ··3H <sub>2</sub> O | 298.15 K | 26.4 | 18.9 | 17.1±3.8 <sup>13</sup> | $2.8 \times 10^{-7}$  | $8.7 \times 10^{-2}$ | 1.5                      | -15.1 | -2.4  | 0.4   |
| <b>1da+2e</b> ··3H <sub>2</sub> O | 298.15 K | 22.0 | 15.6 | 15.0±1.4 <sup>11</sup> | $4.6 \times 10^{-4}$  | $2.3 \times 10^1$    | $4.9 \times 10^1$        | -7.7  | 3.1   | 3.9   |
| <b>1db+2d</b> ··3H <sub>2</sub> O | 298.15 K | 25.1 | 17.6 | 17.7 <sup>10</sup>     | $2.5 \times 10^{-6}$  | $7.8 \times 10^{-1}$ | $6.8 \times 10^{-1}$     | -12.9 | -0.2  | -0.4  |
| <b>1db+2e</b> ··3H <sub>2</sub> O | 298.15 K | 21.3 | 14.1 | 15.0 <sup>10</sup>     | $1.5 \times 10^{-3}$  | $2.8 \times 10^2$    | $6.6 \times 10^1$        | -6.5  | 5.6   | 4.2   |
| <b>1bb+2b</b> (MeCN)              | 298.15 K | 21.8 | 15.1 | 17.8                   | $6.5 \times 10^{-4}$  | $5.3 \times 10^1$    | $5.8 \times 10^{-19(a)}$ | -7.3  | 4.0   | -0.5  |
| <b>1ba+2c</b> (MeCN)              | 298.15 K | 23.3 | 16.4 | 19.3                   | $5.2 \times 10^{-5}$  | 5.9                  | $4.1 \times 10^{-29(a)}$ | -9.9  | 1.8   | -3.2  |
| <b>1bb+2c</b> (MeCN)              | 298.15 K | 23.8 | 16.8 | 19.3                   | $2.2 \times 10^{-5}$  | 3.0                  | $4.2 \times 10^{-29(a)}$ | -10.7 | 1.1   | -3.2  |
| <b>1dc+2b</b> (MeCN)              | 298.15 K | 20.4 | 14.0 | 14.1                   | $6.9 \times 10^{-3}$  | $3.4 \times 10^2$    | $2.9 \times 10^{12(b)}$  | -5.0  | 5.8   | 5.7   |
| <b>1dc+2c</b> (MeCN)              | 298.15 K | 23.5 | 17.2 | 15.6                   | $3.7 \times 10^{-5}$  | 1.5                  | $2.2 \times 10^{12(b)}$  | -10.2 | 0.4   | 3.1   |
| <b>1e+2b</b> (MeCN)               | 298.15 K | 28.4 | 21.1 | 23.3                   | $9.5 \times 10^{-9}$  | $2.0 \times 10^{-3}$ | $5.3 \times 10^{-52(c)}$ | -18.5 | -6.2  | -9.8  |
| <b>1ba+2b</b> ··2H <sub>2</sub> O | 298.15K  | 25.2 | 18.1 | 19.3                   | $2.1 \times 10^{-6}$  | $3.3 \times 10^{-1}$ | $4.3 \times 10^{-29(a)}$ | -13.1 | -1.1  | -3.1  |
| <b>1ba+2f</b> (MeCN)              | 298.15 K | 26.4 | 19.7 | 20.7                   | $2.8 \times 10^{-7}$  | $2.2 \times 10^{-2}$ | $4.2 \times 10^{-39(a)}$ | -15.1 | -3.8  | -5.5  |
| <b>1ba+2f</b> ··2H <sub>2</sub> O | 298.15 K | 31.4 | 24.2 | 22.2                   | $6.0 \times 10^{-11}$ | $1.1 \times 10^{-5}$ | $3.4 \times 10^{-49(a)}$ | -23.5 | -11.4 | -8.0  |
| <b>1bb+2b</b> ··2H <sub>2</sub> O | 298.15 K | 25.7 | 18.6 | 19.3                   | $9.0 \times 10^{-7}$  | $1.4 \times 10^{-1}$ | $4.7 \times 10^{-29(a)}$ | -13.9 | -2.0  | -3.1  |
| <b>1bb+2f</b> (MeCN)              | 298.15 K | 26.8 | 20.3 | 20.5                   | $1.4 \times 10^{-7}$  | $8.2 \times 10^{-3}$ | $5.6 \times 10^{-39(a)}$ | -15.8 | -4.8  | -5.2  |
| <b>1bb+2f</b> ··2H <sub>2</sub> O | 298.15 K | 32.4 | 25.1 | 22.0                   | $1.1 \times 10^{-11}$ | $2.9 \times 10^{-6}$ | $4.6 \times 10^{-49(a)}$ | -25.2 | -12.8 | -7.7  |
| <b>1bd+2b</b> ··2MeOH             | 273.15 K | 21.3 | 14.4 | 15.7                   | $5.2 \times 10^{-5}$  | $1.7 \times 10^1$    | 1.5 <sup>9(c)</sup>      | -9.9  | 2.8   | 0.4   |
| <b>1bd+2b</b> ··2H <sub>2</sub> O | 298.15 K | 21.9 | 14.4 | 16.2                   | $5.5 \times 10^{-4}$  | $1.7 \times 10^2$    | 8.2 <sup>9(a)</sup>      | -7.5  | 5.1   | 2.1   |

|                                   |          |      |      |      |                      |                      |                          |       |      |      |
|-----------------------------------|----------|------|------|------|----------------------|----------------------|--------------------------|-------|------|------|
| <b>1bd+2f</b> (MeCN)              | 298.15 K | 21.6 | 14.9 | 16.7 | $9.1 \times 10^{-4}$ | $7.4 \times 10^1$    | $3.5^{9(a)}$             | -7.0  | 4.3  | 1.3  |
| <b>1bd+2f</b> ··2H <sub>2</sub> O | 298.15 K | 26.1 | 19.0 | 17.9 | $4.6 \times 10^{-7}$ | $7.3 \times 10^{-2}$ | $5.0 \times 10^{-19(a)}$ | -14.6 | -2.6 | -0.7 |
| <b>1be+2b</b> ··2MeOH             | 273.15 K | 22.8 | 15.2 | 16.4 | $3.3 \times 10^{-6}$ | 3.9                  | $4.0 \times 10^{-19(c)}$ | -12.6 | 1.4  | -0.9 |
| <b>1fa+2d</b> ··3H <sub>2</sub> O | 298.15 K | 27.2 | 20.0 | 18.3 | $7.2 \times 10^{-8}$ | $1.3 \times 10^{-2}$ | $2.5 \times 10^{-16(b)}$ | -16.5 | -4.3 | -1.4 |
| <b>1fa+2e</b> ··3H <sub>2</sub> O | 298.15 K | 24.1 | 17.0 | 15.6 | $1.3 \times 10^{-5}$ | 2.1                  | $2.3 \times 10^{16(b)}$  | -11.2 | 0.7  | 3.1  |
| <b>1fb+2d</b> ··3H <sub>2</sub> O | 298.15 K | 27.1 | 20.4 | 18.5 | $8.5 \times 10^{-8}$ | $6.9 \times 10^{-3}$ | $1.7 \times 10^{-16(c)}$ | -16.3 | -5.0 | -1.8 |
| <b>1fb+2e</b> ··3H <sub>2</sub> O | 298.15 K | 23.0 | 16.7 | 15.6 | $8.6 \times 10^{-5}$ | 3.6                  | $2.4 \times 10^{16(c)}$  | -9.4  | 1.3  | 3.2  |
| <b>1fc+2d</b> ··3H <sub>2</sub> O | 298.15 K | 22.1 | 15.6 | 16.0 | $3.9 \times 10^{-4}$ | $2.3 \times 10^1$    | $1.2 \times 10^{16(c)}$  | -7.9  | 3.1  | 2.5  |
| <b>1fc+2e</b> ··3H <sub>2</sub> O | 298.15 K | 19.2 | 12.9 | 13.6 | $5.2 \times 10^{-2}$ | $2.2 \times 10^3$    | $6.2 \times 10^{26(c)}$  | -3.0  | 7.7  | 6.4  |
| <b>1ga+2b</b> (MeCN)              | 298.15 K | 19.5 | 12.9 | 12.7 | $3.0 \times 10^{-2}$ | $2.2 \times 10^3$    | $3.2 \times 10^{12(b)}$  | -3.4  | 7.7  | 8.0  |
| <b>1ga+2c</b> (MeCN)              | 298.15 K | 22.8 | 15.6 | 14.6 | $1.2 \times 10^{-4}$ | $2.3 \times 10^1$    | $1.3 \times 10^{12(b)}$  | -9.0  | 3.1  | 4.9  |
| <b>1gb+2b</b> (MeCN)              | 298.15 K | 21.3 | 15.2 | 14.9 | $1.5 \times 10^{-3}$ | $4.5 \times 10^1$    | $6.9 \times 10^{12(b)}$  | -6.5  | 3.8  | 4.2  |
| <b>1gb+2c</b> (MeCN)              | 298.15 K | 24.2 | 18.0 | 16.4 | $1.1 \times 10^{-5}$ | $4 \times 10^{-1}$   | $5.7^{12(b)}$            | -11.4 | -0.9 | 1.7  |
| <b>1gc+2b</b> (MeCN)              | 298.15 K | 19.8 | 13.8 | 13.7 | $1.9 \times 10^{-2}$ | $4.4 \times 10^2$    | $5.2 \times 10^{12(b)}$  | -4.0  | 6.1  | 6.2  |
| <b>1gc+2c</b> (MeCN)              | 298.15 K | 23.9 | 17.4 | 15.3 | $1.9 \times 10^{-5}$ | 1.1                  | $3.6 \times 10^{12(b)}$  | -10.9 | 0.1  | 3.6  |
| <b>1gd+2b</b> (MeCN)              | 298.15 K | 20.2 | 14.3 | 14.4 | $9.7 \times 10^{-3}$ | $2.0 \times 10^2$    | $1.6 \times 10^{12(b)}$  | -4.6  | 5.3  | 5.1  |
| <b>1gd+2c</b> (MeCN)              | 298.15 K | 23.7 | 17.4 | 16.0 | $2.6 \times 10^{-5}$ | 1.1                  | $1.3 \times 10^{12(b)}$  | -10.5 | 0.1  | 2.5  |
| <b>1ge+2b</b> (MeCN)              | 298.15 K | 22.4 | 16.6 | 16.2 | $2.4 \times 10^{-4}$ | 4.2                  | $9.0^{12(b)}$            | -8.3  | 1.4  | 2.2  |
| <b>1ge+2c</b> (MeCN)              | 298.15 K | 25.3 | 19.3 | 17.6 | $1.8 \times 10^{-6}$ | $4.4 \times 10^{-2}$ | $8.3 \times 10^{-12(b)}$ | -13.2 | -3.1 | -0.2 |
| <b>1h+2c</b> (MeCN)               | 298.15 K | 21.4 | 14.9 | 17.4 | $1.3 \times 10^{-3}$ | $7.4 \times 10^1$    | $1.0^{12(c)}$            | -6.7  | 4.3  | 9.9  |
| <b>1h+2ga</b> (MeCN)              | 298.15 K | 19.6 | 13.2 | 15.8 | $2.7 \times 10^{-2}$ | $1.3 \times 10^3$    | $1.5 \times 10^{12(c)}$  | -3.6  | 7.2  | 2.7  |
| <b>1h+2gb</b> (MeCN)              | 298.15 K | 19.5 | 12.8 | 15.8 | $3.2 \times 10^{-2}$ | $2.5 \times 10^3$    | $1.6 \times 10^{12(c)}$  | -3.4  | 7.8  | 2.8  |
| <b>1h+2gc</b> (MeCN)              | 298.15 K | 22.6 | 16.7 | 17.2 | $1.7 \times 10^{-4}$ | 3.5                  | $1.6^{12(c)}$            | -8.7  | 1.3  | 0.5  |

**S10** The optimized geometries for the transition states and minima of the reactions studied in **Fig.1** and **Fig.4**, obtained with CAM-B3LYP+IDSCRF/DZVP.



| Species                          | Cartesian coordinates |          |          | Species  | Cartesian coordinates           |   |          |          |          |
|----------------------------------|-----------------------|----------|----------|----------|---------------------------------|---|----------|----------|----------|
| <b>1a</b><br>(MeOH)              | C                     | -1.15563 | 0.78878  | 0.00001  | <b>2a</b><br>(MeOH)             | C | -0.22708 | -1.11020 | -0.00000 |
|                                  | C                     | 0.02410  | -0.16428 | 0.00001  |                                 | C | -1.50307 | -0.60655 | -0.00003 |
|                                  | H                     | -1.18214 | 1.41712  | 0.88929  |                                 | C | -0.19268 | 1.08452  | 0.00003  |
|                                  | C                     | 1.35048  | 0.60178  | 0.00000  |                                 | N | 0.60613  | -0.01509 | 0.00006  |
|                                  | H                     | -0.02958 | -0.81329 | 0.88006  |                                 | H | 0.15502  | -2.12275 | -0.00001 |
|                                  | H                     | -0.02959 | -0.81330 | -0.88004 |                                 | H | -2.43574 | -1.15735 | -0.00004 |
|                                  | H                     | 1.39468  | 1.25774  | -0.87844 |                                 | H | 0.21538  | 2.08933  | 0.00006  |
|                                  | H                     | 1.39468  | 1.25774  | 0.87843  |                                 | C | 2.05933  | -0.03285 | -0.00004 |
|                                  | C                     | 2.56563  | -0.32598 | 0.00000  |                                 | H | 2.42625  | 0.99407  | 0.00074  |
|                                  | C                     | 3.89682  | 0.42521  | -0.00001 |                                 | H | 2.43631  | -0.54149 | 0.88990  |
|                                  | H                     | 2.52058  | -0.98338 | -0.87776 |                                 | H | 2.43626  | -0.54013 | -0.89078 |
|                                  | H                     | 2.52059  | -0.98336 | 0.87778  |                                 | N | -1.47315 | 0.77046  | -0.00001 |
|                                  | C                     | 5.10688  | -0.50779 | 0.00000  |                                 |   |          |          |          |
|                                  | H                     | 3.94115  | 1.08226  | -0.87709 |                                 |   |          |          |          |
|                                  | H                     | 3.94116  | 1.08229  | 0.87704  |                                 |   |          |          |          |
|                                  | H                     | 6.04552  | 0.05469  | -0.00002 |                                 |   |          |          |          |
|                                  | H                     | 5.10678  | -1.15488 | 0.88349  |                                 |   |          |          |          |
|                                  | H                     | 5.10677  | -1.15492 | -0.88346 |                                 |   |          |          |          |
|                                  | H                     | -1.18215 | 1.41710  | -0.88929 |                                 |   |          |          |          |
|                                  | Br                    | -2.87848 | -0.17735 | 0.00003  |                                 |   |          |          |          |
| <b>TS<sub>aa</sub></b><br>(MeOH) | C                     | 0.02962  | -1.15837 | -0.26849 | <b>P<sub>aa</sub></b><br>(MeOH) | C | -0.64638 | -0.62648 | 1.37036  |
|                                  | C                     | -0.81201 | -0.05743 | -0.85395 |                                 | C | -1.08997 | 0.82924  | 1.25538  |
|                                  | H                     | 0.50310  | -1.88983 | -0.90356 |                                 | H | -1.49528 | -1.28260 | 1.57407  |
|                                  | C                     | -1.35372 | 0.91358  | 0.19048  |                                 | C | -2.16464 | 1.08193  | 0.19904  |
|                                  | H                     | -0.20592 | 0.47849  | -1.59070 |                                 | H | -1.46737 | 1.11887  | 2.24250  |
|                                  | H                     | -1.63022 | -0.51320 | -1.41499 |                                 | H | -0.21368 | 1.45894  | 1.06262  |
|                                  | H                     | -1.94880 | 0.35241  | 0.92033  |                                 | H | -1.78545 | 0.81002  | -0.79360 |
|                                  | H                     | -0.51315 | 1.35589  | 0.73900  |                                 | H | -3.02542 | 0.42889  | 0.39305  |
|                                  | C                     | -2.20572 | 2.02450  | -0.42089 |                                 | C | -2.62954 | 2.53793  | 0.17139  |
|                                  | C                     | -2.75073 | 3.00598  | 0.61629  |                                 | C | -3.70264 | 2.80734  | -0.88307 |
|                                  | H                     | -3.04400 | 1.57851  | -0.97190 |                                 | H | -1.76704 | 3.19090  | -0.01413 |
|                                  | H                     | -1.61120 | 2.57526  | -1.16174 |                                 | H | -3.01602 | 2.81429  | 1.16082  |
|                                  | C                     | -3.60343 | 4.11342  | -0.00102 |                                 | C | -4.16466 | 4.26355  | -0.90281 |
|                                  | H                     | -3.34464 | 2.45620  | 1.35657  |                                 | H | -3.31515 | 2.53272  | -1.87171 |
|                                  | H                     | -1.91330 | 3.45235  | 1.16638  |                                 | H | -4.56316 | 2.15275  | -0.69856 |
|                                  | H                     | -3.98021 | 4.80110  | 0.76231  |                                 | H | -4.93181 | 4.42896  | -1.66534 |
|                                  | H                     | -3.02573 | 4.70110  | -0.72236 |                                 | H | -4.58749 | 4.55684  | 0.06386  |
|                                  | H                     | -4.46753 | 3.69784  | -0.53015 |                                 | H | -3.33046 | 4.93969  | -1.11764 |
|                                  | H                     | 0.21804  | -1.22015 | 0.79045  |                                 | H | 0.07221  | -0.75037 | 2.18308  |

|                      |                              |                             |                               |
|----------------------|------------------------------|-----------------------------|-------------------------------|
|                      | Br -1.72240 -2.87727 0.18629 |                             | Br 4.25586 0.63305 0.84667    |
|                      | C 3.80898 0.87568 -0.98538   |                             | C 0.31466 -2.09288 -1.81422   |
|                      | C 2.57313 0.44669 -1.38678   |                             | C -0.61823 -1.87277 -0.84985  |
|                      | C 2.74138 -0.01717 0.71352   |                             | C 1.25820 -0.90482 -0.21090   |
|                      | N 3.90235 0.57382 0.35477    |                             | N 1.47747 -1.47914 -1.39387   |
|                      | H 4.61416 1.35753 -1.52419   |                             | H 0.25045 -2.63045 -2.75080   |
|                      | H 2.12610 0.50229 -2.37142   |                             | H -1.65221 -2.18347 -0.78350  |
|                      | H 2.54097 -0.36224 1.72146   |                             | H 2.01312 -0.35447 0.35286    |
|                      | C 5.03953 0.84882 1.22255    |                             | C 2.75327 -1.46360 -2.11188   |
|                      | H 4.81787 0.48082 2.22434    |                             | H 3.10194 -2.48771 -2.25146   |
|                      | H 5.93003 0.34171 0.84694    |                             | H 2.61569 -0.98410 -3.08192   |
|                      | H 5.22544 1.92325 1.27145    |                             | H 3.47504 -0.90212 -1.51752   |
|                      | N 1.91639 -0.10691 -0.31316  |                             | N -0.00863 -1.13135 0.14270   |
| <b>1ba</b><br>(MeOH) | C 1.34711 0.44805 -0.07947   | <b>1bb</b><br>(MeOH)        | C -0.83231 -0.39880 -0.02497  |
|                      | C -0.64872 -1.47031 0.04431  |                             | C 1.92269 -0.69602 0.02794    |
|                      | C -0.00098 0.81721 0.00525   |                             | C 0.01084 0.71668 0.00709     |
|                      | C 1.67038 -0.90854 -0.09766  |                             | C -0.25952 -1.67023 -0.03261  |
|                      | C 0.67748 -1.87504 -0.04605  |                             | C 1.11832 -1.82836 0.00476    |
|                      | C -1.00686 -0.13400 0.08454  |                             | C 1.39124 0.58193 0.01588     |
|                      | N -0.43527 2.22007 0.01570   |                             | N -0.49784 2.09498 0.03306    |
|                      | H 2.71411 -1.20306 -0.14874  |                             | H -0.90120 -2.54471 -0.07212  |
|                      | H 0.92950 -2.92984 -0.06879  |                             | H 1.56268 -2.81791 0.00826    |
|                      | H -2.04550 0.16736 0.16447   |                             | H 2.03185 1.45691 0.02472     |
|                      | N -1.70717 -2.48331 0.10667  |                             | N 3.38099 -0.84978 0.05839    |
|                      | O 0.13584 3.00750 -0.72700   |                             | O -1.46204 2.34124 0.74507    |
|                      | O -1.37059 2.50774 0.75552   |                             | O 0.10164 2.92225 -0.64588    |
|                      | O -2.86849 -2.09609 0.18493  |                             | O 4.06505 0.16823 0.07756     |
|                      | O -1.37088 -3.66227 0.07744  |                             | O 3.83461 -1.98907 0.06254    |
|                      | Cl 2.64094 1.58953 -0.09686  |                             | Br -2.71291 -0.28799 -0.14270 |
| <b>1bc</b><br>(MeOH) | C -0.81004 -0.93149 -0.15560 | <b>2b</b> ··2MeOH<br>(MeOH) | C -3.75464 -0.76377 0.16967   |
|                      | C 1.77090 -0.16115 0.46569   |                             | H -4.66240 -1.37196 0.21248   |
|                      | C -0.44652 0.41851 -0.14201  |                             | H -3.68904 -0.18516 1.10178   |
|                      | C 0.14911 -1.88541 0.16326   |                             | H -3.85767 -0.05767 -0.66622  |
|                      | C 1.45641 -1.50907 0.45789   |                             | O -2.64967 -1.63439 0.00151   |
|                      | C 0.83459 0.82341 0.18384    |                             | H -1.82341 -1.07781 -0.03391  |
|                      | N -1.38641 1.49272 -0.49775  |                             | C 2.79575 -2.42871 0.45903    |
|                      | H -0.13265 -2.93287 0.20245  |                             | H 3.62001 -3.06203 0.11212    |
|                      | H 2.21029 -2.25214 0.69526   |                             | H 3.21180 -1.50475 0.86356    |
|                      | H 1.09988 1.87529 0.20640    |                             | H 2.25185 -2.94965 1.25527    |
|                      | N 3.14506 0.25413 0.79337    |                             | O 1.93245 -2.05815 -0.61712   |

|                     |                              |                            |                              |
|---------------------|------------------------------|----------------------------|------------------------------|
|                     | O -1.43966 2.46180 0.24658   |                            | H 1.53927 -2.85740 -1.01266  |
|                     | O -2.01687 1.36066 -1.53804  |                            | C 0.77355 1.86725 -1.26204   |
|                     | O 3.39163 1.45430 0.79554    |                            | C -0.42596 0.91918 -1.19768  |
|                     | O 3.95942 -0.62559 1.04416   |                            | C -0.14688 0.62632 1.20513   |
|                     | S -2.51170 -1.54019 -0.37101 |                            | C 1.06059 1.56644 1.22025    |
|                     | O -2.50162 -2.87927 0.21944  |                            | C 0.97422 2.58083 0.07718    |
|                     | O -3.40508 -0.51548 0.16732  |                            | H -1.34794 1.50202 -1.07512  |
|                     | C -2.77958 -1.71545 -2.11980 |                            | H -0.52684 0.35675 -2.13113  |
|                     | C -2.15039 -2.76552 -2.78824 |                            | H 1.67306 1.28902 -1.50861   |
|                     | C -3.65086 -0.84182 -2.76353 |                            | H 0.62847 2.59306 -2.07013   |
|                     | C -2.39183 -2.92788 -4.14827 |                            | H -1.05653 1.19542 1.43624   |
|                     | H -1.49402 -3.45243 -2.26072 |                            | H -0.04939 -0.14377 1.97680  |
|                     | C -3.89225 -1.02594 -4.12211 |                            | H 1.12015 2.07663 2.18823    |
|                     | H -4.13098 -0.04008 -2.21237 |                            | H 1.97847 0.97364 1.11514    |
|                     | C -3.26086 -2.06031 -4.81148 |                            | H 0.12819 3.25712 0.25725    |
|                     | H -1.90854 -3.73756 -4.68760 |                            | H 1.87414 3.20414 0.04885    |
|                     | H -4.57377 -0.35824 -4.64160 |                            | N -0.35200 -0.04269 -0.08799 |
|                     | H -3.45019 -2.19532 -5.87320 |                            | H 0.43220 -0.67869 -0.25679  |
| <b>2b</b><br>(MeOH) | C -1.87431 1.26709 -0.04769  | <b>2b</b> ..MeOH<br>(MeOH) | C 3.34206 -0.27727 -0.72752  |
|                     | C -0.34516 1.20107 0.01824   |                            | H 4.43277 -0.24325 -0.79470  |
|                     | C -0.38562 -1.22083 0.18348  |                            | H 3.01979 -1.30594 -0.94090  |
|                     | C -1.91625 -1.24433 0.12365  |                            | H 2.93250 0.38055 -1.50672   |
|                     | C -2.44754 -0.02531 -0.63494 |                            | O 2.97023 0.14022 0.57484    |
|                     | H 0.06108 1.17890 -1.00141   |                            | H 1.97837 0.11513 0.63292    |
|                     | H 0.05952 2.09727 0.49970    |                            | C -1.92096 1.26561 -0.04994  |
|                     | H -2.27102 1.41738 0.96503   |                            | C -0.39183 1.24000 -0.01959  |
|                     | H -2.18468 2.13382 -0.64275  |                            | C -0.37331 -1.19159 0.16864  |
|                     | H 0.01885 -1.35084 -0.82880  |                            | C -1.90194 -1.24469 0.14501  |
|                     | H -0.00985 -2.05631 0.78309  |                            | C -2.47643 -0.04508 -0.61269 |
|                     | H -2.25658 -2.17304 -0.34894 |                            | H -0.00270 1.21133 -1.04488  |
|                     | H -2.31545 -1.24247 1.14649  |                            | H 0.00530 2.14649 0.44707    |
|                     | H -2.15550 -0.10221 -1.69068 |                            | H -2.29720 1.41682 0.97011   |
|                     | H -3.54238 -0.00553 -0.61319 |                            | H -2.26349 2.11943 -0.64498  |
|                     | N 0.17123 0.02377 0.72550    |                            | H 0.01537 -1.31484 -0.84976  |
|                     | H -0.09285 0.09530 1.70907   |                            | H 0.03725 -2.00950 0.76843   |
|                     |                              |                            | H -2.23099 -2.18516 -0.31066 |
|                     |                              |                            | H -2.27679 -1.24222 1.17669  |
|                     |                              |                            | H -2.20812 -0.12549 -1.67417 |
|                     |                              |                            | H -3.57024 -0.04951 -0.56383 |
|                     |                              |                            | N 0.15981 0.07636 0.69353    |

|                                    |          |          |          |          |                                    |          |          |          |          |
|------------------------------------|----------|----------|----------|----------|------------------------------------|----------|----------|----------|----------|
|                                    |          |          | H        | -0.09306 | 0.15056                            | 1.68132  |          |          |          |
| <b>TS1<sub>bab</sub></b><br>(MeOH) | N        | 3.46150  | -1.31273 | -0.99321 | <b>IN1<sub>bab</sub></b><br>(MeOH) | N        | -4.18884 | -0.30800 | 0.96147  |
|                                    | C        | 2.23020  | -1.05061 | -0.29796 |                                    | C        | -2.75303 | -0.35911 | 0.64824  |
|                                    | C        | 2.16068  | -0.00221 | 0.64498  |                                    | C        | -1.98043 | -1.38342 | 1.16659  |
|                                    | C        | 1.13362  | -1.85594 | -0.53057 |                                    | C        | -2.21691 | 0.62231  | -0.16744 |
|                                    | C        | -0.05932 | -1.59694 | 0.13172  |                                    | C        | -0.86718 | 0.56204  | -0.47177 |
|                                    | H        | 1.18781  | -2.68319 | -1.22845 |                                    | H        | -2.83616 | 1.41286  | -0.57604 |
|                                    | H        | 3.04679  | 0.58341  | 0.86529  |                                    | H        | -2.42448 | -2.14664 | 1.79679  |
|                                    | C        | 0.99405  | 0.23921  | 1.31234  |                                    | C        | -0.62182 | -1.40906 | 0.87380  |
|                                    | C        | -0.20727 | -0.49204 | 1.03121  |                                    | C        | -0.04173 | -0.44243 | 0.06082  |
|                                    | N        | -1.18090 | -2.44301 | -0.19037 |                                    | N        | -0.39677 | 1.57367  | -1.43193 |
|                                    | H        | 0.95902  | 0.99669  | 2.08825  |                                    | H        | -0.02380 | -2.20528 | 1.30114  |
|                                    | O        | 4.43010  | -0.58395 | -0.75853 |                                    | O        | -4.64350 | -1.18739 | 1.68318  |
|                                    | O        | 3.50288  | -2.25019 | -1.79536 |                                    | O        | -4.84442 | 0.61006  | 0.48328  |
|                                    | O        | -0.96412 | -3.55929 | -0.66619 |                                    | O        | -0.94897 | 2.66232  | -1.42143 |
|                                    | O        | -2.31745 | -1.99813 | -0.00177 |                                    | O        | 0.48374  | 1.24149  | -2.21792 |
|                                    | C        | -2.29245 | 3.19414  | -0.03640 |                                    | C        | 3.71026  | -0.81084 | 0.67922  |
|                                    | C        | -1.40811 | 2.18128  | 0.69257  |                                    | C        | 2.22612  | -0.93329 | 0.99550  |
|                                    | C        | -1.02620 | 0.94083  | -1.37805 |                                    | C        | 1.73611  | -1.32793 | -1.41076 |
|                                    | C        | -1.89230 | 1.92430  | -2.16671 |                                    | C        | 3.21277  | -1.20050 | -1.74783 |
|                                    | C        | -1.89628 | 3.30439  | -1.50883 |                                    | C        | 4.09119  | -1.60914 | -0.56659 |
|                                    | H        | -0.37029 | 2.53188  | 0.70009  |                                    | H        | 1.97011  | -1.97150 | 1.20914  |
|                                    | H        | -1.72918 | 2.05197  | 1.72857  |                                    | H        | 1.93650  | -0.29862 | 1.83341  |
|                                    | H        | -3.34080 | 2.88309  | 0.04679  |                                    | H        | 3.96069  | 0.24576  | 0.55404  |
|                                    | H        | -2.20587 | 4.16274  | 0.46602  |                                    | H        | 4.25485  | -1.17410 | 1.55574  |
|                                    | H        | 0.02412  | 1.25338  | -1.40429 |                                    | H        | 1.47018  | -2.35575 | -1.14712 |
|                                    | H        | -1.09011 | -0.06001 | -1.81111 |                                    | H        | 1.10062  | -0.99212 | -2.22624 |
|                                    | H        | -1.51660 | 1.98021  | -3.19318 |                                    | H        | 3.40562  | -1.83315 | -2.61900 |
|                                    | H        | -2.91591 | 1.53464  | -2.22183 |                                    | H        | 3.42715  | -0.16887 | -2.04761 |
|                                    | H        | -0.89599 | 3.74846  | -1.58513 |                                    | H        | 3.96891  | -2.68174 | -0.37398 |
|                                    | H        | -2.58123 | 3.97391  | -2.03766 |                                    | H        | 5.14493  | -1.44589 | -0.80722 |
| N                                  | -1.41960 | 0.86297  | 0.03702  | N        | 1.40224                            | -0.48165 | -0.19627 |          |          |
| H                                  | -2.34390 | 0.43030  | 0.12188  | H        | 1.71597                            | 0.53060  | -0.32378 |          |          |
| Cl                                 | -1.28118 | -0.66236 | 2.43299  | Cl       | 2.16028                            | 2.41046  | 0.30966  |          |          |
| <b>TS2<sub>bab</sub></b><br>(MeOH) | N        | 4.02872  | 1.60730  | -0.17346 | <b>P<sub>bab</sub></b><br>(MeOH)   | N        | -4.66557 | -1.27503 | -0.64846 |
|                                    | C        | 2.87205  | 0.72304  | 0.02027  |                                    | C        | -3.36741 | -0.73765 | -0.25958 |
|                                    | C        | 2.88996  | -0.55650 | -0.50332 |                                    | C        | -2.95903 | 0.50503  | -0.73100 |
|                                    | C        | 1.78697  | 1.19553  | 0.73415  |                                    | C        | -2.55222 | -1.48756 | 0.56902  |
|                                    | C        | 0.68818  | 0.36735  | 0.90962  |                                    | C        | -1.31287 | -0.97563 | 0.91855  |
|                                    | H        | 1.78473  | 2.19729  | 1.14587  |                                    | H        | -2.85654 | -2.46942 | 0.91250  |

|   |          |          |          |   |          |          |          |
|---|----------|----------|----------|---|----------|----------|----------|
| H | 3.75183  | -0.92193 | -1.05206 | H | -3.60291 | 1.08155  | -1.38682 |
| C | 1.78749  | -1.38146 | -0.31198 | C | -1.73546 | 1.02036  | -0.33899 |
| C | 0.66125  | -0.94769 | 0.38539  | C | -0.86985 | 0.31209  | 0.51583  |
| N | -0.41300 | 0.98400  | 1.67116  | N | -0.46944 | -1.90834 | 1.67235  |
| H | 1.86184  | -2.38613 | -0.72462 | H | -1.47337 | 2.00457  | -0.71897 |
| O | 4.98111  | 1.16644  | -0.80602 | O | -5.36452 | -0.60298 | -1.40271 |
| O | 3.97534  | 2.73385  | 0.30779  | O | -4.99646 | -2.37198 | -0.20276 |
| O | -0.15355 | 1.95733  | 2.36330  | O | -1.00913 | -2.63976 | 2.49174  |
| O | -1.53841 | 0.50013  | 1.56975  | O | 0.73614  | -1.94470 | 1.41850  |
| C | -1.58554 | -4.00681 | -0.07582 | C | 2.14375  | 2.55714  | 0.67655  |
| C | -0.35842 | -3.12316 | -0.25899 | C | 0.71206  | 2.16219  | 0.32896  |
| C | -0.62353 | -2.25144 | 2.01707  | C | 0.51768  | 0.92783  | 2.41789  |
| C | -1.85399 | -3.11569 | 2.24060  | C | 1.94746  | 1.27165  | 2.80844  |
| C | -1.80467 | -4.37948 | 1.38751  | C | 2.37882  | 2.59538  | 2.18351  |
| H | 0.53888  | -3.66901 | 0.03769  | H | 0.02136  | 2.94498  | 0.67201  |
| H | -0.23659 | -2.83395 | -1.30328 | H | 0.59688  | 2.10021  | -0.75429 |
| H | -2.47809 | -3.51425 | -0.47278 | H | 2.84911  | 1.85425  | 0.21546  |
| H | -1.42613 | -4.89991 | -0.68689 | H | 2.34237  | 3.53319  | 0.22413  |
| H | 0.28815  | -2.79646 | 2.28311  | H | -0.16809 | 1.69700  | 2.80222  |
| H | -0.67394 | -1.35236 | 2.62409  | H | 0.23048  | -0.01478 | 2.87702  |
| H | -1.89110 | -3.36178 | 3.30594  | H | 2.00348  | 1.31912  | 3.90021  |
| H | -2.75607 | -2.53522 | 2.02018  | H | 2.61560  | 0.46252  | 2.49025  |
| H | -0.98414 | -5.02024 | 1.73071  | H | 1.79373  | 3.41198  | 2.62328  |
| H | -2.72858 | -4.95318 | 1.49927  | H | 3.43051  | 2.80193  | 2.40214  |
| N | -0.47163 | -1.85952 | 0.56148  | N | 0.35213  | 0.86131  | 0.93869  |
| H | -1.43100 | -1.32870 | 0.07129  | H | 1.69264  | -0.39819 | -0.10377 |
| C | -3.43144 | -0.25912 | -3.03634 | C | 3.28387  | -1.17590 | -2.99838 |
| C | -2.43007 | -1.06329 | -2.21076 | C | 2.46360  | -0.29515 | -2.06725 |
| C | -3.83342 | -0.84305 | -0.20620 | C | 3.55569  | -1.35951 | -0.07982 |
| C | -4.86940 | -0.03613 | -0.98470 | C | 4.38267  | -2.24470 | -1.00043 |
| C | -4.84587 | -0.39772 | -2.47084 | C | 4.61324  | -1.57865 | -2.35798 |
| H | -2.65032 | -2.13253 | -2.29318 | H | 2.97630  | 0.64649  | -1.85647 |
| H | -1.41001 | -0.90607 | -2.57308 | H | 1.47410  | -0.07372 | -2.47228 |
| H | -3.13206 | 0.79635  | -3.03543 | H | 2.70287  | -2.06881 | -3.25808 |
| H | -3.39134 | -0.59996 | -4.07566 | H | 3.44791  | -0.62366 | -3.92750 |
| H | -4.09338 | -1.90678 | -0.22935 | H | 4.07423  | -0.42388 | 0.14519  |
| H | -3.79780 | -0.53194 | 0.84044  | H | 3.29979  | -1.85552 | 0.85734  |
| H | -5.85937 | -0.21816 | -0.55472 | H | 5.33234  | -2.45605 | -0.50170 |
| H | -4.65938 | 1.03331  | -0.85870 | H | 3.87278  | -3.20645 | -1.13237 |
| H | -5.18972 | -1.43165 | -2.59973 | H | 5.24277  | -0.69034 | -2.22915 |

|                                  |    |          |          |          |                                   |    |          |          |          |
|----------------------------------|----|----------|----------|----------|-----------------------------------|----|----------|----------|----------|
|                                  | H  | -5.54079 | 0.23817  | -3.02746 |                                   | H  | 5.15447  | -2.25930 | -3.02013 |
|                                  | N  | -2.46790 | -0.70350 | -0.77032 |                                   | N  | 2.26266  | -0.98312 | -0.74683 |
|                                  | H  | -2.21155 | 0.28664  | -0.69442 |                                   | H  | 1.70282  | -1.83751 | -0.88858 |
|                                  | Cl | 2.67857  | -4.47149 | -1.61827 |                                   | Cl | -1.31902 | 3.95218  | -2.28085 |
| <b>TS1<sub>bab</sub> ···MeOH</b> | N  | 3.45533  | -1.26366 | -1.00067 | <b>TS1<sub>bab</sub> ···2MeOH</b> | N  | 3.62045  | -1.06636 | -1.18656 |
|                                  | C  | 2.22831  | -1.01147 | -0.29655 |                                   | C  | 2.35324  | -0.90276 | -0.52520 |
|                                  | C  | 2.15267  | 0.03504  | 0.64958  |                                   | C  | 2.22980  | -0.01293 | 0.56375  |
|                                  | C  | 1.13919  | -1.82889 | -0.52771 |                                   | C  | 1.27563  | -1.65924 | -0.94093 |
|                                  | C  | -0.05479 | -1.58394 | 0.13632  |                                   | C  | 0.04644  | -1.50639 | -0.31251 |
|                                  | H  | 1.20072  | -2.65459 | -1.22677 |                                   | H  | 1.37427  | -2.36947 | -1.75311 |
|                                  | H  | 3.03196  | 0.62913  | 0.88224  |                                   | H  | 3.09636  | 0.52868  | 0.93260  |
|                                  | C  | 0.98202  | 0.26177  | 1.31619  |                                   | C  | 1.02232  | 0.12358  | 1.18953  |
|                                  | C  | -0.21257 | -0.47982 | 1.03526  |                                   | C  | -0.15503 | -0.54959 | 0.73166  |
|                                  | N  | -1.16822 | -2.44097 | -0.18555 |                                   | N  | -1.04201 | -2.30681 | -0.81775 |
|                                  | H  | 0.93978  | 1.01658  | 2.09449  |                                   | H  | 0.93797  | 0.75173  | 2.07002  |
|                                  | O  | 4.42454  | -0.52899 | -0.77529 |                                   | O  | 4.58376  | -0.40515 | -0.78238 |
|                                  | O  | 3.49898  | -2.19675 | -1.80635 |                                   | O  | 3.70095  | -1.85447 | -2.13171 |
|                                  | O  | -0.94086 | -3.55473 | -0.66227 |                                   | O  | -0.77833 | -3.32495 | -1.46115 |
|                                  | O  | -2.30888 | -2.00709 | 0.00389  |                                   | O  | -2.19559 | -1.92207 | -0.60780 |
|                                  | C  | -2.32594 | 3.18607  | -0.04687 |                                   | C  | -4.94143 | 0.07481  | -1.16464 |
|                                  | C  | -1.43264 | 2.18236  | 0.68382  |                                   | H  | -5.92847 | -0.37200 | -1.00176 |
|                                  | C  | -1.04967 | 0.93449  | -1.38182 |                                   | H  | -5.07613 | 1.08921  | -1.54327 |
|                                  | C  | -1.92577 | 1.90767  | -2.17218 |                                   | H  | -4.39616 | -0.51639 | -1.90876 |
|                                  | C  | -1.93668 | 3.29110  | -1.52155 |                                   | O  | -4.21107 | 0.17927  | 0.05910  |
|                                  | H  | -0.39696 | 2.53925  | 0.68662  |                                   | H  | -4.05717 | -0.71502 | 0.41396  |
|                                  | H  | -1.74949 | 2.05594  | 1.72150  |                                   | C  | -2.02018 | 3.37371  | 0.03099  |
|                                  | H  | -3.37203 | 2.86905  | 0.04220  |                                   | C  | -1.23791 | 2.21788  | 0.65838  |
|                                  | H  | -2.24338 | 4.15782  | 0.45010  |                                   | C  | -0.84890 | 1.21666  | -1.53200 |
|                                  | H  | -0.00170 | 1.25436  | -1.41320 |                                   | C  | -1.60634 | 2.35127  | -2.22590 |
|                                  | H  | -1.10785 | -0.06882 | -1.80991 |                                   | C  | -1.54793 | 3.63621  | -1.39923 |
|                                  | H  | -1.55468 | 1.96078  | -3.20049 |                                   | H  | -0.18219 | 2.49653  | 0.75506  |
|                                  | H  | -2.94679 | 1.51044  | -2.22109 |                                   | H  | -1.61770 | 1.98563  | 1.65650  |
|                                  | H  | -0.93984 | 3.74169  | -1.60446 |                                   | H  | -3.08810 | 3.12598  | 0.03314  |
|                                  | H  | -2.62849 | 3.95302  | -2.05102 |                                   | H  | -1.89559 | 4.26587  | 0.65326  |
|                                  | N  | -1.43773 | 0.86085  | 0.03483  |                                   | H  | 0.22145  | 1.45230  | -1.49001 |
|                                  | H  | -2.35899 | 0.42277  | 0.12435  |                                   | H  | -0.96322 | 0.28378  | -2.08997 |
|                                  | C  | 5.22739  | 2.57683  | 0.33589  |                                   | H  | -1.17934 | 2.50605  | -3.22202 |
|                                  | H  | 4.89306  | 3.51286  | 0.78663  |                                   | H  | -2.65070 | 2.05005  | -2.37019 |
|                                  | H  | 6.27040  | 2.69376  | 0.01814  |                                   | H  | -0.51669 | 4.01061  | -1.37978 |
|                                  | H  | 4.60943  | 2.36698  | -0.54514 |                                   | H  | -2.15854 | 4.41535  | -1.86578 |

|                                   |                              |                                   |                              |
|-----------------------------------|------------------------------|-----------------------------------|------------------------------|
|                                   | O 5.09070 1.56214 1.32806    |                                   | N -1.30604 0.99584 -0.15476  |
|                                   | H 5.33548 0.70847 0.92957    |                                   | H -2.26955 0.63789 -0.14883  |
|                                   | Cl -1.28620 -0.65697 2.43596 |                                   | C 5.28688 2.53245 0.72734    |
|                                   |                              |                                   | H 4.90579 3.41321 1.24704    |
|                                   |                              |                                   | H 6.34761 2.69161 0.49927    |
|                                   |                              |                                   | H 4.73624 2.40899 -0.21263   |
|                                   |                              |                                   | O 5.09799 1.41891 1.59740    |
|                                   |                              |                                   | H 5.38665 0.61356 1.13292    |
|                                   |                              |                                   | Cl -1.32627 -0.88234 2.01407 |
| <b>TS1<sub>bbb</sub> ···2MeOH</b> | N -4.00341 -0.88999 -0.34136 | <b>TS1<sub>bbb</sub> ···2MeOH</b> | N -3.44399 -1.63592 1.71291  |
|                                   | C -2.57057 -0.98485 -0.44373 |                                   | C -2.27894 -1.12829 1.02573  |
|                                   | C -1.94165 -0.89501 -1.70344 |                                   | C -2.35770 -0.77114 -0.33364 |
|                                   | C -1.82790 -1.20250 0.69963  |                                   | C -1.08776 -1.02548 1.71014  |
|                                   | C -0.44384 -1.28755 0.61138  |                                   | C 0.03571 -0.53238 1.05515   |
|                                   | H -2.30828 -1.30222 1.66561  |                                   | H -1.01210 -1.31652 2.75092  |
|                                   | H -2.53330 -0.78535 -2.60819 |                                   | H -3.28451 -0.90350 -0.88595 |
|                                   | C -0.58007 -0.99919 -1.78698 |                                   | C -1.24170 -0.30294 -0.97542 |
|                                   | C 0.24640 -1.11807 -0.62682  |                                   | C -0.00186 -0.07540 -0.29981 |
|                                   | N 0.26962 -1.47590 1.85186   |                                   | N 1.23301 -0.40483 1.84465   |
|                                   | H -0.10244 -1.00083 -2.76079 |                                   | H -1.28800 -0.10315 -2.03888 |
|                                   | O -4.65546 -0.71193 -1.37616 |                                   | O -4.50075 -1.72361 1.08215  |
|                                   | O -4.52765 -0.98624 0.77068  |                                   | O -3.33825 -1.95652 2.89748  |
|                                   | O -0.33698 -1.94154 2.81901  |                                   | O 1.28750 -0.93274 2.95548   |
|                                   | O 1.45435 -1.13519 1.89896   |                                   | O 2.15725 0.25554 1.36040    |
|                                   | C 4.04486 1.20134 2.14518    |                                   | C 3.51326 3.26146 1.59488    |
|                                   | H 4.96841 0.89736 2.65013    |                                   | H 4.60464 3.35845 1.56248    |
|                                   | H 4.13885 2.24626 1.84561    |                                   | H 3.09089 4.20572 1.94284    |
|                                   | H 3.20374 1.10209 2.84033    |                                   | H 3.24177 2.46661 2.29738    |
|                                   | O 3.83183 0.44239 0.95267    |                                   | O 2.97642 3.01583 0.29532    |
|                                   | H 3.72983 -0.49730 1.18871   |                                   | H 3.29632 2.15753 -0.03239   |
|                                   | C 2.17124 2.68931 -1.75829   |                                   | C -0.29695 4.17955 -1.40772  |
|                                   | C 1.55690 1.28864 -1.81084   |                                   | C -0.27434 2.65165 -1.48822  |
|                                   | C 0.27643 1.71030 0.22081    |                                   | C -0.63500 2.46605 0.91917   |
|                                   | C 0.84038 3.12949 0.32577    |                                   | C -0.67024 3.98896 1.06477   |
|                                   | C 1.23335 3.66735 -1.05039   |                                   | C -1.14489 4.65243 -0.22777  |
|                                   | H 0.64956 1.30753 -2.42566   |                                   | H -1.28212 2.27736 -1.70126  |
|                                   | H 2.25196 0.57428 -2.25905   |                                   | H 0.38609 2.31679 -2.29071   |
|                                   | H 3.13000 2.64041 -1.22891   |                                   | H 0.72996 4.54660 -1.29986   |
|                                   | H 2.38416 3.02200 -2.77941   |                                   | H -0.68423 4.57508 -2.35226  |
|                                   | H -0.66963 1.72453 -0.33405  |                                   | H -1.65083 2.07897 0.77576   |

|                      |    |          |          |          |                      |    |          |          |          |
|----------------------|----|----------|----------|----------|----------------------|----|----------|----------|----------|
|                      | H  | 0.07332  | 1.30643  | 1.21583  |                      | H  | -0.22646 | 2.00977  | 1.82419  |
|                      | H  | 0.09321  | 3.77395  | 0.80012  |                      | H  | -1.32537 | 4.24721  | 1.90291  |
|                      | H  | 1.71691  | 3.11953  | 0.98433  |                      | H  | 0.33417  | 4.34683  | 1.31825  |
|                      | H  | 0.33047  | 3.81068  | -1.65729 |                      | H  | -2.19671 | 4.39565  | -0.40611 |
|                      | H  | 1.70792  | 4.64860  | -0.95279 |                      | H  | -1.09596 | 5.74170  | -0.13519 |
|                      | N  | 1.18452  | 0.79413  | -0.47891 |                      | N  | 0.17525  | 2.03483  | -0.22881 |
|                      | H  | 2.03336  | 0.63648  | 0.07852  |                      | H  | 1.15970  | 2.27399  | -0.05922 |
|                      | C  | -4.12896 | 0.97321  | -4.28736 |                      | C  | -6.04005 | -0.12786 | -1.51390 |
|                      | H  | -3.39831 | 1.40836  | -4.97129 |                      | H  | -5.90044 | 0.60988  | -2.30582 |
|                      | H  | -5.13319 | 1.27337  | -4.60951 |                      | H  | -7.11023 | -0.34974 | -1.42602 |
|                      | H  | -3.94823 | 1.36448  | -3.27910 |                      | H  | -5.68580 | 0.29592  | -0.56686 |
|                      | O  | -3.96095 | -0.44161 | -4.34102 |                      | O  | -5.29263 | -1.28470 | -1.88472 |
|                      | H  | -4.57731 | -0.85079 | -3.70825 |                      | H  | -5.37119 | -1.94618 | -1.17453 |
|                      | Br | 1.88473  | -2.09893 | -0.95958 |                      | S  | 1.45434  | -0.30606 | -1.47431 |
|                      |    |          |          |          |                      | O  | 0.82790  | -0.52190 | -2.78411 |
|                      |    |          |          |          |                      | O  | 2.44679  | 0.76708  | -1.38446 |
|                      |    |          |          |          |                      | C  | 2.19166  | -1.84317 | -0.95858 |
|                      |    |          |          |          |                      | C  | 1.49364  | -3.02693 | -1.19792 |
|                      |    |          |          |          |                      | C  | 3.46060  | -1.83451 | -0.38598 |
|                      |    |          |          |          |                      | C  | 2.08266  | -4.23300 | -0.83305 |
|                      |    |          |          |          |                      | H  | 0.51433  | -3.01100 | -1.66825 |
|                      |    |          |          |          |                      | C  | 4.04084  | -3.05089 | -0.03548 |
|                      |    |          |          |          |                      | H  | 3.98146  | -0.89704 | -0.22269 |
|                      |    |          |          |          |                      | C  | 3.35219  | -4.24330 | -0.25345 |
|                      |    |          |          |          |                      | H  | 1.55307  | -5.16512 | -1.00857 |
|                      |    |          |          |          |                      | H  | 5.03231  | -3.06488 | 0.40840  |
|                      |    |          |          |          |                      | H  | 3.80941  | -5.18907 | 0.02544  |
| <b>1ca</b><br>(MeOH) | C  | -1.45349 | 0.21002  | 0.00022  | <b>1cb</b><br>(MeOH) | C  | -0.83303 | 0.29497  | 0.00005  |
|                      | C  | -0.95638 | 1.48610  | 0.00019  |                      | C  | -0.29306 | 1.55353  | 0.00021  |
|                      | C  | 0.46078  | 1.49546  | 0.00005  |                      | C  | 1.12422  | 1.51494  | 0.00008  |
|                      | C  | 0.96934  | 0.22672  | 0.00002  |                      | C  | 1.58850  | 0.22914  | 0.00000  |
|                      | S  | -0.23538 | -1.01329 | -0.00070 |                      | S  | 0.34022  | -0.96661 | -0.00038 |
|                      | H  | -1.57915 | 2.37422  | 0.00044  |                      | H  | -0.88250 | 2.46395  | 0.00045  |
|                      | H  | 1.07797  | 2.38739  | 0.00023  |                      | H  | 1.77122  | 2.38557  | 0.00023  |
|                      | N  | 2.35248  | -0.12298 | 0.00025  |                      | Br | -2.66202 | -0.12219 | 0.00018  |
|                      | O  | 2.63592  | -1.32456 | 0.00018  |                      | N  | 2.95970  | -0.16719 | 0.00011  |
|                      | O  | 3.18251  | 0.78463  | 0.00065  |                      | O  | 3.20213  | -1.37777 | 0.00014  |
|                      | Cl | -3.11298 | -0.22847 | 0.00049  |                      | O  | 3.82004  | 0.71196  | 0.00042  |
| <b>1cc</b><br>(MeOH) | C  | -1.23502 | -0.54715 | -0.18941 | <b>1cd</b><br>(MeOH) | C  | 0.19775  | 0.42059  | -0.00001 |
|                      | C  | -1.37399 | 0.54169  | -1.01422 |                      | C  | -1.07722 | -0.09942 | -0.00005 |



|                      |                             |                      |                              |
|----------------------|-----------------------------|----------------------|------------------------------|
|                      | C -2.69877 1.03721 -0.99194 |                      | C -2.09842 0.89980 -0.00003  |
|                      | C -3.50325 0.30748 -0.15937 |                      | C -1.57690 2.15206 0.00000   |
|                      | S -2.68563 -0.99759 0.63514 |                      | S 0.14918 2.13995 0.00008    |
|                      | H -0.57107 0.95950 -1.61155 |                      | H -3.15674 0.67017 -0.00006  |
|                      | H -3.05355 1.88420 -1.56924 |                      | H -2.10731 3.09695 0.00002   |
|                      | N -4.88718 0.52546 0.07135  |                      | N -1.40895 -1.50220 -0.00010 |
|                      | O -5.46659 -0.24406 0.84697 |                      | O -2.60485 -1.79653 0.00004  |
|                      | O -5.43772 1.46402 -0.50684 |                      | O -0.50099 -2.33076 0.00010  |
|                      | O -0.15553 -1.33331 0.02438 |                      | Cl 1.71492 -0.36712 -0.00002 |
|                      | C 1.11627 -0.78528 0.02243  |                      |                              |
|                      | C 1.39468 0.43149 0.64202   |                      |                              |
|                      | C 2.11503 -1.55711 -0.56441 |                      |                              |
|                      | C 2.70380 0.89085 0.66074   |                      |                              |
|                      | H 0.60558 1.00987 1.11257   |                      |                              |
|                      | C 3.42485 -1.10099 -0.54239 |                      |                              |
|                      | H 1.85695 -2.50306 -1.03086 |                      |                              |
|                      | C 3.69881 0.12009 0.06652   |                      |                              |
|                      | H 2.95341 1.83154 1.13855   |                      |                              |
|                      | H 4.22316 -1.67862 -0.99453 |                      |                              |
|                      | N 5.07663 0.60610 0.08833   |                      |                              |
|                      | O 5.94752 -0.09439 -0.42351 |                      |                              |
|                      | O 5.30113 1.69271 0.61758   |                      |                              |
| <b>1ce</b><br>(MeOH) | C -0.19789 -0.42170 0.00001 | <b>1cf</b><br>(MeOH) | C -0.46740 0.90678 0.11713   |
|                      | C 1.07569 0.09960 0.00002   |                      | C -1.05371 0.72959 1.35230   |
|                      | C 2.09977 -0.89691 0.00001  |                      | C -2.43132 0.40146 1.29832   |
|                      | C 1.58080 -2.15070 -0.00001 |                      | C -2.86822 0.33633 0.00792   |
|                      | S -0.14469 -2.13795 0.00001 |                      | S -1.63049 0.67389 -1.12575  |
|                      | H 3.15750 -0.66473 0.00002  |                      | H -3.04378 0.22390 2.17420   |
|                      | H 2.11371 -3.09428 -0.00002 |                      | S 1.17515 1.40452 -0.41916   |
|                      | Br -1.86883 0.41865 0.00001 |                      | O 1.04241 1.43708 -1.87976   |
|                      | N 1.41018 1.50320 0.00005   |                      | O 1.57831 2.61937 0.28103    |
|                      | O 2.60668 1.79499 -0.00006  |                      | C 2.26916 0.06964 0.00759    |
|                      | O 0.50444 2.33364 -0.00001  |                      | C 2.14795 -1.13642 -0.68164  |
|                      |                             |                      | C 3.25372 0.27988 0.96810    |
|                      |                             |                      | C 3.03548 -2.16487 -0.38363  |
|                      |                             |                      | H 1.38399 -1.27148 -1.44279  |
|                      |                             |                      | C 4.14246 -0.75505 1.24618   |
|                      |                             |                      | H 3.32033 1.23217 1.48364    |
|                      |                             |                      | C 4.03011 -1.97271 0.57661   |
|                      |                             |                      | H 2.95553 -3.11327 -0.90728  |

|                      |   |          |          |          |                                |          |          |          |          |
|----------------------|---|----------|----------|----------|--------------------------------|----------|----------|----------|----------|
|                      |   |          |          | H        | 4.92094                        | -0.60931 | 1.98978  |          |          |
|                      |   |          |          | H        | 4.72398                        | -2.77841 | 0.80181  |          |          |
|                      |   |          |          | H        | -3.86810                       | 0.10461  | -0.34197 |          |          |
|                      |   |          |          | N        | -0.36215                       | 0.84497  | 2.61800  |          |          |
|                      |   |          |          | O        | -1.03532                       | 0.77955  | 3.64251  |          |          |
|                      |   |          |          | O        | 0.85596                        | 0.99569  | 2.59470  |          |          |
| <b>1cg</b><br>(MeOH) | C | 1.07863  | -0.46405 | 0.49302  | <b>TS1<sub>cab</sub>-2MeOH</b> | C        | 0.32458  | -1.53942 | -0.42707 |
|                      | C | 1.59257  | 0.53514  | 1.28782  |                                | C        | 0.11033  | -1.96937 | 0.90872  |
|                      | C | 2.85328  | 1.02833  | 0.83451  |                                | C        | -1.18482 | -1.75292 | 1.33422  |
|                      | C | 3.26556  | 0.38923  | -0.28973 |                                | C        | -2.01426 | -1.25098 | 0.32993  |
|                      | S | 2.14334  | -0.81608 | -0.81390 |                                | S        | -1.18218 | -1.09751 | -1.20616 |
|                      | H | 3.40411  | 1.81458  | 1.33623  |                                | H        | 0.90912  | -2.37867 | 1.51692  |
|                      | O | -0.03258 | -1.21694 | 0.65948  |                                | H        | -1.54453 | -1.94761 | 2.33942  |
|                      | C | -1.27389 | -0.72441 | 0.31159  |                                | N        | -3.32392 | -0.87668 | 0.45415  |
|                      | C | -1.45664 | 0.48711  | -0.34992 |                                | O        | -3.89296 | -0.36191 | -0.55348 |
|                      | C | -2.35003 | -1.54514 | 0.64843  |                                | O        | -3.92497 | -1.03838 | 1.53724  |
|                      | C | -2.74588 | 0.88521  | -0.67812 |                                | C        | -3.15856 | 2.77213  | 0.67366  |
|                      | H | -0.61416 | 1.11929  | -0.61241 |                                | H        | -2.60504 | 3.68300  | 0.91023  |
|                      | C | -3.63485 | -1.14844 | 0.32078  |                                | H        | -4.22643 | 3.01770  | 0.61965  |
|                      | H | -2.16514 | -2.48258 | 1.16408  |                                | H        | -3.00536 | 2.05038  | 1.48603  |
|                      | C | -3.81693 | 0.06582  | -0.33953 |                                | O        | -2.66384 | 2.28661  | -0.56895 |
|                      | H | -2.91824 | 1.82357  | -1.19322 |                                | H        | -3.13680 | 1.45994  | -0.77694 |
|                      | H | -4.48867 | -1.76729 | 0.57252  |                                | C        | 4.51068  | -0.40250 | 2.14617  |
|                      | N | -5.16854 | 0.48793  | -0.68645 |                                | H        | 5.60181  | -0.40218 | 2.05272  |
|                      | O | -6.10447 | -0.25097 | -0.38436 |                                | H        | 4.17946  | 0.60817  | 2.38878  |
|                      | O | -5.31310 | 1.56332  | -1.26596 |                                | H        | 4.21497  | -1.07648 | 2.95724  |
|                      | H | 4.17842  | 0.55116  | -0.85035 |                                | O        | 3.88380  | -0.76010 | 0.91157  |
|                      | N | 0.95301  | 1.03289  | 2.47451  |                                | H        | 4.15708  | -1.65642 | 0.64185  |
|                      | O | 1.57023  | 1.85380  | 3.15259  |                                | C        | 2.34278  | 2.27836  | -1.37988 |
|                      | O | -0.17167 | 0.61687  | 2.75386  |                                | C        | 1.59304  | 0.95227  | -1.53770 |
|                      |   |          |          |          |                                | C        | 0.67042  | 1.14574  | 0.71261  |
|                      |   |          |          |          |                                | C        | 1.40326  | 2.46969  | 0.94074  |
|                      |   |          |          |          |                                | C        | 1.63353  | 3.19638  | -0.38452 |
|                      |   |          |          |          |                                | H        | 0.60982  | 1.13170  | -1.98890 |
|                      |   |          |          |          |                                | H        | 2.14535  | 0.27290  | -2.19024 |
|                      |   |          |          |          |                                | H        | 3.36327  | 2.07263  | -1.03515 |
|                      |   |          |          |          |                                | H        | 2.42653  | 2.75564  | -2.36171 |
|                      |   |          |          |          |                                | H        | -0.33038 | 1.34576  | 0.31187  |
|                      |   |          |          |          |                                | H        | 0.56192  | 0.59388  | 1.64947  |
|                      |   |          |          |          |                                | H        | 0.81461  | 3.08637  | 1.62766  |

|                                |          |          |          |                                |          |          |          |          |
|--------------------------------|----------|----------|----------|--------------------------------|----------|----------|----------|----------|
|                                |          |          | H        | 2.36524                        | 2.27505  | 1.43090  |          |          |
|                                |          |          | H        | 0.66662                        | 3.50697  | -0.79934 |          |          |
|                                |          |          | H        | 2.21864                        | 4.10723  | -0.22396 |          |          |
|                                |          |          | N        | 1.37112                        | 0.28342  | -0.24837 |          |          |
|                                |          |          | H        | 2.26224                        | -0.04225 | 0.14775  |          |          |
|                                |          |          | Cl       | 1.53122                        | -2.32893 | -1.41967 |          |          |
| <b>TS1<sub>cbb</sub>-2MeOH</b> | 0.40589  | -1.23317 | -0.09422 | <b>TS1<sub>ceb</sub>-2MeOH</b> | C        | -5.36964 | -1.87812 | -0.26329 |
| C                              | 0.12487  | -1.61511 | 1.24278  | H                              | -6.10513 | -1.07158 | -0.28577 |          |
| C                              | -1.23019 | -1.69241 | 1.49854  | H                              | -5.90030 | -2.83597 | -0.32810 |          |
| C                              | -2.01453 | -1.47057 | 0.36556  | H                              | -4.83711 | -1.83630 | 0.69551  |          |
| S                              | -1.04350 | -1.21724 | -1.07306 | O                              | -4.49375 | -1.68249 | -1.36754 |          |
| H                              | 0.90818  | -1.77779 | 1.97423  | H                              | -3.82894 | -2.39454 | -1.35093 |          |
| H                              | -1.66292 | -1.90457 | 2.47093  | C                              | -0.57963 | 4.44926  | 2.44569  |          |
| N                              | -3.38035 | -1.42106 | 0.30622  | H                              | 0.03490  | 5.34860  | 2.55984  |          |
| O                              | -3.91707 | -1.12553 | -0.80198 | H                              | -1.54815 | 4.73720  | 2.03440  |          |
| O                              | -4.06323 | -1.65724 | 1.32510  | H                              | -0.73392 | 3.98779  | 3.42707  |          |
| C                              | -4.10657 | 2.13324  | 0.24619  | O                              | 0.00857  | 3.53254  | 1.51910  |          |
| H                              | -3.84703 | 3.17310  | 0.45448  | H                              | 0.88769  | 3.25384  | 1.83546  |          |
| H                              | -5.19344 | 2.06523  | 0.11363  | C                              | -2.42401 | 3.11391  | -1.79125 |          |
| H                              | -3.82027 | 1.52272  | 1.11207  | C                              | -1.47134 | 1.93912  | -1.55093 |          |
| O                              | -3.40499 | 1.74928  | -0.93068 | C                              | -2.76640 | 1.21536  | 0.38748  |          |
| H                              | -3.61686 | 0.81529  | -1.11253 | C                              | -3.75070 | 2.37404  | 0.21190  |          |
| Br                             | 2.01030  | -1.85755 | -0.94067 | C                              | -3.82205 | 2.80576  | -1.25373 |          |
| C                              | 4.65716  | 0.21428  | 1.49280  | H                              | -1.79783 | 1.07226  | -2.13915 |          |
| H                              | 5.17241  | -0.24728 | 2.34182  | H                              | -0.45418 | 2.18998  | -1.85904 |          |
| H                              | 4.58967  | -0.51354 | 0.68374  | H                              | -2.02324 | 4.00599  | -1.29458 |          |
| H                              | 5.23120  | 1.08067  | 1.14678  | H                              | -2.45752 | 3.33306  | -2.86366 |          |
| O                              | 3.31605  | 0.57553  | 1.83561  | H                              | -3.13931 | 0.33470  | -0.14983 |          |
| H                              | 3.32088  | 1.21795  | 2.56938  | H                              | -2.65919 | 0.94964  | 1.44267  |          |
| C                              | 1.60242  | 2.90342  | -1.14351 | H                              | -4.73619 | 2.06508  | 0.57576  |          |
| C                              | 1.20789  | 1.42922  | -1.27433 | H                              | -3.43187 | 3.22006  | 0.83351  |          |
| C                              | -0.02672 | 1.51666  | 0.82560  | H                              | -4.27032 | 1.99871  | -1.84672 |          |
| C                              | 0.34398  | 2.98778  | 1.02726  | H                              | -4.47292 | 3.67893  | -1.36320 |          |
| C                              | 0.57505  | 3.67721  | -0.31758 | N                              | -1.43583 | 1.52939  | -0.14221 |          |
| H                              | 0.27792  | 1.34163  | -1.84879 | H                              | -0.97704 | 2.24946  | 0.42840  |          |
| H                              | 1.98290  | 0.86868  | -1.80080 | C                              | -0.10614 | -0.09588 | 0.19468  |          |
| H                              | 2.58814  | 2.96878  | -0.66729 | C                              | -0.21990 | -0.38531 | 1.57337  |          |
| H                              | 1.70247  | 3.33208  | -2.14599 | C                              | -0.97177 | -1.52134 | 1.81647  |          |
| H                              | -0.98256 | 1.44797  | 0.29283  | C                              | -1.36483 | -2.17454 | 0.65013  |          |
| H                              | -0.13097 | 1.00680  | 1.78628  | S                              | -0.76416 | -1.39062 | -0.79582 |          |

|                                |   |          |          |          |                                |   |          |          |          |
|--------------------------------|---|----------|----------|----------|--------------------------------|---|----------|----------|----------|
|                                | H | -0.45734 | 3.48117  | 1.58680  |                                | H | 0.20539  | 0.26050  | 2.33395  |
|                                | H | 1.25084  | 3.05286  | 1.64078  |                                | H | -1.24020 | -1.88635 | 2.80246  |
|                                | H | -0.37306 | 3.72581  | -0.86735 |                                | N | -2.16917 | -3.28514 | 0.56543  |
|                                | H | 0.90836  | 4.70858  | -0.16596 |                                | O | -2.50252 | -3.69123 | -0.58309 |
|                                | N | 0.97944  | 0.79763  | 0.03229  |                                | O | -2.55395 | -3.85773 | 1.60410  |
|                                | H | 1.85624  | 0.72987  | 0.56534  |                                | O | 0.90138  | 0.67457  | -0.33663 |
|                                |   |          |          |          |                                | C | 2.21418  | 0.27177  | -0.27184 |
|                                |   |          |          |          |                                | C | 3.12797  | 1.22017  | -0.74247 |
|                                |   |          |          |          |                                | C | 2.64331  | -0.97041 | 0.19771  |
|                                |   |          |          |          |                                | C | 4.48056  | 0.93271  | -0.74251 |
|                                |   |          |          |          |                                | H | 2.75894  | 2.17534  | -1.10376 |
|                                |   |          |          |          |                                | C | 4.00262  | -1.25809 | 0.19818  |
|                                |   |          |          |          |                                | H | 1.94318  | -1.71244 | 0.56049  |
|                                |   |          |          |          |                                | C | 4.90380  | -0.30864 | -0.26866 |
|                                |   |          |          |          |                                | H | 5.20289  | 1.65656  | -1.10259 |
|                                |   |          |          |          |                                | H | 4.35929  | -2.21689 | 0.55757  |
|                                |   |          |          |          |                                | N | 6.32727  | -0.61870 | -0.26458 |
|                                |   |          |          |          |                                | O | 6.68487  | -1.71709 | 0.15920  |
|                                |   |          |          |          |                                | O | 7.10984  | 0.23253  | -0.68550 |
| <b>TS1<sub>ceb</sub>-2MeOH</b> | C | 0.36441  | 3.12351  | 1.34054  | <b>TS1<sub>ceb</sub>-2MeOH</b> | C | -0.94537 | 2.93752  | -1.65298 |
|                                | C | 0.21306  | 1.63127  | 1.64769  |                                | C | -0.42597 | 1.50045  | -1.74816 |
|                                | C | 0.85129  | 2.52384  | -1.05134 |                                | C | -1.81147 | 2.41049  | 0.64624  |
|                                | C | 1.30511  | 3.34581  | 0.15577  |                                | C | -2.14890 | 3.02259  | -0.71394 |
|                                | H | 1.17239  | 1.21954  | 1.97881  |                                | H | -1.18397 | 0.86002  | -2.21174 |
|                                | H | -0.51759 | 1.46975  | 2.44428  |                                | H | 0.47732  | 1.45277  | -2.36123 |
|                                | H | -0.62269 | 3.54638  | 1.11853  |                                | H | -0.14059 | 3.58729  | -1.28894 |
|                                | H | 0.73626  | 3.63226  | 2.23585  |                                | H | -1.20754 | 3.28504  | -2.65752 |
|                                | H | 1.57233  | 2.60522  | -1.87109 |                                | H | -2.69586 | 2.38172  | 1.29086  |
|                                | H | -0.10488 | 2.90845  | -1.42697 |                                | H | -1.06338 | 3.02859  | 1.15723  |
|                                | H | 2.32184  | 3.04366  | 0.43483  |                                | H | -2.99473 | 2.48079  | -1.15477 |
|                                | H | 1.34694  | 4.40883  | -0.10118 |                                | H | -2.46502 | 4.06352  | -0.59488 |
|                                | N | -0.21672 | 0.87033  | 0.46527  |                                | N | -0.11657 | 0.94095  | -0.42455 |
|                                | H | -1.16576 | 1.16556  | 0.20020  |                                | H | 0.66886  | 1.45886  | -0.00928 |
|                                | C | -0.43981 | -1.16518 | 0.86862  |                                | C | 0.58162  | -1.02847 | -0.53389 |
|                                | C | -0.40966 | -1.84787 | -0.37513 |                                | C | 0.40697  | -1.61193 | 0.74570  |
|                                | C | 0.83199  | -2.53254 | -0.62884 |                                | C | -0.69276 | -2.54057 | 0.81489  |
|                                | S | 0.99808  | -1.61707 | 1.77879  |                                | S | -0.49094 | -1.84449 | -1.66027 |
|                                | H | 1.04584  | -3.01982 | -1.57232 |                                | H | -1.00857 | -3.00070 | 1.74333  |
|                                | C | 1.68148  | -2.47885 | 0.41357  |                                | C | -1.27846 | -2.74615 | -0.37927 |
|                                | H | 2.68225  | -2.88691 | 0.48944  |                                | H | -2.12981 | -3.37370 | -0.61448 |

|                                  |    |          |          |          |                                  |    |          |          |          |
|----------------------------------|----|----------|----------|----------|----------------------------------|----|----------|----------|----------|
|                                  | N  | -1.43654 | -1.82862 | -1.30864 |                                  | N  | 1.16491  | -1.29679 | 1.86582  |
|                                  | O  | -1.32665 | -2.52158 | -2.33838 |                                  | O  | 0.97132  | -1.92889 | 2.92198  |
|                                  | O  | -2.45060 | -1.11846 | -1.10799 |                                  | O  | 2.02324  | -0.38538 | 1.80042  |
|                                  | C  | 0.69457  | 1.04931  | -0.67534 |                                  | C  | -1.27120 | 0.98819  | 0.48507  |
|                                  | H  | 1.66885  | 0.63381  | -0.39815 |                                  | H  | -2.05255 | 0.33853  | 0.07696  |
|                                  | H  | 0.30466  | 0.47280  | -1.51855 |                                  | H  | -0.96250 | 0.58037  | 1.45130  |
|                                  | C  | -3.35705 | 2.35762  | -1.47095 |                                  | C  | 2.01676  | 3.21652  | 2.03249  |
|                                  | H  | -4.41547 | 2.22942  | -1.72382 |                                  | H  | 2.97123  | 3.35840  | 2.55164  |
|                                  | H  | -3.18546 | 3.40163  | -1.20431 |                                  | H  | 1.69200  | 4.17715  | 1.62968  |
|                                  | H  | -2.74755 | 2.11139  | -2.34815 |                                  | H  | 1.26839  | 2.86248  | 2.75099  |
|                                  | O  | -2.99722 | 1.56697  | -0.33874 |                                  | O  | 2.15670  | 2.32074  | 0.93048  |
|                                  | H  | -3.10083 | 0.62590  | -0.56712 |                                  | H  | 2.40386  | 1.44265  | 1.27087  |
|                                  | C  | 4.18102  | -0.04581 | -1.80347 |                                  | C  | -4.41838 | -0.77356 | 1.45645  |
|                                  | H  | 3.98866  | 0.82556  | -2.43174 |                                  | H  | -4.52974 | 0.21565  | 1.90385  |
|                                  | H  | 5.16285  | -0.45676 | -2.06783 |                                  | H  | -5.27000 | -1.39278 | 1.76325  |
|                                  | H  | 3.41159  | -0.80096 | -2.00404 |                                  | H  | -3.49335 | -1.22751 | 1.83138  |
|                                  | O  | 4.14293  | 0.40222  | -0.45004 |                                  | O  | -4.38216 | -0.58827 | 0.04328  |
|                                  | H  | 4.31803  | -0.34880 | 0.14438  |                                  | H  | -4.29160 | -1.45336 | -0.39393 |
|                                  | Cl | -1.88672 | -0.98519 | 1.84432  |                                  | Br | 2.30337  | -0.59910 | -1.28182 |
| <b>TS1<sub>cfb</sub>...2MeOH</b> | C  | -3.18558 | 1.64673  | -1.96791 | <b>TS1<sub>egb</sub>...2MeOH</b> | C  | -3.13704 | 2.35306  | -1.98222 |
|                                  | C  | -1.95042 | 0.75024  | -1.85347 |                                  | C  | -2.08551 | 1.24892  | -1.84181 |
|                                  | C  | -3.67044 | 1.21078  | 0.45172  |                                  | C  | -4.13862 | 1.59578  | 0.19771  |
|                                  | C  | -4.25865 | 1.24208  | -0.95845 |                                  | C  | -4.42866 | 1.97398  | -1.25608 |
|                                  | H  | -2.20476 | -0.27905 | -2.12809 |                                  | H  | -2.42698 | 0.34383  | -2.35667 |
|                                  | H  | -1.16199 | 1.09416  | -2.52451 |                                  | H  | -1.13489 | 1.55242  | -2.28799 |
|                                  | H  | -2.88777 | 2.68800  | -1.79889 |                                  | H  | -2.73583 | 3.28501  | -1.56604 |
|                                  | H  | -3.56621 | 1.58365  | -2.99248 |                                  | H  | -3.32567 | 2.53274  | -3.04579 |
|                                  | H  | -4.40384 | 0.83693  | 1.17338  |                                  | H  | -5.04590 | 1.23682  | 0.69466  |
|                                  | H  | -3.39807 | 2.22503  | 0.76593  |                                  | H  | -3.79933 | 2.47998  | 0.75166  |
|                                  | H  | -4.64438 | 0.24695  | -1.21012 |                                  | H  | -4.89540 | 1.12099  | -1.76414 |
|                                  | H  | -5.10378 | 1.93589  | -1.00385 |                                  | H  | -5.14508 | 2.80035  | -1.29913 |
|                                  | N  | -1.41617 | 0.72451  | -0.47826 |                                  | N  | -1.83833 | 0.89943  | -0.43679 |
|                                  | H  | -1.06131 | 1.65751  | -0.22816 |                                  | H  | -1.39368 | 1.69914  | 0.03000  |
|                                  | C  | 0.14645  | -0.57385 | -0.23390 |                                  | C  | -0.34681 | -0.58493 | -0.24811 |
|                                  | C  | 0.32358  | -0.83330 | 1.15198  |                                  | C  | -0.45638 | -1.13653 | 1.05069  |
|                                  | C  | -0.07549 | -2.14967 | 1.56986  |                                  | C  | -1.08044 | -2.43303 | 1.07473  |
|                                  | S  | -0.30803 | -2.09488 | -0.99960 |                                  | S  | -0.80726 | -1.81600 | -1.42236 |
|                                  | H  | -0.07423 | -2.45818 | 2.60835  |                                  | H  | -1.31949 | -2.95188 | 1.99501  |
|                                  | C  | -0.45801 | -2.92235 | 0.53646  |                                  | C  | -1.32916 | -2.91319 | -0.15927 |
|                                  | H  | -0.81935 | -3.94382 | 0.55296  |                                  | H  | -1.79810 | -3.85137 | -0.43072 |

|                                  |   |          |          |          |                                  |   |          |          |          |
|----------------------------------|---|----------|----------|----------|----------------------------------|---|----------|----------|----------|
|                                  | N | 0.74473  | 0.13174  | 2.05810  |                                  | N | -0.04029 | -0.49139 | 2.20950  |
|                                  | O | 0.88450  | -0.17226 | 3.25748  |                                  | O | -0.18796 | -1.06437 | 3.30301  |
|                                  | O | 0.96373  | 1.28859  | 1.63528  |                                  | O | 0.48642  | 0.64514  | 2.13451  |
|                                  | C | -2.43459 | 0.31201  | 0.50455  |                                  | C | -3.06472 | 0.50854  | 0.27020  |
|                                  | H | -2.72042 | -0.72060 | 0.28077  |                                  | H | -3.43899 | -0.41277 | -0.18934 |
|                                  | H | -1.98157 | 0.33908  | 1.49811  |                                  | H | -2.80490 | 0.28584  | 1.30932  |
|                                  | C | -0.94097 | 3.99006  | 1.66393  |                                  | C | -0.72637 | 3.97759  | 1.89005  |
|                                  | H | -0.32866 | 4.86001  | 1.92840  |                                  | H | 0.11708  | 4.43788  | 2.41692  |
|                                  | H | -1.98577 | 4.30199  | 1.61670  |                                  | H | -1.29725 | 4.76254  | 1.39149  |
|                                  | H | -0.82813 | 3.22389  | 2.43833  |                                  | H | -1.37425 | 3.47898  | 2.62025  |
|                                  | O | -0.59349 | 3.48560  | 0.37498  |                                  | O | -0.27637 | 3.07502  | 0.88076  |
|                                  | H | 0.31708  | 3.14237  | 0.39805  |                                  | H | 0.19940  | 2.34055  | 1.30901  |
|                                  | C | -4.51144 | -2.80375 | 1.35555  |                                  | C | -5.40685 | -2.44688 | 0.57080  |
|                                  | H | -5.13539 | -1.96672 | 1.67355  |                                  | H | -6.00585 | -1.58866 | 0.88018  |
|                                  | H | -5.04891 | -3.73720 | 1.56164  |                                  | H | -6.00490 | -3.35634 | 0.70511  |
|                                  | H | -3.58185 | -2.79062 | 1.93730  |                                  | H | -4.51888 | -2.50527 | 1.21165  |
|                                  | O | -4.26617 | -2.63203 | -0.03864 |                                  | O | -5.06038 | -2.23973 | -0.79665 |
|                                  | H | -3.71795 | -3.36770 | -0.36461 |                                  | H | -4.52564 | -2.98964 | -1.11202 |
|                                  | S | 1.34322  | 0.37946  | -1.29045 |                                  | O | 0.57544  | 0.34753  | -0.65341 |
|                                  | O | 1.21700  | -0.22647 | -2.62153 |                                  | C | 1.92391  | 0.10724  | -0.54292 |
|                                  | O | 1.12909  | 1.82257  | -1.18383 |                                  | C | 2.72749  | 1.22355  | -0.79266 |
|                                  | C | 2.93991  | -0.03772 | -0.62686 |                                  | C | 2.48584  | -1.13279 | -0.23719 |
|                                  | C | 3.48856  | -1.27984 | -0.94645 |                                  | C | 4.10404  | 1.10638  | -0.73506 |
|                                  | C | 3.61852  | 0.89417  | 0.15432  |                                  | H | 2.25449  | 2.17259  | -1.02593 |
|                                  | C | 4.74913  | -1.59760 | -0.45194 |                                  | C | 3.86890  | -1.24885 | -0.17586 |
|                                  | H | 2.94815  | -1.97908 | -1.57757 |                                  | H | 1.87156  | -2.00573 | -0.05258 |
|                                  | C | 4.88236  | 0.56272  | 0.63595  |                                  | C | 4.66074  | -0.13389 | -0.42397 |
|                                  | H | 3.16806  | 1.85544  | 0.37489  |                                  | H | 4.74352  | 1.96141  | -0.92316 |
|                                  | C | 5.44193  | -0.67893 | 0.33796  |                                  | H | 4.32912  | -2.20198 | 0.05940  |
|                                  | H | 5.19336  | -2.56011 | -0.68946 |                                  | N | 6.11007  | -0.26494 | -0.35989 |
|                                  | H | 5.43017  | 1.27787  | 1.24321  |                                  | O | 6.58574  | -1.36403 | -0.07714 |
|                                  | H | 6.42835  | -0.93137 | 0.71829  |                                  | O | 6.79582  | 0.73010  | -0.59200 |
| <b>1da</b><br>(H <sub>2</sub> O) | C | 3.62612  | -1.61121 | 0.85938  | <b>1db</b><br>(H <sub>2</sub> O) | C | -2.94375 | -0.69197 | 1.24193  |
|                                  | C | 2.52951  | -0.76730 | 0.97074  |                                  | C | -1.58850 | -0.97847 | 1.32768  |
|                                  | C | 2.43592  | 0.33080  | 0.12383  |                                  | C | -0.78268 | -0.78282 | 0.21050  |
|                                  | C | 3.41087  | 0.62228  | -0.82297 |                                  | C | -1.29539 | -0.31147 | -0.99264 |
|                                  | C | 4.50937  | -0.21860 | -0.93824 |                                  | C | -2.65117 | -0.02465 | -1.08535 |
|                                  | C | 4.59625  | -1.32319 | -0.09604 |                                  | C | -3.45211 | -0.21863 | 0.03545  |
|                                  | H | 3.73154  | -2.47735 | 1.50282  |                                  | H | -3.59928 | -0.83451 | 2.09359  |
|                                  | H | 1.75216  | -0.95425 | 1.70565  |                                  | H | -1.15708 | -1.35546 | 2.25036  |

|                                 |                                                                                                                                                                                                                                                                                                                                                                                                                                                                                                                                                                                                |                                 |                                                                                                                                                                                                                                                                                                                                                                                                         |
|---------------------------------|------------------------------------------------------------------------------------------------------------------------------------------------------------------------------------------------------------------------------------------------------------------------------------------------------------------------------------------------------------------------------------------------------------------------------------------------------------------------------------------------------------------------------------------------------------------------------------------------|---------------------------------|---------------------------------------------------------------------------------------------------------------------------------------------------------------------------------------------------------------------------------------------------------------------------------------------------------------------------------------------------------------------------------------------------------|
|                                 | H 3.30675 1.49684 -1.45826<br>H 5.28857 -0.02245 -1.66605<br>O 1.38447 1.22257 0.29805<br>N 5.75319 -2.21100 -0.21535<br>O 6.60445 -1.94529 -1.06112<br>O 5.82019 -3.18184 0.53534<br>C 0.22483 1.07781 -0.38438<br>C -0.72531 2.15248 -0.01852<br>C -1.99754 2.20165 -0.60635<br>C -0.36663 3.13408 0.91916<br>C -2.89096 3.20901 -0.26476<br>H -2.27896 1.44519 -1.33144<br>C -1.26447 4.14054 1.25790<br>H 0.61331 3.10927 1.38208<br>C -2.52732 4.18119 0.66806<br>H -3.87414 3.23733 -0.72656<br>H -0.97761 4.89572 1.98467<br>H -3.22751 4.96893 0.93443<br>S -0.04230 -0.13443 -1.45539 |                                 | H -0.63615 -0.17688 -1.84526<br>H -3.08228 0.34305 -2.00962<br>O 0.56253 -1.13122 0.26353<br>N -4.88079 0.08208 -0.05819<br>O -5.31844 0.49578 -1.12964<br>O -5.57787 -0.09279 0.93891<br>C 1.42951 -0.26272 0.86409<br>C 2.82508 -0.80902 0.84143<br>H 2.85298 -1.76942 1.36135<br>H 3.13565 -0.98323 -0.19134<br>H 3.50181 -0.10441 1.32117<br>O 1.07606 0.79396 1.33264                              |
| <b>2d</b><br>(H <sub>2</sub> O) | C 3.42827 1.15664 0.07574<br>C 4.86077 1.09095 0.07644<br>C 5.52023 2.36431 0.07566<br>C 4.82527 3.56712 0.07458<br>C 3.43121 3.56725 0.07414<br>C 2.73419 2.35994 0.07471<br>H 2.87576 0.21892 0.07609<br>H 6.60858 2.37387 0.07593<br>H 5.36800 4.50989 0.07408<br>H 1.64636 2.36141 0.07430<br>O 5.50503 -0.02507 0.07706<br>Cl 2.54618 5.10029 0.07274                                                                                                                                                                                                                                     | <b>2e</b><br>(H <sub>2</sub> O) | C -1.09816 0.04840 -0.00441<br>O -1.88496 1.01771 -0.01596<br>C 0.33835 0.22815 0.00159<br>N 1.08961 -0.86728 0.01386<br>O 2.37003 -0.69179 0.01903<br>C -1.69295 -1.34758 0.00328<br>H -2.33054 -1.45862 -0.87890<br>H -0.93726 -2.12998 0.01303<br>H -2.33939 -1.44522 0.88059<br>C 0.94161 1.60280 -0.00601<br>H 1.58809 1.74119 -0.87976<br>H 0.15542 2.35822 -0.01589<br>H 1.57914 1.75470 0.87206 |
| <b>TS1<sub>dab</sub></b>        | C -4.93593 -1.63663 0.98052<br>C -4.07997 -0.56555 1.19235<br>C -2.82814 -0.54349 0.57589<br>C -2.41972 -1.58283 -0.26383<br>C -3.27026 -2.65534 -0.47649<br>C -4.51691 -2.67212 0.14970<br>H -5.91100 -1.67404 1.45274<br>H -4.37023 0.25989 1.83542                                                                                                                                                                                                                                                                                                                                          | <b>IN1<sub>dab</sub></b>        | C 2.88860 2.01948 -1.25422<br>C 1.55801 1.67732 -1.11982<br>C 1.16409 0.63877 -0.25436<br>C 2.13847 -0.05321 0.48520<br>C 3.47425 0.28826 0.34865<br>C 3.84474 1.31805 -0.51531<br>H 3.19236 2.81906 -1.92038<br>H 0.79121 2.20325 -1.68086                                                                                                                                                             |

|                          |    |          |          |          |                        |   |          |          |          |
|--------------------------|----|----------|----------|----------|------------------------|---|----------|----------|----------|
|                          | H  | -1.45104 | -1.51169 | -0.74150 |                        | H | 1.85056  | -0.83765 | 1.17019  |
|                          | H  | -2.98000 | -3.47223 | -1.12767 |                        | H | 4.23392  | -0.24134 | 0.91287  |
|                          | O  | -2.08254 | 0.58890  | 0.76231  |                        | O | -0.15413 | 0.38761  | -0.24302 |
|                          | N  | -5.40803 | -3.80016 | -0.07688 |                        | N | 5.24102  | 1.66668  | -0.64890 |
|                          | O  | -5.02344 | -4.71406 | -0.80743 |                        | O | 6.07449  | 1.03919  | 0.01076  |
|                          | O  | -6.51132 | -3.79591 | 0.47066  |                        | O | 5.55078  | 2.58033  | -1.41901 |
|                          | C  | -0.74768 | 0.55916  | 1.11177  |                        | C | -0.78748 | -0.58222 | 0.66173  |
|                          | C  | -0.24650 | 1.96296  | 1.22653  |                        | C | -0.36704 | -1.98989 | 0.21497  |
|                          | C  | 1.03696  | 2.21539  | 1.72085  |                        | C | -0.11455 | -3.01301 | 1.12636  |
|                          | C  | -1.04590 | 3.05026  | 0.84698  |                        | C | -0.27177 | -2.26648 | -1.15411 |
|                          | C  | 1.51174  | 3.51977  | 1.83475  |                        | C | 0.23732  | -4.28842 | 0.68280  |
|                          | H  | 1.65725  | 1.37922  | 2.02373  |                        | H | -0.18725 | -2.79235 | 2.18613  |
|                          | C  | -0.57290 | 4.35368  | 0.96629  |                        | C | 0.08222  | -3.53688 | -1.59980 |
|                          | H  | -2.04290 | 2.87522  | 0.45948  |                        | H | -0.47291 | -1.48025 | -1.87555 |
|                          | C  | 0.70969  | 4.59607  | 1.45978  |                        | C | 0.33923  | -4.55501 | -0.68068 |
|                          | H  | 2.51321  | 3.69500  | 2.21993  |                        | H | 0.43373  | -5.07547 | 1.40685  |
|                          | H  | -1.20920 | 5.18518  | 0.67319  |                        | H | 0.15739  | -3.73363 | -2.66650 |
|                          | H  | 1.07811  | 5.61470  | 1.55300  |                        | H | 0.61686  | -5.54768 | -1.02662 |
|                          | S  | -0.12239 | -0.71128 | 2.02180  |                        | S | -0.61632 | -0.16625 | 2.38308  |
|                          | O  | -0.13235 | 0.35677  | -0.81861 |                        | C | -3.98431 | 0.66854  | -0.02761 |
|                          | C  | 1.14103  | 0.08533  | -1.00802 |                        | C | -4.73022 | -0.54843 | -0.48221 |
|                          | C  | 2.07387  | 1.10425  | -1.32617 |                        | H | -4.29397 | -0.93823 | -1.40640 |
|                          | C  | 1.64551  | -1.23509 | -0.90816 |                        | H | -4.65137 | -1.34137 | 0.26620  |
|                          | C  | 3.41586  | 0.82287  | -1.55315 |                        | H | -5.77822 | -0.30599 | -0.65169 |
|                          | H  | 1.71349  | 2.12668  | -1.40019 |                        | N | -2.74614 | 0.69296  | 0.31232  |
|                          | C  | 2.98957  | -1.52171 | -1.13117 |                        | O | -2.16336 | -0.53746 | 0.17669  |
|                          | H  | 0.95653  | -2.03807 | -0.66568 |                        | C | -4.68541 | 1.99018  | 0.05464  |
|                          | C  | 3.86740  | -0.49136 | -1.45219 |                        | O | -5.87692 | 2.05925  | -0.22326 |
|                          | H  | 4.10966  | 1.62039  | -1.80633 |                        | C | -3.90320 | 3.21048  | 0.46728  |
|                          | H  | 3.35198  | -2.54393 | -1.05863 |                        | H | -4.58289 | 4.05964  | 0.53942  |
|                          | Cl | 5.56916  | -0.85270 | -1.74338 |                        | H | -3.39936 | 3.04431  | 1.42161  |
|                          |    |          |          |          |                        | H | -3.12308 | 3.42217  | -0.26851 |
| <b>TS2<sub>dab</sub></b> | C  | 3.31788  | 0.14379  | 1.21655  | <b>P<sub>dab</sub></b> | C | 2.43617  | -0.15880 | -1.47642 |
|                          | C  | 2.08654  | 0.58412  | 0.77065  |                        | C | 2.30228  | -1.57810 | -1.07615 |
|                          | C  | 1.37857  | -0.11912 | -0.23800 |                        | C | 1.65984  | -2.49134 | -1.92398 |
|                          | C  | 1.96669  | -1.29951 | -0.76444 |                        | C | 2.82702  | -2.02920 | 0.14544  |
|                          | C  | 3.19717  | -1.74331 | -0.32486 |                        | C | 1.54286  | -3.82644 | -1.55772 |
|                          | C  | 3.87072  | -1.01956 | 0.66830  |                        | H | 1.24846  | -2.14493 | -2.86647 |
|                          | H  | 3.86133  | 0.68732  | 1.98167  |                        | C | 2.71575  | -3.36875 | 0.50297  |
|                          | H  | 1.64287  | 1.48744  | 1.17433  |                        | H | 3.33351  | -1.33617 | 0.80820  |



|                          |   |          |          |          |                          |   |          |          |          |
|--------------------------|---|----------|----------|----------|--------------------------|---|----------|----------|----------|
|                          | H | 1.42519  | -1.84421 | -1.53203 |                          | C | 2.07216  | -4.26947 | -0.34475 |
|                          | H | 3.64673  | -2.64101 | -0.73480 |                          | H | 1.03626  | -4.52437 | -2.21879 |
|                          | O | 0.22159  | 0.31129  | -0.68251 |                          | H | 3.13379  | -3.71054 | 1.44598  |
|                          | N | 5.15329  | -1.47668 | 1.12812  |                          | H | 1.98258  | -5.31507 | -0.06124 |
|                          | O | 5.63331  | -2.50634 | 0.63641  |                          | C | 3.47303  | 4.03937  | 0.29385  |
|                          | O | 5.74138  | -0.82866 | 2.00356  |                          | O | 3.35990  | 4.79714  | 1.24276  |
|                          | C | -1.30859 | -0.16128 | 0.28633  |                          | C | 4.07926  | 4.46545  | -1.01397 |
|                          | C | -1.43693 | -1.56157 | -0.25313 |                          | H | 4.31230  | 5.52900  | -0.96781 |
|                          | C | -1.06756 | -2.66052 | 0.52494  |                          | H | 4.99056  | 3.89320  | -1.20696 |
|                          | C | -1.90125 | -1.78736 | -1.55685 |                          | H | 3.39616  | 4.26030  | -1.84103 |
|                          | C | -1.16198 | -3.95607 | 0.01880  |                          | C | 2.98730  | 2.61239  | 0.44603  |
|                          | H | -0.71249 | -2.49055 | 1.53558  |                          | N | 3.10808  | 1.90835  | -0.61621 |
|                          | C | -2.00386 | -3.08039 | -2.05928 |                          | O | 2.69230  | 0.59412  | -0.37472 |
|                          | H | -2.17767 | -0.94656 | -2.18247 |                          | C | 2.43032  | 2.15336  | 1.75554  |
|                          | C | -1.63311 | -4.17317 | -1.27376 |                          | H | 3.08654  | 1.39839  | 2.19786  |
|                          | H | -0.86832 | -4.79840 | 0.64025  |                          | H | 2.34342  | 2.99613  | 2.43893  |
|                          | H | -2.37032 | -3.23663 | -3.07094 |                          | H | 1.45250  | 1.68919  | 1.60909  |
|                          | H | -1.71137 | -5.18342 | -1.66784 |                          | S | 2.27723  | 0.43569  | -2.99048 |
|                          | S | -1.09604 | 0.14785  | 1.94156  |                          |   |          |          |          |
|                          | C | -2.99026 | 2.63553  | -0.84415 |                          |   |          |          |          |
|                          | C | -4.03605 | 2.02595  | -1.72562 |                          |   |          |          |          |
|                          | H | -3.56924 | 1.55300  | -2.59444 |                          |   |          |          |          |
|                          | H | -4.57802 | 1.24490  | -1.18676 |                          |   |          |          |          |
|                          | H | -4.73239 | 2.79097  | -2.06537 |                          |   |          |          |          |
|                          | N | -2.07910 | 1.99089  | -0.21173 |                          |   |          |          |          |
|                          | O | -2.16366 | 0.64278  | -0.47256 |                          |   |          |          |          |
|                          | C | -2.95436 | 4.12528  | -0.64533 |                          |   |          |          |          |
|                          | O | -3.80597 | 4.81938  | -1.18406 |                          |   |          |          |          |
|                          | C | -1.86632 | 4.72410  | 0.20553  |                          |   |          |          |          |
|                          | H | -2.03763 | 5.79649  | 0.29843  |                          |   |          |          |          |
|                          | H | -1.84215 | 4.25467  | 1.19110  |                          |   |          |          |          |
|                          | H | -0.89083 | 4.54300  | -0.25355 |                          |   |          |          |          |
| <b>TS1<sub>dae</sub></b> | C | 3.18618  | 0.36732  | 0.08710  | <b>IN1<sub>dae</sub></b> | C | -3.55826 | -1.32167 | 0.07400  |
|                          | C | 1.83290  | 0.09196  | -0.02730 |                          | C | -2.34180 | -0.67692 | 0.22405  |
|                          | C | 1.40023  | -1.23275 | 0.04735  |                          | C | -2.27379 | 0.71980  | 0.08794  |
|                          | C | 2.29900  | -2.28241 | 0.22167  |                          | C | -3.44480 | 1.44634  | -0.19676 |
|                          | C | 3.65608  | -2.01184 | 0.33486  |                          | C | -4.65847 | 0.80426  | -0.34807 |
|                          | C | 4.07969  | -0.68804 | 0.26924  |                          | C | -4.70812 | -0.58426 | -0.20994 |
|                          | H | 3.55331  | 1.38591  | 0.03024  |                          | H | -3.62126 | -2.39951 | 0.17466  |
|                          | H | 1.09761  | 0.87351  | -0.18043 |                          | H | -1.44958 | -1.24081 | 0.44720  |

|                          |   |          |          |          |                        |    |          |          |          |
|--------------------------|---|----------|----------|----------|------------------------|----|----------|----------|----------|
|                          | H | 1.92802  | -3.30186 | 0.26826  |                        | H  | -3.37377 | 2.52542  | -0.29580 |
|                          | H | 4.37563  | -2.81068 | 0.47375  |                        | H  | -5.56041 | 1.36419  | -0.56786 |
|                          | O | 0.08069  | -1.56514 | -0.15617 |                        | O  | -1.16229 | 1.47412  | 0.17763  |
|                          | N | 5.50319  | -0.39647 | 0.38879  |                        | N  | -5.97189 | -1.26832 | -0.36492 |
|                          | O | 6.28305  | -1.33704 | 0.53805  |                        | O  | -6.97839 | -0.60062 | -0.62024 |
|                          | O | 5.86603  | 0.77843  | 0.33553  |                        | O  | -6.00117 | -2.49574 | -0.23701 |
|                          | C | -0.91015 | -1.12936 | 0.68418  |                        | C  | 0.12389  | 0.98218  | 0.64477  |
|                          | C | -2.22760 | -1.65040 | 0.22624  |                        | C  | 1.04991  | 2.18466  | 0.41381  |
|                          | C | -3.39150 | -1.33802 | 0.93730  |                        | C  | 2.06067  | 2.52374  | 1.30987  |
|                          | C | -2.32798 | -2.45853 | -0.91385 |                        | C  | 0.92505  | 2.92764  | -0.76766 |
|                          | C | -4.62751 | -1.82070 | 0.51835  |                        | C  | 2.92923  | 3.58296  | 1.03976  |
|                          | H | -3.31565 | -0.71250 | 1.81924  |                        | H  | 2.15498  | 1.94863  | 2.22463  |
|                          | C | -3.56463 | -2.94785 | -1.32675 |                        | C  | 1.78475  | 3.98808  | -1.03804 |
|                          | H | -1.43600 | -2.70978 | -1.47648 |                        | H  | 0.14839  | 2.67129  | -1.48109 |
|                          | C | -4.72040 | -2.62970 | -0.61437 |                        | C  | 2.79470  | 4.32110  | -0.13309 |
|                          | H | -5.52310 | -1.56580 | 1.07950  |                        | H  | 3.71309  | 3.83084  | 1.75153  |
|                          | H | -3.62544 | -3.58050 | -2.20877 |                        | H  | 1.66900  | 4.55579  | -1.95825 |
|                          | H | -5.68572 | -3.01083 | -0.93825 |                        | H  | 3.46854  | 5.14824  | -0.34291 |
|                          | S | -0.58741 | -0.65665 | 2.25313  |                        | S  | 0.07196  | 0.32337  | 2.30025  |
|                          | C | -2.15862 | 2.64297  | -0.61046 |                        | O  | 0.44058  | -0.00577 | -0.40613 |
|                          | C | -1.44997 | 2.95263  | -1.89666 |                        | C  | 1.62407  | -0.70150 | -0.33560 |
|                          | H | -0.36404 | 2.93420  | -1.75567 |                        | C  | 2.76347  | -0.20709 | -0.97245 |
|                          | H | -1.67622 | 2.19539  | -2.65473 |                        | C  | 1.66615  | -1.95161 | 0.28462  |
|                          | H | -1.74771 | 3.93391  | -2.26605 |                        | C  | 3.94228  | -0.94985 | -0.98350 |
|                          | N | -1.97514 | 1.51679  | 0.03997  |                        | H  | 2.72342  | 0.75835  | -1.46603 |
|                          | O | -1.15051 | 0.67404  | -0.49670 |                        | C  | 2.83920  | -2.70168 | 0.27482  |
|                          | C | -3.09768 | 3.60083  | -0.02945 |                        | H  | 0.77696  | -2.33119 | 0.77453  |
|                          | O | -3.31355 | 4.69644  | -0.57051 |                        | C  | 3.96858  | -2.19019 | -0.35615 |
|                          | C | -3.84251 | 3.26084  | 1.24440  |                        | H  | 4.82803  | -0.56720 | -1.48224 |
|                          | H | -3.72713 | 4.08964  | 1.94792  |                        | H  | 2.87220  | -3.67643 | 0.75292  |
|                          | H | -4.90832 | 3.18256  | 1.00872  |                        | Cl | 5.44935  | -3.13356 | -0.37140 |
|                          | H | -3.50474 | 2.33063  | 1.69585  |                        |    |          |          |          |
| <b>TS<sub>2dae</sub></b> | C | -3.79219 | 0.99692  | 0.60646  | <b>P<sub>dae</sub></b> | C  | -1.56922 | 0.93510  | -1.00171 |
|                          | C | -2.41587 | 0.94097  | 0.55801  |                        | C  | -1.23997 | 2.37519  | -0.87487 |
|                          | C | -1.74711 | 0.40629  | -0.58107 |                        | C  | -0.22311 | 2.94183  | -1.65640 |
|                          | C | -2.55747 | -0.07595 | -1.65296 |                        | C  | -1.94106 | 3.18981  | 0.02840  |
|                          | C | -3.93045 | -0.01829 | -1.60205 |                        | C  | 0.08601  | 4.29120  | -1.53811 |
|                          | C | -4.55816 | 0.52106  | -0.46751 |                        | H  | 0.32145  | 2.31627  | -2.35583 |
|                          | H | -4.29320 | 1.40986  | 1.47544  |                        | C  | -1.62834 | 4.54012  | 0.14359  |
|                          | H | -1.83344 | 1.29781  | 1.39583  |                        | H  | -2.72984 | 2.76608  | 0.63944  |

|                               |    |          |          |          |                               |    |          |          |          |
|-------------------------------|----|----------|----------|----------|-------------------------------|----|----------|----------|----------|
|                               | H  | -2.05478 | -0.48924 | -2.52287 |                               | C  | -0.61539 | 5.09444  | -0.63802 |
|                               | H  | -4.53217 | -0.38482 | -2.42660 |                               | H  | 0.87618  | 4.71900  | -2.14919 |
|                               | O  | -0.45500 | 0.33899  | -0.71648 |                               | H  | -2.17715 | 5.16187  | 0.84582  |
|                               | N  | -5.98168 | 0.58447  | -0.40740 |                               | H  | -0.37254 | 6.15009  | -0.54642 |
|                               | O  | -6.64503 | 0.16100  | -1.36720 |                               | C  | -4.14232 | -1.05257 | -0.89294 |
|                               | O  | -6.52323 | 1.06119  | 0.60249  |                               | C  | -3.06299 | -0.69905 | -0.09598 |
|                               | C  | 0.83103  | 0.69236  | 0.59757  |                               | C  | -2.52293 | -1.57493 | 0.83482  |
|                               | C  | 0.72087  | 2.19978  | 0.60354  |                               | C  | -3.06880 | -2.84921 | 0.96277  |
|                               | C  | 0.40228  | 2.89969  | 1.76667  |                               | C  | -4.14495 | -3.21197 | 0.15843  |
|                               | C  | 0.96654  | 2.91922  | -0.57312 |                               | C  | -4.68968 | -2.32644 | -0.76654 |
|                               | C  | 0.32404  | 4.29264  | 1.75865  |                               | H  | -4.55080 | -0.34123 | -1.60506 |
|                               | H  | 0.22124  | 2.34362  | 2.68071  |                               | H  | -1.68479 | -1.26558 | 1.45271  |
|                               | C  | 0.88842  | 4.30753  | -0.58298 |                               | H  | -2.66092 | -3.55012 | 1.68491  |
|                               | H  | 1.21044  | 2.38309  | -1.48384 |                               | H  | -5.53444 | -2.62328 | -1.38087 |
|                               | C  | 0.56584  | 5.00179  | 0.58512  |                               | Cl | -4.83317 | -4.81286 | 0.31958  |
|                               | H  | 0.07597  | 4.82266  | 2.67486  |                               | O  | -2.57173 | 0.60712  | -0.16154 |
|                               | H  | 1.07779  | 4.85205  | -1.50477 |                               | S  | -0.84028 | -0.13667 | -2.00882 |
|                               | H  | 0.50507  | 6.08728  | 0.57759  |                               |    |          |          |          |
|                               | S  | 0.51542  | -0.25007 | 1.98497  |                               |    |          |          |          |
|                               | O  | 1.89206  | 0.36990  | -0.22384 |                               |    |          |          |          |
|                               | C  | 2.35354  | -0.93023 | -0.34085 |                               |    |          |          |          |
|                               | C  | 1.56977  | -1.94889 | -0.87744 |                               |    |          |          |          |
|                               | C  | 3.68243  | -1.16119 | -0.00306 |                               |    |          |          |          |
|                               | C  | 2.12109  | -3.21295 | -1.06205 |                               |    |          |          |          |
|                               | H  | 0.53923  | -1.74297 | -1.13990 |                               |    |          |          |          |
|                               | C  | 4.24012  | -2.42440 | -0.19065 |                               |    |          |          |          |
|                               | H  | 4.27813  | -0.35093 | 0.40735  |                               |    |          |          |          |
|                               | C  | 3.45046  | -3.43993 | -0.71620 |                               |    |          |          |          |
|                               | H  | 1.51948  | -4.01566 | -1.47856 |                               |    |          |          |          |
|                               | H  | 5.27714  | -2.61180 | 0.07170  |                               |    |          |          |          |
|                               | Cl | 4.14194  | -5.03444 | -0.95472 |                               |    |          |          |          |
| <b>2d</b> ··3H <sub>2</sub> O | C  | 1.19432  | -0.89711 | 0.78635  | <b>2e</b> ··3H <sub>2</sub> O | O  | -1.48919 | 2.04126  | -0.14229 |
|                               | C  | 2.04627  | 0.05260  | 0.16456  |                               | H  | -1.02185 | 1.16431  | -0.09651 |
|                               | C  | 1.41939  | 1.01589  | -0.66812 |                               | H  | -1.08128 | 2.59699  | 0.54503  |
|                               | C  | 0.04279  | 1.02939  | -0.86409 |                               | O  | -3.06736 | -1.58685 | 0.36512  |
|                               | C  | -0.75617 | 0.07933  | -0.23364 |                               | H  | -2.12173 | -1.25947 | 0.23301  |
|                               | C  | -0.18254 | -0.88415 | 0.59138  |                               | O  | -4.09730 | 1.04428  | 0.40302  |
|                               | H  | 1.63971  | -1.65264 | 1.42945  |                               | H  | -3.24597 | 1.49714  | 0.22488  |
|                               | H  | 2.04125  | 1.75961  | -1.16081 |                               | H  | -3.29455 | -2.08239 | -0.44095 |
|                               | H  | -0.40838 | 1.78015  | -1.50805 |                               | H  | -3.86179 | 0.09078  | 0.40585  |

|                                             |                              |                                             |                              |
|---------------------------------------------|------------------------------|---------------------------------------------|------------------------------|
|                                             | H -0.80906 -1.62520 1.08151  |                                             | C 2.56073 -1.76789 -0.68185  |
|                                             | Cl -2.50347 0.09614 -0.48185 |                                             | O 3.71917 -1.37337 -0.86047  |
|                                             | O 3.34728 0.03693 0.34688    |                                             | C 2.24856 -3.24707 -0.77222  |
|                                             | H 4.06890 -0.70980 1.61716   |                                             | H 3.17462 -3.78895 -0.96909  |
|                                             | O 4.64002 -1.06736 2.36383   |                                             | H 1.79491 -3.60740 0.15319   |
|                                             | H 4.13135 -0.92153 3.18064   |                                             | H 1.53024 -3.44114 -1.57192  |
|                                             | O 6.66287 0.87620 1.95813    |                                             | C 1.47639 -0.82103 -0.38522  |
|                                             | H 5.41616 1.88311 -1.00371   |                                             | C 1.75263 0.64985 -0.28510   |
|                                             | H 6.03778 0.15758 2.19575    |                                             | H 2.81764 0.84155 -0.41581   |
|                                             | H 6.21049 1.34519 1.22383    |                                             | H 1.19582 1.20893 -1.04405   |
|                                             | O 5.06848 1.98463 -0.10037   |                                             | H 1.43480 1.03616 0.68906    |
|                                             | H 4.35004 1.28805 -0.00224   |                                             | N 0.29505 -1.34849 -0.21425  |
|                                             |                              |                                             | O -0.69265 -0.51448 0.05267  |
| <b>TS1<sub>dab</sub> ···3H<sub>2</sub>O</b> | C 3.47640 -1.62506 -0.53403  | <b>TS1<sub>dae</sub> ···3H<sub>2</sub>O</b> | C -3.55194 2.49797 -0.37008  |
|                                             | C 2.28779 -0.91981 -0.43856  |                                             | C -2.22661 2.38790 0.02627   |
|                                             | C 2.31745 0.47769 -0.45309   |                                             | C -1.58646 1.15037 -0.02828  |
|                                             | C 3.52875 1.16600 -0.55362   |                                             | C -2.25471 0.01125 -0.48298  |
|                                             | C 4.72091 0.46462 -0.64828   |                                             | C -3.57866 0.11544 -0.87798  |
|                                             | C 4.67930 -0.92724 -0.64104  |                                             | C -4.21182 1.35655 -0.81552  |
|                                             | H 3.47850 -2.70919 -0.51922  |                                             | H -4.06887 3.45016 -0.33327  |
|                                             | H 1.33767 -1.42507 -0.33526  |                                             | H -1.67818 3.25499 0.38213   |
|                                             | H 3.52075 2.25196 -0.55913   |                                             | H -1.72321 -0.93127 -0.52318 |
|                                             | H 5.66908 0.98364 -0.73046   |                                             | H -4.11989 -0.75213 -1.23847 |
|                                             | O 1.20670 1.25484 -0.28353   |                                             | O -0.25131 1.13989 0.28662   |
|                                             | N 5.92426 -1.67226 -0.74145  |                                             | N -5.60332 1.46302 -1.23308  |
|                                             | O 6.98016 -1.04307 -0.82378  |                                             | O -6.17828 0.44528 -1.61940  |
|                                             | O 5.87364 -2.90301 -0.74020  |                                             | O -6.14734 2.56637 -1.18287  |
|                                             | C 0.00274 1.01508 -0.93213   |                                             | C 0.28653 0.27084 1.21164    |
|                                             | C -0.96937 2.08581 -0.52751  |                                             | C 1.75014 0.53953 1.34752    |
|                                             | C -2.19191 2.21505 -1.19276  |                                             | C 2.49819 -0.13055 2.32059   |
|                                             | C -0.68222 2.96093 0.52866   |                                             | C 2.39933 1.44648 0.50019    |
|                                             | C -3.10697 3.19532 -0.81587  |                                             | C 3.86339 0.10704 2.45219    |
|                                             | H -2.41493 1.54583 -2.01626  |                                             | H 1.99668 -0.83640 2.97235   |
|                                             | C -1.59455 3.94482 0.89994   |                                             | C 3.76429 1.68595 0.63556    |
|                                             | H 0.25771 2.87510 1.06052    |                                             | H 1.84002 1.96377 -0.26992   |
|                                             | C -2.81271 4.06688 0.23108   |                                             | C 4.50271 1.01909 1.61269    |
|                                             | H -4.05298 3.27902 -1.34504  |                                             | H 4.43084 -0.42184 3.21398   |
|                                             | H -1.35199 4.62061 1.71670   |                                             | H 4.25220 2.39554 -0.02790   |
|                                             | H -3.52411 4.83570 0.52242   |                                             | H 5.56845 1.20710 1.71776    |
|                                             | S -0.00295 0.35074 -2.49247  |                                             | S -0.65401 -0.35329 2.45897  |

|                                              |                               |                                              |                              |
|----------------------------------------------|-------------------------------|----------------------------------------------|------------------------------|
|                                              | C -1.66357 -2.11345 -0.77140  |                                              | C 1.86619 -4.47720 0.20410   |
|                                              | C -1.70096 -0.97435 0.05620   |                                              | O 2.01540 -5.52268 -0.43402  |
|                                              | C -2.94705 -0.58499 0.58687   |                                              | C 2.38145 -4.37284 1.62192   |
|                                              | C -4.10336 -1.31029 0.31972   |                                              | H 3.20433 -3.65480 1.66944   |
|                                              | C -4.03024 -2.43376 -0.49907  |                                              | H 1.60774 -4.00476 2.29755   |
|                                              | C -2.81851 -2.84076 -1.04707  |                                              | H 2.73289 -5.35451 1.94213   |
|                                              | H -0.71268 -2.42921 -1.18716  |                                              | C 1.20485 -3.30824 -0.41115  |
|                                              | H -2.99545 0.29645 1.22003    |                                              | N 1.09117 -2.26538 0.35511   |
|                                              | H -5.05541 -1.00326 0.74404   |                                              | O 0.53353 -1.19912 -0.17864  |
|                                              | H -2.77399 -3.72216 -1.68106  |                                              | O 1.11377 -0.04933 -2.64518  |
|                                              | Cl -5.49075 -3.35610 -0.83841 |                                              | H 0.28561 -0.15500 -3.14667  |
|                                              | O -0.58809 -0.29294 0.34036   |                                              | H 0.94333 -0.46093 -1.76363  |
|                                              | H 1.65343 4.88852 2.37906     |                                              | O 1.36617 4.40182 -1.65680   |
|                                              | O 2.35036 4.21910 2.24348     |                                              | H 1.81184 4.65207 -0.82559   |
|                                              | H 2.55925 4.25521 1.29101     |                                              | H 0.42772 4.28144 -1.41747   |
|                                              | O 2.16397 1.68850 3.56907     |                                              | C 0.71501 -3.37464 -1.82792  |
|                                              | H 1.31022 1.27365 3.31712     |                                              | H 1.30708 -2.72906 -2.48406  |
|                                              | H 2.19942 2.54147 3.09445     |                                              | H 0.77348 -4.39869 -2.19673  |
|                                              | O -0.29497 0.49779 2.91433    |                                              | H -0.31965 -3.02318 -1.88761 |
|                                              | H -0.41161 0.24029 1.96019    |                                              | O 2.53554 2.31048 -3.21275   |
|                                              | H -1.02384 1.11426 3.10580    |                                              | H 2.13543 3.02602 -2.68039   |
|                                              |                               |                                              | H 2.04736 1.49554 -2.96940   |
| <b>TS1<sub>1abd</sub> ···3H<sub>2</sub>O</b> | C -2.38397 -1.47038 -0.30328  | <b>IN1<sub>1abd</sub> ···3H<sub>2</sub>O</b> | O -0.95204 0.85200 0.02880   |
|                                              | C -2.19690 -0.16388 0.18289   |                                              | C -2.13772 0.18275 0.00794   |
|                                              | C -3.32479 0.54027 0.64252    |                                              | C -2.43352 -0.58151 1.14390  |
|                                              | C -4.59041 -0.03878 0.63086   |                                              | C -3.07445 0.24934 -1.03087  |
|                                              | C -4.74380 -1.33212 0.14196   |                                              | C -3.64461 -1.25589 1.25544  |
|                                              | C -3.64908 -2.05075 -0.32769  |                                              | H -1.70029 -0.64260 1.94351  |
|                                              | H -1.52557 -2.02636 -0.66409  |                                              | C -4.28528 -0.43088 -0.92249 |
|                                              | H -3.19689 1.55407 1.01328    |                                              | H -2.85837 0.81313 -1.92913  |
|                                              | H -5.45101 0.51495 0.99607    |                                              | C -4.56585 -1.17565 0.21691  |
|                                              | H -3.78038 -3.06163 -0.70408  |                                              | H -3.86422 -1.84189 2.14335  |
|                                              | Cl -6.34133 -2.06969 0.12216  |                                              | H -5.00912 -0.37575 -1.73071 |
|                                              | O -0.97850 0.39946 0.23054    |                                              | Cl -6.09689 -2.02742 0.34490 |
|                                              | H 1.73118 4.45109 -1.46868    |                                              | C 4.12557 -0.57731 -0.00695  |
|                                              | O 1.75723 4.02819 -0.59026    |                                              | C 3.29140 0.49787 -0.23975   |
|                                              | H 1.49700 3.09723 -0.73603    |                                              | C 1.91808 0.30781 -0.50746   |
|                                              | O -0.22119 4.73177 1.34508    |                                              | C 1.40476 -1.00598 -0.54149  |
|                                              | H -0.34668 3.83431 1.72373    |                                              | C 2.24233 -2.08264 -0.31044  |
|                                              | H 0.47314 4.61380 0.66626     |                                              | C 3.59630 -1.86979 -0.04463  |

|                                            |    |          |          |          |                                            |   |          |          |          |
|--------------------------------------------|----|----------|----------|----------|--------------------------------------------|---|----------|----------|----------|
|                                            | O  | -0.44139 | 2.09515  | 2.28145  |                                            | H | 5.17908  | -0.42691 | 0.20100  |
|                                            | H  | -0.64447 | 1.48105  | 1.52680  |                                            | H | 3.68447  | 1.50958  | -0.21329 |
|                                            | H  | -1.09161 | 1.88900  | 2.97639  |                                            | H | 0.35942  | -1.16975 | -0.75627 |
|                                            | C  | 2.80125  | -1.83534 | 0.18235  |                                            | H | 1.85167  | -3.09404 | -0.33332 |
|                                            | C  | 1.74845  | -0.99638 | -0.14383 |                                            | O | 1.18628  | 1.41153  | -0.69497 |
|                                            | C  | 2.00653  | 0.33826  | -0.49050 |                                            | N | 4.46092  | -2.99895 | 0.19461  |
|                                            | C  | 3.32564  | 0.81750  | -0.49992 |                                            | O | 3.97958  | -4.13593 | 0.15209  |
|                                            | C  | 4.37803  | -0.01793 | -0.16947 |                                            | O | 5.65510  | -2.79156 | 0.43416  |
|                                            | C  | 4.10624  | -1.34377 | 0.16595  |                                            | C | -0.30112 | 1.32591  | -1.27655 |
|                                            | H  | 2.61647  | -2.86805 | 0.45649  |                                            | O | -0.42182 | 0.55408  | -2.24848 |
|                                            | H  | 0.73012  | -1.35444 | -0.12151 |                                            | C | -0.63831 | 2.80443  | -1.41083 |
|                                            | H  | 3.51156  | 1.85317  | -0.76790 |                                            | H | -0.05993 | 3.22965  | -2.23446 |
|                                            | H  | 5.39938  | 0.34568  | -0.17504 |                                            | H | -1.69927 | 2.89608  | -1.65423 |
|                                            | O  | 1.04019  | 1.24221  | -0.78487 |                                            | H | -0.43693 | 3.36319  | -0.49534 |
|                                            | N  | 5.20298  | -2.22773 | 0.50831  |                                            | H | 2.54966  | 4.40861  | -1.07254 |
|                                            | O  | 6.34996  | -1.77501 | 0.49750  |                                            | O | 2.50484  | 3.87394  | -0.25843 |
|                                            | O  | 4.94845  | -3.39910 | 0.79746  |                                            | H | 2.02612  | 3.05283  | -0.50149 |
|                                            | C  | -0.25157 | 0.81387  | -1.35564 |                                            | O | 0.84394  | 4.77547  | 1.86579  |
|                                            | O  | -0.25235 | -0.16044 | -2.10951 |                                            | H | 0.40462  | 3.92690  | 2.08392  |
|                                            | C  | -1.01102 | 2.08583  | -1.66438 |                                            | H | 1.45731  | 4.55837  | 1.13415  |
|                                            | H  | -0.59379 | 2.53013  | -2.57353 |                                            | O | -0.37598 | 2.26781  | 2.39665  |
|                                            | H  | -2.05366 | 1.82908  | -1.85582 |                                            | H | -0.53782 | 1.76874  | 1.56628  |
|                                            | H  | -0.96005 | 2.80753  | -0.84887 |                                            | H | -1.24538 | 2.33793  | 2.83180  |
| <b>TS2<sub>dbd</sub> ··3H<sub>2</sub>O</b> | O  | -0.90406 | 1.44581  | 0.64501  | <b>TS1<sub>dbe</sub> ··3H<sub>2</sub>O</b> | C | -2.57274 | -1.53888 | -0.03105 |
|                                            | C  | -1.99036 | 0.64905  | 0.42512  |                                            | C | -1.41808 | -0.83052 | 0.26025  |
|                                            | C  | -2.12193 | -0.46475 | 1.26106  |                                            | C | -1.49361 | 0.55107  | 0.47729  |
|                                            | C  | -2.98229 | 0.91380  | -0.52555 |                                            | C | -2.72333 | 1.21511  | 0.39508  |
|                                            | C  | -3.23167 | -1.29847 | 1.16559  |                                            | C | -3.87805 | 0.51010  | 0.09737  |
|                                            | H  | -1.34406 | -0.67286 | 1.99061  |                                            | C | -3.79079 | -0.86489 | -0.10859 |
|                                            | C  | -4.08971 | 0.07572  | -0.62764 |                                            | H | -2.53376 | -2.60822 | -0.20626 |
|                                            | H  | -2.89128 | 1.76078  | -1.19409 |                                            | H | -0.45899 | -1.32707 | 0.30688  |
|                                            | C  | -4.21015 | -1.02164 | 0.21759  |                                            | H | -2.76339 | 2.28671  | 0.56577  |
|                                            | H  | -3.32767 | -2.15850 | 1.82212  |                                            | H | -4.83596 | 1.01344  | 0.03123  |
|                                            | H  | -4.85886 | 0.28380  | -1.36600 |                                            | O | -0.39943 | 1.32930  | 0.71862  |
|                                            | Cl | -5.61198 | -2.07078 | 0.08427  |                                            | N | -4.99782 | -1.61308 | -0.41527 |
|                                            | C  | 4.29824  | 0.41412  | 0.25275  |                                            | O | -6.06340 | -1.00010 | -0.49965 |
|                                            | C  | 3.39528  | 1.45524  | 0.31712  |                                            | O | -4.90896 | -2.83103 | -0.57901 |
|                                            | C  | 2.02715  | 1.25673  | 0.01455  |                                            | C | 0.70524  | 0.81286  | 1.50029  |
|                                            | C  | 1.59944  | -0.03598 | -0.36650 |                                            | O | 0.49126  | -0.06512 | 2.32433  |
|                                            | C  | 2.50624  | -1.07747 | -0.43311 |                                            | C | 1.70448  | 1.92443  | 1.68840  |

|                                            |   |          |          |          |                                            |   |          |          |          |
|--------------------------------------------|---|----------|----------|----------|--------------------------------------------|---|----------|----------|----------|
|                                            | C | 3.85078  | -0.85573 | -0.12489 |                                            | H | 1.36945  | 2.55990  | 2.51477  |
|                                            | H | 5.34461  | 0.57249  | 0.48925  |                                            | H | 2.66120  | 1.47672  | 1.95711  |
|                                            | H | 3.72583  | 2.44721  | 0.60970  |                                            | H | 1.82261  | 2.53016  | 0.79022  |
|                                            | H | 0.56258  | -0.20727 | -0.61500 |                                            | C | 4.32360  | -2.24734 | 0.01625  |
|                                            | H | 2.17885  | -2.06994 | -0.72291 |                                            | O | 4.93930  | -3.00679 | -0.73465 |
|                                            | O | 1.22187  | 2.30934  | 0.12562  |                                            | C | 4.75527  | -2.08292 | 1.45589  |
|                                            | N | 4.78683  | -1.94669 | -0.19678 |                                            | H | 5.12000  | -1.06661 | 1.62546  |
|                                            | O | 4.37729  | -3.06234 | -0.53767 |                                            | H | 3.91773  | -2.23476 | 2.13859  |
|                                            | O | 5.97177  | -1.73350 | 0.08472  |                                            | H | 5.55232  | -2.79658 | 1.66793  |
|                                            | C | -0.32984 | 2.27423  | -0.47911 |                                            | C | 3.16406  | -1.47580 | -0.48264 |
|                                            | O | -0.39764 | 1.78111  | -1.61576 |                                            | N | 2.58070  | -0.72231 | 0.39703  |
|                                            | C | -0.72285 | 3.71816  | -0.21626 |                                            | O | 1.54990  | -0.00772 | -0.03510 |
|                                            | H | -0.17051 | 4.37147  | -0.89506 |                                            | O | 1.77674  | 1.69765  | -2.18340 |
|                                            | H | -1.78992 | 3.82496  | -0.42746 |                                            | H | 1.10789  | 1.42008  | -2.83487 |
|                                            | H | -0.53634 | 4.01718  | 0.81622  |                                            | H | 1.70001  | 1.05712  | -1.43243 |
|                                            | H | 2.31070  | 5.38409  | 0.55084  |                                            | O | -0.64437 | 4.16969  | 0.19321  |
|                                            | O | 2.36284  | 4.64518  | 1.18458  |                                            | H | -0.55945 | 3.22894  | 0.44162  |
|                                            | H | 1.94350  | 3.87621  | 0.73877  |                                            | H | -0.65460 | 4.66492  | 1.03351  |
|                                            | O | 0.75221  | 4.73282  | 3.52152  |                                            | C | 2.72868  | -1.60725 | -1.91201 |
|                                            | H | 0.40516  | 3.81671  | 3.49198  |                                            | H | 2.97610  | -0.70857 | -2.48586 |
|                                            | H | 1.34083  | 4.80075  | 2.74175  |                                            | H | 3.21921  | -2.46279 | -2.37632 |
|                                            | O | -0.19703 | 2.06469  | 3.31037  |                                            | H | 1.64300  | -1.72964 | -1.96345 |
|                                            | H | -0.39541 | 1.84899  | 2.37378  |                                            | O | 1.65089  | 4.41689  | -1.48735 |
|                                            | H | -1.02576 | 1.89916  | 3.79622  |                                            | H | 0.86194  | 4.44626  | -0.91001 |
|                                            |   |          |          |          |                                            | H | 1.72543  | 3.47569  | -1.75561 |
| <b>IN1<sub>dbe</sub>...3H<sub>2</sub>O</b> | C | 2.57273  | -1.58917 | -0.15539 | <b>TS2<sub>dbe</sub>...3H<sub>2</sub>O</b> | C | 2.65049  | -1.59326 | -0.14504 |
|                                            | C | 1.42292  | -0.89030 | -0.47970 |                                            | C | 1.47733  | -0.89258 | -0.34846 |
|                                            | C | 1.41949  | 0.51757  | -0.43084 |                                            | C | 1.48207  | 0.52286  | -0.37802 |
|                                            | C | 2.59661  | 1.19595  | -0.05530 |                                            | C | 2.71592  | 1.19551  | -0.19688 |
|                                            | C | 3.74296  | 0.49755  | 0.27142  |                                            | C | 3.88633  | 0.49547  | 0.01205  |
|                                            | C | 3.72597  | -0.89764 | 0.21820  |                                            | C | 3.85324  | -0.90303 | 0.03435  |
|                                            | H | 2.58146  | -2.67313 | -0.18637 |                                            | H | 2.64490  | -2.67741 | -0.11712 |
|                                            | H | 0.52744  | -1.41872 | -0.77117 |                                            | H | 0.54426  | -1.42214 | -0.48188 |
|                                            | H | 2.58897  | 2.28106  | -0.01994 |                                            | H | 2.72514  | 2.28110  | -0.21779 |
|                                            | H | 4.64672  | 1.02032  | 0.56400  |                                            | H | 4.82661  | 1.01677  | 0.15395  |
|                                            | O | 0.34748  | 1.28381  | -0.69261 |                                            | O | 0.38796  | 1.25186  | -0.54249 |
|                                            | N | 4.92011  | -1.63597 | 0.55785  |                                            | N | 5.06981  | -1.63885 | 0.24842  |
|                                            | O | 5.92899  | -1.00803 | 0.89325  |                                            | O | 6.12406  | -1.01313 | 0.41349  |
|                                            | O | 4.89134  | -2.86905 | 0.50158  |                                            | O | 5.02569  | -2.87501 | 0.26091  |
|                                            | C | -0.89626 | 0.70813  | -1.44525 |                                            | C | -0.99047 | 0.59979  | -1.40951 |

|   |          |          |          |   |          |          |          |
|---|----------|----------|----------|---|----------|----------|----------|
| O | -0.63645 | -0.05503 | -2.39485 | O | -0.65844 | -0.15435 | -2.32161 |
| C | -1.76016 | 1.94193  | -1.65160 | C | -1.73589 | 1.89491  | -1.64416 |
| H | -1.32136 | 2.55371  | -2.44367 | H | -1.22296 | 2.46664  | -2.41958 |
| H | -2.74719 | 1.60926  | -1.97779 | H | -2.73679 | 1.64169  | -2.00207 |
| H | -1.86468 | 2.54014  | -0.74467 | H | -1.82305 | 2.49546  | -0.73829 |
| C | -4.39321 | -2.09195 | 0.05815  | C | -4.56066 | -1.96749 | 0.15900  |
| O | -4.92871 | -2.83230 | 0.87607  | O | -5.10327 | -2.67639 | 0.99749  |
| C | -5.00605 | -1.85043 | -1.29851 | C | -5.20517 | -1.69058 | -1.17507 |
| H | -5.25092 | -0.79284 | -1.42194 | H | -5.38140 | -0.61930 | -1.29736 |
| H | -4.30024 | -2.10536 | -2.09176 | H | -4.54746 | -1.99777 | -1.99105 |
| H | -5.90953 | -2.45361 | -1.39051 | H | -6.14994 | -2.23157 | -1.23034 |
| C | -3.11009 | -1.40789 | 0.40745  | C | -3.22552 | -1.35599 | 0.46309  |
| N | -2.63357 | -0.65739 | -0.52132 | N | -2.74437 | -0.63423 | -0.48286 |
| O | -1.48393 | -0.02332 | -0.17824 | O | -1.53675 | -0.06980 | -0.17008 |
| O | -1.37145 | 1.62900  | 2.17552  | O | -1.19856 | 1.52948  | 2.25532  |
| H | -0.55510 | 1.40432  | 2.65897  | H | -0.31593 | 1.40377  | 2.65037  |
| H | -1.35655 | 1.07315  | 1.36842  | H | -1.17554 | 1.03144  | 1.41389  |
| O | 0.69180  | 4.09036  | -0.37905 | O | 0.67020  | 4.01452  | -0.26639 |
| H | 0.54941  | 3.14306  | -0.58589 | H | 0.56801  | 3.04843  | -0.43067 |
| H | 0.64697  | 4.55998  | -1.23246 | H | 0.61406  | 4.44160  | -1.14063 |
| C | -2.48248 | -1.63181 | 1.74931  | C | -2.56322 | -1.61627 | 1.78035  |
| H | -2.57225 | -0.73775 | 2.37370  | H | -2.51253 | -0.69981 | 2.37536  |
| H | -2.96978 | -2.46447 | 2.25536  | H | -3.11791 | -2.37294 | 2.33363  |
| H | -1.41530 | -1.83850 | 1.63456  | H | -1.53488 | -1.95238 | 1.62263  |
| O | -1.40949 | 4.38910  | 1.51734  | O | -1.48398 | 4.27242  | 1.55933  |
| H | -0.69075 | 4.41783  | 0.85346  | H | -0.75116 | 4.32674  | 0.91142  |
| H | -1.44794 | 3.44860  | 1.78964  | H | -1.45656 | 3.34276  | 1.86676  |

**S11** The optimized geometries for the transition states and minima of the reaction in **Table1**, obtained with CAM-B3LYP+IDSCRF/DZVP.

| Species                            | Cartesian coordinates |         |          | Species  | Cartesian coordinates              |   |          |          |         |
|------------------------------------|-----------------------|---------|----------|----------|------------------------------------|---|----------|----------|---------|
| <b>2d</b> ··3H <sub>2</sub> O1DMSO | C                     | 1.96153 | -0.34535 | 1.54777  | <b>2e</b> ··3H <sub>2</sub> O1DMSO | C | -4.16152 | -0.32354 | 0.86194 |
|                                    | C                     | 1.34358 | 0.60664  | 0.69289  |                                    | O | -4.97552 | 0.46575  | 1.35934 |
|                                    | C                     | 1.95077 | 0.79900  | -0.57787 |                                    | C | -4.39663 | -1.81539 | 0.98424 |
|                                    | C                     | 3.08793 | 0.09571  | -0.96078 |                                    | H | -5.37211 | -1.97944 | 1.44442 |
|                                    | C                     | 3.65986 | -0.82732 | -0.08933 |                                    | H | -4.35224 | -2.30488 | 0.01001 |
|                                    | C                     | 3.09788 | -1.04934 | 1.16523  |                                    | H | -3.62055 | -2.27277 | 1.60308 |
|                                    | H                     | 1.52456 | -0.51847 | 2.52848  |                                    | C | -2.96487 | 0.16166  | 0.16501 |
|                                    | H                     | 1.50786 | 1.51728  | -1.26383 |                                    | C | -2.70449 | 1.63330  | 0.02877 |



|                                                  |    |          |          |          |                                                  |   |          |          |          |
|--------------------------------------------------|----|----------|----------|----------|--------------------------------------------------|---|----------|----------|----------|
|                                                  | H  | 3.52958  | 0.26619  | -1.93963 |                                                  | H | -3.57548 | 2.20064  | 0.35772  |
|                                                  | H  | 3.54704  | -1.77031 | 1.84388  |                                                  | H | -1.84012 | 1.94417  | 0.62509  |
|                                                  | Cl | 5.10400  | -1.71932 | -0.57637 |                                                  | H | -2.47332 | 1.88274  | -1.01139 |
|                                                  | O  | 0.27589  | 1.27174  | 1.06385  |                                                  | N | -2.17510 | -0.76063 | -0.32052 |
|                                                  | H  | -1.03153 | 0.41442  | 1.85227  |                                                  | O | -1.09193 | -0.34102 | -0.94421 |
|                                                  | O  | -1.86329 | -0.00763 | 2.18725  |                                                  | H | 0.07412  | -1.58125 | -1.26544 |
|                                                  | H  | -2.49868 | 0.09119  | 1.45284  |                                                  | O | 0.84751  | -2.18368 | -1.42618 |
|                                                  | O  | -1.41767 | 2.27598  | -0.72132 |                                                  | H | 1.60849  | -1.70065 | -1.05179 |
|                                                  | H  | -0.72579 | 1.93500  | -0.07869 |                                                  | O | 0.79594  | 1.41677  | -0.11206 |
|                                                  | H  | -2.19089 | 1.68504  | -0.59756 |                                                  | H | 0.01113  | 0.86931  | -0.37914 |
|                                                  | S  | -3.91457 | -0.60843 | -1.16988 |                                                  | H | 1.56055  | 0.80055  | -0.13197 |
|                                                  | O  | -3.48926 | 0.45729  | -0.14365 |                                                  | S | 3.65283  | -0.83462 | 1.05004  |
|                                                  | C  | -5.66422 | -0.89754 | -0.84261 |                                                  | O | 2.84297  | -0.49836 | -0.21574 |
|                                                  | H  | -6.19902 | 0.01133  | -1.12120 |                                                  | C | 5.26297  | -1.37208 | 0.44174  |
|                                                  | H  | -6.01421 | -1.73296 | -1.45282 |                                                  | H | 5.74968  | -0.50009 | 0.00314  |
|                                                  | H  | -5.79933 | -1.10515 | 0.22061  |                                                  | H | 5.85941  | -1.74623 | 1.27663  |
|                                                  | C  | -3.27200 | -2.16959 | -0.53249 |                                                  | H | 5.11908  | -2.14573 | -0.31493 |
|                                                  | H  | -3.63086 | -2.98816 | -1.16015 |                                                  | C | 3.03574  | -2.43833 | 1.60099  |
|                                                  | H  | -2.18382 | -2.11628 | -0.58192 |                                                  | H | 3.64385  | -2.78784 | 2.43813  |
|                                                  | H  | -3.59484 | -2.29875 | 0.50225  |                                                  | H | 2.00561  | -2.29322 | 1.92843  |
|                                                  | O  | -0.38895 | 2.29383  | -3.25063 |                                                  | H | 3.06935  | -3.14535 | 0.76999  |
|                                                  | H  | -0.77894 | 2.28859  | -2.33999 |                                                  | O | 1.05132  | 3.82122  | -1.40108 |
|                                                  | H  | -0.14643 | 1.36947  | -3.42795 |                                                  | H | 0.96064  | 2.95292  | -0.93729 |
|                                                  |    |          |          |          |                                                  | H | 0.93575  | 3.61853  | -2.34448 |
| <b>TS1<sub>dad</sub> ···3H<sub>2</sub>O1DMSO</b> | C  | -2.21682 | 2.70931  | 0.08459  | <b>TS1<sub>dae</sub> ···3H<sub>2</sub>O1DMSO</b> | C | 3.70909  | -1.07984 | -1.37936 |
|                                                  | C  | -1.22593 | 1.76797  | -0.14385 |                                                  | C | 2.53417  | -0.38486 | -1.63115 |
|                                                  | C  | -1.43056 | 0.77869  | -1.10970 |                                                  | C | 1.36064  | -0.74336 | -0.96866 |
|                                                  | C  | -2.62048 | 0.72115  | -1.83655 |                                                  | C | 1.34422  | -1.78884 | -0.04290 |
|                                                  | C  | -3.61606 | 1.66071  | -1.61162 |                                                  | C | 2.51478  | -2.48523 | 0.21276  |
|                                                  | C  | -3.39968 | 2.64637  | -0.65251 |                                                  | C | 3.68216  | -2.12398 | -0.45951 |
|                                                  | H  | -2.08381 | 3.48454  | 0.83099  |                                                  | H | 4.63163  | -0.81975 | -1.88602 |
|                                                  | H  | -0.29649 | 1.77104  | 0.41067  |                                                  | H | 2.51392  | 0.43512  | -2.34290 |
|                                                  | H  | -2.75154 | -0.06011 | -2.57918 |                                                  | H | 0.41832  | -2.02859 | 0.46483  |
|                                                  | H  | -4.54548 | 1.63417  | -2.16921 |                                                  | H | 2.53125  | -3.29818 | 0.93004  |
|                                                  | O  | -0.53858 | -0.23605 | -1.32460 |                                                  | O | 0.26381  | 0.04743  | -1.19704 |
|                                                  | N  | -4.43872 | 3.63743  | -0.41070 |                                                  | N | 4.91119  | -2.85950 | -0.18995 |
|                                                  | O  | -5.48192 | 3.56333  | -1.06066 |                                                  | O | 4.87262  | -3.78589 | 0.61944  |
|                                                  | O  | -4.23178 | 4.50887  | 0.43413  |                                                  | O | 5.93631  | -2.52334 | -0.78265 |
|                                                  | C  | 0.80167  | -0.00460 | -1.59805 |                                                  | C | -0.95538 | -0.47473 | -1.57539 |
|                                                  | C  | 1.46827  | -1.32496 | -1.84950 |                                                  | C | -1.92607 | 0.63965  | -1.78994 |

|    |          |          |          |   |          |          |          |
|----|----------|----------|----------|---|----------|----------|----------|
| C  | 2.77949  | -1.37082 | -2.33253 | C | -3.24322 | 0.35360  | -2.16647 |
| C  | 0.80075  | -2.53128 | -1.60024 | C | -1.54656 | 1.97591  | -1.61449 |
| C  | 3.41000  | -2.59101 | -2.56336 | C | -4.16198 | 1.38059  | -2.35873 |
| H  | 3.29695  | -0.43991 | -2.53611 | H | -3.53556 | -0.68087 | -2.30289 |
| C  | 1.42892  | -3.75061 | -1.83836 | C | -2.46594 | 3.00303  | -1.81623 |
| H  | -0.21465 | -2.51697 | -1.22137 | H | -0.52943 | 2.21918  | -1.33130 |
| C  | 2.73755  | -3.78750 | -2.31996 | C | -3.77778 | 2.71099  | -2.18594 |
| H  | 4.43048  | -2.60608 | -2.93803 | H | -5.18287 | 1.14253  | -2.64716 |
| H  | 0.89312  | -4.67711 | -1.64688 | H | -2.15306 | 4.03598  | -1.68562 |
| H  | 3.22711  | -4.74037 | -2.50543 | H | -4.49496 | 3.51322  | -2.34160 |
| S  | 1.26581  | 1.40412  | -2.41741 | S | -1.06252 | -1.94656 | -2.37664 |
| C  | 2.88234  | 1.90037  | 0.55979  | C | -4.44358 | -2.32802 | 1.65625  |
| C  | 2.54856  | 0.53118  | 0.53768  | O | -4.95808 | -2.65460 | 2.72975  |
| C  | 3.56557  | -0.39946 | 0.83392  | C | -5.17309 | -2.58533 | 0.35622  |
| C  | 4.85327  | 0.01599  | 1.15553  | H | -5.47033 | -1.63685 | -0.09900 |
| C  | 5.14766  | 1.37675  | 1.17064  | H | -4.53055 | -3.09137 | -0.36572 |
| C  | 4.17138  | 2.32229  | 0.87510  | H | -6.06127 | -3.18376 | 0.56348  |
| H  | 2.11135  | 2.63031  | 0.33718  | C | -3.12430 | -1.66741 | 1.62406  |
| H  | 3.32484  | -1.45852 | 0.81564  | N | -2.67504 | -1.38244 | 0.43806  |
| H  | 5.62370  | -0.71320 | 1.39121  | O | -1.51188 | -0.77701 | 0.37139  |
| H  | 4.41288  | 3.38162  | 0.89561  | O | -0.61267 | 1.34735  | 1.94729  |
| Cl | 6.77650  | 1.90752  | 1.57869  | H | 0.03741  | 1.86256  | 1.42301  |
| O  | 1.30824  | 0.12834  | 0.26115  | H | -0.89603 | 0.58128  | 1.39466  |
| H  | -2.85206 | -2.85758 | -0.45649 | O | 1.73160  | 3.92384  | -1.68664 |
| O  | -3.43365 | -3.08288 | -1.21684 | H | 1.65117  | 3.53937  | -0.78670 |
| H  | -3.02891 | -2.66450 | -1.99704 | H | 1.85471  | 3.16327  | -2.28081 |
| S  | -3.38096 | -2.07144 | 2.17017  | C | -2.39328 | -1.37133 | 2.90027  |
| O  | -2.24198 | -2.43073 | 1.19047  | H | -2.39613 | -0.29882 | 3.12056  |
| C  | -4.31881 | -0.76766 | 1.34785  | H | -2.86400 | -1.89645 | 3.73170  |
| H  | -5.21010 | -0.54252 | 1.93810  | H | -1.34598 | -1.67565 | 2.81843  |
| H  | -3.67461 | 0.11142  | 1.30412  | S | 2.60250  | 2.88044  | 1.93109  |
| H  | -4.58117 | -1.09864 | 0.34152  | O | 1.48102  | 2.86651  | 0.86958  |
| C  | -4.58182 | -3.40692 | 1.99796  | C | 3.04681  | 1.14698  | 2.15809  |
| H  | -4.12105 | -4.30845 | 2.40384  | H | 3.89344  | 1.07882  | 2.84506  |
| H  | -5.47508 | -3.15865 | 2.57546  | H | 2.17484  | 0.65240  | 2.58817  |
| H  | -4.81811 | -3.54053 | 0.94060  | H | 3.29077  | 0.70762  | 1.18921  |
| O  | 0.33124  | -1.75831 | 1.99253  | C | 4.07794  | 3.42193  | 1.04722  |
| H  | 0.69433  | -1.12768 | 1.31999  | H | 3.92500  | 4.46397  | 0.76424  |
| H  | -0.56232 | -2.01684 | 1.67443  | H | 4.93956  | 3.34225  | 1.71373  |
| O  | 0.13272  | -0.67362 | 4.50614  | H | 4.21286  | 2.80576  | 0.15659  |

|                                                    |    |          |          |          |                                                    |   |          |          |          |
|----------------------------------------------------|----|----------|----------|----------|----------------------------------------------------|---|----------|----------|----------|
|                                                    | H  | 0.21799  | -1.06411 | 3.60173  |                                                    | O | -2.91085 | 2.73515  | 2.59406  |
|                                                    | H  | -0.17020 | 0.23863  | 4.36199  |                                                    | H | -2.07441 | 2.26007  | 2.37404  |
|                                                    |    |          |          |          |                                                    | H | -3.51981 | 2.52458  | 1.86599  |
| <b>2d</b> ···2H <sub>2</sub> O1DMSO                | C  | 1.28530  | -1.43638 | 0.91048  | <b>2e</b> ···2H <sub>2</sub> O1DMSO                | O | -2.60525 | 1.67034  | -0.81589 |
|                                                    | C  | 0.94437  | -0.06101 | 1.02871  |                                                    | H | -1.93634 | 1.22856  | -0.24085 |
|                                                    | C  | 1.75082  | 0.84973  | 0.29243  |                                                    | H | -3.32940 | 1.02083  | -0.90544 |
|                                                    | C  | 2.81322  | 0.42140  | -0.49512 |                                                    | O | -2.90627 | -1.72765 | 0.78374  |
|                                                    | C  | 3.11036  | -0.93673 | -0.57934 |                                                    | H | -2.14320 | -1.09090 | 0.87108  |
|                                                    | C  | 2.34741  | -1.86628 | 0.12228  |                                                    | H | -3.44862 | -1.34940 | 0.06452  |
|                                                    | H  | 0.69163  | -2.16509 | 1.45770  |                                                    | C | 2.46711  | -0.02406 | -0.03525 |
|                                                    | H  | 1.52054  | 1.91070  | 0.35629  |                                                    | O | 3.40936  | 0.70480  | -0.37392 |
|                                                    | H  | 3.41097  | 1.14480  | -1.04432 |                                                    | C | 2.68946  | -1.51709 | 0.09803  |
|                                                    | H  | 2.58186  | -2.92582 | 0.05450  |                                                    | H | 3.74383  | -1.73103 | -0.08311 |
|                                                    | Cl | 4.46033  | -1.48125 | -1.57954 |                                                    | H | 2.40012  | -1.87140 | 1.08902  |
|                                                    | O  | -0.05373 | 0.34437  | 1.77197  |                                                    | H | 2.07572  | -2.06192 | -0.62325 |
|                                                    | H  | -1.41349 | -0.66330 | 2.09101  |                                                    | C | 1.13696  | 0.53124  | 0.23349  |
|                                                    | O  | -2.29065 | -1.11511 | 2.21599  |                                                    | C | 0.88307  | 2.00515  | 0.11143  |
|                                                    | H  | -2.92866 | -0.52599 | 1.76798  |                                                    | H | 1.81744  | 2.53317  | -0.08022 |
|                                                    | O  | -1.74037 | 2.35341  | 1.03269  |                                                    | H | 0.18216  | 2.22138  | -0.70185 |
|                                                    | H  | -1.05063 | 1.68499  | 1.28223  |                                                    | H | 0.42512  | 2.39022  | 1.02804  |
|                                                    | H  | -2.53330 | 1.81904  | 0.83742  |                                                    | N | 0.22045  | -0.33266 | 0.58707  |
|                                                    | S  | -3.77294 | -0.19297 | -0.94367 |                                                    | O | -0.97962 | 0.15135  | 0.83512  |
|                                                    | O  | -3.88266 | 0.49497  | 0.43284  |                                                    | S | -5.90682 | 0.04685  | 0.13083  |
|                                                    | C  | -4.01668 | -1.95282 | -0.61953 |                                                    | O | -4.75740 | -0.25822 | -0.85196 |
|                                                    | H  | -5.05694 | -2.08406 | -0.31789 |                                                    | C | -6.30792 | -1.53576 | 0.90284  |
|                                                    | H  | -3.82811 | -2.51335 | -1.53800 |                                                    | H | -7.04806 | -1.37026 | 1.68913  |
|                                                    | H  | -3.34299 | -2.26055 | 0.18303  |                                                    | H | -6.73434 | -2.17363 | 0.12728  |
|                                                    | C  | -2.00799 | -0.24523 | -1.32434 |                                                    | H | -5.39313 | -1.97624 | 1.30456  |
|                                                    | H  | -1.86473 | -0.79870 | -2.25518 |                                                    | C | -5.12747 | 0.83328  | 1.55846  |
|                                                    | H  | -1.67349 | 0.78548  | -1.44771 |                                                    | H | -4.72198 | 1.78707  | 1.21842  |
|                                                    | H  | -1.46894 | -0.71094 | -0.49793 |                                                    | H | -5.88414 | 1.00062  | 2.32827  |
|                                                    |    |          |          |          |                                                    | H | -4.32402 | 0.18838  | 1.91945  |
| <b>TS1<sub>dad</sub></b> ···2H <sub>2</sub> O1DMSO | C  | -2.17224 | -2.71068 | -0.19060 | <b>IN1<sub>dad</sub></b> ···2H <sub>2</sub> O1DMSO | C | 2.28175  | -2.47533 | -0.92692 |
|                                                    | C  | -1.20340 | -1.73732 | -0.00594 |                                                    | C | 1.19314  | -1.61876 | -0.88527 |
|                                                    | C  | -1.41691 | -0.72971 | 0.93846  |                                                    | C | 1.37329  | -0.25303 | -1.15305 |
|                                                    | C  | -2.59259 | -0.68518 | 1.68819  |                                                    | C | 2.65536  | 0.23705  | -1.45028 |
|                                                    | C  | -3.56632 | -1.65684 | 1.50707  |                                                    | C | 3.74349  | -0.61678 | -1.49166 |
|                                                    | C  | -3.34178 | -2.66017 | 0.56850  |                                                    | C | 3.54665  | -1.97309 | -1.23131 |
|                                                    | H  | -2.03293 | -3.50112 | -0.91971 |                                                    | H | 2.15569  | -3.53240 | -0.72066 |
|                                                    | H  | -0.28294 | -1.72806 | -0.57575 |                                                    | H | 0.21075  | -2.00106 | -0.65197 |

|    |          |          |          |    |          |          |          |
|----|----------|----------|----------|----|----------|----------|----------|
| H  | -2.73064 | 0.11085  | 2.41365  | H  | 2.77671  | 1.29828  | -1.64215 |
| H  | -4.48497 | -1.64141 | 2.08263  | H  | 4.73428  | -0.24344 | -1.72546 |
| O  | -0.54605 | 0.31355  | 1.10415  | O  | 0.39675  | 0.68641  | -1.10382 |
| N  | -4.35799 | -3.68492 | 0.37305  | N  | 4.67890  | -2.87718 | -1.27797 |
| O  | -5.39055 | -3.62114 | 1.04076  | O  | 5.79232  | -2.41355 | -1.53483 |
| O  | -4.14304 | -4.57301 | -0.45212 | O  | 4.48639  | -4.07515 | -1.05865 |
| C  | 0.79272  | 0.11745  | 1.40285  | C  | -1.02796 | 0.37243  | -1.28407 |
| C  | 1.44433  | 1.45687  | 1.57195  | C  | -1.65539 | 1.77433  | -1.24373 |
| C  | 2.73747  | 1.55175  | 2.09417  | C  | -2.07660 | 2.41634  | -2.40832 |
| C  | 0.77916  | 2.63414  | 1.20479  | C  | -1.76393 | 2.45268  | -0.02474 |
| C  | 3.35197  | 2.79195  | 2.25113  | C  | -2.60626 | 3.70507  | -2.35879 |
| H  | 3.25331  | 0.64381  | 2.38645  | H  | -1.99669 | 1.88564  | -3.35090 |
| C  | 1.39054  | 3.87356  | 1.36901  | C  | -2.30090 | 3.73734  | 0.02817  |
| H  | -0.21996 | 2.58071  | 0.78903  | H  | -1.43657 | 1.97684  | 0.89399  |
| C  | 2.68109  | 3.95962  | 1.89222  | C  | -2.72482 | 4.37005  | -1.13952 |
| H  | 4.35851  | 2.84524  | 2.65862  | H  | -2.93109 | 4.18936  | -3.27652 |
| H  | 0.85689  | 4.77755  | 1.08576  | H  | -2.38598 | 4.24587  | 0.98544  |
| H  | 3.15778  | 4.92842  | 2.01972  | H  | -3.14441 | 5.37225  | -1.09924 |
| S  | 1.26962  | -1.23946 | 2.29378  | C  | -3.73272 | -0.48798 | -0.33380 |
| C  | 2.89873  | -1.89589 | -0.64957 | C  | -2.53403 | -0.81055 | 0.30636  |
| C  | 2.56347  | -0.52619 | -0.69829 | C  | -2.54636 | -1.68839 | 1.39434  |
| C  | 3.58988  | 0.38819  | -1.01858 | C  | -3.73964 | -2.23963 | 1.84743  |
| C  | 4.88277  | -0.04248 | -1.29562 | C  | -4.92718 | -1.91115 | 1.20237  |
| C  | 5.17588  | -1.40278 | -1.24232 | C  | -4.92868 | -1.04213 | 0.11833  |
| C  | 4.19269  | -2.33276 | -0.92115 | H  | -3.74302 | 0.17819  | -1.18547 |
| H  | 2.12306  | -2.61465 | -0.40701 | H  | -1.60935 | -1.93501 | 1.88584  |
| H  | 3.35010  | 1.44704  | -1.05421 | H  | -3.74074 | -2.92033 | 2.69377  |
| H  | 5.65871  | 0.67451  | -1.55026 | H  | -5.86076 | -0.79188 | -0.38025 |
| H  | 4.43317  | -3.39205 | -0.88741 | Cl | -6.44013 | -2.60339 | 1.76372  |
| Cl | 6.81190  | -1.95301 | -1.59523 | O  | -1.30619 | -0.29506 | -0.00934 |
| O  | 1.32268  | -0.11121 | -0.46373 | S  | -1.36533 | -0.62766 | -2.71586 |
| H  | -2.77869 | 2.86726  | 0.21732  | O  | 1.74293  | 3.35857  | -0.45990 |
| O  | -3.28383 | 3.11405  | 1.02474  | H  | 1.05128  | 2.76204  | -0.79177 |
| H  | -2.82679 | 2.68474  | 1.76919  | H  | 2.03909  | 2.93526  | 0.37540  |
| O  | 0.29724  | 1.68852  | -2.34832 | O  | 0.16533  | 0.46882  | 2.43613  |
| H  | 0.67162  | 1.10562  | -1.64884 | H  | 0.94028  | 1.03904  | 2.24560  |
| H  | -0.58831 | 1.95204  | -2.02607 | H  | -0.18575 | 0.19789  | 1.56968  |
| S  | -3.48868 | 2.02316  | -2.34682 | S  | 3.84683  | 1.47009  | 2.13164  |
| O  | -2.29001 | 2.41004  | -1.45536 | O  | 2.43075  | 2.03406  | 1.89831  |
| C  | -4.35233 | 0.71960  | -1.44581 | C  | 4.27285  | 1.97594  | 3.80931  |

|                                                  |   |          |          |          |                                                  |   |          |          |          |
|--------------------------------------------------|---|----------|----------|----------|--------------------------------------------------|---|----------|----------|----------|
|                                                  | H | -5.27817 | 0.47456  | -1.97143 |                                                  | H | 5.22121  | 1.51639  | 4.09609  |
|                                                  | H | -3.69506 | -0.15073 | -1.43289 |                                                  | H | 4.37721  | 3.06162  | 3.80204  |
|                                                  | H | -4.55192 | 1.06111  | -0.42870 |                                                  | H | 3.47178  | 1.67678  | 4.48788  |
|                                                  | C | -4.69478 | 3.34504  | -2.11079 |                                                  | C | 3.61548  | -0.29195 | 2.44080  |
|                                                  | H | -4.27633 | 4.24656  | -2.56025 |                                                  | H | 3.26633  | -0.74020 | 1.51039  |
|                                                  | H | -5.62267 | 3.07669  | -2.62077 |                                                  | H | 4.57460  | -0.73034 | 2.72560  |
|                                                  | H | -4.85905 | 3.49209  | -1.04158 |                                                  | H | 2.86944  | -0.42944 | 3.22548  |
| <b>TS2<sub>dad</sub> ···2H<sub>2</sub>O1DMSO</b> | C | 2.24211  | -2.49617 | -0.82091 | <b>TS1<sub>dae</sub> ···2H<sub>2</sub>O1DMSO</b> | C | 3.46735  | -1.02514 | -1.55360 |
|                                                  | C | 1.22777  | -1.57947 | -0.62201 |                                                  | C | 2.33520  | -0.22775 | -1.65191 |
|                                                  | C | 1.42515  | -0.20596 | -0.91176 |                                                  | C | 1.16958  | -0.59408 | -0.98082 |
|                                                  | C | 2.68689  | 0.19741  | -1.41758 |                                                  | C | 1.11763  | -1.74948 | -0.19868 |
|                                                  | C | 3.70489  | -0.71555 | -1.60863 |                                                  | C | 2.24508  | -2.54870 | -0.09670 |
|                                                  | C | 3.47917  | -2.06484 | -1.31216 |                                                  | C | 3.40533  | -2.17761 | -0.77597 |
|                                                  | H | 2.09297  | -3.54504 | -0.58870 |                                                  | H | 4.38381  | -0.76048 | -2.06883 |
|                                                  | H | 0.27241  | -1.89994 | -0.22617 |                                                  | H | 2.34344  | 0.67925  | -2.24915 |
|                                                  | H | 2.84157  | 1.24896  | -1.63841 |                                                  | H | 0.19815  | -1.99130 | 0.32019  |
|                                                  | H | 4.67047  | -0.40010 | -1.98852 |                                                  | H | 2.23478  | -3.44879 | 0.50777  |
|                                                  | O | 0.49350  | 0.70318  | -0.70413 |                                                  | O | 0.12239  | 0.29098  | -1.03949 |
|                                                  | N | 4.53537  | -3.02075 | -1.51343 |                                                  | N | 4.59041  | -3.01917 | -0.66521 |
|                                                  | O | 5.62881  | -2.62163 | -1.93176 |                                                  | O | 4.52180  | -4.03813 | 0.02159  |
|                                                  | O | 4.31797  | -4.21205 | -1.26208 |                                                  | O | 5.61017  | -2.67534 | -1.26268 |
|                                                  | C | -1.28327 | 0.35148  | -1.19502 |                                                  | C | -1.13404 | -0.08169 | -1.46008 |
|                                                  | C | -1.64631 | 1.80755  | -1.29484 |                                                  | C | -2.03540 | 1.10706  | -1.45089 |
|                                                  | C | -1.64135 | 2.46634  | -2.52876 |                                                  | C | -3.37645 | 0.96904  | -1.82632 |
|                                                  | C | -1.99362 | 2.52744  | -0.14690 |                                                  | C | -1.56398 | 2.37073  | -1.07364 |
|                                                  | C | -1.98415 | 3.81187  | -2.61477 |                                                  | C | -4.22753 | 2.06976  | -1.82431 |
|                                                  | H | -1.37612 | 1.90894  | -3.42090 |                                                  | H | -3.74075 | -0.00883 | -2.11766 |
|                                                  | C | -2.34887 | 3.87197  | -0.23436 |                                                  | C | -2.41517 | 3.47337  | -1.08308 |
|                                                  | H | -1.98958 | 2.03669  | 0.82025  |                                                  | H | -0.52782 | 2.49901  | -0.78417 |
|                                                  | C | -2.34460 | 4.52025  | -1.46736 |                                                  | C | -3.75080 | 3.32806  | -1.45505 |
|                                                  | H | -1.97565 | 4.30971  | -3.58120 |                                                  | H | -5.26780 | 1.94626  | -2.11522 |
|                                                  | H | -2.62500 | 4.41524  | 0.66592  |                                                  | H | -2.03126 | 4.45018  | -0.79955 |
|                                                  | H | -2.62038 | 5.56965  | -1.53579 |                                                  | H | -4.41476 | 4.18901  | -1.46047 |
|                                                  | C | -3.98673 | -0.43687 | -0.36721 |                                                  | S | -1.36156 | -1.39724 | -2.47575 |
|                                                  | C | -2.82688 | -0.70196 | 0.36113  |                                                  | C | -4.69481 | -2.12891 | 1.61927  |
|                                                  | C | -2.88743 | -1.50045 | 1.50517  |                                                  | O | -5.18555 | -2.62969 | 2.63628  |
|                                                  | C | -4.09915 | -2.03717 | 1.92406  |                                                  | C | -5.52825 | -1.99621 | 0.36328  |
|                                                  | C | -5.25106 | -1.77219 | 1.18971  |                                                  | H | -5.68533 | -0.94158 | 0.12372  |
|                                                  | C | -5.20126 | -0.97756 | 0.05128  |                                                  | H | -5.02034 | -2.43961 | -0.49482 |
|                                                  | H | -3.95673 | 0.18003  | -1.25684 |                                                  | H | -6.49083 | -2.48273 | 0.52697  |

|                                                 |                              |                                                 |                              |
|-------------------------------------------------|------------------------------|-------------------------------------------------|------------------------------|
|                                                 | H -1.97550 -1.69219 2.06324  |                                                 | C -3.30553 -1.63918 1.61363  |
|                                                 | H -4.14320 -2.65832 2.81393  |                                                 | N -2.89156 -1.14679 0.48212  |
|                                                 | H -6.10599 -0.77332 -0.51399 |                                                 | O -1.66652 -0.68306 0.45413  |
|                                                 | Cl -6.78435 -2.44906 1.70919 |                                                 | O -0.40088 1.04345 2.31780   |
|                                                 | O -1.58748 -0.18391 0.07719  |                                                 | H 0.12823 1.66564 1.78206    |
|                                                 | S -1.36096 -0.68656 -2.52550 |                                                 | H -0.83752 0.43357 1.68448   |
|                                                 | O 1.74899 3.24343 -0.12892   |                                                 | O 1.88827 4.03506 -1.20056   |
|                                                 | H 1.17827 2.50587 -0.42237   |                                                 | H 1.79196 3.58455 -0.33266   |
|                                                 | H 2.18402 2.89219 0.67586    |                                                 | H 1.81995 3.32955 -1.86695   |
|                                                 | O 0.29413 0.67355 2.36104    |                                                 | C -2.45943 -1.72711 2.84942  |
|                                                 | H 1.16074 1.12892 2.34332    |                                                 | H -2.20496 -0.73237 3.22879  |
|                                                 | H 0.05418 0.55225 1.42512    |                                                 | H -2.98803 -2.27754 3.62785  |
|                                                 | S 4.14952 1.30178 2.14621    |                                                 | H -1.51233 -2.22914 2.62805  |
|                                                 | O 2.78260 2.01222 2.18236    |                                                 | S 2.73341 2.58133 2.28041    |
|                                                 | C 4.88184 1.63072 3.76123    |                                                 | O 1.59282 2.80436 1.26524    |
|                                                 | H 5.80778 1.06039 3.86223    |                                                 | C 3.06430 0.80853 2.23187    |
|                                                 | H 5.10050 2.69841 3.80537    |                                                 | H 3.90274 0.58101 2.89425    |
|                                                 | H 4.16712 1.35831 4.54013    |                                                 | H 2.15609 0.31637 2.58312    |
|                                                 | C 3.78655 -0.44947 2.37901   |                                                 | H 3.28319 0.50957 1.20509    |
|                                                 | H 3.24575 -0.78973 1.49566   |                                                 | C 4.22693 3.15703 1.44887    |
|                                                 | H 4.72646 -0.99815 2.47229   |                                                 | H 4.14466 4.23920 1.34096    |
|                                                 | H 3.16898 -0.57547 3.27041   |                                                 | H 5.09426 2.91228 2.06602    |
|                                                 |                              |                                                 | H 4.29898 2.68578 0.46710    |
| <b>IN1<sub>dae</sub> ··2H<sub>2</sub>O</b> DMSO | C 3.42221 -0.97561 -1.33315  | <b>TS2<sub>dae</sub> ··2H<sub>2</sub>O</b> DMSO | C -1.72303 -0.49491 -1.05526 |
|                                                 | C 2.25164 -0.24880 -1.45537  |                                                 | C -2.34626 0.78443 -1.52729  |
|                                                 | C 1.02583 -0.78855 -1.03465  |                                                 | C -2.64615 0.98190 -2.87872  |
|                                                 | C 0.98328 -2.07808 -0.48471  |                                                 | C -2.64136 1.80464 -0.61480  |
|                                                 | C 2.15458 -2.80763 -0.35995  |                                                 | C -3.23437 2.16777 -3.30920  |
|                                                 | C 3.36334 -2.25600 -0.78295  |                                                 | H -2.42302 0.19126 -3.58733  |
|                                                 | H 4.37040 -0.56362 -1.66017  |                                                 | C -3.23890 2.98682 -1.04374  |
|                                                 | H 2.26119 0.74887 -1.88482   |                                                 | H -2.40004 1.67809 0.43486   |
|                                                 | H 0.04231 -2.49905 -0.16347  |                                                 | C -3.53813 3.17413 -2.39226  |
|                                                 | H 2.13639 -3.80403 0.06733   |                                                 | H -3.46235 2.30469 -4.36330  |
|                                                 | O -0.03023 0.04694 -1.16387  |                                                 | H -3.46653 3.76738 -0.32209  |
|                                                 | N 4.58282 -3.02743 -0.64911  |                                                 | H -4.00450 4.09742 -2.72700  |
|                                                 | O 4.51376 -4.16219 -0.17156  |                                                 | S -1.64179 -1.88178 -1.99735 |
|                                                 | O 5.64452 -2.51949 -1.01752  |                                                 | C -3.33695 -1.27858 1.90234  |
|                                                 | C -1.40400 -0.39163 -1.20535 |                                                 | C -2.25472 -1.21584 2.93356  |
|                                                 | C -2.21260 0.88811 -1.42514  |                                                 | H -1.51745 -2.00307 2.74608  |
|                                                 | C -3.55747 0.80789 -1.79879  |                                                 | H -1.72141 -0.26299 2.87982  |

|                                     |   |          |          |          |                                     |   |          |          |          |
|-------------------------------------|---|----------|----------|----------|-------------------------------------|---|----------|----------|----------|
|                                     | C | -1.65320 | 2.15117  | -1.20926 |                                     | H | -2.67747 | -1.35748 | 3.92734  |
|                                     | C | -4.32332 | 1.95939  | -1.95667 |                                     | N | -3.18556 | -1.03516 | 0.65169  |
|                                     | H | -3.99049 | -0.16949 | -1.97659 |                                     | O | -1.88504 | -0.68239 | 0.35784  |
|                                     | C | -2.41616 | 3.30706  | -1.38045 |                                     | C | -4.73556 | -1.66212 | 2.29264  |
|                                     | H | -0.61280 | 2.24363  | -0.92198 |                                     | O | -4.98035 | -1.92122 | 3.46341  |
|                                     | C | -3.75512 | 3.21761  | -1.75177 |                                     | C | -5.80169 | -1.71820 | 1.22964  |
|                                     | H | -5.36768 | 1.87505  | -2.24764 |                                     | H | -6.74429 | -2.01579 | 1.68908  |
|                                     | H | -1.95602 | 4.27942  | -1.22234 |                                     | H | -5.91143 | -0.74405 | 0.74752  |
|                                     | H | -4.35043 | 4.11781  | -1.88413 |                                     | H | -5.52476 | -2.42879 | 0.44755  |
|                                     | S | -1.72267 | -1.72204 | -2.33559 |                                     | C | 2.25632  | -2.50909 | -0.08999 |
|                                     | C | -4.43671 | -1.85275 | 2.09650  |                                     | C | 1.11486  | -1.73042 | -0.07387 |
|                                     | O | -4.68682 | -2.30076 | 3.20896  |                                     | C | 1.05357  | -0.51785 | -0.80304 |
|                                     | C | -5.52410 | -1.60644 | 1.08247  |                                     | C | 2.18659  | -0.13339 | -1.56199 |
|                                     | H | -5.54486 | -0.55295 | 0.79415  |                                     | C | 3.33159  | -0.90612 | -1.57521 |
|                                     | H | -5.33236 | -2.17690 | 0.17082  |                                     | C | 3.36311  | -2.09519 | -0.83828 |
|                                     | H | -6.48266 | -1.89696 | 1.51293  |                                     | H | 2.30607  | -3.43146 | 0.47832  |
|                                     | C | -3.01810 | -1.53346 | 1.73081  |                                     | H | 0.25462  | -2.03095 | 0.51141  |
|                                     | N | -2.87058 | -1.09171 | 0.53451  |                                     | H | 2.14265  | 0.79552  | -2.12188 |
|                                     | O | -1.57644 | -0.77590 | 0.24135  |                                     | H | 4.19991  | -0.60396 | -2.15046 |
|                                     | O | -0.32625 | 1.18123  | 2.12557  |                                     | O | -0.00885 | 0.26628  | -0.77420 |
|                                     | H | 0.26981  | 1.84024  | 1.71208  |                                     | N | 4.55407  | -2.90489 | -0.85037 |
|                                     | H | -0.63620 | 0.60508  | 1.40542  |                                     | O | 5.52928  | -2.51958 | -1.50549 |
|                                     | O | 1.64457  | 4.10676  | -1.32732 |                                     | O | 4.56420  | -3.95959 | -0.20535 |
|                                     | H | 1.64293  | 3.70171  | -0.43298 |                                     | O | 0.85087  | 2.98479  | -1.32064 |
|                                     | H | 1.57386  | 3.36028  | -1.94737 |                                     | H | 0.38928  | 2.12632  | -1.24461 |
|                                     | C | -1.92240 | -1.74104 | 2.73046  |                                     | H | 1.36111  | 3.05007  | -0.48666 |
|                                     | H | -1.50866 | -0.78236 | 3.05661  |                                     | O | -0.05426 | 1.35960  | 1.99260  |
|                                     | H | -2.30781 | -2.27652 | 3.59733  |                                     | H | 0.71118  | 1.93989  | 1.79930  |
|                                     | H | -1.10335 | -2.30819 | 2.28090  |                                     | H | -0.20951 | 0.87811  | 1.15832  |
|                                     | S | 2.86476  | 2.88752  | 2.14300  |                                     | S | 3.62384  | 2.49463  | 1.28625  |
|                                     | O | 1.63123  | 2.98548  | 1.21926  |                                     | O | 2.15167  | 2.93757  | 1.18175  |
|                                     | C | 3.21120  | 1.12150  | 2.27054  |                                     | C | 4.28864  | 3.42881  | 2.67815  |
|                                     | H | 4.12227  | 0.97557  | 2.85525  |                                     | H | 5.30268  | 3.08527  | 2.89381  |
|                                     | H | 2.35927  | 0.66877  | 2.77983  |                                     | H | 4.31066  | 4.47823  | 2.38167  |
|                                     | H | 3.31453  | 0.70095  | 1.26854  |                                     | H | 3.63698  | 3.29355  | 3.54347  |
|                                     | C | 4.26551  | 3.36197  | 1.11116  |                                     | C | 3.58441  | 0.86654  | 2.06227  |
|                                     | H | 4.15435  | 4.42135  | 0.87722  |                                     | H | 3.11635  | 0.18102  | 1.35533  |
|                                     | H | 5.18928  | 3.20195  | 1.67154  |                                     | H | 4.60825  | 0.54537  | 2.26663  |
|                                     | H | 4.25610  | 2.77089  | 0.19375  |                                     | H | 2.99861  | 0.91733  | 2.98207  |
| <b>2d</b> ··2H <sub>2</sub> O·2DMSO | C | -0.29278 | 0.62640  | -1.35559 | <b>2e</b> ··2H <sub>2</sub> O·2DMSO | C | 3.65832  | -5.71092 | -3.82858 |

|                                                     |    |          |          |          |                                                     |   |          |          |          |
|-----------------------------------------------------|----|----------|----------|----------|-----------------------------------------------------|---|----------|----------|----------|
|                                                     | C  | -0.00051 | -0.12428 | -0.18378 |                                                     | O | 3.89040  | -5.27890 | -4.96518 |
|                                                     | C  | 0.12999  | 0.61926  | 1.02170  |                                                     | C | 4.10809  | -7.10846 | -3.45442 |
|                                                     | C  | -0.02169 | 2.00094  | 1.05246  |                                                     | H | 4.42898  | -7.62748 | -4.35895 |
|                                                     | C  | -0.30927 | 2.69449  | -0.12077 |                                                     | H | 4.94832  | -7.05378 | -2.75645 |
|                                                     | C  | -0.44286 | 2.00862  | -1.32538 |                                                     | H | 3.31643  | -7.66634 | -2.95364 |
|                                                     | H  | -0.40319 | 0.09247  | -2.29601 |                                                     | C | 2.97259  | -4.88452 | -2.82730 |
|                                                     | H  | 0.35368  | 0.07986  | 1.93865  |                                                     | C | 2.54740  | -3.48272 | -3.15409 |
|                                                     | H  | 0.08093  | 2.53953  | 1.99142  |                                                     | H | 2.70859  | -3.27973 | -4.21316 |
|                                                     | H  | -0.66983 | 2.55225  | -2.23924 |                                                     | H | 1.49074  | -3.33592 | -2.91080 |
|                                                     | Cl | -0.50631 | 4.44803  | -0.08040 |                                                     | H | 3.10932  | -2.75254 | -2.56256 |
|                                                     | O  | 0.13929  | -1.42603 | -0.21582 |                                                     | N | 2.76643  | -5.45564 | -1.66994 |
|                                                     | H  | -0.93681 | -2.24182 | -1.32928 |                                                     | O | 2.16185  | -4.72990 | -0.74794 |
|                                                     | O  | -1.61358 | -2.69166 | -1.89684 |                                                     | H | 2.97127  | -3.17419 | -0.27463 |
|                                                     | H  | -2.45316 | -2.23550 | -1.68159 |                                                     | O | 3.50100  | -2.44228 | 0.11831  |
|                                                     | O  | 1.45844  | -2.62256 | 1.85412  |                                                     | H | 4.20702  | -2.90885 | 0.61393  |
|                                                     | H  | 0.92099  | -2.19185 | 1.13975  |                                                     | O | 1.37682  | -6.50398 | 1.20424  |
|                                                     | H  | 2.36601  | -2.29562 | 1.69311  |                                                     | H | 1.70974  | -5.86699 | 0.52062  |
|                                                     | S  | 4.27046  | -1.07716 | -0.24310 |                                                     | H | 0.48498  | -6.75683 | 0.89015  |
|                                                     | O  | 4.00558  | -1.50054 | 1.20854  |                                                     | S | -1.87531 | -5.66162 | -0.24228 |
|                                                     | C  | 3.20753  | -2.11343 | -1.26957 |                                                     | O | -1.22299 | -6.99945 | 0.13552  |
|                                                     | H  | 2.16862  | -1.84919 | -1.04656 |                                                     | C | -3.47071 | -6.10368 | -0.96223 |
|                                                     | H  | 3.43233  | -1.91578 | -2.32061 |                                                     | H | -4.08623 | -6.51614 | -0.16155 |
|                                                     | H  | 3.39206  | -3.16238 | -1.02615 |                                                     | H | -3.94745 | -5.20978 | -1.37025 |
|                                                     | C  | 5.85188  | -1.83716 | -0.67435 |                                                     | H | -3.31433 | -6.85275 | -1.74109 |
|                                                     | H  | 6.05796  | -1.67828 | -1.73507 |                                                     | C | -1.04830 | -5.12693 | -1.75456 |
|                                                     | H  | 6.62155  | -1.35080 | -0.07333 |                                                     | H | -1.54226 | -4.23072 | -2.13790 |
|                                                     | H  | 5.80984  | -2.90299 | -0.44081 |                                                     | H | -0.01089 | -4.90209 | -1.49015 |
|                                                     | S  | -3.91164 | -0.91154 | 0.35985  |                                                     | H | -1.09030 | -5.93642 | -2.48687 |
|                                                     | O  | -3.96825 | -1.29194 | -1.12568 |                                                     | S | 4.47663  | -5.19067 | 2.13929  |
|                                                     | C  | -5.61268 | -1.05787 | 0.94835  |                                                     | O | 5.33969  | -4.08150 | 1.51318  |
|                                                     | H  | -5.87534 | -2.11634 | 0.92150  |                                                     | C | 5.45316  | -5.81244 | 3.52611  |
|                                                     | H  | -5.67880 | -0.68811 | 1.97390  |                                                     | H | 5.49734  | -5.02149 | 4.27622  |
|                                                     | H  | -6.26996 | -0.49057 | 0.28618  |                                                     | H | 4.96518  | -6.69354 | 3.94850  |
|                                                     | C  | -3.78754 | 0.88777  | 0.40138  |                                                     | H | 6.45881  | -6.05526 | 3.17659  |
|                                                     | H  | -3.87193 | 1.23215  | 1.43445  |                                                     | C | 4.64908  | -6.61948 | 1.05496  |
|                                                     | H  | -2.80655 | 1.15268  | 0.00533  |                                                     | H | 4.12087  | -7.46459 | 1.49963  |
|                                                     | H  | -4.57960 | 1.31406  | -0.21830 |                                                     | H | 4.17355  | -6.36417 | 0.10635  |
|                                                     |    |          |          |          |                                                     | H | 5.71137  | -6.83547 | 0.91824  |
| <b>TS1<sub>dad</sub></b> ···2H <sub>2</sub> O·2DMSO | C  | 4.17561  | -1.05854 | -1.12972 | <b>TS1<sub>dae</sub></b> ···2H <sub>2</sub> O·2DMSO | C | -3.94821 | -1.48837 | -1.57564 |
|                                                     | C  | 3.04103  | -0.46631 | -0.59953 |                                                     | C | -2.65877 | -1.03702 | -1.82394 |



|    |          |          |          |   |          |          |          |
|----|----------|----------|----------|---|----------|----------|----------|
| C  | 2.52432  | -0.93860 | 0.60931  | C | -2.10281 | -0.04975 | -1.01230 |
| C  | 3.13128  | -1.99657 | 1.28594  | C | -2.81644 | 0.49311  | 0.05809  |
| C  | 4.26630  | -2.59578 | 0.75812  | C | -4.10388 | 0.04597  | 0.31110  |
| C  | 4.77459  | -2.11637 | -0.44534 | C | -4.65390 | -0.93833 | -0.50962 |
| H  | 4.59476  | -0.71378 | -2.06841 | H | -4.40162 | -2.25341 | -2.19591 |
| H  | 2.53701  | 0.35450  | -1.09413 | H | -2.07540 | -1.44272 | -2.64506 |
| H  | 2.71569  | -2.33318 | 2.23114  | H | -2.34636 | 1.25373  | 0.67008  |
| H  | 4.75465  | -3.41669 | 1.27086  | H | -4.67938 | 0.44785  | 1.13760  |
| O  | 1.34727  | -0.46614 | 1.13239  | O | -0.79201 | 0.28519  | -1.24744 |
| N  | 5.96579  | -2.73891 | -1.00612 | N | -6.00785 | -1.40857 | -0.24119 |
| O  | 6.47624  | -3.68073 | -0.39885 | O | -6.62310 | -0.91084 | 0.70117  |
| O  | 6.41418  | -2.29820 | -2.06470 | O | -6.47789 | -2.28353 | -0.96792 |
| C  | 1.18051  | 0.87563  | 1.45056  | C | -0.42241 | 1.57456  | -1.56882 |
| C  | -0.17726 | 1.05733  | 2.06246  | C | 1.04716  | 1.61874  | -1.83054 |
| C  | -0.48264 | 2.22164  | 2.77217  | C | 1.63199  | 2.76944  | -2.36723 |
| C  | -1.16747 | 0.07555  | 1.92330  | C | 1.86747  | 0.52647  | -1.51970 |
| C  | -1.74155 | 2.39882  | 3.34255  | C | 3.00422  | 2.82484  | -2.59656 |
| H  | 0.28131  | 2.98321  | 2.88329  | H | 0.99944  | 3.61744  | -2.60355 |
| C  | -2.42288 | 0.25098  | 2.49706  | C | 3.24023  | 0.58209  | -1.74323 |
| H  | -0.96635 | -0.82543 | 1.35577  | H | 1.43307  | -0.36938 | -1.09192 |
| C  | -2.71699 | 1.41265  | 3.21199  | C | 3.81351  | 1.73231  | -2.28629 |
| H  | -1.95879 | 3.31104  | 3.89275  | H | 3.44365  | 3.72648  | -3.01623 |
| H  | -3.17859 | -0.52186 | 2.38045  | H | 3.85615  | -0.27016 | -1.46771 |
| H  | -3.69851 | 1.54810  | 3.65967  | H | 4.88576  | 1.77932  | -2.46146 |
| S  | 2.51973  | 1.79518  | 1.92723  | S | -1.52505 | 2.63296  | -2.26934 |
| C  | 1.64273  | 3.48682  | -0.90330 | C | 0.68544  | 5.17975  | 1.90655  |
| C  | 0.52225  | 2.68719  | -0.59878 | O | 0.76303  | 5.70725  | 3.02021  |
| C  | -0.74526 | 3.30601  | -0.58508 | C | 1.08162  | 5.95837  | 0.67183  |
| C  | -0.88962 | 4.65868  | -0.87493 | H | 1.93323  | 5.48313  | 0.17920  |
| C  | 0.23871  | 5.41937  | -1.17033 | H | 0.26915  | 5.97453  | -0.05714 |
| C  | 1.50431  | 4.84302  | -1.18789 | H | 1.34451  | 6.97515  | 0.96642  |
| H  | 2.62353  | 3.02380  | -0.92399 | C | 0.22181  | 3.78625  | 1.76558  |
| H  | -1.62063 | 2.70239  | -0.36300 | N | 0.15801  | 3.33440  | 0.54745  |
| H  | -1.87386 | 5.11935  | -0.87151 | O | -0.23099 | 2.08750  | 0.40523  |
| H  | 2.37611  | 5.44609  | -1.42723 | O | 0.86653  | -0.10391 | 1.84176  |
| Cl | 0.05845  | 7.13278  | -1.53874 | H | 0.64691  | -0.92762 | 1.35417  |
| O  | 0.65405  | 1.38518  | -0.34819 | H | 0.48303  | 0.64710  | 1.33469  |
| S  | -0.22559 | -3.55376 | -0.42491 | C | -0.14778 | 2.98594  | 2.97970  |
| O  | -1.46736 | -2.64903 | -0.43706 | H | 0.55227  | 2.16093  | 3.14354  |
| C  | -0.05284 | -4.08809 | 1.28923  | H | -0.15100 | 3.62524  | 3.86258  |

|                                    |    |          |          |          |                                    |   |          |          |          |
|------------------------------------|----|----------|----------|----------|------------------------------------|---|----------|----------|----------|
|                                    | H  | 0.75139  | -4.82342 | 1.36402  |                                    | H | -1.13680 | 2.53550  | 2.85122  |
|                                    | H  | 0.19927  | -3.20414 | 1.87592  |                                    | S | -0.42102 | -3.62070 | 1.57234  |
|                                    | H  | -1.00087 | -4.50870 | 1.63126  |                                    | O | 0.39355  | -2.62460 | 0.73211  |
|                                    | C  | -0.76948 | -5.12496 | -1.12657 |                                    | C | -1.49407 | -2.61136 | 2.61746  |
|                                    | H  | -1.00464 | -4.94517 | -2.17648 |                                    | H | -2.16572 | -3.26368 | 3.18013  |
|                                    | H  | 0.03959  | -5.85492 | -1.05065 |                                    | H | -0.85107 | -2.05671 | 3.30186  |
|                                    | H  | -1.65740 | -5.47202 | -0.59454 |                                    | H | -2.05606 | -1.91547 | 1.99144  |
|                                    | O  | -1.20756 | -0.15486 | -1.66774 |                                    | C | -1.68816 | -4.25995 | 0.45713  |
|                                    | H  | -1.28667 | -1.02529 | -1.21741 |                                    | H | -1.18088 | -4.86141 | -0.29855 |
|                                    | H  | -0.56203 | 0.37544  | -1.13683 |                                    | H | -2.38484 | -4.88610 | 1.01909  |
|                                    | O  | -3.69424 | 1.12653  | -1.66211 |                                    | H | -2.20548 | -3.42230 | -0.01393 |
|                                    | H  | -2.80807 | 0.69824  | -1.67570 |                                    | O | 3.64529  | -0.28124 | 2.27325  |
|                                    | H  | -4.28184 | 0.48705  | -1.20641 |                                    | H | 2.68362  | -0.16280 | 2.11216  |
|                                    | S  | -5.46336 | -2.10514 | -1.13768 |                                    | H | 3.96758  | -0.83623 | 1.53198  |
|                                    | O  | -5.32613 | -0.77380 | -0.38549 |                                    | S | 4.29579  | -3.42004 | 0.26622  |
|                                    | C  | -7.18770 | -2.59506 | -0.92008 |                                    | O | 4.56251  | -1.91181 | 0.16117  |
|                                    | H  | -7.80091 | -1.87524 | -1.46399 |                                    | C | 5.68050  | -4.20077 | -0.59008 |
|                                    | H  | -7.33872 | -3.59450 | -1.33365 |                                    | H | 6.57795  | -4.00573 | -0.00137 |
|                                    | H  | -7.43398 | -2.57171 | 0.14343  |                                    | H | 5.51011  | -5.27747 | -0.65639 |
|                                    | C  | -4.70730 | -3.34621 | -0.07013 |                                    | H | 5.77935  | -3.75956 | -1.58399 |
|                                    | H  | -4.90284 | -4.34001 | -0.48074 |                                    | C | 3.01081  | -3.77123 | -0.94892 |
|                                    | H  | -3.63175 | -3.15109 | -0.06198 |                                    | H | 2.89023  | -4.85353 | -1.04263 |
|                                    | H  | -5.12903 | -3.25204 | 0.93321  |                                    | H | 2.08678  | -3.32729 | -0.57038 |
|                                    |    |          |          |          |                                    | H | 3.29969  | -3.32960 | -1.90533 |
| <b>2d</b> ···H <sub>2</sub> O2DMSO | H  | 0.22543  | 0.59920  | -1.81601 | <b>2e</b> ···H <sub>2</sub> O2DMSO | C | 4.92316  | 0.03864  | -0.10258 |
|                                    | O  | 0.23408  | 0.75354  | -2.79891 |                                    | O | 5.80289  | 0.61581  | -0.76683 |
|                                    | H  | 0.31692  | -0.13150 | -3.20993 |                                    | C | 5.26560  | -0.40727 | 1.30545  |
|                                    | C  | -0.81407 | 2.41399  | 0.20350  |                                    | H | 5.66457  | 0.45029  | 1.85435  |
|                                    | C  | -0.20268 | 1.21398  | 0.67780  |                                    | H | 4.41474  | -0.82935 | 1.83535  |
|                                    | C  | -0.06772 | 1.10982  | 2.09488  |                                    | H | 6.06520  | -1.15214 | 1.24685  |
|                                    | C  | -0.50340 | 2.10942  | 2.95669  |                                    | C | 3.59944  | -0.21708 | -0.65193 |
|                                    | C  | -1.09441 | 3.26130  | 2.44223  |                                    | N | 2.73165  | -0.82046 | 0.13846  |
|                                    | C  | -1.24986 | 3.41294  | 1.06598  |                                    | O | 1.54632  | -1.05289 | -0.34600 |
|                                    | H  | -0.93805 | 2.53775  | -0.86992 |                                    | C | 3.26023  | 0.20351  | -2.05126 |
|                                    | H  | 0.39133  | 0.21076  | 2.50016  |                                    | H | 2.39793  | 0.87872  | -2.05780 |
|                                    | H  | -0.38397 | 1.99300  | 4.03136  |                                    | H | 4.11359  | 0.70420  | -2.50934 |
|                                    | H  | -1.71220 | 4.31299  | 0.66735  |                                    | H | 2.97640  | -0.65749 | -2.66554 |
|                                    | Cl | -1.64904 | 4.53324  | 3.53830  |                                    | S | -1.54335 | 2.18568  | -1.83669 |
|                                    | O  | 0.21073  | 0.27618  | -0.12118 |                                    | O | -2.05300 | 0.78334  | -2.20095 |
|                                    | S  | 3.99684  | -0.67731 | -1.18796 |                                    | C | -2.07158 | 3.25033  | -3.19704 |

|                                               |   |          |          |          |                                               |   |          |          |          |
|-----------------------------------------------|---|----------|----------|----------|-----------------------------------------------|---|----------|----------|----------|
|                                               | O | 3.63759  | -2.16526 | -1.20393 |                                               | H | -1.84185 | 4.29107  | -2.95841 |
|                                               | C | 3.39440  | -0.03094 | 0.38483  |                                               | H | -1.51448 | 2.94485  | -4.08390 |
|                                               | H | 3.77300  | 0.98511  | 0.52209  |                                               | H | -3.14269 | 3.11557  | -3.36118 |
|                                               | H | 2.29956  | -0.01505 | 0.33031  |                                               | C | -2.67558 | 2.79861  | -0.57527 |
|                                               | H | 3.74465  | -0.68556 | 1.18671  |                                               | H | -2.50692 | 2.19853  | 0.32389  |
|                                               | C | 5.76661  | -0.61699 | -0.81775 |                                               | H | -2.45291 | 3.84976  | -0.37535 |
|                                               | H | 6.29200  | -1.05904 | -1.66577 |                                               | H | -3.69998 | 2.68248  | -0.93698 |
|                                               | H | 6.08310  | 0.42042  | -0.68937 |                                               | O | 0.03246  | -1.08915 | -2.68946 |
|                                               | H | 5.96192  | -1.19723 | 0.08672  |                                               | H | -0.69281 | -0.46084 | -2.49247 |
|                                               | S | 1.75668  | -2.13580 | -4.75511 |                                               | H | 0.66049  | -1.01600 | -1.93337 |
|                                               | O | 0.46187  | -1.80305 | -4.00231 |                                               | S | -2.16076 | -0.65797 | 2.02060  |
|                                               | C | 1.22190  | -2.96780 | -6.26681 |                                               | O | -1.87497 | 0.84489  | 1.93317  |
|                                               | H | 0.69156  | -2.23169 | -6.87264 |                                               | C | -1.64680 | -1.36695 | 0.44396  |
|                                               | H | 2.09428  | -3.33423 | -6.81223 |                                               | H | -0.55482 | -1.31554 | 0.39132  |
|                                               | H | 0.55321  | -3.79009 | -6.00396 |                                               | H | -1.97139 | -2.41026 | 0.40426  |
|                                               | C | 2.46075  | -3.56410 | -3.90996 |                                               | H | -2.08381 | -0.78534 | -0.37118 |
|                                               | H | 3.29684  | -3.95190 | -4.49722 |                                               | C | -3.94763 | -0.82666 | 1.79548  |
|                                               | H | 2.81811  | -3.21301 | -2.93723 |                                               | H | -4.43016 | -0.34818 | 2.64912  |
|                                               | H | 1.68241  | -4.32232 | -3.79675 |                                               | H | -4.24182 | -0.32827 | 0.86948  |
|                                               |   |          |          |          |                                               | H | -4.21598 | -1.88507 | 1.76703  |
| <b>TS1</b> <b>dad</b> ..H <sub>2</sub> O2DMSO | C | 4.21590  | 0.24957  | -1.00995 | <b>TS1</b> <b>dae</b> ..H <sub>2</sub> O2DMSO | C | 1.53687  | 3.80534  | -1.47670 |
|                                               | C | 2.91780  | 0.43231  | -0.56213 |                                               | C | 0.88601  | 2.58478  | -1.58818 |
|                                               | C | 2.50180  | -0.20812 | 0.60738  |                                               | C | 1.41601  | 1.45736  | -0.96266 |
|                                               | C | 3.36999  | -1.02955 | 1.32575  |                                               | C | 2.59232  | 1.53109  | -0.21369 |
|                                               | C | 4.67059  | -1.21920 | 0.88001  |                                               | C | 3.24689  | 2.74695  | -0.10079 |
|                                               | C | 5.07662  | -0.57440 | -0.28439 |                                               | C | 2.71281  | 3.86868  | -0.73502 |
|                                               | H | 4.56387  | 0.73204  | -1.91649 |                                               | H | 1.14381  | 4.69430  | -1.95669 |
|                                               | H | 2.20939  | 1.06051  | -1.08765 |                                               | H | -0.03385 | 2.49375  | -2.15783 |
|                                               | H | 3.02290  | -1.50431 | 2.23861  |                                               | H | 2.96296  | 0.63697  | 0.27212  |
|                                               | H | 5.36226  | -1.85074 | 1.42589  |                                               | H | 4.15940  | 2.83456  | 0.47813  |
|                                               | O | 1.20032  | -0.14932 | 1.04148  |                                               | O | 0.66820  | 0.30958  | -1.03478 |
|                                               | N | 6.43993  | -0.76737 | -0.75940 |                                               | N | 3.40156  | 5.14628  | -0.61196 |
|                                               | O | 7.18513  | -1.50863 | -0.11784 |                                               | O | 4.44229  | 5.19001  | 0.04435  |
|                                               | O | 6.79198  | -0.18145 | -1.78341 |                                               | O | 2.91471  | 6.13061  | -1.16896 |
|                                               | C | 0.61015  | 1.05818  | 1.38864  |                                               | C | 1.18761  | -0.88633 | -1.47544 |
|                                               | C | -0.78610 | 0.79074  | 1.86537  |                                               | C | 0.11530  | -1.92457 | -1.46584 |
|                                               | C | -1.44636 | 1.71377  | 2.67909  |                                               | C | 0.38720  | -3.21428 | -1.93399 |
|                                               | C | -1.46038 | -0.37978 | 1.48939  |                                               | C | -1.16795 | -1.63571 | -0.98238 |
|                                               | C | -2.74650 | 1.47126  | 3.12002  |                                               | C | -0.60200 | -4.19310 | -1.92269 |
|                                               | H | -0.92808 | 2.62084  | 2.97027  |                                               | H | 1.38037  | -3.43843 | -2.30539 |

|    |          |          |          |   |          |          |          |
|----|----------|----------|----------|---|----------|----------|----------|
| C  | -2.75665 | -0.62587 | 1.93137  | C | -2.16093 | -2.61325 | -0.97746 |
| H  | -0.98010 | -1.09873 | 0.83549  | H | -1.39581 | -0.64245 | -0.61221 |
| C  | -3.40501 | 0.30084  | 2.75124  | C | -1.87935 | -3.89647 | -1.44666 |
| H  | -3.24364 | 2.20090  | 3.75462  | H | -0.37511 | -5.19169 | -2.28820 |
| H  | -3.26821 | -1.53742 | 1.62739  | H | -3.15307 | -2.36763 | -0.60388 |
| H  | -4.41848 | 0.11040  | 3.09669  | H | -2.65194 | -4.66185 | -1.44234 |
| S  | 1.56505  | 2.31104  | 2.00179  | S | 2.50904  | -0.93053 | -2.51100 |
| C  | 0.39115  | 3.82113  | -0.90104 | C | 3.57137  | -4.24010 | 1.62063  |
| C  | -0.43029 | 2.69974  | -0.65877 | O | 4.06937  | -4.68642 | 2.65936  |
| C  | -1.82748 | 2.90200  | -0.64916 | C | 3.60154  | -5.06623 | 0.35313  |
| C  | -2.37884 | 4.15618  | -0.88775 | H | 2.58768  | -5.26231 | -0.00258 |
| C  | -1.53666 | 5.23852  | -1.13018 | H | 4.11477  | -4.52871 | -0.44710 |
| C  | -0.15479 | 5.07998  | -1.13824 | H | 4.11349  | -6.00713 | 0.55919  |
| H  | 1.46761  | 3.68343  | -0.90990 | C | 2.93564  | -2.91121 | 1.60004  |
| H  | -2.47351 | 2.05078  | -0.45404 | N | 2.44899  | -2.53673 | 0.45189  |
| H  | -3.45700 | 4.29279  | -0.88529 | O | 1.85983  | -1.36634 | 0.42083  |
| H  | 0.49151  | 5.93219  | -1.33102 | O | -0.05670 | -0.31463 | 2.24902  |
| Cl | -2.23215 | 6.82847  | -1.43730 | H | -0.77276 | 0.03130  | 1.68077  |
| O  | 0.09268  | 1.49618  | -0.45532 | H | 0.62043  | -0.68204 | 1.64039  |
| S  | 0.79655  | -3.56448 | -0.44449 | C | 2.87653  | -2.07610 | 2.84526  |
| O  | -0.58563 | -3.00939 | -0.81354 | H | 1.84522  | -1.94685 | 3.18862  |
| C  | 0.74588  | -3.80795 | 1.34275  | H | 3.45639  | -2.54563 | 3.64004  |
| H  | 1.65587  | -4.31630 | 1.66960  | H | 3.26957  | -1.07336 | 2.65052  |
| H  | 0.68892  | -2.81873 | 1.79801  | S | -2.05769 | 2.47179  | 1.88592  |
| H  | -0.14167 | -4.39117 | 1.59755  | O | -2.21269 | 1.16833  | 1.08701  |
| C  | 0.75853  | -5.30140 | -0.93516 | C | -3.67840 | 3.26412  | 1.81605  |
| H  | 0.70066  | -5.32793 | -2.02420 | H | -3.68999 | 4.12983  | 2.48229  |
| H  | 1.67542  | -5.79395 | -0.60359 | H | -3.83790 | 3.59222  | 0.78789  |
| H  | -0.12036 | -5.78004 | -0.49863 | H | -4.44226 | 2.53933  | 2.10525  |
| O  | -0.71381 | -0.54641 | -2.19335 | C | -2.09307 | 1.97337  | 3.62121  |
| H  | -0.66895 | -1.39366 | -1.70391 | H | -1.21003 | 1.35281  | 3.78241  |
| H  | -0.47547 | 0.15188  | -1.54174 | H | -2.05613 | 2.86087  | 4.25694  |
| S  | -4.55257 | -3.02146 | -0.82235 | H | -2.99991 | 1.39466  | 3.80918  |
| O  | -4.48379 | -3.35823 | 0.66748  | S | -5.72485 | -0.18284 | -0.05362 |
| C  | -6.16408 | -3.62212 | -1.38387 | O | -5.18626 | -1.57778 | 0.26207  |
| H  | -6.92589 | -3.01289 | -0.89503 | C | -7.06333 | -0.43661 | -1.24330 |
| H  | -6.24319 | -3.50952 | -2.46737 | H | -7.86237 | -0.96790 | -0.72396 |
| H  | -6.27770 | -4.66837 | -1.09195 | H | -7.43296 | 0.52823  | -1.59727 |
| C  | -3.53212 | -4.25293 | -1.66100 | H | -6.69230 | -1.03985 | -2.07469 |
| H  | -3.66400 | -4.15864 | -2.74159 | C | -4.53769 | 0.57429  | -1.18456 |

|                                                    |    |          |          |          |                                                    |    |          |          |          |
|----------------------------------------------------|----|----------|----------|----------|----------------------------------------------------|----|----------|----------|----------|
|                                                    | H  | -2.49471 | -4.03958 | -1.39195 |                                                    | H  | -4.94866 | 1.51361  | -1.56409 |
|                                                    | H  | -3.82876 | -5.24744 | -1.31939 |                                                    | H  | -3.63238 | 0.77076  | -0.60573 |
|                                                    |    |          |          |          |                                                    | H  | -4.33474 | -0.11779 | -2.00499 |
| <b>TS1<sub>abd</sub></b> ···2H <sub>2</sub> O1DMSO | C  | 1.44682  | 3.10638  | -0.39138 | <b>IN1<sub>abd</sub></b> ···2H <sub>2</sub> O1DMSO | O  | -1.64256 | -0.19621 | 0.56378  |
|                                                    | C  | 0.67274  | 2.08517  | 0.13432  |                                                    | C  | -2.92042 | -0.04248 | 0.12512  |
|                                                    | C  | 1.28572  | 1.05638  | 0.86489  |                                                    | C  | -3.21412 | -0.62821 | -1.11589 |
|                                                    | C  | 2.67601  | 1.06543  | 1.05802  |                                                    | C  | -3.93596 | 0.63591  | 0.81203  |
|                                                    | C  | 3.45130  | 2.08208  | 0.52875  |                                                    | C  | -4.49025 | -0.54698 | -1.65909 |
|                                                    | C  | 2.82716  | 3.09991  | -0.19142 |                                                    | H  | -2.42753 | -1.15820 | -1.64509 |
|                                                    | H  | 0.98786  | 3.90537  | -0.96305 |                                                    | C  | -5.21701 | 0.71284  | 0.26719  |
|                                                    | H  | -0.39479 | 2.06274  | -0.02526 |                                                    | H  | -3.72373 | 1.12144  | 1.75553  |
|                                                    | H  | 3.13601  | 0.26371  | 1.62796  |                                                    | C  | -5.48923 | 0.12453  | -0.96057 |
|                                                    | H  | 4.52564  | 2.09522  | 0.67390  |                                                    | H  | -4.70454 | -1.00711 | -2.61960 |
|                                                    | O  | 0.62138  | -0.00677 | 1.37752  |                                                    | H  | -5.99932 | 1.24050  | 0.80564  |
|                                                    | N  | 3.63058  | 4.17132  | -0.74636 |                                                    | Cl | -7.10657 | 0.23019  | -1.64055 |
|                                                    | O  | 4.85151  | 4.14142  | -0.57543 |                                                    | C  | 3.45001  | 1.48272  | 0.79395  |
|                                                    | O  | 3.06376  | 5.07240  | -1.36864 |                                                    | C  | 2.51655  | 0.70362  | 1.44969  |
|                                                    | C  | -0.79014 | 0.09163  | 1.75045  |                                                    | C  | 1.14355  | 0.79250  | 1.13158  |
|                                                    | C  | -3.35351 | 1.20856  | 0.00252  |                                                    | C  | 0.73193  | 1.69921  | 0.13182  |
|                                                    | C  | -2.72865 | -0.04939 | -0.10696 |                                                    | C  | 1.66646  | 2.48278  | -0.52179 |
|                                                    | C  | -3.53856 | -1.16087 | -0.41361 |                                                    | C  | 3.01956  | 2.37399  | -0.19238 |
|                                                    | C  | -4.90914 | -1.02530 | -0.61170 |                                                    | H  | 4.50386  | 1.41046  | 1.03922  |
|                                                    | C  | -5.49550 | 0.23096  | -0.49211 |                                                    | H  | 2.82797  | 0.00543  | 2.22057  |
|                                                    | C  | -4.72608 | 1.34823  | -0.18458 |                                                    | H  | -0.31565 | 1.77475  | -0.12166 |
|                                                    | H  | -2.75003 | 2.07764  | 0.24023  |                                                    | H  | 1.35580  | 3.17693  | -1.29500 |
|                                                    | H  | -3.07024 | -2.13715 | -0.50465 |                                                    | O  | 0.31843  | -0.02467 | 1.78794  |
|                                                    | H  | -5.51710 | -1.89252 | -0.85501 |                                                    | N  | 3.98789  | 3.19386  | -0.88027 |
|                                                    | H  | -5.19327 | 2.32561  | -0.09815 |                                                    | O  | 3.59071  | 3.98659  | -1.73992 |
|                                                    | Cl | -7.22995 | 0.40902  | -0.73962 |                                                    | O  | 5.18139  | 3.07435  | -0.58562 |
|                                                    | O  | -1.40836 | -0.19657 | 0.05445  |                                                    | C  | -1.22919 | 0.33088  | 1.93117  |
|                                                    | H  | 1.99790  | -2.96786 | 1.32472  |                                                    | O  | -1.44876 | 1.54665  | 2.12905  |
|                                                    | O  | 2.26759  | -2.36361 | 2.05144  |                                                    | C  | -1.65524 | -0.71333 | 2.95576  |
|                                                    | H  | 1.68689  | -1.58832 | 1.95685  |                                                    | H  | -1.23260 | -0.44919 | 3.92747  |
|                                                    | O  | -0.29008 | -2.26480 | -1.44027 |                                                    | H  | -2.74405 | -0.70652 | 3.03973  |
|                                                    | H  | -0.65518 | -1.54933 | -0.86819 |                                                    | H  | -1.32695 | -1.71588 | 2.67591  |
|                                                    | H  | 0.26009  | -2.83305 | -0.86838 |                                                    | O  | 1.68130  | -2.42443 | 2.72257  |
|                                                    | S  | 2.91139  | -3.82084 | -1.19285 |                                                    | H  | 1.13418  | -1.63356 | 2.56379  |
|                                                    | O  | 1.72911  | -3.90737 | -0.20233 |                                                    | H  | 1.99280  | -2.67555 | 1.82708  |
|                                                    | C  | 3.14392  | -2.05789 | -1.50766 |                                                    | O  | -0.29638 | -2.38755 | -0.76198 |
|                                                    | H  | 3.99764  | -1.92473 | -2.17602 |                                                    | H  | 0.61609  | -2.59461 | -0.47346 |

|                                                    |    |          |          |          |                                                    |   |          |          |          |
|----------------------------------------------------|----|----------|----------|----------|----------------------------------------------------|---|----------|----------|----------|
|                                                    | H  | 2.22749  | -1.70403 | -1.98277 |                                                    | H | -0.60200 | -1.64703 | -0.20490 |
|                                                    | H  | 3.30187  | -1.53958 | -0.56023 |                                                    | S | 3.56872  | -2.36767 | -0.65326 |
|                                                    | C  | 4.38596  | -4.10867 | -0.19284 |                                                    | O | 2.33762  | -2.96738 | 0.05421  |
|                                                    | H  | 4.36150  | -5.15089 | 0.12830  |                                                    | C | 4.15987  | -3.67994 | -1.74018 |
|                                                    | H  | 5.27256  | -3.93391 | -0.80655 |                                                    | H | 4.96719  | -3.29446 | -2.36665 |
|                                                    | H  | 4.36686  | -3.44194 | 0.67150  |                                                    | H | 4.53824  | -4.48079 | -1.10366 |
|                                                    | O  | -1.20363 | 1.16551  | 2.18749  |                                                    | H | 3.32953  | -4.04118 | -2.34987 |
|                                                    | C  | -1.16134 | -1.24019 | 2.36233  |                                                    | C | 2.90577  | -1.26583 | -1.91887 |
|                                                    | H  | -0.75789 | -1.28422 | 3.37866  |                                                    | H | 2.42707  | -0.43164 | -1.40577 |
|                                                    | H  | -2.24834 | -1.30740 | 2.41737  |                                                    | H | 3.72935  | -0.89770 | -2.53474 |
|                                                    | H  | -0.77572 | -2.07918 | 1.78381  |                                                    | H | 2.17357  | -1.80579 | -2.52206 |
| <b>TS2<sub>dbd</sub></b> ···2H <sub>2</sub> O1DMSO | O  | -1.68075 | -0.22047 | 0.62845  | <b>TS1<sub>dbe</sub></b> ···2H <sub>2</sub> O1DMSO | C | 1.39801  | 2.92539  | -0.38088 |
|                                                    | C  | -2.97140 | -0.09327 | 0.20585  |                                                    | C | 0.51632  | 2.00316  | 0.15923  |
|                                                    | C  | -3.27336 | -0.72329 | -1.00954 |                                                    | C | 1.01392  | 0.94425  | 0.92864  |
|                                                    | C  | -3.98109 | 0.59392  | 0.88904  |                                                    | C | 2.38998  | 0.81085  | 1.14776  |
|                                                    | C  | -4.55871 | -0.67493 | -1.53413 |                                                    | C | 3.27410  | 1.72821  | 0.60307  |
|                                                    | H  | -2.48668 | -1.26005 | -1.53177 |                                                    | C | 2.76632  | 2.78139  | -0.15404 |
|                                                    | C  | -5.27182 | 0.63729  | 0.36296  |                                                    | H | 1.03321  | 3.74963  | -0.98360 |
|                                                    | H  | -3.76419 | 1.11005  | 1.81546  |                                                    | H | -0.54743 | 2.07755  | -0.02000 |
|                                                    | C  | -5.55488 | 0.00666  | -0.84093 |                                                    | H | 2.75609  | -0.01708 | 1.74755  |
|                                                    | H  | -4.78258 | -1.16838 | -2.47567 |                                                    | H | 4.34203  | 1.63631  | 0.76562  |
|                                                    | H  | -6.05241 | 1.17148  | 0.89728  |                                                    | O | 0.22089  | -0.03636 | 1.44792  |
|                                                    | Cl | -7.18305 | 0.07020  | -1.49742 |                                                    | N | 3.68604  | 3.75081  | -0.72497 |
|                                                    | C  | 3.47462  | 1.52643  | 0.70352  |                                                    | O | 4.89344  | 3.59950  | -0.53148 |
|                                                    | C  | 2.57216  | 0.73678  | 1.38618  |                                                    | O | 3.22266  | 4.68564  | -1.38010 |
|                                                    | C  | 1.18923  | 0.76693  | 1.07665  |                                                    | C | -1.09041 | 0.27596  | 1.94450  |
|                                                    | C  | 0.74885  | 1.63642  | 0.04904  |                                                    | O | -1.33188 | 1.40521  | 2.34334  |
|                                                    | C  | 1.65250  | 2.43087  | -0.63061 |                                                    | C | -1.69055 | -0.97729 | 2.52252  |
|                                                    | C  | 3.01222  | 2.37701  | -0.30685 |                                                    | H | -1.31002 | -1.11168 | 3.54015  |
|                                                    | H  | 4.53166  | 1.49578  | 0.94416  |                                                    | H | -2.77184 | -0.84910 | 2.56258  |
|                                                    | H  | 2.91115  | 0.07100  | 2.17413  |                                                    | H | -1.44725 | -1.85666 | 1.92736  |
|                                                    | H  | -0.30185 | 1.66912  | -0.20362 |                                                    | C | -5.28005 | 0.91141  | -0.70769 |
|                                                    | H  | 1.31605  | 3.09162  | -1.42219 |                                                    | O | -6.00519 | 1.03246  | -1.69950 |
|                                                    | O  | 0.38756  | -0.04070 | 1.74853  |                                                    | C | -5.84850 | 1.13364  | 0.67711  |
|                                                    | N  | 3.94692  | 3.20489  | -1.02094 |                                                    | H | -5.84471 | 0.19754  | 1.24126  |
|                                                    | O  | 3.52180  | 3.96127  | -1.90208 |                                                    | H | -5.24429 | 1.84452  | 1.24290  |
|                                                    | O  | 5.14722  | 3.13416  | -0.73124 |                                                    | H | -6.87242 | 1.49743  | 0.58200  |
|                                                    | C  | -1.26909 | 0.34654  | 1.94071  |                                                    | C | -3.86026 | 0.53793  | -0.85315 |
|                                                    | O  | -1.44694 | 1.56251  | 2.10270  |                                                    | N | -3.19280 | 0.44543  | 0.25853  |
|                                                    | C  | -1.59042 | -0.66416 | 3.02711  |                                                    | O | -1.92366 | 0.09471  | 0.15248  |

|                                                    |   |          |          |          |                                                    |   |          |          |          |
|----------------------------------------------------|---|----------|----------|----------|----------------------------------------------------|---|----------|----------|----------|
|                                                    | H | -1.12454 | -0.34556 | 3.96113  |                                                    | O | -1.26555 | -2.25669 | -1.26783 |
|                                                    | H | -2.67377 | -0.69051 | 3.17110  |                                                    | H | -0.71371 | -2.81988 | -0.69153 |
|                                                    | H | -1.24274 | -1.66408 | 2.76544  |                                                    | H | -1.46816 | -1.43551 | -0.76642 |
|                                                    | O | 1.72170  | -2.40497 | 2.69389  |                                                    | O | 1.56184  | -2.58898 | 2.14862  |
|                                                    | H | 1.20312  | -1.59663 | 2.51601  |                                                    | H | 1.10106  | -1.73628 | 2.07020  |
|                                                    | H | 2.03524  | -2.67714 | 1.80584  |                                                    | H | 1.18911  | -3.13863 | 1.42374  |
|                                                    | O | -0.22142 | -2.30228 | -0.78345 |                                                    | C | -3.26916 | 0.30996  | -2.21306 |
|                                                    | H | 0.68698  | -2.53841 | -0.50410 |                                                    | H | -3.02822 | -0.74586 | -2.37122 |
|                                                    | H | -0.51828 | -1.59345 | -0.18378 |                                                    | H | -3.96930 | 0.63053  | -2.98476 |
|                                                    | S | 3.65708  | -2.38867 | -0.63108 |                                                    | H | -2.33102 | 0.86421  | -2.31193 |
|                                                    | O | 2.39495  | -2.97865 | 0.02802  |                                                    | S | 1.81057  | -4.02982 | -1.17926 |
|                                                    | C | 4.28916  | -3.71130 | -1.68202 |                                                    | O | 0.71032  | -3.98835 | -0.09583 |
|                                                    | H | 5.12237  | -3.33292 | -2.27819 |                                                    | C | 2.16906  | -2.30168 | -1.56089 |
|                                                    | H | 4.63922  | -4.50762 | -1.02395 |                                                    | H | 2.97960  | -2.25759 | -2.29187 |
|                                                    | H | 3.48352  | -4.07595 | -2.32205 |                                                    | H | 1.25393  | -1.88071 | -1.98040 |
|                                                    | C | 3.05206  | -1.29474 | -1.93159 |                                                    | H | 2.44098  | -1.77760 | -0.64277 |
|                                                    | H | 2.54929  | -0.45864 | -1.44534 |                                                    | C | 3.33131  | -4.42743 | -0.29208 |
|                                                    | H | 3.90234  | -0.92888 | -2.51149 |                                                    | H | 3.24316  | -5.45744 | 0.05618  |
|                                                    | H | 2.34943  | -1.83951 | -2.56499 |                                                    | H | 4.17676  | -4.34283 | -0.97856 |
|                                                    |   |          |          |          |                                                    | H | 3.43970  | -3.74662 | 0.55453  |
| <b>IN1<sub>dbc</sub></b> ···2H <sub>2</sub> O:DMSO | C | 1.29617  | -0.83246 | 1.79328  | <b>TS2<sub>dbc</sub></b> ···2H <sub>2</sub> O:DMSO | C | 1.35825  | -0.97550 | 1.76648  |
|                                                    | C | 3.59216  | -0.83253 | -0.94157 |                                                    | C | 3.65687  | -1.06474 | -0.86935 |
|                                                    | C | 2.81535  | -0.43819 | -2.16047 |                                                    | C | 2.90968  | -0.62173 | -2.08858 |
|                                                    | H | 1.86142  | -0.97123 | -2.18576 |                                                    | H | 1.97968  | -1.18857 | -2.18506 |
|                                                    | H | 2.58500  | 0.63129  | -2.14499 |                                                    | H | 2.63467  | 0.43383  | -2.00723 |
|                                                    | H | 3.39016  | -0.66306 | -3.05830 |                                                    | H | 3.52344  | -0.76844 | -2.97637 |
|                                                    | N | 3.11848  | -0.89548 | 0.25248  |                                                    | N | 3.16827  | -1.13277 | 0.31587  |
|                                                    | O | 1.81692  | -0.52804 | 0.34319  |                                                    | O | 1.86284  | -0.72665 | 0.37867  |
|                                                    | C | 5.03528  | -1.20235 | -1.05871 |                                                    | C | 5.09272  | -1.48176 | -0.97390 |
|                                                    | O | 5.58116  | -1.18399 | -2.15715 |                                                    | O | 5.64846  | -1.46227 | -2.06541 |
|                                                    | C | 5.79647  | -1.58563 | 0.18602  |                                                    | C | 5.82177  | -1.91342 | 0.27295  |
|                                                    | H | 6.81355  | -1.86210 | -0.09283 |                                                    | H | 6.84043  | -2.19606 | 0.00689  |
|                                                    | H | 5.81859  | -0.74975 | 0.88934  |                                                    | H | 5.83876  | -1.10204 | 1.00435  |
|                                                    | H | 5.30686  | -2.41606 | 0.69874  |                                                    | H | 5.30994  | -2.75442 | 0.74581  |
|                                                    | C | -1.89343 | -2.69027 | -0.51583 |                                                    | C | -2.11066 | -2.51807 | -0.55165 |
|                                                    | C | -0.83587 | -2.03711 | 0.09222  |                                                    | C | -1.01785 | -1.89217 | 0.01385  |
|                                                    | C | -1.08175 | -0.95004 | 0.95400  |                                                    | C | -1.18947 | -0.78521 | 0.88433  |
|                                                    | C | -2.41204 | -0.54482 | 1.18744  |                                                    | C | -2.51270 | -0.35092 | 1.16072  |
|                                                    | C | -3.46755 | -1.19427 | 0.57656  |                                                    | C | -3.60318 | -0.97315 | 0.59091  |
|                                                    | C | -3.20252 | -2.26971 | -0.27404 |                                                    | C | -3.40284 | -2.06180 | -0.26679 |

|                                                      |   |          |          |          |                                                      |   |          |          |          |
|------------------------------------------------------|---|----------|----------|----------|------------------------------------------------------|---|----------|----------|----------|
|                                                      | H | -1.71123 | -3.52498 | -1.18371 |                                                      | H | -1.97600 | -3.35935 | -1.22281 |
|                                                      | H | 0.18023  | -2.35454 | -0.09111 |                                                      | H | -0.01746 | -2.23679 | -0.20978 |
|                                                      | H | -2.59298 | 0.29103  | 1.85660  |                                                      | H | -2.64917 | 0.49210  | 1.83160  |
|                                                      | H | -4.49023 | -0.88117 | 0.75533  |                                                      | H | -4.61042 | -0.63235 | 0.80429  |
|                                                      | O | -0.12314 | -0.23479 | 1.56026  |                                                      | O | -0.18399 | -0.13199 | 1.43143  |
|                                                      | N | -4.29979 | -2.95636 | -0.91374 |                                                      | N | -4.53377 | -2.71448 | -0.86113 |
|                                                      | O | -5.45083 | -2.56441 | -0.69753 |                                                      | O | -5.66981 | -2.29266 | -0.60703 |
|                                                      | O | -4.05062 | -3.91195 | -1.65519 |                                                      | O | -4.34204 | -3.68074 | -1.61112 |
|                                                      | O | -1.12872 | 2.19111  | 2.88113  |                                                      | O | -0.93499 | 2.29778  | 2.76119  |
|                                                      | H | -0.70951 | 1.36967  | 2.56667  |                                                      | H | -0.63206 | 1.44438  | 2.39008  |
|                                                      | H | -1.03311 | 2.81473  | 2.13119  |                                                      | H | -0.78193 | 2.94469  | 2.04302  |
|                                                      | O | 1.28019  | 2.17663  | -0.61878 |                                                      | O | 1.24158  | 1.99037  | -0.66825 |
|                                                      | H | 0.70307  | 2.68458  | -0.00962 |                                                      | H | 0.77807  | 2.61780  | -0.07327 |
|                                                      | H | 1.35275  | 1.27552  | -0.25017 |                                                      | H | 1.21745  | 1.12186  | -0.22704 |
|                                                      | S | -1.64355 | 4.13978  | -0.50280 |                                                      | S | -1.36977 | 4.35049  | -0.54377 |
|                                                      | O | -0.65290 | 3.78569  | 0.62692  |                                                      | O | -0.35342 | 3.95695  | 0.54979  |
|                                                      | C | -0.61179 | 4.78246  | -1.83686 |                                                      | C | -0.37304 | 4.66212  | -2.01599 |
|                                                      | H | -1.23271 | 4.94650  | -2.72044 |                                                      | H | -1.03775 | 4.83390  | -2.86562 |
|                                                      | H | -0.19938 | 5.73304  | -1.49607 |                                                      | H | 0.21453  | 5.56061  | -1.82247 |
|                                                      | H | 0.18781  | 4.06767  | -2.04075 |                                                      | H | 0.28093  | 3.80535  | -2.18942 |
|                                                      | C | -2.09391 | 2.56488  | -1.26344 |                                                      | C | -2.13276 | 2.80138  | -1.07222 |
|                                                      | H | -2.66684 | 2.00098  | -0.52630 |                                                      | H | -2.71914 | 2.42589  | -0.23296 |
|                                                      | H | -2.71461 | 2.75884  | -2.14125 |                                                      | H | -2.79052 | 2.99994  | -1.92151 |
|                                                      | H | -1.18229 | 2.02689  | -1.53019 |                                                      | H | -1.34740 | 2.09020  | -1.33441 |
|                                                      | O | 1.32373  | -2.04481 | 2.09059  |                                                      | O | 1.18253  | -2.15119 | 2.07422  |
|                                                      | C | 1.93788  | 0.20499  | 2.70167  |                                                      | C | 1.93338  | 0.05144  | 2.71462  |
|                                                      | H | 1.49294  | 0.12826  | 3.69626  |                                                      | H | 1.39613  | 0.00430  | 3.66266  |
|                                                      | H | 3.00347  | -0.01805 | 2.77487  |                                                      | H | 2.98198  | -0.20238 | 2.88839  |
|                                                      | H | 1.80918  | 1.22163  | 2.32547  |                                                      | H | 1.87272  | 1.06131  | 2.30918  |
| <b>TS1<sub>dbd</sub> ··· 2H<sub>2</sub>O · 2DMSO</b> | C | 4.66580  | 0.45548  | -0.41866 | <b>TS1<sub>dbe</sub> ··· 2H<sub>2</sub>O · 2DMSO</b> | C | 4.75718  | 0.45949  | -0.56618 |
|                                                      | C | 3.37387  | 0.54956  | 0.07032  |                                                      | C | 3.54420  | 0.58198  | 0.09120  |
|                                                      | C | 2.71610  | -0.60315 | 0.53180  |                                                      | C | 2.94972  | -0.55181 | 0.66544  |
|                                                      | C | 3.37913  | -1.84146 | 0.49224  |                                                      | C | 3.58287  | -1.79941 | 0.57103  |
|                                                      | C | 4.66778  | -1.93929 | 0.00069  |                                                      | C | 4.79237  | -1.92587 | -0.08986 |
|                                                      | C | 5.30609  | -0.78384 | -0.45076 |                                                      | C | 5.37270  | -0.78948 | -0.65163 |
|                                                      | H | 5.18039  | 1.33764  | -0.78318 |                                                      | H | 5.22680  | 1.32495  | -1.02029 |
|                                                      | H | 2.86018  | 1.49890  | 0.08644  |                                                      | H | 3.04256  | 1.53724  | 0.15343  |
|                                                      | H | 2.86556  | -2.72521 | 0.85682  |                                                      | H | 3.11245  | -2.66475 | 1.02813  |
|                                                      | H | 5.18049  | -2.89405 | -0.03025 |                                                      | H | 5.28785  | -2.88715 | -0.16592 |
|                                                      | O | 1.44606  | -0.62704 | 0.98437  |                                                      | O | 1.74275  | -0.54429 | 1.28229  |



|    |          |          |          |   |          |          |          |
|----|----------|----------|----------|---|----------|----------|----------|
| N  | 6.65627  | -0.87386 | -0.96410 | N | 6.64241  | -0.90995 | -1.34162 |
| O  | 7.20234  | -1.97985 | -0.99882 | O | 7.16548  | -2.02368 | -1.42263 |
| O  | 7.21279  | 0.15795  | -1.34855 | O | 7.15151  | 0.10527  | -1.82156 |
| C  | 0.83183  | 0.57143  | 1.56673  | C | 1.29445  | 0.62093  | 2.00395  |
| C  | 0.72196  | 3.63309  | 0.52111  | O | 2.12688  | 1.36672  | 2.51470  |
| C  | -0.06154 | 2.56654  | 0.04046  | C | -0.02347 | 0.28006  | 2.65326  |
| C  | -1.35300 | 2.85783  | -0.43882 | H | 0.17743  | -0.27752 | 3.57388  |
| C  | -1.84193 | 4.16104  | -0.44320 | H | -0.52733 | 1.21193  | 2.91127  |
| C  | -1.04810 | 5.19237  | 0.04815  | H | -0.66351 | -0.31649 | 2.00394  |
| C  | 0.23065  | 4.93585  | 0.53086  | C | -0.65237 | 4.78666  | 0.16955  |
| H  | 1.71854  | 3.42906  | 0.89432  | O | -1.01463 | 5.59254  | -0.69057 |
| H  | -1.96981 | 2.05320  | -0.82967 | C | -0.70766 | 5.16003  | 1.63410  |
| H  | -2.83749 | 4.37028  | -0.82532 | H | -1.44398 | 4.54098  | 2.15291  |
| H  | 0.84652  | 5.74923  | 0.90514  | H | 0.25201  | 4.98380  | 2.12261  |
| Cl | -1.66505 | 6.84177  | 0.04915  | H | -0.98939 | 6.21032  | 1.71873  |
| O  | 0.40353  | 1.30727  | 0.00252  | C | -0.17396 | 3.44195  | -0.21697 |
| S  | -0.28603 | -3.74746 | 0.02324  | N | 0.19222  | 2.68222  | 0.76863  |
| O  | -1.44161 | -2.77463 | -0.25696 | O | 0.60308  | 1.46384  | 0.44668  |
| C  | -0.06724 | -3.72863 | 1.81333  | C | -0.12488 | 3.04650  | -1.66303 |
| H  | 0.64197  | -4.50854 | 2.10122  | H | -0.97641 | 2.41424  | -1.93634 |
| H  | 0.33340  | -2.74807 | 2.07030  | H | -0.14686 | 3.93521  | -2.29477 |
| H  | -1.03477 | -3.88633 | 2.29466  | H | 0.78282  | 2.47075  | -1.86146 |
| C  | -1.00806 | -5.39429 | -0.13083 | O | -0.94641 | -0.31488 | -1.06849 |
| H  | -1.28240 | -5.52974 | -1.17786 | H | -1.42670 | -0.85878 | -0.40341 |
| H  | -0.26683 | -6.14370 | 0.15554  | H | -0.40462 | 0.33599  | -0.56507 |
| H  | -1.89436 | -5.46160 | 0.50308  | S | -1.84184 | -3.46895 | 0.69181  |
| O  | -0.84357 | -0.48623 | -1.70657 | O | -2.32390 | -2.00953 | 0.63756  |
| H  | -1.02768 | -1.30216 | -1.18739 | C | -1.09174 | -3.79469 | -0.91924 |
| H  | -0.39374 | 0.13735  | -1.08584 | H | -0.61468 | -4.77706 | -0.90161 |
| O  | -3.31061 | 0.53881  | -2.51845 | H | -1.89704 | -3.79104 | -1.65523 |
| H  | -2.42491 | 0.18709  | -2.27221 | H | -0.37196 | -3.00662 | -1.14842 |
| H  | -3.91961 | 0.20502  | -1.82522 | C | -0.32905 | -3.44389 | 1.67666  |
| S  | -5.36061 | -1.94576 | -0.62635 | H | -0.61765 | -3.21356 | 2.70329  |
| O  | -4.98861 | -0.46068 | -0.50917 | H | 0.13976  | -4.43035 | 1.64153  |
| C  | -7.07792 | -2.04506 | -0.07796 | H | 0.34137  | -2.67127 | 1.29539  |
| H  | -7.68538 | -1.51921 | -0.81586 | O | -2.94223 | 0.59935  | -2.80611 |
| H  | -7.38537 | -3.09173 | -0.02614 | H | -2.19824 | 0.31272  | -2.23145 |
| H  | -7.16972 | -1.56292 | 0.89744  | H | -3.73445 | 0.56739  | -2.22806 |
| C  | -4.59000 | -2.75097 | 0.79081  | S | -5.78559 | -0.91688 | -0.86231 |
| H  | -4.94335 | -3.78322 | 0.85378  | O | -5.15860 | 0.46567  | -1.09194 |

|                                                  |    |          |          |          |                                                  |   |          |          |          |
|--------------------------------------------------|----|----------|----------|----------|--------------------------------------------------|---|----------|----------|----------|
|                                                  | H  | -3.51101 | -2.73590 | 0.61709  |                                                  | C | -7.56429 | -0.61614 | -0.78373 |
|                                                  | H  | -4.85033 | -2.19637 | 1.69522  |                                                  | H | -7.88368 | -0.29424 | -1.77591 |
|                                                  | C  | -0.54426 | 0.14636  | 2.03493  |                                                  | H | -8.08032 | -1.53957 | -0.51217 |
|                                                  | H  | -0.44037 | -0.37362 | 2.99266  |                                                  | H | -7.76108 | 0.16996  | -0.05189 |
|                                                  | H  | -1.15023 | 1.03961  | 2.19499  |                                                  | C | -5.51109 | -1.29311 | 0.87938  |
|                                                  | H  | -1.03996 | -0.50954 | 1.31919  |                                                  | H | -6.07665 | -2.18911 | 1.14670  |
|                                                  | O  | 1.55112  | 1.32014  | 2.23873  |                                                  | H | -4.44040 | -1.47942 | 0.99721  |
|                                                  |    |          |          |          |                                                  | H | -5.83306 | -0.43856 | 1.47891  |
| <b>TS1<sub>abd</sub></b> ··H <sub>2</sub> O2DMSO | C  | 4.40836  | 1.55811  | -0.30816 | <b>TS1<sub>dbe</sub></b> ··H <sub>2</sub> O2DMSO | C | -4.80797 | -0.68333 | -0.12189 |
|                                                  | C  | 3.13183  | 1.25008  | 0.13077  |                                                  | C | -3.58839 | -0.13721 | -0.48634 |
|                                                  | C  | 2.83785  | -0.05576 | 0.55652  |                                                  | C | -2.53859 | -0.98452 | -0.87298 |
|                                                  | C  | 3.84239  | -1.03785 | 0.53172  |                                                  | C | -2.72765 | -2.37445 | -0.88693 |
|                                                  | C  | 5.11700  | -0.73357 | 0.09053  |                                                  | C | -3.94356 | -2.92248 | -0.51851 |
|                                                  | C  | 5.39296  | 0.56950  | -0.32501 |                                                  | C | -4.97866 | -2.06789 | -0.14060 |
|                                                  | H  | 4.64597  | 2.56102  | -0.64514 |                                                  | H | -5.62758 | -0.04299 | 0.18465  |
|                                                  | H  | 2.35398  | 1.99865  | 0.13571  |                                                  | H | -3.43157 | 0.93151  | -0.46190 |
|                                                  | H  | 3.60327  | -2.04245 | 0.86718  |                                                  | H | -1.90535 | -3.01215 | -1.19721 |
|                                                  | H  | 5.89437  | -1.48897 | 0.07066  |                                                  | H | -4.09693 | -3.99566 | -0.52779 |
|                                                  | O  | 1.62057  | -0.47094 | 0.96162  |                                                  | O | -1.29537 | -0.55755 | -1.19536 |
|                                                  | N  | 6.72483  | 0.90002  | -0.78503 |                                                  | N | -6.25810 | -2.63105 | 0.24303  |
|                                                  | O  | 7.58038  | 0.01106  | -0.80442 |                                                  | O | -6.38765 | -3.85753 | 0.23769  |
|                                                  | O  | 6.95714  | 2.05821  | -1.14112 |                                                  | O | -7.16936 | -1.86338 | 0.56059  |
|                                                  | C  | 0.64443  | 0.46501  | 1.50518  |                                                  | C | -1.08511 | 0.73863  | -1.77905 |
|                                                  | C  | -0.45658 | 3.34289  | 0.29309  |                                                  | O | -1.96322 | 1.23702  | -2.47799 |
|                                                  | C  | -0.83206 | 2.03821  | -0.08299 |                                                  | C | 0.38832  | 0.87901  | -2.06612 |
|                                                  | C  | -2.17778 | 1.81596  | -0.43847 |                                                  | H | 0.60407  | 0.38543  | -3.01929 |
|                                                  | C  | -3.10438 | 2.85451  | -0.42929 |                                                  | H | 0.61990  | 1.94023  | -2.16111 |
|                                                  | C  | -2.70136 | 4.13175  | -0.05136 |                                                  | H | 1.00374  | 0.43279  | -1.28501 |
|                                                  | C  | -1.38260 | 4.38261  | 0.31238  |                                                  | C | -1.24580 | 5.13487  | 0.52663  |
|                                                  | H  | 0.57409  | 3.53224  | 0.57319  |                                                  | O | -1.40777 | 5.92901  | 1.45702  |
|                                                  | H  | -2.49943 | 0.81892  | -0.72932 |                                                  | C | -1.00073 | 5.64903  | -0.87465 |
|                                                  | H  | -4.13654 | 2.66718  | -0.71334 |                                                  | H | 0.02158  | 5.41692  | -1.18477 |
|                                                  | H  | -1.07653 | 5.38416  | 0.60262  |                                                  | H | -1.66485 | 5.17001  | -1.59545 |
|                                                  | Cl | -3.87366 | 5.44745  | -0.03842 |                                                  | H | -1.14520 | 6.73014  | -0.88267 |
|                                                  | O  | 0.05667  | 1.03841  | -0.11928 |                                                  | C | -1.27000 | 3.67796  | 0.76682  |
|                                                  | S  | 0.16620  | -4.22735 | -0.28214 |                                                  | N | -1.10223 | 2.93738  | -0.28701 |
|                                                  | O  | -1.00191 | -3.27200 | -0.56192 |                                                  | O | -1.09773 | 1.63085  | -0.08018 |
|                                                  | C  | 0.63743  | -3.92975 | 1.43434  |                                                  | C | -1.49318 | 3.13942  | 2.14921  |
|                                                  | H  | 1.39735  | -4.65619 | 1.73264  |                                                  | H | -0.58463 | 2.67503  | 2.54520  |
|                                                  | H  | 1.04685  | -2.91977 | 1.48145  |                                                  | H | -1.80014 | 3.94227  | 2.81977  |

|                                    |                               |                                    |                             |
|------------------------------------|-------------------------------|------------------------------------|-----------------------------|
|                                    | H -0.24747 -4.00918 2.06940   |                                    | H -2.26147 2.36083 2.12788  |
|                                    | C -0.59305 -5.84953 -0.05831  |                                    | O 0.75913 0.57117 1.78710   |
|                                    | H -0.99709 -6.15420 -1.02467  |                                    | H 1.52998 0.28434 1.25217   |
|                                    | H 0.16496 -6.56563 0.26650    |                                    | H 0.10111 0.93261 1.15389   |
|                                    | H -1.39584 -5.76932 0.67732   |                                    | S 2.72896 -2.19040 0.84097  |
|                                    | O -0.30287 -0.96992 -2.04939  |                                    | O 2.89930 -0.70117 0.49774  |
|                                    | H -0.57661 -1.76825 -1.55234  |                                    | C 2.46762 -2.25046 2.62849  |
|                                    | H -0.18264 -0.27111 -1.36662  |                                    | H 2.21618 -3.27227 2.92164  |
|                                    | S -4.82141 -2.04244 -0.75422  |                                    | H 3.40573 -1.95451 3.10045  |
|                                    | O -4.21020 -0.86356 -1.51036  |                                    | H 1.66997 -1.55273 2.89188  |
|                                    | C -6.33584 -1.40440 0.00203   |                                    | C 1.04953 -2.62018 0.33151  |
|                                    | H -7.02830 -1.16727 -0.80714  |                                    | H 1.01383 -2.54747 -0.75596 |
|                                    | H -6.77535 -2.16504 0.65097   |                                    | H 0.83357 -3.64525 0.64229  |
|                                    | H -6.09827 -0.50062 0.56741   |                                    | H 0.34848 -1.91075 0.77376  |
|                                    | C -3.85804 -2.22767 0.76237   |                                    | S 6.69985 -0.95148 -0.75010 |
|                                    | H -4.34332 -2.96277 1.40963   |                                    | O 6.89630 -1.90134 0.43161  |
|                                    | H -2.86621 -2.58185 0.47155   |                                    | C 8.32738 -0.22863 -1.06957 |
|                                    | H -3.79185 -1.25714 1.25919   |                                    | H 8.97551 -1.03121 -1.42492 |
|                                    | C -0.55352 -0.36440 1.91029   |                                    | H 8.24492 0.54425 -1.83687  |
|                                    | H -0.32609 -0.86601 2.85672   |                                    | H 8.72224 0.18701 -0.13997  |
|                                    | H -1.40210 0.30234 2.06989    |                                    | C 5.90670 0.52605 -0.08123  |
|                                    | H -0.80805 -1.10744 1.15536   |                                    | H 5.87270 1.29941 -0.85262  |
|                                    | O 1.05401 1.41431 2.17955     |                                    | H 4.89188 0.23726 0.20524   |
|                                    |                               |                                    | H 6.47520 0.86941 0.78632   |
| <b>TS1<sub>abd</sub></b><br>(DMSO) | O -1.01490 1.43645 0.96491    | <b>TS1<sub>dbe</sub></b><br>(DMSO) | C 1.97766 0.88915 0.37631   |
|                                    | C -2.00093 0.62882 0.63967    |                                    | C 0.94881 -0.03916 0.35494  |
|                                    | C -2.16752 -0.59760 1.33303   |                                    | C 1.20623 -1.34019 -0.10196 |
|                                    | C -2.94725 0.91501 -0.37670   |                                    | C 2.49200 -1.69434 -0.53560 |
|                                    | C -3.21546 -1.46671 1.05209   |                                    | C 3.51882 -0.76727 -0.51741 |
|                                    | H -1.45099 -0.84784 2.11164   |                                    | C 3.25131 0.52144 -0.05634  |
|                                    | C -3.99225 0.04246 -0.66482   |                                    | H 1.79686 1.90094 0.72185   |
|                                    | H -2.85087 1.83334 -0.94477   |                                    | H -0.04586 0.23344 0.67968  |
|                                    | C -4.12639 -1.14364 0.05009   |                                    | H 2.66591 -2.70728 -0.88644 |
|                                    | H -3.32047 -2.39472 1.60843   |                                    | H 4.51576 -1.03298 -0.85021 |
|                                    | H -4.70629 0.28999 -1.44631   |                                    | O 0.26582 -2.31023 -0.21452 |
|                                    | Cl -5.45666 -2.24447 -0.31540 |                                    | N 4.32085 1.50055 -0.02988  |
|                                    | C 4.17669 0.36066 0.28888     |                                    | O 5.43862 1.16224 -0.42553  |
|                                    | C 3.29801 1.42580 0.36348     |                                    | O 4.07284 2.63414 0.38673   |
|                                    | C 1.93225 1.24709 0.09092     |                                    | C -0.89638 -2.31485 0.60733 |
|                                    | C 1.44889 -0.02306 -0.26116   |                                    | C -3.15101 0.79406 -0.58628 |

|   |          |          |          |   |          |          |          |
|---|----------|----------|----------|---|----------|----------|----------|
| C | 2.32856  | -1.09034 | -0.33895 | C | -3.47592 | 0.62204  | -2.04059 |
| C | 3.68272  | -0.89465 | -0.06705 | H | -4.13143 | 1.42397  | -2.37984 |
| H | 5.23213  | 0.49335  | 0.49802  | H | -2.56185 | 0.62206  | -2.64396 |
| H | 3.65041  | 2.41628  | 0.63584  | H | -3.96111 | -0.34388 | -2.21506 |
| H | 0.39724  | -0.16461 | -0.46070 | N | -2.39933 | -0.05104 | 0.07674  |
| H | 1.96975  | -2.07825 | -0.60547 | O | -1.93289 | -1.05705 | -0.60420 |
| O | 1.16437  | 2.34839  | 0.24045  | C | -3.66756 | 1.94014  | 0.16271  |
| N | 4.59441  | -2.01683 | -0.15290 | O | -4.39502 | 2.78457  | -0.38026 |
| O | 4.14606  | -3.11932 | -0.47692 | C | -3.29453 | 2.12492  | 1.61889  |
| O | 5.78685  | -1.82877 | 0.10136  | H | -2.54945 | 2.92451  | 1.68489  |
| C | -0.11411 | 2.46649  | -0.39852 | H | -4.17908 | 2.45725  | 2.16718  |
| O | -0.29056 | 1.94516  | -1.49678 | H | -2.87859 | 1.22470  | 2.06619  |
| C | -0.67605 | 3.81166  | -0.00979 | C | -1.73039 | -3.50759 | 0.22465  |
| H | -0.13847 | 4.58695  | -0.56596 | H | -1.26080 | -4.40825 | 0.63358  |
| H | -1.73010 | 3.85101  | -0.28238 | H | -2.72344 | -3.39716 | 0.65886  |
| H | -0.56673 | 3.99288  | 1.05841  | H | -1.80984 | -3.60590 | -0.85719 |
|   |          |          |          | O | -0.86770 | -1.81515 | 1.72205  |

**S12** The optimized geometries for the transition states and minima of all the other reactions studied, obtained with CAM-B3LYP+IDSCRF/DZVP.

| Species              | Cartesian coordinates |          |          | Species  | Cartesian coordinates |          |          |          |          |
|----------------------|-----------------------|----------|----------|----------|-----------------------|----------|----------|----------|----------|
| <b>1bd</b><br>(MeOH) | C                     | -0.61968 | -1.56735 | -0.05984 | <b>1be</b><br>(MeOH)  | N        | -3.20447 | 0.02563  | -0.00001 |
|                      | C                     | 1.32666  | 0.37078  | 0.00717  |                       | C        | -1.75729 | -0.24762 | 0.00624  |
|                      | C                     | -0.98041 | -0.21626 | -0.00785 |                       | C        | -1.32113 | -1.56301 | 0.04563  |
|                      | C                     | 0.71694  | -1.94129 | -0.07957 |                       | C        | -0.88501 | 0.83020  | -0.03389 |
|                      | C                     | 1.70293  | -0.96884 | -0.04033 |                       | C        | 0.47243  | 0.56352  | -0.03243 |
|                      | C                     | 0.00030  | 0.76554  | 0.01595  |                       | H        | -1.24910 | 1.85073  | -0.08158 |
|                      | N                     | -2.37870 | 0.21394  | 0.02340  |                       | H        | -2.03559 | -2.37900 | 0.07413  |
|                      | H                     | 0.96424  | -2.99779 | -0.12845 |                       | C        | 0.04739  | -1.81379 | 0.05181  |
|                      | H                     | 2.75277  | -1.24165 | -0.04997 |                       | N        | 1.39445  | 1.69935  | -0.15090 |
|                      | H                     | -0.27523 | 1.81329  | 0.04795  |                       | H        | 0.42440  | -2.83195 | 0.09585  |
|                      | N                     | 2.36520  | 1.40440  | 0.04651  |                       | O        | -3.96255 | -0.93509 | 0.04204  |
|                      | O                     | -3.22669 | -0.59607 | 0.37703  |                       | O        | -3.56151 | 1.19643  | -0.04559 |
|                      | O                     | -2.61649 | 1.37467  | -0.29622 |                       | C        | 0.93313  | -0.75145 | 0.01998  |
|                      | O                     | 2.00807  | 2.57726  | 0.08835  |                       | O        | 2.49177  | 1.48121  | -0.65082 |
|                      | O                     | 3.53580  | 1.03825  | 0.03474  |                       | O        | 0.99805  | 2.79059  | 0.23276  |
|                      | F                     | -1.53639 | -2.52681 | -0.11887 |                       | N        | 2.36600  | -1.07790 | 0.11699  |
|                      |                       |          |          | O        | 2.84182               | -1.75404 | -0.78240 |          |          |
|                      |                       |          |          | O        | 2.95465               | -0.69223 | 1.11635  |          |          |

|                                  |          |          |          |          |                                  |          |          |          |          |
|----------------------------------|----------|----------|----------|----------|----------------------------------|----------|----------|----------|----------|
| <b>TS1<sub>bdb</sub>...2MeOH</b> | N        | 3.66297  | -1.18541 | -1.08294 | <b>TS1<sub>beb</sub>...2MeOH</b> | C        | -5.13839 | -0.16120 | -0.33686 |
|                                  | C        | 2.37171  | -1.01275 | -0.46375 |                                  | H        | -6.17646 | -0.17109 | 0.01274  |
|                                  | C        | 2.23335  | -0.15528 | 0.64914  |                                  | H        | -5.09336 | 0.38624  | -1.27962 |
|                                  | C        | 1.29606  | -1.72984 | -0.94986 |                                  | H        | -4.79676 | -1.18780 | -0.50419 |
|                                  | C        | 0.04669  | -1.56200 | -0.36621 |                                  | O        | -4.28888 | 0.52902  | 0.58465  |
|                                  | H        | 1.41268  | -2.42064 | -1.77626 |                                  | H        | -4.32691 | 0.09338  | 1.45615  |
|                                  | H        | 3.10100  | 0.35154  | 1.06280  |                                  | C        | -1.77351 | 3.37388  | -0.24576 |
|                                  | C        | 1.00322  | 0.00251  | 1.22647  |                                  | C        | -1.04434 | 2.23738  | 0.47520  |
|                                  | C        | -0.15260 | -0.61802 | 0.68093  |                                  | C        | -1.17603 | 0.82551  | -1.50426 |
|                                  | N        | -1.05463 | -2.32030 | -0.90130 |                                  | C        | -1.91051 | 1.92000  | -2.28248 |
|                                  | H        | 0.87655  | 0.61083  | 2.11639  |                                  | C        | -1.54336 | 3.30612  | -1.75469 |
|                                  | O        | 4.62031  | -0.55073 | -0.62883 |                                  | H        | 0.03918  | 2.36228  | 0.35901  |
|                                  | O        | 3.76324  | -1.95428 | -2.04070 |                                  | H        | -1.26953 | 2.24755  | 1.54243  |
|                                  | O        | -0.80779 | -3.27276 | -1.64344 |                                  | H        | -2.84584 | 3.30292  | -0.02966 |
|                                  | O        | -2.20184 | -1.97349 | -0.60737 |                                  | H        | -1.42576 | 4.32929  | 0.16069  |
|                                  | C        | -4.91869 | 0.09697  | -1.01472 |                                  | H        | -0.09691 | 0.90790  | -1.68112 |
|                                  | H        | -5.88706 | -0.35974 | -0.78181 |                                  | H        | -1.49754 | -0.15864 | -1.85127 |
|                                  | H        | -5.08991 | 1.10804  | -1.38748 |                                  | H        | -1.66322 | 1.82477  | -3.34475 |
|                                  | H        | -4.42044 | -0.49210 | -1.79271 |                                  | H        | -2.99165 | 1.76220  | -2.19008 |
|                                  | O        | -4.10590 | 0.21545  | 0.15463  |                                  | H        | -0.48817 | 3.51243  | -1.97415 |
|                                  | H        | -3.90233 | -0.67562 | 0.49229  |                                  | H        | -2.12968 | 4.07579  | -2.26614 |
|                                  | C        | -1.89362 | 3.39484  | 0.02561  |                                  | N        | -1.40100 | 0.91301  | -0.05481 |
|                                  | C        | -1.14089 | 2.20253  | 0.61962  |                                  | H        | -2.38418 | 0.70672  | 0.16360  |
|                                  | C        | -0.77107 | 1.25728  | -1.59972 |                                  | C        | 4.79818  | 2.72571  | 0.62521  |
|                                  | C        | -1.50423 | 2.42591  | -2.26148 |                                  | H        | 5.79518  | 3.12873  | 0.41194  |
|                                  | C        | -1.41578 | 3.68529  | -1.39789 |                                  | H        | 4.33190  | 2.41268  | -0.31657 |
|                                  | H        | -0.08021 | 2.45621  | 0.73475  |                                  | H        | 4.19206  | 3.51352  | 1.07543  |
|                                  | H        | -1.53190 | 1.94702  | 1.60843  |                                  | O        | 4.85525  | 1.65436  | 1.56561  |
|                                  | H        | -2.96722 | 3.17232  | 0.02036  |                                  | H        | 5.37087  | 0.92399  | 1.17916  |
|                                  | H        | -1.74933 | 4.26785  | 0.67069  |                                  | N        | 3.56292  | -1.17911 | -1.03125 |
|                                  | H        | 0.30469  | 1.46850  | -1.55634 |                                  | C        | 2.29439  | -1.01003 | -0.35305 |
|                                  | H        | -0.90303 | 0.34137  | -2.18307 |                                  | C        | 2.18282  | -0.08314 | 0.69670  |
|                                  | H        | -1.07780 | 2.60177  | -3.25452 |                                  | C        | 1.22136  | -1.79461 | -0.73732 |
|                                  | H        | -2.55591 | 2.15194  | -2.40996 |                                  | C        | 0.00690  | -1.62480 | -0.09412 |
| H                                | -0.37562 | 4.03400  | -1.36891 | H        | 1.31611                          | -2.52788 | -1.52981 |          |          |
| H                                | -2.00706 | 4.49237  | -1.84158 | H        | 3.05102                          | 0.48026  | 1.03054  |          |          |
| N                                | -1.22840 | 1.00625  | -0.22833 | C        | 0.97443                          | 0.07745  | 1.33094  |          |          |
| H                                | -2.19915 | 0.67227  | -0.22444 | N        | -1.11469                         | -2.42728 | -0.52306 |          |          |
| C                                | 4.86653  | 2.61652  | 0.64839  | H        | 0.88591                          | 0.74278  | 2.18427  |          |          |
| H                                | 4.34766  | 3.42840  | 1.16078  | O        | 4.50887                          | -0.47039 | -0.68175 |          |          |

|                                |                                                                                                                                                                                                                                                                                                                                                                                                                                                                                                                                       |                                |                                                                                                                                                                                                                                                                                                                                                                                                                                                                                                                                    |
|--------------------------------|---------------------------------------------------------------------------------------------------------------------------------------------------------------------------------------------------------------------------------------------------------------------------------------------------------------------------------------------------------------------------------------------------------------------------------------------------------------------------------------------------------------------------------------|--------------------------------|------------------------------------------------------------------------------------------------------------------------------------------------------------------------------------------------------------------------------------------------------------------------------------------------------------------------------------------------------------------------------------------------------------------------------------------------------------------------------------------------------------------------------------|
|                                | H 5.85590 2.97302 0.33811<br>H 4.29397 2.33757 -0.24433<br>O 4.96362 1.53406 1.57148<br>H 5.39462 0.78383 1.12550<br>F -1.17572 -0.79082 1.54072                                                                                                                                                                                                                                                                                                                                                                                      |                                | O 3.64172 -2.01829 -1.92833<br>C -0.17866 -0.61846 0.88910<br>O -2.24201 -2.05659 -0.18446<br>O -0.90117 -3.42006 -1.21648<br>N -1.15546 -0.89471 2.00467<br>O -1.78717 0.02820 2.49294<br>O -1.16341 -2.04498 2.42058                                                                                                                                                                                                                                                                                                             |
| <b>2c</b><br>(MeCN)            | C -2.33251 -1.08825 0.40439<br>C -0.84556 -1.22800 0.09917<br>C -0.78501 1.11226 -0.46321<br>C -2.27333 1.19924 -0.14534<br>H -0.27646 -1.10027 1.02729<br>H -0.63370 -2.23188 -0.28227<br>H -2.92566 -1.32897 -0.49175<br>H -2.63846 -1.75933 1.21166<br>H -0.21200 1.39219 0.42836<br>H -0.52875 1.82175 -1.25637<br>H -2.53670 2.17777 0.26546<br>H -2.86443 1.03536 -1.05998<br>N -0.36797 -0.23413 -0.86726<br>H -0.76802 -0.44381 -1.78296<br>O -2.64409 0.23444 0.83745                                                        | <b>2f</b><br>(MeCN)            | N 0.00000 -0.29202 -0.08250<br>H 0.00000 -0.97453 0.67643<br>C 1.21666 0.51190 0.01662<br>C 2.46359 -0.36105 -0.02835<br>H 1.22974 1.12873 0.93230<br>H 1.22711 1.21059 -0.82806<br>H 3.36831 0.25111 0.02925<br>H 2.48319 -1.06352 0.81206<br>H 2.49692 -0.94166 -0.95457<br>C -1.21666 0.51190 0.01663<br>C -2.46359 -0.36105 -0.02834<br>H -1.22711 1.21059 -0.82805<br>H -1.22974 1.12873 0.93230<br>H -3.36831 0.25111 0.02926<br>H -2.49692 -0.94165 -0.95457<br>H -2.48319 -1.06352 0.81206                                 |
| <b>2b</b> ···2H <sub>2</sub> O | O -3.41003 0.02529 -0.31273<br>H -2.41806 0.07240 -0.20792<br>O 0.26600 3.01436 0.36432<br>H -0.19921 3.63070 -0.23132<br>C 1.27196 -0.84348 1.31729<br>C -0.24187 -0.70071 1.14388<br>C -0.00345 -0.39845 -1.26087<br>C 1.51840 -0.53089 -1.16783<br>C 1.91647 -1.38455 0.03869<br>H -0.69269 -1.69529 1.03057<br>H -0.69280 -0.24694 2.03192<br>H 1.69893 0.13889 1.55636<br>H 1.48696 -1.50043 2.16769<br>H -0.44326 -1.37911 -1.48442<br>H -0.28511 0.27017 -2.08032<br>H 1.90993 -0.96393 -2.09529<br>H 1.95916 0.46963 -1.07114 | <b>2f</b> ···2H <sub>2</sub> O | O 0.90400 2.15492 -1.50833<br>H 0.60273 1.41778 -0.90922<br>O -1.13707 -2.37069 -1.07932<br>H -1.78378 -2.16949 -1.78099<br>N 0.08482 0.11857 0.27123<br>H -0.30982 -0.68446 -0.22663<br>H -1.62028 -2.93560 -0.44826<br>H 1.27311 2.83151 -0.91567<br>C 1.26825 -0.33353 1.00855<br>C 2.29081 -0.96671 0.07441<br>H 0.99405 -1.04859 1.80111<br>H 1.70988 0.53544 1.51052<br>H 3.17054 -1.29863 0.63338<br>H 1.86555 -1.83738 -0.43476<br>H 2.61499 -0.25206 -0.68751<br>C -0.95059 0.66739 1.15160<br>C -2.19456 1.05794 0.36459 |

|                                           |   |          |          |          |                                           |   |          |          |          |
|-------------------------------------------|---|----------|----------|----------|-------------------------------------------|---|----------|----------|----------|
|                                           | H | 1.58371  | -2.41816 | -0.12431 |                                           | H | -0.53741 | 1.54919  | 1.65524  |
|                                           | H | 3.00615  | -1.41808 | 0.14255  |                                           | H | -1.22048 | -0.04958 | 1.94391  |
|                                           | N | -0.62422 | 0.10223  | -0.02628 |                                           | H | -2.95652 | 1.47505  | 1.02933  |
|                                           | H | -0.32217 | 1.06910  | 0.12250  |                                           | H | -1.95337 | 1.80562  | -0.39643 |
|                                           | H | 1.21343  | 3.16043  | 0.18586  |                                           | H | -2.62745 | 0.18745  | -0.13866 |
|                                           | H | -3.61084 | -0.91839 | -0.43156 |                                           |   |          |          |          |
| <b>TS1<sub>bdb</sub>..2H<sub>2</sub>O</b> | N | 3.52437  | -0.35848 | -0.94249 | <b>TS1<sub>bdf</sub>..2H<sub>2</sub>O</b> | N | 3.56853  | 0.38688  | 0.41174  |
|                                           | C | 2.29870  | -0.40481 | -0.18305 |                                           | C | 2.21369  | 0.24947  | -0.05692 |
|                                           | C | 1.99886  | 0.62716  | 0.73300  |                                           | C | 1.78333  | -0.97074 | -0.62726 |
|                                           | C | 1.45680  | -1.48793 | -0.34020 |                                           | C | 1.36623  | 1.33624  | 0.01768  |
|                                           | C | 0.27122  | -1.54244 | 0.38304  |                                           | C | 0.05578  | 1.21232  | -0.42892 |
|                                           | H | 1.70929  | -2.29789 | -1.01365 |                                           | H | 1.70940  | 2.28575  | 0.41036  |
|                                           | H | 2.70055  | 1.44187  | 0.89579  |                                           | H | 2.47888  | -1.79821 | -0.74809 |
|                                           | C | 0.83091  | 0.57191  | 1.44326  |                                           | C | 0.49568  | -1.08834 | -1.07062 |
|                                           | C | -0.11886 | -0.46280 | 1.22741  |                                           | C | -0.45257 | -0.03500 | -0.90654 |
|                                           | N | -0.58110 | -2.68638 | 0.19446  |                                           | N | -0.79141 | 2.37085  | -0.36249 |
|                                           | H | 0.59616  | 1.32191  | 2.19219  |                                           | H | 0.16541  | -1.99069 | -1.57523 |
|                                           | O | 4.27837  | 0.60572  | -0.78085 |                                           | O | 4.32270  | -0.58618 | 0.31824  |
|                                           | O | 3.77232  | -1.27860 | -1.72491 |                                           | O | 3.92516  | 1.46719  | 0.88986  |
|                                           | O | -0.14869 | -3.64540 | -0.44933 |                                           | O | -0.27891 | 3.46503  | -0.10909 |
|                                           | O | -1.71615 | -2.65659 | 0.67810  |                                           | O | -2.00333 | 2.22175  | -0.54112 |
|                                           | O | -4.08193 | -1.24152 | -0.25027 |                                           | O | -4.38733 | 0.61582  | 0.39761  |
|                                           | H | -3.75781 | -2.15986 | -0.21507 |                                           | H | -4.19650 | 1.54895  | 0.18974  |
|                                           | C | -3.26077 | 2.46748  | 0.14900  |                                           | N | -1.74567 | -0.77670 | 0.57663  |
|                                           | C | -2.17406 | 1.69057  | 0.89539  |                                           | H | -2.60579 | -0.21689 | 0.50926  |
|                                           | C | -1.22579 | 0.88843  | -1.20573 |                                           | O | 3.87174  | -3.50112 | -0.95437 |
|                                           | C | -2.27798 | 1.64983  | -2.01498 |                                           | H | 4.54402  | -2.97369 | -0.48646 |
|                                           | C | -2.77947 | 2.87256  | -1.24505 |                                           | H | -4.99613 | 0.64130  | 1.15958  |
|                                           | H | -1.31567 | 2.34786  | 1.08050  |                                           | H | 3.69533  | -4.25909 | -0.36763 |
|                                           | H | -2.53843 | 1.33851  | 1.86368  |                                           | C | -2.08629 | -2.19092 | 0.32384  |
|                                           | H | -4.15547 | 1.83946  | 0.06549  |                                           | C | -2.93347 | -2.41298 | -0.92232 |
|                                           | H | -3.53949 | 3.34857  | 0.73663  |                                           | H | -2.63053 | -2.57352 | 1.19647  |
|                                           | H | -0.32765 | 1.50718  | -1.08795 |                                           | H | -1.15130 | -2.76009 | 0.27038  |
|                                           | H | -0.93072 | -0.02804 | -1.72527 |                                           | H | -3.26636 | -3.45435 | -0.94460 |
|                                           | H | -1.84669 | 1.94436  | -2.97745 |                                           | H | -3.81864 | -1.77138 | -0.90666 |
|                                           | H | -3.11765 | 0.97878  | -2.23136 |                                           | H | -2.38612 | -2.21423 | -1.84444 |
|                                           | H | -1.96564 | 3.60298  | -1.15122 |                                           | C | -1.11499 | -0.59948 | 1.90077  |
|                                           | H | -3.58459 | 3.36642  | -1.79818 |                                           | C | -1.54034 | 0.67752  | 2.61386  |
|                                           | N | -1.69415 | 0.52603  | 0.13734  |                                           | H | -0.02710 | -0.62866 | 1.77265  |
|                                           | H | -2.45728 | -0.15782 | 0.06003  |                                           | H | -1.37057 | -1.45543 | 2.53461  |

|                                            |                              |                                            |                               |
|--------------------------------------------|------------------------------|--------------------------------------------|-------------------------------|
|                                            | O 4.14848 3.06741 1.11094    |                                            | H -1.04945 0.72890 3.58929    |
|                                            | H 4.63961 2.65665 0.37752    |                                            | H -1.27181 1.58004 2.06226    |
|                                            | F -0.96667 -0.68585 2.24678  |                                            | H -2.62130 0.69227 2.77680    |
|                                            | H -4.59970 -1.17966 -1.07424 |                                            | F -1.44828 -0.00856 -1.81658  |
|                                            | H 3.92059 3.96006 0.79365    |                                            |                               |
| <b>TS1<sub>baf</sub></b><br>(MeCN)         | N -4.02982 -0.56410 0.51189  | <b>TS1<sub>baf</sub></b><br>(MeCN)         | N 4.04163 0.75843 0.74436     |
|                                            | C -2.77442 -0.15029 -0.05988 |                                            | C 2.83829 0.23530 0.15765     |
|                                            | C -2.61432 1.17635 -0.51894  |                                            | C 2.72028 -1.14921 -0.09960   |
|                                            | C -1.75349 -1.07075 -0.18967 |                                            | C 1.81925 1.09829 -0.18802    |
|                                            | C -0.54018 -0.67019 -0.73462 |                                            | C 0.65041 0.59263 -0.74369    |
|                                            | H -1.88604 -2.09962 0.12363  |                                            | H 1.91294 2.16545 -0.02420    |
|                                            | H -3.44903 1.86695 -0.46485  |                                            | H 3.55162 -1.81005 0.12131    |
|                                            | C -1.42672 1.56939 -1.06673  |                                            | C 1.58446 -1.64391 -0.67085   |
|                                            | C -0.30734 0.68582 -1.12240  |                                            | C 0.44736 -0.81211 -0.95334   |
|                                            | N 0.50546 -1.65150 -0.85718  |                                            | N -0.39424 1.53896 -1.03834   |
|                                            | H -1.30305 2.56695 -1.47774  |                                            | H 1.52475 -2.69511 -0.93317   |
|                                            | O -4.93289 0.27213 0.60110   |                                            | O 4.94444 -0.03474 1.02836    |
|                                            | O -4.15278 -1.73208 0.89000  |                                            | O 4.12651 1.97406 0.94309     |
|                                            | O 0.21201 -2.84386 -0.75569  |                                            | O -0.09765 2.72578 -1.18643   |
|                                            | O 1.65960 -1.25252 -1.04357  |                                            | O -1.55603 1.12079 -1.10191   |
|                                            | N 1.02910 1.43895 0.25780    |                                            | N -0.97736 -1.38841 0.39445   |
|                                            | H 1.71990 0.68656 0.30967    |                                            | H -1.79094 -0.90241 0.00968   |
|                                            | C 1.67068 2.68536 -0.21644   |                                            | Cl -0.46910 -1.32957 -2.38825 |
|                                            | C 2.96878 2.42764 -0.96757   |                                            | C -1.18441 -2.85406 0.37741   |
|                                            | H 1.86661 3.33975 0.63857    |                                            | C -2.65382 -3.25796 0.33088   |
|                                            | H 0.95424 3.21257 -0.85539   |                                            | H -0.69002 -3.27592 1.25533   |
|                                            | H 3.38352 3.37491 -1.32149   |                                            | H -0.67797 -3.26601 -0.49955  |
|                                            | H 3.71237 1.96075 -0.31387   |                                            | H -2.73510 -4.34778 0.29596   |
|                                            | H 2.81095 1.77925 -1.83096   |                                            | H -3.20522 -2.90370 1.20472   |
|                                            | C 0.32603 1.56904 1.54524    |                                            | H -3.13676 -2.85878 -0.56625  |
|                                            | C 1.24749 1.67859 2.75673    |                                            | C -0.62748 -0.82173 1.70636   |
|                                            | H -0.31731 0.69182 1.66074   |                                            | C -1.68038 -1.01721 2.79380   |
|                                            | H -0.32828 2.44222 1.47462   |                                            | H -0.45403 0.24747 1.56313    |
|                                            | H 0.64844 1.76019 3.66775    |                                            | H 0.32353 -1.27108 2.00901    |
|                                            | H 1.87937 0.78997 2.84903    |                                            | H -1.34926 -0.51679 3.70788   |
|                                            | H 1.89608 2.55679 2.70586    |                                            | H -2.63946 -0.58089 2.49977   |
|                                            | F 0.55150 0.92282 -2.13945   |                                            | H -1.83642 -2.07208 3.03137   |
| <b>TS1<sub>bab</sub> ··2H<sub>2</sub>O</b> | N -3.73824 -0.62806 0.66130  | <b>TS1<sub>baf</sub> ··2H<sub>2</sub>O</b> | N 3.78387 0.08695 -0.38261    |
|                                            | C -2.42464 -0.72765 0.08155  |                                            | C 2.36638 0.20175 -0.58316    |
|                                            | C -2.12996 -0.05562 -1.12443 |                                            | C 1.71995 -0.58262 -1.56738   |



|                                           |    |          |          |          |                                           |    |          |          |          |
|-------------------------------------------|----|----------|----------|----------|-------------------------------------------|----|----------|----------|----------|
|                                           | C  | -1.47629 | -1.51968 | 0.69790  |                                           | C  | 1.65579  | 1.12849  | 0.15262  |
|                                           | C  | -0.20229 | -1.61505 | 0.15163  |                                           | C  | 0.28126  | 1.23533  | -0.01854 |
|                                           | H  | -1.70948 | -2.06459 | 1.60468  |                                           | H  | 2.15430  | 1.77234  | 0.86725  |
|                                           | H  | -2.89725 | 0.51593  | -1.64110 |                                           | H  | 2.29394  | -1.24541 | -2.20985 |
|                                           | C  | -0.87981 | -0.16645 | -1.66664 |                                           | C  | 0.37296  | -0.46298 | -1.74563 |
|                                           | C  | 0.17617  | -0.87600 | -1.01261 |                                           | C  | -0.44672 | 0.37054  | -0.90626 |
|                                           | N  | 0.74789  | -2.43252 | 0.86420  |                                           | N  | -0.39828 | 2.21863  | 0.78339  |
|                                           | H  | -0.66490 | 0.29118  | -2.62658 |                                           | H  | -0.11067 | -0.99953 | -2.55491 |
|                                           | O  | -4.58284 | 0.06870  | 0.08834  |                                           | O  | 4.41282  | -0.72853 | -1.06803 |
|                                           | O  | -3.97431 | -1.23789 | 1.70795  |                                           | O  | 4.32620  | 0.80000  | 0.46681  |
|                                           | O  | 0.32326  | -3.28620 | 1.64755  |                                           | O  | 0.25641  | 3.14751  | 1.26503  |
|                                           | O  | 1.95012  | -2.22630 | 0.68069  |                                           | O  | -1.60937 | 2.07720  | 0.98111  |
|                                           | O  | 4.22017  | -0.34245 | -0.08437 |                                           | O  | -4.03733 | 0.30321  | 1.03849  |
|                                           | H  | 4.11419  | -1.29418 | 0.09854  |                                           | H  | -4.89536 | 0.10217  | 0.61965  |
|                                           | C  | 2.39064  | 2.92850  | -0.77078 |                                           | N  | -1.48009 | -0.95587 | 0.27729  |
|                                           | C  | 1.52562  | 1.76634  | -1.26459 |                                           | H  | -2.39133 | -0.50250 | 0.43816  |
|                                           | C  | 0.94620  | 1.14765  | 1.02096  |                                           | O  | 3.60085  | -2.50790 | -3.45661 |
|                                           | C  | 1.78750  | 2.29557  | 1.58466  |                                           | H  | 4.29739  | -2.16681 | -2.86860 |
|                                           | C  | 1.89022  | 3.44319  | 0.57931  |                                           | H  | -3.88057 | 1.24917  | 0.86289  |
|                                           | H  | 0.50794  | 2.12280  | -1.46247 |                                           | H  | 3.59501  | -3.47089 | -3.30844 |
|                                           | H  | 1.92324  | 1.35234  | -2.19495 |                                           | C  | -1.66341 | -2.25355 | -0.40096 |
|                                           | H  | 3.42859  | 2.58823  | -0.67890 |                                           | C  | -2.75672 | -2.25661 | -1.46054 |
|                                           | H  | 2.37806  | 3.72559  | -1.52140 |                                           | H  | -1.89841 | -3.01169 | 0.35253  |
|                                           | H  | -0.09176 | 1.47536  | 0.88549  |                                           | H  | -0.69877 | -2.53983 | -0.83486 |
|                                           | H  | 0.94106  | 0.30253  | 1.71421  |                                           | H  | -2.88911 | -3.27660 | -1.83101 |
|                                           | H  | 1.34104  | 2.63683  | 2.52432  |                                           | H  | -3.71109 | -1.92381 | -1.04282 |
|                                           | H  | 2.78963  | 1.92004  | 1.82330  |                                           | H  | -2.51931 | -1.61767 | -2.31188 |
|                                           | H  | 0.90280  | 3.90434  | 0.45044  |                                           | C  | -0.78356 | -1.10684 | 1.56821  |
|                                           | H  | 2.55625  | 4.22352  | 0.96053  |                                           | C  | -1.66770 | -1.65910 | 2.68483  |
|                                           | N  | 1.43833  | 0.68070  | -0.27993 |                                           | H  | -0.41188 | -0.12813 | 1.87384  |
|                                           | H  | 2.36363  | 0.24511  | -0.17149 |                                           | H  | 0.08968  | -1.74591 | 1.40459  |
|                                           | O  | -4.48831 | 1.67739  | -2.57624 |                                           | H  | -1.09698 | -1.68692 | 3.61732  |
|                                           | H  | -5.02668 | 1.46564  | -1.79294 |                                           | H  | -2.54152 | -1.01997 | 2.83263  |
|                                           | Cl | 1.38809  | -1.53033 | -2.11855 |                                           | H  | -2.01396 | -2.67495 | 2.47878  |
|                                           | H  | 4.79205  | -0.00720 | 0.63151  |                                           | Cl | -1.85122 | 1.05204  | -1.75696 |
|                                           | H  | -4.40889 | 2.64875  | -2.57218 |                                           |    |          |          |          |
| <b>TS1<sub>bac</sub></b><br><b>(MeCN)</b> | N  | -3.92882 | 0.31772  | -1.06724 | <b>TS1<sub>bbb</sub></b><br><b>(MeCN)</b> | N  | -4.10022 | 0.52585  | -1.18036 |
|                                           | C  | -2.76821 | 0.02712  | -0.27154 |                                           | C  | -2.90796 | 0.18840  | -0.44845 |
|                                           | C  | -2.58724 | -1.26477 | 0.27121  |                                           | C  | -2.71824 | -1.12733 | 0.02437  |
|                                           | C  | -1.85578 | 1.02802  | -0.00735 |                                           | C  | -1.97345 | 1.16888  | -0.18353 |

|                                              |    |          |          |          |                                              |    |          |          |          |
|----------------------------------------------|----|----------|----------|----------|----------------------------------------------|----|----------|----------|----------|
|                                              | C  | -0.72741 | 0.74630  | 0.75201  |                                              | C  | -0.81770 | 0.84123  | 0.51448  |
|                                              | H  | -2.00266 | 2.03107  | -0.39055 |                                              | H  | -2.12430 | 2.18815  | -0.51911 |
|                                              | H  | -3.34341 | -2.02600 | 0.11147  |                                              | H  | -3.48643 | -1.87526 | -0.14044 |
|                                              | C  | -1.49058 | -1.53876 | 1.03529  |                                              | C  | -1.59154 | -1.44305 | 0.73086  |
|                                              | C  | -0.45078 | -0.57013 | 1.25498  |                                              | C  | -0.54204 | -0.49303 | 0.94608  |
|                                              | N  | 0.20946  | 1.82057  | 0.95354  |                                              | N  | 0.14206  | 1.89960  | 0.71240  |
|                                              | H  | -1.39195 | -2.50745 | 1.51408  |                                              | H  | -1.48211 | -2.43613 | 1.15315  |
|                                              | O  | -4.73536 | -0.59361 | -1.27692 |                                              | O  | -4.92672 | -0.36642 | -1.39116 |
|                                              | O  | -4.07477 | 1.46088  | -1.51051 |                                              | O  | -4.24930 | 1.68791  | -1.56860 |
|                                              | O  | -0.18180 | 2.98268  | 0.83218  |                                              | O  | -0.24454 | 3.06892  | 0.65960  |
|                                              | O  | 1.38227  | 1.52675  | 1.21255  |                                              | O  | 1.32134  | 1.58536  | 0.89870  |
|                                              | Cl | 0.32839  | -0.72483 | 2.84820  |                                              | C  | 2.30289  | -3.11660 | -1.11349 |
|                                              | C  | 2.52240  | -3.16180 | -0.48149 |                                              | C  | 1.17980  | -2.61460 | -0.20436 |
|                                              | C  | 1.37768  | -2.67719 | 0.40160  |                                              | C  | 0.79489  | -0.68433 | -1.65055 |
|                                              | C  | 0.94661  | -0.93355 | -1.22839 |                                              | C  | 1.90216  | -1.13562 | -2.60466 |
|                                              | C  | 2.10050  | -1.48351 | -2.06012 |                                              | C  | 2.08748  | -2.65224 | -2.55390 |
|                                              | H  | 0.46197  | -3.21412 | 0.13807  |                                              | H  | 0.22737  | -3.06188 | -0.50942 |
|                                              | H  | 1.60348  | -2.85647 | 1.45485  |                                              | H  | 1.36389  | -2.88955 | 0.83660  |
|                                              | H  | 3.46686  | -2.69147 | -0.17159 |                                              | H  | 3.26365  | -2.74262 | -0.73962 |
|                                              | H  | 2.62854  | -4.24503 | -0.39447 |                                              | H  | 2.34085  | -4.20900 | -1.05559 |
|                                              | H  | 0.00478  | -1.39193 | -1.54588 |                                              | H  | -0.17254 | -1.08482 | -1.97521 |
|                                              | H  | 0.87386  | 0.14850  | -1.35962 |                                              | H  | 0.72032  | 0.40534  | -1.63794 |
|                                              | H  | 1.89537  | -1.34294 | -3.12322 |                                              | H  | 1.65144  | -0.80466 | -3.61737 |
|                                              | H  | 3.03123  | -0.95378 | -1.81035 |                                              | H  | 2.83830  | -0.63612 | -2.32756 |
|                                              | N  | 1.13108  | -1.23915 | 0.19905  |                                              | H  | 1.19718  | -3.14316 | -2.96614 |
|                                              | H  | 1.90077  | -0.68270 | 0.58590  |                                              | H  | 2.93305  | -2.95165 | -3.18039 |
|                                              | O  | 2.26465  | -2.87808 | -1.84898 |                                              | N  | 1.01897  | -1.15367 | -0.27533 |
|                                              |    |          |          |          |                                              | H  | 1.83337  | -0.68298 | 0.12875  |
|                                              |    |          |          |          |                                              | Br | 0.40136  | -0.76740 | 2.62453  |
| <b>TS1<sub>bbb</sub> ··· 2H<sub>2</sub>O</b> | N  | -3.89935 | -0.87124 | 0.62081  | <b>TS1<sub>bbf</sub> ··· 2H<sub>2</sub>O</b> | N  | 3.77953  | 0.07251  | -0.38861 |
|                                              | C  | -2.53658 | -0.87236 | 0.15568  |                                              | C  | 2.36135  | 0.19108  | -0.58465 |
|                                              | C  | -2.21915 | -0.33518 | -1.10975 |                                              | C  | 1.70961  | -0.58836 | -1.56863 |
|                                              | C  | -1.55815 | -1.43893 | 0.94778  |                                              | C  | 1.65524  | 1.11515  | 0.15870  |
|                                              | C  | -0.23915 | -1.44042 | 0.51039  |                                              | C  | 0.28014  | 1.22552  | -0.00908 |
|                                              | H  | -1.80279 | -1.87736 | 1.90772  |                                              | H  | 2.15715  | 1.75347  | 0.87594  |
|                                              | H  | -2.99964 | 0.06472  | -1.75267 |                                              | H  | 2.27942  | -1.25076 | -2.21506 |
|                                              | C  | -0.92111 | -0.35873 | -1.54326 |                                              | C  | 0.36152  | -0.46408 | -1.74282 |
|                                              | C  | 0.14702  | -0.83559 | -0.72300 |                                              | C  | -0.45069 | 0.37004  | -0.89944 |
|                                              | N  | 0.73506  | -2.01354 | 1.40727  |                                              | N  | -0.39270 | 2.20662  | 0.80239  |
|                                              | H  | -0.68447 | -0.00831 | -2.54215 |                                              | H  | -0.12148 | -1.00011 | -2.55258 |

|                                    |    |          |          |          |                                    |    |          |          |          |
|------------------------------------|----|----------|----------|----------|------------------------------------|----|----------|----------|----------|
|                                    | O  | -4.76898 | -0.38842 | -0.11132 |                                    | O  | 4.40542  | -0.74044 | -1.07998 |
|                                    | O  | -4.14920 | -1.35023 | 1.73035  |                                    | O  | 4.32527  | 0.77979  | 0.46296  |
|                                    | O  | 0.34925  | -2.79972 | 2.27645  |                                    | O  | 0.26598  | 3.13236  | 1.28445  |
|                                    | O  | 1.91309  | -1.67133 | 1.28316  |                                    | O  | -1.60276 | 2.06561  | 1.00606  |
|                                    | O  | 4.02239  | 0.39380  | 0.52487  |                                    | O  | -4.06274 | 0.29474  | 1.04940  |
|                                    | H  | 4.01603  | -0.51791 | 0.87017  |                                    | H  | -4.90427 | 0.12353  | 0.58615  |
|                                    | C  | 1.89930  | 3.22393  | -0.90496 |                                    | N  | -1.49818 | -0.96093 | 0.28164  |
|                                    | C  | 1.23278  | 1.89841  | -1.28152 |                                    | H  | -2.41481 | -0.51657 | 0.43570  |
|                                    | C  | 0.49830  | 1.54509  | 1.01474  |                                    | O  | 3.61714  | -2.49151 | -3.45625 |
|                                    | C  | 1.13305  | 2.86515  | 1.46039  |                                    | H  | 4.28492  | -2.16153 | -2.83009 |
|                                    | C  | 1.20353  | 3.85819  | 0.29978  |                                    | H  | -3.88061 | 1.24209  | 0.90791  |
|                                    | H  | 0.20569  | 2.08548  | -1.61645 |                                    | H  | 3.62149  | -3.45934 | -3.34428 |
|                                    | H  | 1.76908  | 1.41137  | -2.10000 |                                    | C  | -1.65871 | -2.26605 | -0.38827 |
|                                    | H  | 2.95477  | 3.04060  | -0.67268 |                                    | C  | -2.76110 | -2.30323 | -1.43720 |
|                                    | H  | 1.87134  | 3.89471  | -1.76997 |                                    | H  | -1.86824 | -3.02486 | 0.37185  |
|                                    | H  | -0.55200 | 1.70787  | 0.74334  |                                    | H  | -0.69175 | -2.53290 | -0.82938 |
|                                    | H  | 0.52324  | 0.81679  | 1.82944  |                                    | H  | -2.87271 | -3.32921 | -1.79795 |
|                                    | H  | 0.55279  | 3.27629  | 2.29289  |                                    | H  | -3.71941 | -1.98945 | -1.01369 |
|                                    | H  | 2.14210  | 2.66564  | 1.84006  |                                    | H  | -2.54614 | -1.66639 | -2.29593 |
|                                    | H  | 0.18745  | 4.16055  | 0.01620  |                                    | C  | -0.80579 | -1.09760 | 1.57675  |
|                                    | H  | 1.72914  | 4.76701  | 0.60905  |                                    | C  | -1.68634 | -1.66096 | 2.69078  |
|                                    | N  | 1.17332  | 0.96428  | -0.15090 |                                    | H  | -0.45080 | -0.11351 | 1.88320  |
|                                    | H  | 2.12579  | 0.67323  | 0.10430  |                                    | H  | 0.07770  | -1.72383 | 1.41865  |
|                                    | O  | -4.60774 | 1.05195  | -2.92759 |                                    | H  | -1.11888 | -1.67756 | 3.62552  |
|                                    | H  | -5.18675 | 0.87506  | -2.16465 |                                    | H  | -2.57042 | -1.03494 | 2.83347  |
|                                    | Br | 1.62524  | -1.56605 | -1.73754 |                                    | H  | -2.01618 | -2.68253 | 2.48623  |
|                                    | H  | 4.43519  | 0.92979  | 1.22789  |                                    | Br | -1.96113 | 1.14803  | -1.85603 |
|                                    | H  | -4.54607 | 2.02338  | -2.97578 |                                    |    |          |          |          |
| <b>TS1<sub>bbf</sub></b><br>(MeCN) | N  | 4.22008  | 0.84478  | 0.58085  | <b>TS1<sub>bbc</sub></b><br>(MeCN) | N  | -4.05464 | 0.45477  | -1.06841 |
|                                    | C  | 2.95362  | 0.28107  | 0.19699  |                                    | C  | -2.83766 | 0.06431  | -0.40931 |
|                                    | C  | 2.72096  | -1.10372 | 0.34719  |                                    | C  | -2.56347 | -1.30192 | -0.18154 |
|                                    | C  | 1.98473  | 1.09624  | -0.34965 |                                    | C  | -1.96042 | 1.03446  | 0.03016  |
|                                    | C  | 0.75625  | 0.55374  | -0.70874 |                                    | C  | -0.77911 | 0.65731  | 0.65699  |
|                                    | H  | 2.16304  | 2.15538  | -0.49413 |                                    | H  | -2.17500 | 2.08690  | -0.11434 |
|                                    | H  | 3.50952  | -1.74370 | 0.72832  |                                    | H  | -3.28764 | -2.05306 | -0.47848 |
|                                    | C  | 1.52479  | -1.64145 | -0.03365 |                                    | C  | -1.41360 | -1.67258 | 0.45551  |
|                                    | C  | 0.44490  | -0.82959 | -0.51480 |                                    | C  | -0.41707 | -0.71587 | 0.84463  |
|                                    | N  | -0.22939 | 1.46852  | -1.22719 |                                    | N  | 0.11793  | 1.71593  | 1.04428  |
|                                    | H  | 1.37895  | -2.71516 | 0.01966  |                                    | H  | -1.24484 | -2.71725 | 0.69420  |
|                                    | O  | 5.07487  | 0.08949  | 1.05298  |                                    | O  | -4.82838 | -0.43356 | -1.43769 |

|                     |    |          |          |          |                                   |    |          |          |          |
|---------------------|----|----------|----------|----------|-----------------------------------|----|----------|----------|----------|
|                     | O  | 4.40263  | 2.05579  | 0.42626  |                                   | O  | -4.27755 | 1.65668  | -1.24036 |
|                     | O  | 0.14670  | 2.53689  | -1.71248 |                                   | O  | -0.33274 | 2.85201  | 1.20074  |
|                     | O  | -1.41999 | 1.15048  | -1.13551 |                                   | O  | 1.31575  | 1.44026  | 1.17499  |
|                     | N  | -0.97388 | -0.89772 | 0.98082  |                                   | Br | 0.51234  | -1.22101 | 2.48536  |
|                     | H  | -1.76978 | -0.47881 | 0.49429  |                                   | C  | 2.56083  | -2.68778 | -1.59698 |
|                     | C  | -1.27589 | -2.28653 | 1.38993  |                                   | C  | 1.44859  | -2.47757 | -0.57491 |
|                     | C  | -2.76884 | -2.57309 | 1.51036  |                                   | C  | 0.89641  | -0.40231 | -1.69843 |
|                     | H  | -0.76248 | -2.48070 | 2.33436  |                                   | C  | 2.02267  | -0.68572 | -2.68699 |
|                     | H  | -0.84562 | -2.96748 | 0.65036  |                                   | H  | 0.53482  | -2.96540 | -0.92636 |
|                     | H  | -2.92151 | -3.61846 | 1.79242  |                                   | H  | 1.72946  | -2.90521 | 0.38990  |
|                     | H  | -3.24814 | -1.94400 | 2.26376  |                                   | H  | 3.50778  | -2.27679 | -1.21797 |
|                     | H  | -3.27266 | -2.40896 | 0.55300  |                                   | H  | 2.69627  | -3.75430 | -1.78788 |
|                     | C  | -0.52133 | -0.01138 | 2.06401  |                                   | H  | -0.04746 | -0.80136 | -2.08319 |
|                     | C  | -1.52234 | 0.18506  | 3.19963  |                                   | H  | 0.79018  | 0.67509  | -1.55356 |
|                     | H  | -0.29214 | 0.95878  | 1.61682  |                                   | H  | 1.76382  | -0.29230 | -3.67204 |
|                     | H  | 0.41623  | -0.42487 | 2.44908  |                                   | H  | 2.95066  | -0.20169 | -2.34960 |
|                     | H  | -1.11137 | 0.89686  | 3.92082  |                                   | N  | 1.15632  | -1.04537 | -0.40176 |
|                     | H  | -2.46846 | 0.58987  | 2.82865  |                                   | H  | 1.92657  | -0.57278 | 0.08217  |
|                     | H  | -1.72793 | -0.74594 | 3.73310  |                                   | O  | 2.23134  | -2.08201 | -2.83850 |
|                     | Br | -0.64526 | -1.73184 | -1.85929 |                                   |    |          |          |          |
| <b>1e</b><br>(MeCN) | S  | -3.80210 | 0.80365  | -0.10643 | <b>TS1<sub>eb</sub></b><br>(MeCN) | S  | 1.29269  | -0.77467 | -0.77435 |
|                     | O  | -2.34950 | 0.81790  | -0.15419 |                                   | O  | 1.64232  | -0.83961 | -2.17835 |
|                     | O  | -4.52282 | 2.06503  | -0.06126 |                                   | O  | 0.81333  | -1.87604 | 0.03892  |
|                     | O  | -4.25261 | -0.07994 | 1.21602  |                                   | O  | -0.85308 | -0.44244 | -1.61902 |
|                     | C  | -3.90631 | 0.43193  | 2.46911  |                                   | C  | -2.00627 | -0.43402 | -1.04403 |
|                     | C  | -2.69687 | 0.04779  | 3.03926  |                                   | C  | -2.26380 | -1.06720 | 0.21552  |
|                     | C  | -4.80896 | 1.26067  | 3.12771  |                                   | C  | -3.11247 | 0.22915  | -1.67169 |
|                     | C  | -2.37851 | 0.50624  | 4.31086  |                                   | C  | -3.51253 | -1.03028 | 0.79216  |
|                     | H  | -2.02301 | -0.60498 | 2.49332  |                                   | H  | -1.45492 | -1.59927 | 0.70273  |
|                     | C  | -4.49330 | 1.72081  | 4.39937  |                                   | C  | -4.35794 | 0.26249  | -1.09393 |
|                     | H  | -5.74469 | 1.53216  | 2.64923  |                                   | H  | -2.93440 | 0.71114  | -2.62904 |
|                     | C  | -3.28261 | 1.33587  | 4.96660  |                                   | C  | -4.56923 | -0.36491 | 0.14799  |
|                     | H  | -1.44647 | 0.22602  | 4.78847  |                                   | H  | -3.69409 | -1.51759 | 1.74417  |
|                     | H  | -5.17282 | 2.36614  | 4.94445  |                                   | H  | -5.18274 | 0.77058  | -1.58198 |
|                     | C  | -4.46689 | -0.26265 | -1.34527 |                                   | C  | 0.95249  | 0.84341  | -0.14740 |
|                     | C  | -3.65898 | -1.27233 | -1.86346 |                                   | C  | 1.18990  | 1.93899  | -0.97421 |
|                     | C  | -5.77767 | -0.05905 | -1.77085 |                                   | C  | 0.47644  | 0.96864  | 1.15444  |
|                     | C  | -4.19087 | -2.10710 | -2.84150 |                                   | C  | 0.94904  | 3.20954  | -0.46327 |
|                     | H  | -2.63722 | -1.39708 | -1.51713 |                                   | H  | 1.53678  | 1.80118  | -1.99395 |
|                     | C  | -6.29288 | -0.90339 | -2.74959 |                                   | C  | 0.24145  | 2.25043  | 1.64556  |

|                      |   |          |          |          |                                  |   |          |          |          |
|----------------------|---|----------|----------|----------|----------------------------------|---|----------|----------|----------|
|                      | H | -6.37726 | 0.74467  | -1.35368 |                                  | H | 0.28359  | 0.09392  | 1.76801  |
|                      | C | -5.50226 | -1.92295 | -3.28017 |                                  | C | 0.47852  | 3.36405  | 0.84177  |
|                      | H | -3.57897 | -2.89971 | -3.26257 |                                  | H | 1.12362  | 4.07999  | -1.08928 |
|                      | H | -7.31155 | -0.76227 | -3.09935 |                                  | H | -0.13196 | 2.37389  | 2.65814  |
|                      | H | -5.91064 | -2.57766 | -4.04558 |                                  | H | 0.29120  | 4.36066  | 1.23245  |
|                      | N | -2.94840 | 1.81998  | 6.30870  |                                  | N | -5.85568 | -0.32962 | 0.74945  |
|                      | O | -3.75427 | 2.55197  | 6.87779  |                                  | O | -6.78231 | 0.25808  | 0.16483  |
|                      | O | -1.87818 | 1.47100  | 6.80055  |                                  | O | -6.02819 | -0.88655 | 1.84770  |
|                      |   |          |          |          |                                  | C | 5.53475  | -0.20169 | -0.39226 |
|                      |   |          |          |          |                                  | C | 4.08660  | 0.11951  | -0.75087 |
|                      |   |          |          |          |                                  | C | 3.30594  | -0.90472 | 1.36582  |
|                      |   |          |          |          |                                  | C | 4.74298  | -1.24211 | 1.75258  |
|                      |   |          |          |          |                                  | C | 5.73308  | -0.26374 | 1.12173  |
|                      |   |          |          |          |                                  | H | 3.80310  | 1.10566  | -0.37586 |
|                      |   |          |          |          |                                  | H | 3.91967  | 0.08676  | -1.82816 |
|                      |   |          |          |          |                                  | H | 5.81770  | -1.15690 | -0.85032 |
|                      |   |          |          |          |                                  | H | 6.17092  | 0.56640  | -0.84118 |
|                      |   |          |          |          |                                  | H | 3.02694  | 0.08373  | 1.73772  |
|                      |   |          |          |          |                                  | H | 2.59918  | -1.64213 | 1.74816  |
|                      |   |          |          |          |                                  | H | 4.81139  | -1.22201 | 2.84397  |
|                      |   |          |          |          |                                  | H | 4.97154  | -2.26741 | 1.43818  |
|                      |   |          |          |          |                                  | H | 5.58744  | 0.73416  | 1.55214  |
|                      |   |          |          |          |                                  | H | 6.75815  | -0.56464 | 1.35407  |
|                      |   |          |          |          |                                  | N | 3.16110  | -0.87099 | -0.12122 |
|                      |   |          |          |          |                                  | H | 3.40207  | -1.80877 | -0.48603 |
| <b>1dc</b><br>(MeCN) | C | -2.66919 | -1.73924 | 0.09767  | <b>1fa</b><br>(H <sub>2</sub> O) | C | -2.79209 | -0.24900 | 1.22077  |
|                      | C | -1.28727 | -1.75032 | -0.01079 |                                  | C | -1.41458 | -0.42314 | 1.22012  |
|                      | C | -0.57981 | -0.56806 | -0.20298 |                                  | C | -0.74186 | -0.49689 | 0.00547  |
|                      | C | -1.28263 | 0.64245  | -0.28234 |                                  | C | -1.40736 | -0.40381 | -1.21196 |
|                      | C | -2.66225 | 0.67618  | -0.15053 |                                  | C | -2.78469 | -0.22948 | -1.21802 |
|                      | C | -3.33463 | -0.52066 | 0.02972  |                                  | C | -3.45358 | -0.15408 | 0.00010  |
|                      | H | -3.22415 | -2.65988 | 0.24239  |                                  | H | -3.34688 | -0.18881 | 2.15025  |
|                      | H | -0.72966 | -2.67986 | 0.05542  |                                  | H | -0.86207 | -0.50631 | 2.15151  |
|                      | H | -3.19633 | 1.61800  | -0.20260 |                                  | H | -0.84961 | -0.47231 | -2.14142 |
|                      | O | 0.77862  | -0.68276 | -0.33754 |                                  | H | -3.33392 | -0.15446 | -2.14973 |
|                      | N | -4.79524 | -0.49286 | 0.15157  |                                  | O | 0.62655  | -0.74187 | 0.00883  |
|                      | O | -5.35707 | 0.59603  | 0.08937  |                                  | N | -4.90534 | 0.02766  | -0.00285 |
|                      | O | -5.37590 | -1.56181 | 0.30925  |                                  | O | -5.47850 | 0.10878  | -1.08710 |
|                      | C | 3.02535  | -0.23719 | 0.25719  |                                  | O | -5.48512 | 0.09099  | 1.07904  |
|                      | C | 3.96267  | 0.36795  | 1.10190  |                                  | C | 2.89184  | -0.06374 | -0.00158 |

|                                    |   |          |          |          |                                    |   |          |          |          |
|------------------------------------|---|----------|----------|----------|------------------------------------|---|----------|----------|----------|
|                                    | C | 3.45012  | -1.01416 | -0.82642 |                                    | C | 3.85549  | 0.95013  | -0.00903 |
|                                    | C | 5.32085  | 0.19579  | 0.86350  |                                    | C | 3.28469  | -1.40647 | 0.00598  |
|                                    | H | 3.61703  | 0.96886  | 1.93773  |                                    | C | 5.20667  | 0.62274  | -0.00871 |
|                                    | C | 4.81097  | -1.18207 | -1.06034 |                                    | H | 3.53542  | 1.98775  | -0.01493 |
|                                    | H | 2.72193  | -1.48247 | -1.48013 |                                    | C | 4.63833  | -1.72906 | 0.00606  |
|                                    | C | 5.74488  | -0.57897 | -0.21738 |                                    | H | 2.53604  | -2.19168 | 0.01168  |
|                                    | H | 6.05026  | 0.66482  | 1.51802  |                                    | C | 5.59838  | -0.71685 | -0.00123 |
|                                    | H | 5.14470  | -1.78411 | -1.90093 |                                    | H | 5.95564  | 1.40995  | -0.01436 |
|                                    | C | 1.59485  | -0.02066 | 0.55163  |                                    | H | 4.94573  | -2.77124 | 0.01180  |
|                                    | O | 1.14134  | 0.63944  | 1.45800  |                                    | H | 6.65498  | -0.97257 | -0.00107 |
|                                    | N | -0.61255 | 1.92016  | -0.53575 |                                    | C | 1.46398  | 0.33548  | -0.00237 |
|                                    | O | -1.14841 | 2.93468  | -0.10505 |                                    | O | 1.05242  | 1.47566  | -0.01134 |
|                                    | O | 0.42741  | 1.90720  | -1.18559 |                                    |   |          |          |          |
|                                    | H | 6.80748  | -0.71297 | -0.40353 |                                    |   |          |          |          |
| <b>TS1<sub>dcb</sub></b><br>(MeCN) | C | -3.03602 | -2.80038 | 0.65649  | <b>TS1<sub>dcc</sub></b><br>(MeCN) | C | 3.53167  | -1.11522 | -0.04978 |
|                                    | C | -2.44314 | -1.39867 | 0.73567  |                                    | C | 2.17883  | -1.30874 | 0.19195  |
|                                    | C | -2.88078 | -1.06478 | -1.68266 |                                    | C | 1.19570  | -0.29126 | -0.06015 |
|                                    | C | -3.48766 | -2.45722 | -1.78137 |                                    | C | 1.71179  | 0.94771  | -0.56126 |
|                                    | C | -4.08314 | -2.90925 | -0.44958 |                                    | C | 3.04873  | 1.14754  | -0.78090 |
|                                    | H | -3.21163 | -0.66105 | 0.97350  |                                    | C | 3.96394  | 0.10932  | -0.52475 |
|                                    | H | -1.64454 | -1.34252 | 1.47109  |                                    | H | 4.23716  | -1.91329 | 0.14601  |
|                                    | H | -2.23169 | -3.52688 | 0.48925  |                                    | H | 1.00774  | 1.74517  | -0.76462 |
|                                    | H | -3.47036 | -3.03142 | 1.63331  |                                    | H | 3.41086  | 2.10098  | -1.15045 |
|                                    | H | -3.63943 | -0.31588 | -1.43924 |                                    | O | -0.05567 | -0.48723 | 0.13382  |
|                                    | H | -2.37936 | -0.77331 | -2.60447 |                                    | N | 5.37125  | 0.31907  | -0.75400 |
|                                    | H | -4.24884 | -2.43398 | -2.56647 |                                    | O | 5.73681  | 1.41723  | -1.18303 |
|                                    | H | -2.71652 | -3.16473 | -2.10899 |                                    | O | 6.15639  | -0.60303 | -0.51531 |
|                                    | H | -4.94753 | -2.28217 | -0.20097 |                                    | C | -1.44422 | 0.54565  | -0.82887 |
|                                    | H | -4.44610 | -3.93757 | -0.52842 |                                    | C | -1.70991 | 1.68550  | 0.11020  |
|                                    | N | -1.85136 | -1.00217 | -0.58601 |                                    | C | -2.28581 | 2.82074  | -0.47176 |
|                                    | H | -1.09805 | -1.67140 | -0.80808 |                                    | C | -1.41516 | 1.68282  | 1.47661  |
|                                    | C | 3.80843  | -0.35344 | 1.03250  |                                    | C | -2.58300 | 3.93456  | 0.30910  |
|                                    | C | 2.48493  | -0.76912 | 1.04644  |                                    | H | -2.49567 | 2.82891  | -1.53756 |
|                                    | C | 1.41026  | 0.05536  | 0.57090  |                                    | C | -1.70528 | 2.80204  | 2.25063  |
|                                    | C | 1.79477  | 1.34982  | 0.09700  |                                    | H | -0.93172 | 0.82398  | 1.92716  |
|                                    | C | 3.09856  | 1.77165  | 0.10266  |                                    | C | -2.29403 | 3.92643  | 1.67206  |
|                                    | C | 4.11078  | 0.91492  | 0.57152  |                                    | H | -3.03401 | 4.81005  | -0.15020 |
|                                    | H | 4.58861  | -1.01304 | 1.39224  |                                    | H | -1.46319 | 2.79819  | 3.30997  |
|                                    | H | 1.01873  | 2.00869  | -0.27141 |                                    | O | -1.09266 | 0.69209  | -1.98027 |
|                                    | H | 3.35844  | 2.76359  | -0.25122 |                                    | N | 1.79548  | -2.60912 | 0.70487  |

|                                            |   |          |          |          |                                            |   |          |          |          |
|--------------------------------------------|---|----------|----------|----------|--------------------------------------------|---|----------|----------|----------|
|                                            | O | 0.19351  | -0.35537 | 0.55931  |                                            | O | 0.74743  | -2.72320 | 1.33868  |
|                                            | N | 5.48253  | 1.35894  | 0.57889  |                                            | O | 2.55622  | -3.56131 | 0.49375  |
|                                            | O | 5.73277  | 2.49213  | 0.15896  |                                            | H | -2.51920 | 4.79749  | 2.28203  |
|                                            | O | 6.35248  | 0.59252  | 1.00191  |                                            | C | -3.61274 | -2.37012 | 0.70144  |
|                                            | C | -1.10005 | 0.37516  | -0.67676 |                                            | C | -2.75121 | -1.11792 | 0.75623  |
|                                            | C | -1.72425 | 1.49450  | 0.11186  |                                            | C | -3.57584 | -0.58230 | -1.49443 |
|                                            | C | -2.36583 | 2.48075  | -0.64574 |                                            | C | -4.40522 | -1.85441 | -1.43168 |
|                                            | C | -1.68994 | 1.60897  | 1.50430  |                                            | H | -3.31228 | -0.28767 | 1.18548  |
|                                            | C | -2.98347 | 3.55903  | -0.01716 |                                            | H | -1.84024 | -1.29425 | 1.32457  |
|                                            | H | -2.37381 | 2.40265  | -1.72916 |                                            | H | -3.02931 | -3.22158 | 0.32189  |
|                                            | C | -2.29995 | 2.69331  | 2.12805  |                                            | H | -3.95448 | -2.61025 | 1.70958  |
|                                            | H | -1.16413 | 0.87001  | 2.09747  |                                            | H | -4.14101 | 0.27030  | -1.11143 |
|                                            | C | -2.95231 | 3.66672  | 1.37169  |                                            | H | -3.24500 | -0.37616 | -2.51226 |
|                                            | H | -3.48239 | 4.31768  | -0.61426 |                                            | H | -5.32897 | -1.70647 | -1.99362 |
|                                            | H | -2.25938 | 2.78119  | 3.21047  |                                            | H | -3.85355 | -2.69070 | -1.88530 |
|                                            | O | -0.56161 | 0.54782  | -1.75455 |                                            | N | -2.35385 | -0.72362 | -0.63304 |
|                                            | N | 2.23387  | -2.10245 | 1.55929  |                                            | H | -1.75579 | -1.47216 | -1.01969 |
|                                            | O | 1.13311  | -2.36555 | 2.03976  |                                            | O | -4.76735 | -2.17386 | -0.09903 |
|                                            | O | 3.15591  | -2.92465 | 1.50528  |                                            |   |          |          |          |
|                                            | H | -3.42791 | 4.51107  | 1.86407  |                                            |   |          |          |          |
| <b>TS1<sub>fad</sub> ··3H<sub>2</sub>O</b> | C | 3.13359  | -2.12463 | -0.47964 | <b>TS1<sub>fae</sub> ··3H<sub>2</sub>O</b> | C | -3.92910 | -0.97529 | -0.17001 |
|                                            | C | 2.02356  | -1.29607 | -0.49901 |                                            | C | -2.62915 | -1.44802 | -0.20160 |
|                                            | C | 2.18879  | 0.08810  | -0.34253 |                                            | C | -1.56593 | -0.58028 | -0.49229 |
|                                            | C | 3.47350  | 0.62521  | -0.16447 |                                            | C | -1.81468 | 0.77537  | -0.75092 |
|                                            | C | 4.58202  | -0.20223 | -0.14268 |                                            | C | -3.11716 | 1.24813  | -0.72134 |
|                                            | C | 4.40297  | -1.57559 | -0.30393 |                                            | C | -4.16324 | 0.37348  | -0.43374 |
|                                            | H | 3.01976  | -3.19677 | -0.59504 |                                            | H | -4.75621 | -1.63953 | 0.05392  |
|                                            | H | 1.03348  | -1.70752 | -0.62195 |                                            | H | -2.41973 | -2.49359 | -0.00121 |
|                                            | H | 3.58779  | 1.69732  | -0.04259 |                                            | H | -0.99577 | 1.44477  | -0.96675 |
|                                            | H | 5.57693  | 0.20611  | -0.00529 |                                            | H | -3.32497 | 2.29428  | -0.91663 |
|                                            | O | 1.16804  | 0.98336  | -0.30981 |                                            | O | -0.32693 | -1.14195 | -0.45671 |
|                                            | N | 5.55927  | -2.44946 | -0.28485 |                                            | N | -5.52357 | 0.87666  | -0.40554 |
|                                            | O | 6.67392  | -1.94833 | -0.12003 |                                            | O | -5.71611 | 2.06930  | -0.65092 |
|                                            | O | 5.38567  | -3.66118 | -0.43389 |                                            | O | -6.43561 | 0.09188  | -0.13705 |
|                                            | C | -0.13259 | 0.66389  | -0.88705 |                                            | C | 0.79845  | -0.51016 | -1.10136 |
|                                            | C | -1.00795 | 1.88368  | -0.70423 |                                            | C | 2.01617  | -1.36275 | -0.85524 |
|                                            | C | -1.81658 | 2.27186  | -1.77104 |                                            | C | 2.94434  | -1.48974 | -1.88771 |
|                                            | C | -1.02996 | 2.62755  | 0.47891  |                                            | C | 2.23883  | -2.02648 | 0.35452  |
|                                            | C | -2.63713 | 3.39491  | -1.66475 |                                            | C | 4.08615  | -2.27228 | -1.71835 |
|                                            | H | -1.79424 | 1.68543  | -2.68451 |                                            | H | 2.76164  | -0.97046 | -2.82360 |

|                                                   |    |          |          |          |                                                   |   |          |          |          |
|---------------------------------------------------|----|----------|----------|----------|---------------------------------------------------|---|----------|----------|----------|
|                                                   | C  | -1.84500 | 3.75084  | 0.58502  |                                                   | C | 3.37702  | -2.80949 | 0.52379  |
|                                                   | H  | -0.42283 | 2.31865  | 1.32304  |                                                   | H | 1.53015  | -1.92417 | 1.16926  |
|                                                   | C  | -2.65129 | 4.13903  | -0.48700 |                                                   | C | 4.30481  | -2.93493 | -0.51218 |
|                                                   | H  | -3.26347 | 3.68903  | -2.50329 |                                                   | H | 4.80384  | -2.36550 | -2.52957 |
|                                                   | H  | -1.85650 | 4.32355  | 1.50913  |                                                   | H | 3.54375  | -3.32131 | 1.46833  |
|                                                   | H  | -3.28848 | 5.01579  | -0.40143 |                                                   | H | 5.19376  | -3.54618 | -0.37743 |
|                                                   | C  | -2.15043 | -1.90647 | -0.46534 |                                                   | C | 2.94514  | 3.73375  | 0.26183  |
|                                                   | C  | -1.86958 | -0.88869 | 0.46481  |                                                   | O | 3.19123  | 4.70936  | 0.97364  |
|                                                   | C  | -2.89623 | -0.48966 | 1.34028  |                                                   | C | 3.58126  | 3.60753  | -1.10393 |
|                                                   | C  | -4.15173 | -1.08879 | 1.29982  |                                                   | H | 4.18815  | 4.49383  | -1.29220 |
|                                                   | C  | -4.40000 | -2.09002 | 0.36633  |                                                   | H | 4.20681  | 2.71327  | -1.15343 |
|                                                   | C  | -3.40817 | -2.50090 | -0.51846 |                                                   | H | 2.81976  | 3.50204  | -1.87919 |
|                                                   | H  | -1.36975 | -2.22510 | -1.14746 |                                                   | C | 2.02661  | 2.67331  | 0.73457  |
|                                                   | H  | -2.69604 | 0.30157  | 2.05774  |                                                   | N | 1.84160  | 1.69110  | -0.09088 |
|                                                   | H  | -4.93243 | -0.77501 | 1.98740  |                                                   | O | 1.02838  | 0.72900  | 0.31271  |
|                                                   | H  | -3.61197 | -3.28743 | -1.24006 |                                                   | O | -0.15000 | -0.18159 | 2.69186  |
|                                                   | Cl | -5.98651 | -2.85006 | 0.30828  |                                                   | H | -1.02505 | 0.24428  | 2.73636  |
|                                                   | O  | -0.65605 | -0.32324 | 0.54118  |                                                   | H | 0.28633  | 0.19644  | 1.89304  |
|                                                   | H  | 1.72472  | 4.45198  | 0.26067  |                                                   | O | -0.56269 | -3.97515 | 0.35641  |
|                                                   | O  | 2.17501  | 3.61114  | 0.46712  |                                                   | H | 0.02466  | -4.71891 | 0.12222  |
|                                                   | H  | 1.65362  | 2.91684  | 0.02193  |                                                   | H | -0.23096 | -3.20918 | -0.14757 |
|                                                   | O  | 1.87438  | 2.71864  | 3.18474  |                                                   | C | 1.37292  | 2.78686  | 2.07885  |
|                                                   | H  | 1.39051  | 1.87080  | 3.08110  |                                                   | H | 1.66715  | 1.96122  | 2.73329  |
|                                                   | H  | 2.00389  | 3.06450  | 2.27946  |                                                   | H | 1.64904  | 3.72951  | 2.55081  |
|                                                   | O  | 0.45992  | 0.29162  | 2.94102  |                                                   | H | 0.28392  | 2.73924  | 1.98065  |
|                                                   | H  | 0.03917  | 0.07202  | 2.06830  |                                                   | O | -0.25159 | -2.97737 | 3.03485  |
|                                                   | H  | -0.24460 | 0.19735  | 3.60687  |                                                   | H | -0.37854 | -3.36615 | 2.14672  |
|                                                   | O  | -0.16777 | -0.00923 | -1.91827 |                                                   | H | -0.23023 | -2.00602 | 2.89924  |
|                                                   |    |          |          |          |                                                   | O | 0.62636  | 0.10934  | -2.14640 |
| <b>TS1<sub>fad</sub></b> ··2H <sub>2</sub> O1DMSO | C  | -1.50375 | -2.87268 | 1.00284  | <b>TS1<sub>fac</sub></b> ··2H <sub>2</sub> O1DMSO | C | 2.59381  | -2.77533 | -0.83070 |
|                                                   | C  | -0.68021 | -1.75850 | 0.98853  |                                                   | C | 2.00957  | -1.53483 | -1.01149 |
|                                                   | C  | -1.22143 | -0.49350 | 1.26256  |                                                   | C | 0.61948  | -1.37954 | -0.88187 |
|                                                   | C  | -2.58932 | -0.36236 | 1.54889  |                                                   | C | -0.18573 | -2.48694 | -0.57085 |
|                                                   | C  | -3.41204 | -1.47480 | 1.56289  |                                                   | C | 0.40030  | -3.72938 | -0.39235 |
|                                                   | C  | -2.86010 | -2.72611 | 1.29005  |                                                   | C | 1.78182  | -3.86807 | -0.52337 |
|                                                   | H  | -1.10030 | -3.85604 | 0.78836  |                                                   | H | 3.66588  | -2.90432 | -0.92889 |
|                                                   | H  | 0.37035  | -1.85989 | 0.76182  |                                                   | H | 2.61342  | -0.66395 | -1.25338 |
|                                                   | H  | -2.99006 | 0.62637  | 1.74985  |                                                   | H | -1.25389 | -2.36676 | -0.46840 |
|                                                   | H  | -4.46937 | -1.38145 | 1.78479  |                                                   | H | -0.20804 | -4.59289 | -0.14738 |
|                                                   | O  | -0.51457 | 0.66452  | 1.23807  |                                                   | O | 0.16399  | -0.11566 | -1.03834 |



|    |          |          |          |   |          |          |          |
|----|----------|----------|----------|---|----------|----------|----------|
| N  | -3.71446 | -3.89716 | 1.30487  | N | 2.38539  | -5.17061 | -0.33563 |
| O  | -4.91391 | -3.74804 | 1.54944  | O | 1.65448  | -6.12926 | -0.07288 |
| O  | -3.21075 | -4.99833 | 1.07211  | O | 3.60991  | -5.27528 | -0.44497 |
| C  | 0.91273  | 0.66188  | 1.47590  | C | -1.21447 | 0.14283  | -1.37407 |
| C  | 1.36127  | 2.10573  | 1.46552  | C | -1.37518 | 1.63786  | -1.52718 |
| C  | 2.25056  | 2.52206  | 2.45436  | C | -2.43629 | 2.10127  | -2.30515 |
| C  | 0.90479  | 3.02787  | 0.52067  | C | -0.51327 | 2.55986  | -0.92659 |
| C  | 2.68699  | 3.84627  | 2.50039  | C | -2.64386 | 3.46872  | -2.47927 |
| H  | 2.59758  | 1.79874  | 3.18638  | H | -3.09403 | 1.37644  | -2.77478 |
| C  | 1.33799  | 4.34961  | 0.56556  | C | -0.71774 | 3.92660  | -1.10465 |
| H  | 0.22472  | 2.70667  | -0.26109 | H | 0.32238  | 2.21831  | -0.32590 |
| C  | 2.23141  | 4.76363  | 1.55602  | C | -1.78390 | 4.38697  | -1.87857 |
| H  | 3.38131  | 4.16070  | 3.27564  | H | -3.47492 | 3.81745  | -3.08749 |
| H  | 0.98129  | 5.06017  | -0.17596 | H | -0.04112 | 4.63794  | -0.63659 |
| H  | 2.56959  | 5.79637  | 1.58893  | H | -1.94059 | 5.45429  | -2.01445 |
| O  | 1.38333  | -0.16233 | 2.26060  | O | -1.81243 | -0.65013 | -2.10757 |
| C  | 3.65671  | -0.23853 | 0.16517  | C | -5.05828 | -0.80660 | 1.53716  |
| C  | 2.44347  | -0.47571 | -0.51417 | O | -5.64690 | -1.01801 | 2.59915  |
| C  | 2.44416  | -1.45939 | -1.52594 | C | -5.81222 | -0.84705 | 0.22736  |
| C  | 3.59928  | -2.15887 | -1.85961 | H | -5.75404 | 0.11888  | -0.27936 |
| C  | 4.77972  | -1.89899 | -1.17088 | H | -5.37364 | -1.58374 | -0.44893 |
| C  | 4.81130  | -0.94432 | -0.15968 | H | -6.85415 | -1.09797 | 0.42900  |
| H  | 3.69044  | 0.50750  | 0.95037  | C | -3.60749 | -0.51217 | 1.53024  |
| H  | 1.51678  | -1.66076 | -2.05618 | N | -3.08938 | -0.30142 | 0.36105  |
| H  | 3.57753  | -2.90609 | -2.64841 | O | -1.79257 | -0.03686 | 0.34587  |
| H  | 5.73763  | -0.74480 | 0.37260  | O | 0.23567  | 0.74974  | 2.31826  |
| Cl | 6.24535  | -2.78562 | -1.58261 | H | 0.96504  | 1.16601  | 1.81535  |
| O  | 1.32070  | 0.19266  | -0.25895 | H | -0.43825 | 0.48607  | 1.66197  |
| H  | -2.70124 | 2.81144  | 0.26850  | O | 3.54664  | 1.51400  | -1.47002 |
| O  | -2.58456 | 3.01128  | 1.22316  | H | 3.00949  | 1.87411  | -2.19818 |
| H  | -1.74816 | 2.57603  | 1.45697  | H | 3.01154  | 1.64512  | -0.65443 |
| O  | -0.44900 | 0.84043  | -2.31447 | C | -2.83586 | -0.48515 | 2.81484  |
| H  | 0.16089  | 0.56591  | -1.59084 | H | -2.42119 | 0.50934  | 3.00460  |
| H  | -1.10803 | 1.43312  | -1.89910 | H | -3.48101 | -0.76639 | 3.64690  |
| S  | -3.84731 | 1.84770  | -2.34603 | H | -1.98491 | -1.17106 | 2.76528  |
| O  | -2.67820 | 2.36405  | -1.48190 | S | 3.37933  | 2.85143  | 1.82975  |
| C  | -3.26658 | 2.01271  | -4.04687 | O | 2.40578  | 1.99272  | 0.99485  |
| H  | -3.99593 | 1.55722  | -4.72033 | C | 4.98416  | 2.04229  | 1.66089  |
| H  | -3.18681 | 3.07981  | -4.25827 | H | 5.74995  | 2.66511  | 2.12857  |
| H  | -2.29090 | 1.53081  | -4.13540 | H | 4.91863  | 1.08689  | 2.18317  |

|                                              |                                                                                                                                                                                                                                                                                                                                                                                                                                                                                                                                                                                                                                                                                                                                 |                                              |                                                                                                                                                                                                                                                                                                                                                                                                                                                                                                                                                                                                                                                                                                     |
|----------------------------------------------|---------------------------------------------------------------------------------------------------------------------------------------------------------------------------------------------------------------------------------------------------------------------------------------------------------------------------------------------------------------------------------------------------------------------------------------------------------------------------------------------------------------------------------------------------------------------------------------------------------------------------------------------------------------------------------------------------------------------------------|----------------------------------------------|-----------------------------------------------------------------------------------------------------------------------------------------------------------------------------------------------------------------------------------------------------------------------------------------------------------------------------------------------------------------------------------------------------------------------------------------------------------------------------------------------------------------------------------------------------------------------------------------------------------------------------------------------------------------------------------------------------|
|                                              | C -3.77776 0.04731 -2.22608<br>H -4.04714 -0.21782 -1.20317<br>H -4.50189 -0.38320 -2.92168<br>H -2.76067 -0.28220 -2.44829                                                                                                                                                                                                                                                                                                                                                                                                                                                                                                                                                                                                     |                                              | H 5.19490 1.88463 0.60136<br>C 3.71353 4.30449 0.81326<br>H 2.78451 4.87247 0.74874<br>H 4.48250 4.91054 1.29747<br>H 4.03336 3.97996 -0.17869                                                                                                                                                                                                                                                                                                                                                                                                                                                                                                                                                      |
| <b>1fb</b><br>(H <sub>2</sub> O)             | C 1.12850 1.16444 -0.16506<br>C -0.24474 1.19087 -0.36434<br>C -0.93140 -0.01420 -0.46624<br>C -0.27873 -1.23584 -0.37829<br>C 1.09810 -1.25074 -0.17793<br>C 1.81364 -0.05326 -0.06845<br>H 1.68854 2.09062 -0.08292<br>H -0.78563 2.12985 -0.44482<br>H -0.84352 -2.15951 -0.46888<br>H 1.60224 -2.20963 -0.11025<br>O -2.30167 0.00641 -0.73355<br>C -3.15824 0.01114 0.32538<br>C -4.58284 0.03648 -0.14303<br>H -4.75407 0.92571 -0.75412<br>H -4.78082 -0.83696 -0.76862<br>H -5.25144 0.03962 0.71584<br>O -2.78231 -0.00352 1.47547<br>C 3.29364 -0.02854 0.14591<br>O 3.88935 1.03877 0.23505<br>C 4.04203 -1.33485 0.25118<br>H 3.66377 -1.93365 1.08477<br>H 3.91876 -1.92820 -0.65944<br>H 5.10066 -1.12821 0.40660 | <b>1fc</b><br>(H <sub>2</sub> O)             | C 1.11922 1.21602 -0.21624<br>C -0.25748 1.18779 -0.38519<br>C -0.95235 -0.02688 -0.44425<br>C -0.24931 -1.22040 -0.32798<br>C 1.12422 -1.21278 -0.13948<br>C 1.78476 0.00968 -0.08384<br>H 1.65202 2.15925 -0.18285<br>H -0.79763 -2.15572 -0.39387<br>H 1.67860 -2.13992 -0.04044<br>O -2.29790 -0.07971 -0.71480<br>N 3.23846 0.02967 0.11288<br>O 3.81561 -1.04759 0.21498<br>O 3.79659 1.12073 0.16435<br>C -3.16563 -0.05256 0.35493<br>C -4.58096 0.00535 -0.12265<br>H -4.75087 0.97493 -0.59793<br>H -4.76024 -0.76942 -0.87062<br>H -5.25733 -0.11565 0.72149<br>O -2.77492 -0.07428 1.49466<br>N -0.94092 2.47765 -0.51574<br>O -2.12752 2.54328 -0.21297<br>O -0.27590 3.42933 -0.91093 |
| <b>TS1<sub>fbd</sub></b> → 3H <sub>2</sub> O | C -2.34566 -1.46130 -0.31572<br>C -2.21535 -0.14051 0.14317<br>C -3.36980 0.53894 0.56444<br>C -4.61638 -0.08066 0.54167<br>C -4.71725 -1.38856 0.07960<br>C -3.59109 -2.08232 -0.35185<br>H -1.46128 -1.99347 -0.64691<br>H -3.28058 1.56443 0.91354<br>H -5.50141 0.45275 0.87726<br>H -3.68279 -3.10512 -0.70698<br>Cl -6.28879 -2.17784 0.04545<br>O -1.01180 0.46632 0.21453                                                                                                                                                                                                                                                                                                                                               | <b>TS1<sub>fbe</sub></b> → 3H <sub>2</sub> O | C 2.57166 -1.55255 0.06826<br>C 1.40248 -0.85391 -0.18766<br>C 1.46899 0.51940 -0.45201<br>C 2.70355 1.17287 -0.45089<br>C 3.86701 0.46214 -0.18392<br>C 3.81971 -0.91280 0.07503<br>H 2.53143 -2.61752 0.27647<br>H 0.43969 -1.34713 -0.17711<br>H 2.74227 2.23857 -0.65746<br>H 4.81245 0.99604 -0.18699<br>O 0.35977 1.29596 -0.65979<br>C -0.75480 0.77571 -1.43707                                                                                                                                                                                                                                                                                                                             |

|                                           |   |          |          |          |                                           |   |          |          |          |
|-------------------------------------------|---|----------|----------|----------|-------------------------------------------|---|----------|----------|----------|
|                                           | H | 1.67850  | 4.45720  | -1.37719 |                                           | O | -0.53100 | -0.08702 | -2.28433 |
|                                           | O | 1.72911  | 4.04688  | -0.49425 |                                           | C | -1.72489 | 1.91344  | -1.65257 |
|                                           | H | 1.48504  | 3.10700  | -0.62433 |                                           | H | -1.35586 | 2.53816  | -2.47224 |
|                                           | O | -0.22584 | 4.78987  | 1.44168  |                                           | H | -2.68651 | 1.48946  | -1.94239 |
|                                           | H | -0.40091 | 3.89372  | 1.80188  |                                           | H | -1.85021 | 2.52597  | -0.75935 |
|                                           | H | 0.46176  | 4.64709  | 0.76000  |                                           | C | -4.41249 | -2.17802 | -0.01178 |
|                                           | O | -0.58043 | 2.14611  | 2.33020  |                                           | O | -5.03564 | -2.92725 | 0.74150  |
|                                           | H | -0.73287 | 1.54748  | 1.55497  |                                           | C | -4.85746 | -1.98875 | -1.44373 |
|                                           | H | -1.28750 | 1.94230  | 2.96810  |                                           | H | -5.17526 | -0.95595 | -1.60698 |
|                                           | C | 2.82161  | -1.74919 | 0.34438  |                                           | H | -4.03709 | -2.17893 | -2.13788 |
|                                           | C | 1.75715  | -0.91215 | 0.05059  |                                           | H | -5.68927 | -2.66440 | -1.64614 |
|                                           | C | 2.00802  | 0.38065  | -0.43052 |                                           | C | -3.22323 | -1.44216 | 0.47841  |
|                                           | C | 3.32867  | 0.81072  | -0.60228 |                                           | N | -2.63676 | -0.69612 | -0.40244 |
|                                           | C | 4.38611  | -0.03527 | -0.29672 |                                           | O | -1.57723 | -0.01499 | 0.02573  |
|                                           | C | 4.15042  | -1.33218 | 0.17736  |                                           | O | -1.73646 | 1.66853  | 2.22158  |
|                                           | H | 2.63437  | -2.75108 | 0.71924  |                                           | H | -1.03399 | 1.39091  | 2.83684  |
|                                           | H | 0.73527  | -1.23483 | 0.19412  |                                           | H | -1.67585 | 1.04979  | 1.45347  |
|                                           | H | 3.51403  | 1.81372  | -0.97599 |                                           | O | 0.63055  | 4.11785  | -0.17436 |
|                                           | H | 5.39895  | 0.32909  | -0.43988 |                                           | H | 0.53960  | 3.16923  | -0.39572 |
|                                           | O | 1.02723  | 1.28686  | -0.69983 |                                           | H | 0.61483  | 4.59025  | -1.02734 |
|                                           | C | -0.26565 | 0.83757  | -1.28138 |                                           | C | -2.76997 | -1.60275 | 1.89903  |
|                                           | O | -0.23243 | -0.14165 | -2.04228 |                                           | H | -2.97664 | -0.70109 | 2.48396  |
|                                           | C | -0.99028 | 2.11555  | -1.66463 |                                           | H | -3.28263 | -2.44529 | 2.36301  |
|                                           | H | -0.52797 | 2.52506  | -2.56780 |                                           | H | -1.68865 | -1.76341 | 1.93186  |
|                                           | H | -2.02922 | 1.87095  | -1.89185 |                                           | O | -1.61952 | 4.39943  | 1.55296  |
|                                           | H | -0.96207 | 2.86231  | -0.86997 |                                           | H | -0.84611 | 4.42104  | 0.95406  |
|                                           | C | 5.25280  | -2.27064 | 0.50905  |                                           | H | -1.69875 | 3.45700  | 1.81442  |
|                                           | O | 5.01646  | -3.40488 | 0.92034  |                                           | C | 5.04164  | -1.71138 | 0.35981  |
|                                           | C | 6.68357  | -1.81450 | 0.33414  |                                           | O | 4.97021  | -2.92010 | 0.56819  |
|                                           | H | 6.87940  | -1.53478 | -0.70495 |                                           | C | 6.38333  | -1.01625 | 0.39152  |
|                                           | H | 6.89193  | -0.93696 | 0.95277  |                                           | H | 6.60115  | -0.54610 | -0.57177 |
|                                           | H | 7.35383  | -2.62469 | 0.62106  |                                           | H | 6.39671  | -0.22792 | 1.14950  |
|                                           |   |          |          |          |                                           | H | 7.15883  | -1.74777 | 0.61813  |
| <b>TS1<sub>fcd</sub> -3H<sub>2</sub>O</b> | C | -2.38326 | -1.25137 | -0.38069 | <b>TS1<sub>fce</sub> -3H<sub>2</sub>O</b> | C | 0.90914  | 0.57495  | 1.80455  |
|                                           | C | -2.13527 | 0.01850  | 0.17398  |                                           | O | 0.94086  | -0.35475 | 2.58172  |
|                                           | C | -3.23702 | 0.76831  | 0.62868  |                                           | C | 1.70968  | 1.83807  | 1.91591  |
|                                           | C | -4.53323 | 0.26888  | 0.54483  |                                           | H | 1.30009  | 2.42974  | 2.74171  |
|                                           | C | -4.74572 | -0.98880 | -0.01132 |                                           | H | 2.73947  | 1.57261  | 2.15298  |
|                                           | C | -3.67908 | -1.75096 | -0.47712 |                                           | H | 1.67489  | 2.42568  | 1.00042  |
|                                           | H | -1.54493 | -1.84131 | -0.73616 |                                           | C | 4.82835  | -2.01708 | -0.39700 |

|                      |    |          |          |          |                        |   |          |          |          |
|----------------------|----|----------|----------|----------|------------------------|---|----------|----------|----------|
|                      | H  | -3.05997 | 1.75355  | 1.05237  |                        | O | 5.57481  | -2.43876 | -1.28762 |
|                      | H  | -5.37262 | 0.85678  | 0.90624  |                        | C | 5.11350  | -2.36074 | 1.04972  |
|                      | H  | -3.85662 | -2.73353 | -0.90602 |                        | H | 5.30295  | -1.45449 | 1.62959  |
|                      | Cl | -6.38334 | -1.62495 | -0.12197 |                        | H | 4.25632  | -2.85570 | 1.51023  |
|                      | O  | -0.89146 | 0.50462  | 0.28576  |                        | H | 5.98716  | -3.01264 | 1.08941  |
|                      | H  | 0.82049  | 5.11291  | -0.61567 |                        | C | 3.66396  | -1.17925 | -0.72122 |
|                      | O  | 0.93786  | 4.63009  | 0.22315  |                        | N | 2.93710  | -0.80320 | 0.29412  |
|                      | H  | 1.43983  | 3.82806  | -0.00989 |                        | O | 1.89025  | -0.05810 | 0.02355  |
|                      | O  | -1.12243 | 4.30523  | 2.16142  |                        | O | 0.94381  | 1.81027  | -1.74239 |
|                      | H  | -0.92094 | 3.38413  | 2.43555  |                        | H | 0.03874  | 1.83355  | -1.38676 |
|                      | H  | -0.46421 | 4.49017  | 1.46220  |                        | H | 1.39943  | 1.10499  | -1.21828 |
|                      | O  | -0.36398 | 1.65777  | 2.66767  |                        | O | -0.94603 | 5.25803  | -0.21576 |
|                      | H  | -0.54049 | 1.24022  | 1.78163  |                        | H | -1.48443 | 4.44537  | -0.23864 |
|                      | H  | -0.84705 | 1.11588  | 3.31664  |                        | H | -0.99673 | 5.57616  | 0.70477  |
|                      | C  | -0.05452 | 0.92178  | -1.31376 |                        | C | 3.35980  | -0.80912 | -2.14257 |
|                      | O  | 0.01204  | -0.07486 | -2.02219 |                        | H | 3.44214  | 0.27239  | -2.29480 |
|                      | C  | -0.82840 | 2.16528  | -1.66988 |                        | H | 4.05140  | -1.31153 | -2.81889 |
|                      | H  | -0.36823 | 2.61512  | -2.55511 |                        | H | 2.33261  | -1.08457 | -2.40112 |
|                      | H  | -1.85152 | 1.88059  | -1.91715 |                        | O | 1.66494  | 4.47541  | -1.11644 |
|                      | H  | -0.83070 | 2.88633  | -0.85409 |                        | H | 0.80148  | 4.79708  | -0.78674 |
|                      | C  | 4.51567  | -0.03527 | -0.11078 |                        | H | 1.50565  | 3.53879  | -1.36218 |
|                      | C  | 3.50019  | 0.84770  | -0.45534 |                        | C | -3.38687 | -0.57221 | -0.16090 |
|                      | C  | 2.13438  | 0.50723  | -0.33088 |                        | C | -2.38047 | 0.31306  | 0.18436  |
|                      | C  | 1.83149  | -0.77766 | 0.15945  |                        | C | -1.12680 | -0.11229 | 0.67085  |
|                      | C  | 2.82972  | -1.65671 | 0.52118  |                        | C | -0.88980 | -1.49374 | 0.73961  |
|                      | C  | 4.16775  | -1.27664 | 0.38436  |                        | C | -1.87405 | -2.39096 | 0.36708  |
|                      | H  | 5.55403  | 0.25172  | -0.22531 |                        | C | -3.11486 | -1.92612 | -0.06796 |
|                      | H  | 0.78868  | -1.04135 | 0.26636  |                        | H | -4.34754 | -0.21175 | -0.51183 |
|                      | H  | 2.58431  | -2.63654 | 0.91657  |                        | H | 0.06939  | -1.84712 | 1.08665  |
|                      | O  | 1.19483  | 1.39070  | -0.66798 |                        | H | -1.68520 | -3.45817 | 0.41339  |
|                      | N  | 5.22337  | -2.20232 | 0.76867  |                        | O | -0.25594 | 0.84252  | 1.02250  |
|                      | O  | 4.89538  | -3.31019 | 1.18978  |                        | N | -4.15063 | -2.87929 | -0.44486 |
|                      | O  | 6.39189  | -1.83567 | 0.65430  |                        | O | -3.89381 | -4.07754 | -0.35306 |
|                      | N  | 3.92613  | 2.13745  | -0.98582 |                        | O | -5.23023 | -2.43914 | -0.83495 |
|                      | O  | 3.22473  | 3.12861  | -0.79540 |                        | N | -2.66708 | 1.73420  | 0.01270  |
|                      | O  | 4.99433  | 2.17501  | -1.59356 |                        | O | -1.78680 | 2.44754  | -0.47485 |
|                      |    |          |          |          |                        | O | -3.77670 | 2.14111  | 0.32929  |
| <b>1ga</b><br>(MeCN) | C  | -3.58620 | -1.67843 | -0.31271 | <b>1gb</b><br>( MeCN ) | C | -3.38985 | -1.76252 | 0.13064  |
|                      | C  | -2.20228 | -1.62199 | -0.38181 |                        | C | -2.00781 | -1.75284 | 0.02556  |
|                      | C  | -1.54283 | -0.40318 | -0.28453 |                        | C | -1.31838 | -0.56271 | -0.18611 |

|                                           |   |          |          |          |                                           |   |          |          |          |
|-------------------------------------------|---|----------|----------|----------|-------------------------------------------|---|----------|----------|----------|
|                                           | C | -2.28565 | 0.77346  | -0.13142 |                                           | C | -2.04197 | 0.63384  | -0.28896 |
|                                           | C | -3.67138 | 0.73919  | -0.08036 |                                           | C | -3.42203 | 0.64799  | -0.15960 |
|                                           | C | -4.29658 | -0.49315 | -0.16064 |                                           | C | -4.07538 | -0.55635 | 0.04042  |
|                                           | H | -4.10967 | -2.62613 | -0.38015 |                                           | H | -3.92997 | -2.68944 | 0.29057  |
|                                           | H | -1.61350 | -2.52438 | -0.51896 |                                           | H | -1.43530 | -2.67173 | 0.11028  |
|                                           | H | -4.24231 | 1.65427  | 0.02649  |                                           | H | -3.97121 | 1.57997  | -0.22924 |
|                                           | O | -0.17662 | -0.38250 | -0.44693 |                                           | O | 0.04064  | -0.65644 | -0.31366 |
|                                           | N | -5.76195 | -0.54081 | -0.09017 |                                           | N | -5.53604 | -0.55039 | 0.15955  |
|                                           | O | -6.36511 | 0.51907  | 0.03950  |                                           | O | -6.11570 | 0.52811  | 0.07970  |
|                                           | O | -6.30099 | -1.63957 | -0.16533 |                                           | O | -6.09993 | -1.62602 | 0.33290  |
|                                           | C | 2.04467  | -0.37544 | 0.36659  |                                           | C | 2.27049  | -0.14208 | 0.26844  |
|                                           | C | 2.94548  | -0.51072 | 1.42580  |                                           | C | 3.20246  | 0.50672  | 1.08236  |
|                                           | C | 2.50227  | -0.14371 | -0.93287 |                                           | C | 2.72343  | -0.94738 | -0.78950 |
|                                           | C | 4.31033  | -0.41733 | 1.19301  |                                           | C | 4.56601  | 0.36647  | 0.85948  |
|                                           | H | 2.57101  | -0.68907 | 2.42887  |                                           | H | 2.85132  | 1.13007  | 1.89941  |
|                                           | C | 3.86617  | -0.04779 | -1.17806 |                                           | C | 4.07712  | -1.09345 | -1.02058 |
|                                           | H | 1.79891  | -0.03706 | -1.75138 |                                           | H | 2.01142  | -1.45744 | -1.42973 |
|                                           | C | 4.74242  | -0.18724 | -0.10843 |                                           | C | 5.00831  | -0.43796 | -0.19852 |
|                                           | H | 5.02764  | -0.51975 | 1.99939  |                                           | H | 5.26463  | 0.88292  | 1.50753  |
|                                           | H | 4.24567  | 0.13205  | -2.17750 |                                           | H | 4.44442  | -1.71173 | -1.83459 |
|                                           | C | 0.59512  | -0.48282 | 0.67872  |                                           | C | 0.84510  | 0.05326  | 0.55619  |
|                                           | O | 0.12373  | -0.65279 | 1.77587  |                                           | O | 0.37053  | 0.73180  | 1.44025  |
|                                           | N | -1.64425 | 2.08786  | -0.03393 |                                           | N | -1.39241 | 1.91661  | -0.56723 |
|                                           | O | -2.31084 | 3.06433  | -0.35837 |                                           | O | -1.93227 | 2.92914  | -0.13659 |
|                                           | O | -0.49024 | 2.14321  | 0.37686  |                                           | O | -0.36544 | 1.90908  | -1.23753 |
|                                           | N | 6.18712  | -0.08754 | -0.36392 |                                           | O | 6.30896  | -0.64404 | -0.50636 |
|                                           | O | 6.95090  | -0.21568 | 0.58813  |                                           | C | 7.30763  | -0.00510 | 0.28687  |
|                                           | O | 6.55612  | 0.11843  | -1.51619 |                                           | H | 8.26335  | -0.30876 | -0.13832 |
|                                           |   |          |          |          |                                           | H | 7.21466  | 1.08399  | 0.23419  |
|                                           |   |          |          |          |                                           | H | 7.25170  | -0.33319 | 1.32936  |
| <b>TS1<sub>gab</sub></b><br><b>(MeCN)</b> | C | -3.46382 | -2.39474 | 0.78164  | <b>TS1<sub>gac</sub></b><br><b>(MeCN)</b> | C | 3.25905  | -1.47137 | -0.50408 |
|                                           | C | -2.73260 | -1.05829 | 0.80887  |                                           | C | 1.94627  | -1.36785 | -0.06776 |
|                                           | C | -3.43558 | -0.61904 | -1.53406 |                                           | C | 1.29709  | -0.11408 | 0.14121  |
|                                           | C | -4.18409 | -1.94350 | -1.57323 |                                           | C | 2.04992  | 1.03829  | -0.21518 |
|                                           | C | -4.64736 | -2.37315 | -0.18286 |                                           | C | 3.33840  | 0.94998  | -0.68544 |
|                                           | H | -3.39105 | -0.25685 | 1.15002  |                                           | C | 3.94201  | -0.31021 | -0.82015 |
|                                           | H | -1.84675 | -1.10196 | 1.43673  |                                           | H | 3.72807  | -2.44168 | -0.61829 |
|                                           | H | -2.75944 | -3.18745 | 0.50262  |                                           | H | 1.57855  | 2.00641  | -0.08030 |
|                                           | H | -3.79211 | -2.61051 | 1.80223  |                                           | H | 3.89779  | 1.84271  | -0.94397 |
|                                           | H | -4.07813 | 0.19329  | -1.18297 |                                           | O | 0.11290  | -0.02221 | 0.65502  |

|                                    |   |          |          |          |                                    |   |          |          |          |
|------------------------------------|---|----------|----------|----------|------------------------------------|---|----------|----------|----------|
|                                    | H | -3.02695 | -0.35410 | -2.50834 |                                    | N | 5.30425  | -0.40580 | -1.30173 |
|                                    | H | -5.03244 | -1.82380 | -2.25299 |                                    | O | 5.89532  | 0.63691  | -1.58709 |
|                                    | H | -3.53442 | -2.71151 | -2.00953 |                                    | O | 5.81523  | -1.52238 | -1.40544 |
|                                    | H | -5.40878 | -1.67491 | 0.18417  |                                    | C | -1.21786 | 0.76158  | -0.50220 |
|                                    | H | -5.11483 | -3.36017 | -0.23061 |                                    | C | -1.72970 | 1.89401  | 0.35319  |
|                                    | N | -2.27154 | -0.68988 | -0.57457 |                                    | C | -2.42213 | 2.89705  | -0.33282 |
|                                    | H | -1.62529 | -1.42959 | -0.89458 |                                    | C | -1.53619 | 1.99759  | 1.73227  |
|                                    | C | 3.53024  | -1.24131 | -0.13460 |                                    | C | -2.94023 | 3.98979  | 0.35107  |
|                                    | C | 2.18703  | -1.37234 | 0.18935  |                                    | H | -2.54948 | 2.82666  | -1.40892 |
|                                    | C | 1.25097  | -0.28839 | 0.05826  |                                    | C | -2.04222 | 3.08871  | 2.42665  |
|                                    | C | 1.80682  | 0.94257  | -0.42195 |                                    | H | -0.96568 | 1.24296  | 2.25888  |
|                                    | C | 3.13528  | 1.07964  | -0.72421 |                                    | C | -2.74120 | 4.06293  | 1.72358  |
|                                    | C | 4.00229  | -0.02001 | -0.57941 |                                    | H | -3.48156 | 4.77200  | -0.16918 |
|                                    | H | 4.19886  | -2.08641 | -0.02652 |                                    | H | -1.89356 | 3.18679  | 3.49614  |
|                                    | H | 1.13793  | 1.78779  | -0.53499 |                                    | O | -0.74258 | 0.94702  | -1.60488 |
|                                    | H | 3.52823  | 2.02897  | -1.07217 |                                    | N | 1.24771  | -2.61529 | 0.18617  |
|                                    | O | 0.00653  | -0.41193 | 0.33112  |                                    | O | 0.02911  | -2.67713 | -0.01515 |
|                                    | N | 5.40165  | 0.12228  | -0.89264 |                                    | O | 1.90360  | -3.58272 | 0.56283  |
|                                    | O | 5.80288  | 1.21841  | -1.29445 |                                    | C | -3.34104 | -2.26000 | 0.84111  |
|                                    | O | 6.14524  | -0.85269 | -0.74972 |                                    | C | -2.64419 | -0.91031 | 0.93315  |
|                                    | C | -1.40896 | 0.58869  | -0.73975 |                                    | C | -3.04894 | -0.65434 | -1.47617 |
|                                    | C | -1.72826 | 1.73486  | 0.18369  |                                    | C | -3.73422 | -2.01098 | -1.44618 |
|                                    | C | -2.34834 | 2.83152  | -0.42496 |                                    | H | -3.36518 | -0.12628 | 1.16796  |
|                                    | C | -1.42687 | 1.77028  | 1.54698  |                                    | H | -1.85355 | -0.93097 | 1.68087  |
|                                    | C | -2.68951 | 3.95161  | 0.32252  |                                    | H | -2.60800 | -3.05978 | 0.66840  |
|                                    | H | -2.56014 | 2.81108  | -1.48984 |                                    | H | -3.85432 | -2.45905 | 1.78335  |
|                                    | C | -1.75408 | 2.88844  | 2.30272  |                                    | H | -3.76944 | 0.14744  | -1.29789 |
|                                    | H | -0.90862 | 0.94113  | 2.01211  |                                    | H | -2.54169 | -0.48643 | -2.42598 |
|                                    | C | -2.38600 | 3.95672  | 1.67753  |                                    | H | -4.53523 | -2.02308 | -2.18722 |
|                                    | H | -3.17419 | 4.80589  | -0.13668 |                                    | H | -3.01730 | -2.80589 | -1.69742 |
|                                    | H | -1.51798 | 2.93476  | 3.35992  |                                    | N | -2.02001 | -0.58082 | -0.38644 |
|                                    | O | -0.97670 | 0.75334  | -1.85799 |                                    | H | -1.28234 | -1.28527 | -0.55270 |
|                                    | N | 1.76188  | -2.67640 | 0.65670  |                                    | O | -4.32401 | -2.26552 | -0.18223 |
|                                    | O | 0.74738  | -2.76950 | 1.34584  |                                    | N | -3.28064 | 5.21479  | 2.45634  |
|                                    | O | 2.45312  | -3.65537 | 0.34877  |                                    | O | -3.08974 | 5.27014  | 3.66806  |
|                                    | N | -2.73675 | 5.13799  | 2.47647  |                                    | O | -3.89734 | 6.06610  | 1.82175  |
|                                    | O | -2.45567 | 5.13120  | 3.67151  |                                    |   |          |          |          |
|                                    | O | -3.29448 | 6.07334  | 1.90965  |                                    |   |          |          |          |
| <b>TS1<sub>gbb</sub></b><br>(MeCN) | C | -3.53113 | -2.45410 | 0.73867  | <b>TS1<sub>gbc</sub></b><br>(MeCN) | C | 3.53606  | -1.07892 | -0.01510 |
|                                    | C | -2.69085 | -1.18286 | 0.76186  |                                    | C | 2.18082  | -1.28661 | 0.19885  |

|   |          |          |          |   |          |          |          |
|---|----------|----------|----------|---|----------|----------|----------|
| C | -3.57466 | -0.54252 | -1.46224 | C | 1.18926  | -0.29420 | -0.10881 |
| C | -4.43464 | -1.79824 | -1.50169 | C | 1.69636  | 0.93779  | -0.63331 |
| C | -4.79662 | -2.27953 | -0.09808 | C | 3.03567  | 1.15267  | -0.82500 |
| H | -3.24384 | -0.35665 | 1.21221  | C | 3.96043  | 0.13833  | -0.51527 |
| H | -1.75589 | -1.33059 | 1.29658  | H | 4.24872  | -1.85928 | 0.22200  |
| H | -2.92843 | -3.28169 | 0.34541  | H | 0.98554  | 1.71594  | -0.88132 |
| H | -3.77636 | -2.70814 | 1.77386  | H | 3.39172  | 2.10034  | -1.21472 |
| H | -4.11037 | 0.29321  | -1.00382 | O | -0.06344 | -0.51206 | 0.06098  |
| H | -3.24261 | -0.24647 | -2.45635 | N | 5.36986  | 0.36478  | -0.71621 |
| H | -5.33185 | -1.56996 | -2.08417 | O | 5.72844  | 1.45608  | -1.16761 |
| H | -3.89782 | -2.58628 | -2.04337 | O | 6.16294  | -0.53714 | -0.43177 |
| H | -5.45725 | -1.54835 | 0.38277  | C | -1.43885 | 0.52938  | -0.84427 |
| H | -5.34859 | -3.22177 | -0.15293 | C | -1.67080 | 1.66242  | 0.10499  |
| N | -2.33711 | -0.76087 | -0.63451 | C | -2.20505 | 2.83313  | -0.45534 |
| H | -1.78812 | -1.52044 | -1.06555 | C | -1.38207 | 1.64323  | 1.46896  |
| C | 3.57563  | -1.04138 | -0.00152 | C | -2.46344 | 3.94135  | 0.33193  |
| C | 2.22332  | -1.26609 | 0.21100  | H | -2.41516 | 2.86906  | -1.52043 |
| C | 1.21945  | -0.28694 | -0.09370 | C | -1.62845 | 2.75512  | 2.26948  |
| C | 1.70903  | 0.95273  | -0.61357 | H | -0.92799 | 0.76687  | 1.91675  |
| C | 3.04626  | 1.18583  | -0.80307 | C | -2.17806 | 3.90956  | 1.70331  |
| C | 3.98401  | 0.18348  | -0.49697 | H | -2.88138 | 4.84763  | -0.09720 |
| H | 4.29806  | -1.81349 | 0.23325  | H | -1.37820 | 2.70693  | 3.32315  |
| H | 0.98947  | 1.72256  | -0.86043 | O | -1.12755 | 0.68184  | -2.00912 |
| H | 3.38960  | 2.13990  | -1.18857 | N | 1.80406  | -2.57667 | 0.74316  |
| O | -0.03121 | -0.52792 | 0.07754  | O | 0.74681  | -2.68494 | 1.36242  |
| N | 5.39085  | 0.42974  | -0.69591 | O | 2.58022  | -3.52434 | 0.57366  |
| O | 5.73498  | 1.52724  | -1.14304 | C | -3.61384 | -2.38742 | 0.69691  |
| O | 6.19534  | -0.46258 | -0.41383 | C | -2.72249 | -1.15613 | 0.75111  |
| C | -1.38046 | 0.47818  | -0.82379 | C | -3.62543 | -0.53552 | -1.44424 |
| C | -1.63226 | 1.62233  | 0.11370  | C | -4.48102 | -1.79033 | -1.38539 |
| C | -2.17968 | 2.77966  | -0.46040 | H | -3.24787 | -0.32715 | 1.22558  |
| C | -1.34940 | 1.62306  | 1.47860  | H | -1.79377 | -1.36783 | 1.27736  |
| C | -2.45532 | 3.89390  | 0.31319  | H | -3.06615 | -3.23988 | 0.26928  |
| H | -2.38527 | 2.80117  | -1.52671 | H | -3.91957 | -2.64983 | 1.71107  |
| C | -1.61277 | 2.74098  | 2.26628  | H | -4.15417 | 0.31703  | -1.01225 |
| H | -0.88927 | 0.75643  | 1.93901  | H | -3.33319 | -0.30498 | -2.46865 |
| C | -2.17461 | 3.88172  | 1.68559  | H | -5.42352 | -1.60531 | -1.90355 |
| H | -2.88302 | 4.78985  | -0.12798 | H | -3.96784 | -2.62411 | -1.88640 |
| H | -1.36648 | 2.70741  | 3.32149  | N | -2.37275 | -0.72930 | -0.64100 |
| O | -1.05610 | 0.63764  | -1.98842 | H | -1.81041 | -1.47881 | -1.07544 |

|                      |    |          |          |          |                      |   |          |          |          |
|----------------------|----|----------|----------|----------|----------------------|---|----------|----------|----------|
|                      | N  | 1.86285  | -2.56260 | 0.75311  |                      | O | -4.79569 | -2.14339 | -0.04898 |
|                      | O  | 0.82185  | -2.67770 | 1.39717  |                      | O | -2.45938 | 5.04311  | 2.39400  |
|                      | O  | 2.63763  | -3.50581 | 0.55646  |                      | C | -2.18615 | 5.06847  | 3.79229  |
|                      | O  | -2.47305 | 5.02029  | 2.36299  |                      | H | -1.11864 | 4.92712  | 3.98899  |
|                      | C  | -2.20400 | 5.06401  | 3.76122  |                      | H | -2.48981 | 6.05612  | 4.13748  |
|                      | H  | -1.13543 | 4.93746  | 3.96265  |                      | H | -2.76428 | 4.30449  | 4.32179  |
|                      | H  | -2.52028 | 6.05160  | 4.09529  |                      |   |          |          |          |
|                      | H  | -2.77421 | 4.29895  | 4.29787  |                      |   |          |          |          |
| <b>lgc</b><br>(MeCN) | C  | -2.66653 | -1.74187 | 0.09344  | <b>lgd</b><br>(MeCN) | C | -2.66974 | -1.74477 | 0.08118  |
|                      | C  | -1.28428 | -1.75352 | -0.01270 |                      | C | -1.28788 | -1.75463 | -0.02739 |
|                      | C  | -0.57678 | -0.57115 | -0.20134 |                      | C | -0.57995 | -0.57027 | -0.20616 |
|                      | C  | -1.27809 | 0.64016  | -0.28000 |                      | C | -1.28340 | 0.64072  | -0.27197 |
|                      | C  | -2.65797 | 0.67407  | -0.15072 |                      | C | -2.66287 | 0.67338  | -0.13905 |
|                      | C  | -3.33099 | -0.52286 | 0.02652  |                      | C | -3.33535 | -0.52544 | 0.02764  |
|                      | H  | -3.22219 | -2.66247 | 0.23583  |                      | H | -3.22466 | -2.66699 | 0.21556  |
|                      | H  | -0.72717 | -2.68343 | 0.05292  |                      | H | -0.73031 | -2.68486 | 0.02870  |
|                      | H  | -3.19167 | 1.61615  | -0.20199 |                      | H | -3.19686 | 1.61582  | -0.18006 |
|                      | O  | 0.78298  | -0.68603 | -0.33381 |                      | O | 0.77784  | -0.68293 | -0.34073 |
|                      | N  | -4.79194 | -0.49439 | 0.14739  |                      | N | -4.79564 | -0.49898 | 0.15103  |
|                      | O  | -5.35254 | 0.59531  | 0.09030  |                      | O | -5.35742 | 0.59079  | 0.10458  |
|                      | O  | -5.37340 | -1.56369 | 0.29899  |                      | O | -5.37662 | -1.56989 | 0.29421  |
|                      | C  | 3.02698  | -0.24066 | 0.26067  |                      | C | 3.02177  | -0.23421 | 0.25631  |
|                      | C  | 3.96511  | 0.36302  | 1.10363  |                      | C | 3.96438  | 0.36979  | 1.09627  |
|                      | C  | 3.45456  | -1.01203 | -0.82435 |                      | C | 3.45408  | -1.00492 | -0.82803 |
|                      | C  | 5.32338  | 0.20014  | 0.86920  |                      | C | 5.31973  | 0.20184  | 0.85264  |
|                      | H  | 3.62472  | 0.96165  | 1.94308  |                      | H | 3.62429  | 0.97127  | 1.93411  |
|                      | C  | 4.81229  | -1.17984 | -1.06651 |                      | C | 4.81417  | -1.16566 | -1.06271 |
|                      | H  | 2.73115  | -1.48243 | -1.48173 |                      | H | 2.73084  | -1.47420 | -1.48676 |
|                      | C  | 5.73242  | -0.57162 | -0.21633 |                      | C | 5.76649  | -0.56941 | -0.22835 |
|                      | H  | 6.05762  | 0.66625  | 1.51926  |                      | H | 6.04483  | 0.67839  | 1.50836  |
|                      | H  | 5.15351  | -1.77674 | -1.90687 |                      | H | 5.14204  | -1.76285 | -1.91027 |
|                      | C  | 1.59601  | -0.02810 | 0.55777  |                      | C | 1.59470  | -0.02131 | 0.55134  |
|                      | O  | 1.14676  | 0.62713  | 1.46905  |                      | O | 1.13727  | 0.63489  | 1.45952  |
|                      | N  | -0.60649 | 1.91814  | -0.52882 |                      | N | -0.61324 | 1.92067  | -0.51254 |
|                      | O  | -1.14655 | 2.93260  | -0.10374 |                      | O | -1.14098 | 2.92933  | -0.05859 |
|                      | O  | 0.43966  | 1.90517  | -1.16884 |                      | O | 0.41821  | 1.91561  | -1.17594 |
|                      | Cl | 7.43654  | -0.78065 | -0.51757 |                      | C | 7.23938  | -0.77154 | -0.46924 |
|                      |    |          |          |          |                      | H | 7.81203  | 0.12031  | -0.20337 |
|                      |    |          |          |          |                      | H | 7.61662  | -1.59713 | 0.14350  |
|                      |    |          |          |          |                      | H | 7.44405  | -1.01571 | -1.51398 |



|                      |         |          |          |          |                                    |         |          |          |          |
|----------------------|---------|----------|----------|----------|------------------------------------|---------|----------|----------|----------|
| <b>lge</b><br>(MeCN) | C       | -2.64977 | -1.70741 | 0.53849  | <b>TS1<sub>geb</sub></b><br>(MeCN) | C       | -3.00608 | -2.82968 | 0.63597  |
|                      | C       | -1.26558 | -1.70540 | 0.47391  |                                    | C       | -2.43805 | -1.41800 | 0.71890  |
|                      | C       | -0.57644 | -0.61085 | -0.04236 |                                    | C       | -2.90227 | -1.07948 | -1.69482 |
|                      | C       | -1.30742 | 0.49674  | -0.49594 |                                    | C       | -3.48207 | -2.48312 | -1.79672 |
|                      | C       | -2.69066 | 0.52597  | -0.41319 |                                    | C       | -4.05875 | -2.95373 | -0.46313 |
|                      | C       | -3.34162 | -0.58486 | 0.09653  |                                    | H       | -3.21900 | -0.69601 | 0.96459  |
|                      | H       | -3.18779 | -2.56130 | 0.93576  |                                    | H       | -1.63498 | -1.35298 | 1.44846  |
|                      | H       | -0.68950 | -2.55474 | 0.82886  |                                    | H       | -2.18939 | -3.54021 | 0.46042  |
|                      | H       | -3.24404 | 1.39295  | -0.75547 |                                    | H       | -3.42892 | -3.07251 | 1.61491  |
|                      | O       | 0.78358  | -0.71334 | -0.09714 |                                    | H       | -3.67261 | -0.34703 | -1.43823 |
|                      | N       | -4.80437 | -0.56832 | 0.16993  |                                    | H       | -2.41538 | -0.77306 | -2.61962 |
|                      | O       | -5.38991 | 0.43584  | -0.22374 |                                    | H       | -4.24940 | -2.46960 | -2.57599 |
|                      | O       | -5.36595 | -1.56118 | 0.62211  |                                    | H       | -2.69962 | -3.17303 | -2.13469 |
|                      | C       | 2.98291  | -0.00128 | 0.37719  |                                    | H       | -4.93377 | -2.34546 | -0.20531 |
|                      | C       | 3.89349  | 0.87233  | 0.99224  |                                    | H       | -4.40132 | -3.98873 | -0.54474 |
|                      | C       | 3.48965  | -1.07121 | -0.37716 |                                    | N       | -1.86186 | -1.00432 | -0.60609 |
|                      | C       | 5.25519  | 0.69274  | 0.86504  |                                    | H       | -1.09891 | -1.66007 | -0.83718 |
|                      | H       | 3.51481  | 1.70506  | 1.57807  |                                    | C       | 3.79740  | -0.35872 | 1.07109  |
|                      | C       | 4.84973  | -1.26378 | -0.51482 |                                    | C       | 2.47141  | -0.76588 | 1.08792  |
|                      | H       | 2.80777  | -1.76165 | -0.86304 |                                    | C       | 1.40435  | 0.04989  | 0.57793  |
|                      | C       | 5.77826  | -0.38614 | 0.10388  |                                    | C       | 1.80127  | 1.33015  | 0.07312  |
|                      | H       | 5.91973  | 1.39237  | 1.35699  |                                    | C       | 3.10725  | 1.74386  | 0.07615  |
|                      | H       | 5.19640  | -2.10188 | -1.10677 |                                    | C       | 4.11139  | 0.89382  | 0.57539  |
|                      | C       | 1.55753  | 0.24305  | 0.54730  |                                    | H       | 4.57083  | -1.01191 | 1.45625  |
|                      | O       | 1.03530  | 1.14346  | 1.17247  |                                    | H       | 1.03174  | 1.98283  | -0.31984 |
|                      | N       | -0.66000 | 1.65765  | -1.10941 |                                    | H       | 3.37609  | 2.72389  | -0.30333 |
|                      | O       | -1.20555 | 2.74716  | -0.97446 |                                    | O       | 0.18744  | -0.35318 | 0.56244  |
|                      | O       | 0.37004  | 1.47162  | -1.74830 |                                    | N       | 5.48532  | 1.32858  | 0.57839  |
|                      | N       | 7.12270  | -0.57240 | -0.02768 |                                    | O       | 5.74609  | 2.44772  | 0.12763  |
|                      | C       | 7.63526  | -1.68295 | -0.81542 |                                    | O       | 6.34806  | 0.56895  | 1.02835  |
|                      | H       | 8.72383  | -1.66165 | -0.79948 |                                    | C       | -1.14129 | 0.38003  | -0.69958 |
|                      | H       | 7.31189  | -2.64867 | -0.41065 |                                    | C       | -1.75788 | 1.49075  | 0.10432  |
|                      | H       | 7.31270  | -1.62006 | -1.86095 |                                    | C       | -2.38980 | 2.49326  | -0.63825 |
| C                    | 8.05590 | 0.34142  | 0.61319  | C        | -1.72335                           | 1.58957 | 1.49719  |          |          |
| H                    | 9.07471 | 0.02653  | 0.39282  | C        | -2.99974                           | 3.57047 | -0.00380 |          |          |
| H                    | 7.93390 | 1.36706  | 0.24671  | H        | -2.40150                           | 2.43444 | -1.72270 |          |          |
| H                    | 7.93355 | 0.34595  | 1.70223  | C        | -2.32132                           | 2.66710 | 2.14039  |          |          |
|                      |         |          |          | H        | -1.20316                           | 0.84338 | 2.08565  |          |          |
|                      |         |          |          | C        | -2.96018                           | 3.64511 | 1.38391  |          |          |
|                      |         |          |          | H        | -3.49323                           | 4.34438 | -0.58412 |          |          |

|                                    |   |          |          |          |                                    |          |          |          |          |
|------------------------------------|---|----------|----------|----------|------------------------------------|----------|----------|----------|----------|
|                                    |   |          | H        | -2.28378 | 2.74825                            | 3.22263  |          |          |          |
|                                    |   |          | O        | -0.59919 | 0.56506                            | -1.77052 |          |          |          |
|                                    |   |          | N        | 2.20693  | -2.07918                           | 1.64242  |          |          |          |
|                                    |   |          | O        | 1.09960  | -2.31892                           | 2.12063  |          |          |          |
|                                    |   |          | O        | 3.12396  | -2.90886                           | 1.62649  |          |          |          |
|                                    |   |          | Cl       | -3.71529 | 4.99615                            | 2.19230  |          |          |          |
| <b>TS1<sub>gcc</sub></b><br>(MeCN) | C | 3.41721  | -0.69510 | 0.42786  | <b>TS1<sub>gdb</sub></b><br>(MeCN) | C        | -3.16638 | -2.92653 | 0.90408  |
|                                    | C | 2.06554  | -1.00582 | 0.44214  |                                    | C        | -2.50126 | -1.56223 | 0.76463  |
|                                    | C | 1.11088  | -0.34936 | -0.40232 |                                    | C        | -3.28644 | -1.40573 | -1.58060 |
|                                    | C | 1.63381  | 0.69914  | -1.22214 |                                    | C        | -3.96786 | -2.76175 | -1.46118 |
|                                    | C | 2.96366  | 1.03273  | -1.21580 |                                    | C        | -4.37394 | -3.06444 | -0.02032 |
|                                    | C | 3.85967  | 0.32820  | -0.39128 |                                    | H        | -3.18882 | -0.76127 | 1.04186  |
|                                    | H | 4.10786  | -1.23287 | 1.06628  |                                    | H        | -1.59905 | -1.49304 | 1.36711  |
|                                    | H | 0.94449  | 1.21974  | -1.87643 |                                    | H        | -2.43282 | -3.71269 | 0.68810  |
|                                    | H | 3.33551  | 1.83098  | -1.84933 |                                    | H        | -3.45718 | -3.04725 | 1.95151  |
|                                    | O | -0.12228 | -0.70834 | -0.43625 |                                    | H        | -3.96063 | -0.59374 | -1.29503 |
|                                    | N | 5.26033  | 0.67263  | -0.39303 |                                    | H        | -2.92014 | -1.22272 | -2.58983 |
|                                    | O | 5.63560  | 1.59210  | -1.12535 |                                    | H        | -4.83814 | -2.75702 | -2.12372 |
|                                    | O | 6.02831  | 0.03702  | 0.33428  |                                    | H        | -3.29093 | -3.53996 | -1.83366 |
|                                    | C | -1.58696 | 0.45294  | -1.06289 |                                    | H        | -5.15984 | -2.36771 | 0.29460  |
|                                    | C | -1.60857 | 1.49855  | 0.01484  |                                    | H        | -4.79268 | -4.07198 | 0.05005  |
|                                    | C | -2.09142 | 2.75108  | -0.37784 |                                    | N        | -2.09777 | -1.31659 | -0.66075 |
|                                    | C | -1.17830 | 1.31316  | 1.33218  |                                    | H        | -1.42233 | -2.04858 | -0.92953 |
|                                    | C | -2.16716 | 3.80141  | 0.53044  |                                    | C        | 3.74745  | -0.69634 | 0.30488  |
|                                    | H | -2.40930 | 2.90572  | -1.40448 |                                    | C        | 2.42329  | -1.06922 | 0.48431  |
|                                    | C | -1.24260 | 2.35913  | 2.24490  |                                    | C        | 1.32590  | -0.29088 | -0.01642 |
|                                    | H | -0.76315 | 0.36396  | 1.64920  |                                    | C        | 1.68953  | 0.91348  | -0.69883 |
|                                    | C | -1.74191 | 3.59286  | 1.83750  |                                    | C        | 2.99589  | 1.29570  | -0.85728 |
|                                    | H | -2.54764 | 4.77053  | 0.22184  |                                    | C        | 4.03029  | 0.48606  | -0.35423 |
|                                    | H | -0.89845 | 2.21665  | 3.26495  |                                    | H        | 4.54426  | -1.31986 | 0.69147  |
|                                    | O | -1.43692 | 0.71742  | -2.23738 |                                    | H        | 0.89661  | 1.53380  | -1.09632 |
|                                    | N | 1.64938  | -2.04706 | 1.36322  |                                    | H        | 3.24099  | 2.22027  | -1.36898 |
|                                    | O | 0.50743  | -2.02056 | 1.82314  |                                    | O        | 0.10725  | -0.66880 | 0.12960  |
|                                    | O | 2.47566  | -2.90971 | 1.67366  |                                    | N        | 5.40457  | 0.88910  | -0.51995 |
|                                    | C | -3.63291 | -2.53400 | 0.49962  |                                    | O        | 5.63688  | 1.94718  | -1.11130 |
|                                    | C | -2.71952 | -1.31877 | 0.54764  |                                    | O        | 6.29468  | 0.16392  | -0.06708 |
|                                    | C | -3.85137 | -0.52154 | -1.47972 |                                    | C        | -1.30136 | -0.00114 | -0.99542 |
|                                    | C | -4.71918 | -1.76793 | -1.41774 |                                    | C        | -1.76380 | 1.22574  | -0.26107 |
|                                    | H | -3.18002 | -0.52402 | 1.13504  |                                    | C        | -2.42927 | 2.18293  | -1.03211 |
|                                    | H | -1.74248 | -1.57483 | 0.95299  |                                    | C        | -1.56886 | 1.47130  | 1.10138  |

|                                           |                              |                                           |                             |
|-------------------------------------------|------------------------------|-------------------------------------------|-----------------------------|
|                                           | H -3.15246 -3.35532 -0.05187 |                                           | C -2.90676 3.35319 -0.44825 |
|                                           | H -3.82627 -2.87207 1.51896  |                                           | H -2.57065 2.00985 -2.09520 |
|                                           | H -4.30973 0.30109 -0.92619  |                                           | C -2.04019 2.64652 1.67304  |
|                                           | H -3.67289 -0.21603 -2.51045 |                                           | H -1.02532 0.75882 1.71105  |
|                                           | H -5.71029 -1.53184 -1.80879 |                                           | C -2.71979 3.60551 0.91251  |
|                                           | H -4.28302 -2.56523 -2.03711 |                                           | H -3.42820 4.08122 -1.06552 |
|                                           | N -2.51827 -0.79225 -0.84176 |                                           | H -1.87154 2.82438 2.73303  |
|                                           | H -2.02861 -1.51752 -1.39147 |                                           | O -0.91098 0.02653 -2.14901 |
|                                           | O -4.88680 -2.22089 -0.08527 |                                           | N 2.19460 -2.30807 1.20329  |
|                                           | Cl -1.82519 4.90426 2.98617  |                                           | O 1.13294 -2.46995 1.80209  |
|                                           |                              |                                           | O 3.09685 -3.15357 1.19769  |
|                                           |                              |                                           | C -3.20533 4.88491 1.54439  |
|                                           |                              |                                           | H -2.37433 5.58218 1.69313  |
|                                           |                              |                                           | H -3.94839 5.38316 0.91780  |
|                                           |                              |                                           | H -3.65228 4.69848 2.52448  |
| <b>TS1<sub>gdc</sub></b><br><b>(MeCN)</b> | C 3.75540 -0.63591 0.34259   | <b>TS1<sub>geb</sub></b><br><b>(MeCN)</b> | C -2.03186 3.92637 -1.07731 |
|                                           | C 2.43496 -1.03292 0.49943   |                                           | C -1.67275 2.47074 -0.80150 |
|                                           | C 1.33357 -0.28349 -0.03923  |                                           | C -2.51183 2.68698 1.51609  |
|                                           | C 1.69091 0.91753 -0.73368   |                                           | C -2.89295 4.13933 1.26318  |
|                                           | C 2.99217 1.32215 -0.87024   |                                           | C -3.19971 4.39358 -0.21135 |
|                                           | C 4.03062 0.54050 -0.32998   |                                           | H -2.51045 1.81147 -1.03564 |
|                                           | H 4.55541 -1.23677 0.75728   |                                           | H -0.79694 2.15913 -1.36568 |
|                                           | H 0.89400 1.51464 -1.15905   |                                           | H -1.15333 4.55850 -0.89962 |
|                                           | H 3.23164 2.24204 -1.39295   |                                           | H -2.27171 4.01374 -2.14093 |
|                                           | O 0.12039 -0.67760 0.08197   |                                           | H -3.33681 2.01093 1.27594  |
|                                           | N 5.39982 0.96690 -0.47218   |                                           | H -2.20987 2.52073 2.54921  |
|                                           | O 5.62523 2.02049 -1.07461   |                                           | H -3.75709 4.37327 1.89170  |
|                                           | O 6.29382 0.26594 0.01070    |                                           | H -2.07517 4.79044 1.59494  |
|                                           | C -1.34345 -0.00555 -1.04692 |                                           | H -4.10876 3.85083 -0.49670 |
|                                           | C -1.80218 1.20644 -0.29435  |                                           | H -3.39592 5.45620 -0.37883 |
|                                           | C -2.47143 2.17326 -1.05096  |                                           | N -1.35608 2.27105 0.65074  |
|                                           | C -1.59776 1.43446 1.06996   |                                           | H -0.54681 2.86542 0.88490  |
|                                           | C -2.94662 3.33477 -0.44924  |                                           | C 4.05248 -0.06377 -0.42760 |
|                                           | H -2.61495 2.01538 -2.11614  |                                           | C 2.87610 0.65571 -0.57730  |
|                                           | C -2.06750 2.60152 1.65875   |                                           | C 1.67230 0.32373 0.12708   |
|                                           | H -1.04220 0.71925 1.66534   |                                           | C 1.75289 -0.82087 0.97966  |
|                                           | C -2.75595 3.56730 0.91475   |                                           | C 2.90750 -1.54862 1.11039  |
|                                           | H -3.46617 4.07334 -1.05538  |                                           | C 4.06259 -1.16762 0.40536  |
|                                           | H -1.88636 2.76958 2.71815   |                                           | H 4.94247 0.23026 -0.97046  |
|                                           | O -0.97305 0.02014 -2.20258  |                                           | H 0.87082 -1.10696 1.53683  |

|   |          |          |          |   |          |          |          |
|---|----------|----------|----------|---|----------|----------|----------|
| N | 2.21414  | -2.26354 | 1.23302  | H | 2.93882  | -2.41832 | 1.75799  |
| O | 1.13088  | -2.45163 | 1.78486  | O | 0.60783  | 1.03607  | -0.00110 |
| O | 3.14299  | -3.07832 | 1.28827  | N | 5.27681  | -1.93368 | 0.54562  |
| C | -3.15475 | -2.96043 | 0.84358  | O | 5.26564  | -2.91569 | 1.29259  |
| C | -2.46162 | -1.61057 | 0.73916  | O | 6.27756  | -1.57934 | -0.08331 |
| C | -3.29679 | -1.48008 | -1.56537 | C | -0.85501 | 0.84189  | 1.13283  |
| C | -3.95808 | -2.83036 | -1.34265 | C | -1.60602 | -0.31022 | 0.54208  |
| H | -3.13493 | -0.81228 | 1.05162  | C | -2.41086 | -1.04896 | 1.41679  |
| H | -1.54927 | -1.59148 | 1.33195  | C | -1.55123 | -0.71848 | -0.79461 |
| H | -2.45919 | -3.77108 | 0.58183  | C | -3.15453 | -2.13398 | 0.98017  |
| H | -3.48551 | -3.11085 | 1.87256  | H | -2.44947 | -0.76821 | 2.46557  |
| H | -3.97422 | -0.66583 | -1.29900 | C | -2.28073 | -1.80638 | -1.24551 |
| H | -2.97350 | -1.36490 | -2.59990 | H | -0.90360 | -0.20264 | -1.49496 |
| H | -4.88005 | -2.87681 | -1.92475 | C | -3.11986 | -2.53995 | -0.37366 |
| H | -3.29386 | -3.63930 | -1.68022 | H | -3.75966 | -2.66855 | 1.70253  |
| N | -2.08541 | -1.34930 | -0.68737 | H | -2.18505 | -2.09131 | -2.28635 |
| H | -1.38824 | -2.05680 | -0.97101 | O | -0.48761 | 0.86686  | 2.29986  |
| O | -4.30684 | -3.02066 | 0.01791  | N | 2.92230  | 1.78529  | -1.48782 |
| C | -3.28541 | 4.81395  | 1.57533  | O | 1.88901  | 2.15353  | -2.04321 |
| H | -3.48884 | 5.59870  | 0.84335  | O | 4.01776  | 2.32295  | -1.68368 |
| H | -4.22078 | 4.60208  | 2.10373  | N | -3.86562 | -3.60296 | -0.82323 |
| H | -2.57762 | 5.20464  | 2.31092  | C | -3.68735 | -4.08655 | -2.18184 |
|   |          |          |          | H | -2.66545 | -4.44333 | -2.36803 |
|   |          |          |          | H | -4.37278 | -4.91444 | -2.36021 |
|   |          |          |          | H | -3.91738 | -3.30608 | -2.91430 |
|   |          |          |          | C | -4.58124 | -4.43447 | 0.12959  |
|   |          |          |          | H | -5.32238 | -3.85243 | 0.68706  |
|   |          |          |          | H | -5.11649 | -5.21641 | -0.40804 |
|   |          |          |          | H | -3.90800 | -4.91595 | 0.85142  |

|                                    |   |          |          |          |                      |                      |         |          |          |          |
|------------------------------------|---|----------|----------|----------|----------------------|----------------------|---------|----------|----------|----------|
| <b>TS1<sub>gac</sub></b><br>(MeCN) | C | -4.04376 | -0.06354 | 0.43803  | <b>2ga</b><br>(MeCN) | C                    | 5.54988 | 0.69319  | -0.46255 |          |
|                                    | C | -2.86834 | 0.66011  | 0.57973  |                      | C                    | 4.05027 | 0.95670  | -0.29754 |          |
|                                    | C | -1.67504 | 0.34465  | -0.15165 |                      | C                    | 3.60587 | -1.40050 | 0.06951  |          |
|                                    | C | -1.76650 | -0.78756 | -1.02119 |                      | C                    | 5.09067 | -1.78139 | -0.06954 |          |
|                                    | C | -2.91962 | -1.51784 | -1.14460 |                      | C                    | 5.96193 | -0.56971 | 0.30094  |          |
|                                    | C | -4.06406 | -1.15316 | -0.41282 |                      | H                    | 3.84084 | 1.21100  | 0.74992  |          |
|                                    | H | -4.92546 | 0.21691  | 1.00108  |                      | H                    | 3.73862 | 1.81619  | -0.89989 |          |
|                                    | H | -0.89233 | -1.05996 | -1.59799 |                      | H                    | 5.78421 | 0.58749  | -1.52863 |          |
|                                    | H | -2.95914 | -2.37643 | -1.80643 |                      | H                    | 6.12127 | 1.55623  | -0.10161 |          |
|                                    | O | -0.61065 | 1.05568  | -0.03562 |                      | H                    | 3.37965 | -1.23775 | 1.13124  |          |
|                                    | N | -5.27737 | -1.92159 | -0.54502 |                      | H                    | 2.96931 | -2.22688 | -0.26576 |          |
|                                    | O | -5.27521 | -2.89103 | -1.30849 |                      | H                    | 5.29076 | -2.57963 | 0.65664  |          |
|                                    | O | -6.26879 | -1.58215 | 0.10667  |                      | H                    | 5.85863 | -0.37765 | 1.37692  |          |
|                                    | C | 0.88913  | 0.84767  | -1.17078 |                      | H                    | 7.01962 | -0.79660 | 0.12496  |          |
|                                    | C | 1.61692  | -0.30713 | -0.56753 |                      | N                    | 3.20489 | -0.18823 | -0.65048 |          |
|                                    | C | 2.42221  | -1.05920 | -1.43159 |                      | H                    | 3.26863 | -0.35168 | -1.65487 |          |
|                                    | C | 1.54237  | -0.70866 | 0.77100  |                      | C                    | 5.41606 | -2.33575 | -1.45992 |          |
|                                    | C | 3.14890  | -2.14960 | -0.98220 |                      | H                    | 6.47172 | -2.61677 | -1.53210 |          |
|                                    | H | 2.47627  | -0.78283 | -2.48088 |                      | H                    | 4.81853 | -3.22831 | -1.67378 |          |
|                                    | C | 2.25474  | -1.80170 | 1.23412  |                      | H                    | 5.21829 | -1.61037 | -2.25544 |          |
|                                    | H | 0.89117  | -0.18410 | 1.46147  |                      | <b>2gb</b><br>(MeCN) | C       | 5.53597  | 0.64385  | -0.43398 |
|                                    | C | 3.09463  | -2.54912 | 0.37357  |                      |                      | C       | 4.04185  | 0.94951  | -0.30090 |
|                                    | H | 3.75680  | -2.69363 | -1.69506 |                      |                      | C       | 3.59686  | -1.39533 | 0.08851  |
|                                    | H | 2.14530  | -2.08106 | 2.27508  |                      |                      | C       | 5.09099  | -1.70085 | -0.04480 |
|                                    | O | 0.54160  | 0.89084  | -2.33925 | H                    |                      | 3.82168 | 1.23473  | 0.73622  |          |
|                                    | N | -2.90463 | 1.77397  | 1.50885  | H                    |                      | 3.76575 | 1.79991  | -0.93384 |          |
|                                    | O | -1.85912 | 2.16047  | 2.02890  | H                    |                      | 5.78144 | 0.49269  | -1.49340 |          |
|                                    | O | -4.00351 | 2.28259  | 1.75712  | H                    |                      | 6.13439 | 1.49165  | -0.08305 |          |
|                                    | C | 2.09272  | 3.91442  | 1.03967  | H                    |                      | 3.35130 | -1.24396 | 1.14787  |          |
|                                    | C | 1.67329  | 2.47344  | 0.79186  | H                    |                      | 2.99844 | -2.24316 | -0.26233 |          |
|                                    | C | 2.53067  | 2.72320  | -1.48988 | H                    |                      | 5.36738 | -2.55142 | 0.58780  |          |
|                                    | C | 2.91974  | 4.14766  | -1.13029 | N                    |                      | 3.18509 | -0.19174 | -0.64343 |          |
|                                    | H | 2.48665  | 1.79330  | 1.04510  | H                    |                      | 3.26953 | -0.37400 | -1.64466 |          |
|                                    | H | 0.77974  | 2.22053  | 1.35989  | H                    |                      | 5.31079 | -1.98592 | -1.08206 |          |
|                                    | H | 1.25569  | 4.59883  | 0.83799  | N                    |                      | 5.94764 | -0.55970 | 0.29786  |          |
|                                    | H | 2.38321  | 4.02664  | 2.08563  | H                    |                      | 5.86328 | -0.37747 | 1.29905  |          |
|                                    | H | 3.35032  | 2.03155  | -1.28353 |                      |                      |         |          |          |          |
|                                    | H | 2.24263  | 2.64585  | -2.53820 |                      |                      |         |          |          |          |
|                                    | H | 3.81986  | 4.42440  | -1.68195 |                      |                      |         |          |          |          |
|                                    | H | 2.11497  | 4.84365  | -1.40898 |                      |                      |         |          |          |          |

|                     |   |          |          |          |                      |   |          |          |          |
|---------------------|---|----------|----------|----------|----------------------|---|----------|----------|----------|
|                     | N | 1.36474  | 2.28138  | -0.65927 |                      |   |          |          |          |
|                     | H | 0.54769  | 2.86576  | -0.89658 |                      |   |          |          |          |
|                     | O | 3.21609  | 4.27393  | 0.25072  |                      |   |          |          |          |
|                     | N | 3.82031  | -3.61797 | 0.83459  |                      |   |          |          |          |
|                     | C | 4.56769  | -4.44243 | -0.09981 |                      |   |          |          |          |
|                     | H | 5.08140  | -5.23095 | 0.44884  |                      |   |          |          |          |
|                     | H | 3.91754  | -4.91589 | -0.84700 |                      |   |          |          |          |
|                     | H | 5.32855  | -3.85768 | -0.62777 |                      |   |          |          |          |
|                     | C | 3.65138  | -4.07349 | 2.20411  |                      |   |          |          |          |
|                     | H | 4.32228  | -4.91172 | 2.38846  |                      |   |          |          |          |
|                     | H | 3.90425  | -3.28472 | 2.92045  |                      |   |          |          |          |
|                     | H | 2.62560  | -4.40773 | 2.40746  |                      |   |          |          |          |
| <b>1h</b><br>(MeCN) | S | -1.44391 | -0.63395 | 0.84082  | <b>2gc</b><br>(MeCN) | C | -1.14730 | -0.99799 | 0.14001  |
|                     | O | -0.97925 | 0.42632  | 1.71916  |                      | C | -1.25490 | 0.52505  | 0.03137  |
|                     | O | -1.34055 | -2.01643 | 1.26600  |                      | C | 1.20972  | 0.66006  | 0.00004  |
|                     | O | -0.56795 | -0.48204 | -0.57683 |                      | C | 1.26462  | -0.86618 | 0.10599  |
|                     | C | 0.80336  | -0.42744 | -0.45889 |                      | H | -1.37742 | 0.81329  | -1.02104 |
|                     | C | 1.47847  | 0.77071  | -0.19005 |                      | H | -2.12155 | 0.89554  | 0.58533  |
|                     | C | 1.52914  | -1.60112 | -0.62768 |                      | H | -1.17761 | -1.28514 | 1.19744  |
|                     | C | 2.85860  | 0.80072  | -0.07855 |                      | H | -2.00638 | -1.46215 | -0.35276 |
|                     | C | 2.91448  | -1.58575 | -0.54324 |                      | H | 1.27227  | 0.96629  | -1.05267 |
|                     | H | 0.99058  | -2.52256 | -0.82765 |                      | H | 2.03085  | 1.12932  | 0.54296  |
|                     | C | 3.55344  | -0.38330 | -0.26835 |                      | H | 2.15472  | -1.23694 | -0.41016 |
|                     | H | 3.37652  | 1.72807  | 0.13949  |                      | N | -0.04621 | 1.14935  | 0.55917  |
|                     | H | 3.49157  | -2.49368 | -0.68200 |                      | H | 1.35513  | -1.14750 | 1.16140  |
|                     | C | -3.03866 | -0.28717 | 0.18069  |                      | N | 0.08319  | -1.53370 | -0.44153 |
|                     | C | -3.42502 | 1.04414  | 0.03440  |                      | H | 0.06201  | -1.40974 | -1.45483 |
|                     | C | -3.86433 | -1.35425 | -0.16550 |                      | C | -0.08419 | 2.12506  | 1.48548  |
|                     | C | -4.68935 | 1.30767  | -0.48084 |                      | O | 0.89592  | 2.70438  | 1.96144  |
|                     | H | -2.75712 | 1.85207  | 0.31821  |                      | H | -1.11143 | 2.37454  | 1.80185  |
|                     | C | -5.12613 | -1.06955 | -0.67898 |                      |   |          |          |          |
|                     | H | -3.53239 | -2.37926 | -0.02993 |                      |   |          |          |          |
|                     | C | -5.53393 | 0.25475  | -0.83597 |                      |   |          |          |          |
|                     | H | -5.01599 | 2.33637  | -0.60304 |                      |   |          |          |          |
|                     | H | -5.79052 | -1.88368 | -0.95391 |                      |   |          |          |          |
|                     | H | -6.52126 | 0.46937  | -1.23648 |                      |   |          |          |          |
|                     | N | 5.01828  | -0.35741 | -0.17116 |                      |   |          |          |          |
|                     | O | 5.61981  | -1.41273 | -0.33726 |                      |   |          |          |          |
|                     | O | 5.55782  | 0.71699  | 0.07079  |                      |   |          |          |          |
|                     | N | 0.76741  | 2.04358  | -0.03026 |                      |   |          |          |          |

|                                   |   |          |          |          |                                     |   |          |          |          |
|-----------------------------------|---|----------|----------|----------|-------------------------------------|---|----------|----------|----------|
|                                   | O | 1.24077  | 2.85205  | 0.76002  |                                     |   |          |          |          |
|                                   | O | -0.23266 | 2.23533  | -0.71084 |                                     |   |          |          |          |
| <b>TS2<sub>hc</sub></b><br>(MeCN) | S | 1.00259  | 0.11692  | 0.33218  | <b>TS2<sub>h2ga</sub></b><br>(MeCN) | S | 1.12752  | 0.19646  | -0.82237 |
|                                   | O | 1.36502  | 0.59695  | 1.65053  |                                     | O | 1.39889  | 1.27487  | -1.75448 |
|                                   | O | 0.83665  | 0.91187  | -0.87212 |                                     | O | 0.87445  | -1.19750 | -1.15274 |
|                                   | O | -1.00522 | 0.36631  | 0.94979  |                                     | O | -0.82116 | 0.75759  | -0.87556 |
|                                   | C | -2.10206 | 0.52104  | 0.29035  |                                     | C | -1.90612 | 0.11834  | -0.55657 |
|                                   | C | -2.17258 | 0.59535  | -1.13574 |                                     | C | -1.95202 | -1.24605 | -0.15164 |
|                                   | C | -3.35654 | 0.67471  | 0.97118  |                                     | C | -3.17268 | 0.77665  | -0.64584 |
|                                   | C | -3.35688 | 0.79217  | -1.79997 |                                     | C | -3.13782 | -1.87820 | 0.13906  |
|                                   | H | -1.25266 | 0.51656  | -1.69897 |                                     | H | -1.02699 | -1.80320 | -0.10025 |
|                                   | C | -4.54971 | 0.90365  | 0.30552  |                                     | C | -4.37277 | 0.13708  | -0.38655 |
|                                   | C | -4.55151 | 0.94559  | -1.07789 |                                     | C | -4.35021 | -1.18547 | 0.02271  |
|                                   | H | -3.37677 | 0.83888  | -2.88356 |                                     | H | -3.14177 | -2.91759 | 0.44952  |
|                                   | H | -5.46851 | 1.03102  | 0.86519  |                                     | H | -5.30951 | 0.67238  | -0.48736 |
|                                   | C | 0.56895  | -1.59851 | 0.21774  |                                     | C | 1.07595  | 0.63641  | 0.89804  |
|                                   | C | 0.58491  | -2.35950 | 1.38319  |                                     | C | 1.22661  | 1.97760  | 1.23757  |
|                                   | C | 0.23154  | -2.12372 | -1.02559 |                                     | C | 0.88341  | -0.36487 | 1.84386  |
|                                   | C | 0.25552  | -3.70769 | 1.28773  |                                     | C | 1.18702  | 2.32072  | 2.58531  |
|                                   | H | 0.83375  | -1.90870 | 2.33941  |                                     | H | 1.35866  | 2.73422  | 0.46982  |
|                                   | C | -0.09669 | -3.47537 | -1.09730 |                                     | C | 0.84461  | 0.00095  | 3.18759  |
|                                   | H | 0.21796  | -1.50216 | -1.91625 |                                     | H | 0.76587  | -1.40348 | 1.54953  |
|                                   | C | -0.08300 | -4.26251 | 0.05296  |                                     | C | 0.99664  | 1.33643  | 3.55587  |
|                                   | H | 0.25874  | -4.32329 | 2.18274  |                                     | H | 1.30066  | 3.36144  | 2.87533  |
|                                   | H | -0.36462 | -3.90911 | -2.05650 |                                     | H | 0.69455  | -0.76377 | 3.94440  |
|                                   | H | -0.34113 | -5.31610 | -0.01181 |                                     | H | 0.96464  | 1.61357  | 4.60613  |
|                                   | N | -5.79472 | 1.15560  | -1.77627 |                                     | N | -5.59515 | -1.85338 | 0.32356  |
|                                   | O | -6.82939 | 1.29164  | -1.11745 |                                     | O | -6.64741 | -1.22127 | 0.20633  |
|                                   | O | -5.77436 | 1.19148  | -3.00975 |                                     | O | -5.55328 | -3.03128 | 0.68578  |
|                                   | N | -3.43603 | 0.61678  | 2.42126  |                                     | C | 5.54293  | 0.64754  | -0.61023 |
|                                   | O | -4.32077 | 1.27918  | 2.97414  |                                     | C | 4.06643  | 0.96974  | -0.39423 |
|                                   | O | -2.64973 | -0.09655 | 3.03801  |                                     | C | 3.59340  | -1.38338 | 0.13929  |
|                                   | C | 5.22546  | -1.10073 | 0.51589  |                                     | C | 5.06523  | -1.78300 | -0.03443 |
|                                   | C | 3.74016  | -1.08682 | 0.85651  |                                     | C | 5.96626  | -0.56554 | 0.22036  |
|                                   | C | 3.28222  | -0.71754 | -1.51460 |                                     | H | 3.88658  | 1.24945  | 0.64764  |
|                                   | C | 4.78652  | -0.74346 | -1.75755 |                                     | H | 3.73378  | 1.78779  | -1.03523 |
|                                   | H | 3.33653  | -2.10043 | 0.81158  |                                     | H | 5.72619  | 0.47453  | -1.67648 |
|                                   | H | 3.57056  | -0.67235 | 1.85199  |                                     | H | 6.13270  | 1.52605  | -0.33168 |
|                                   | H | 5.65242  | -0.09429 | 0.63516  |                                     | H | 3.40782  | -1.11100 | 1.18162  |
|                                   | H | 5.75070  | -1.78199 | 1.18773  |                                     | H | 2.92585  | -2.20540 | -0.12709 |

|                                     |                              |                                     |                              |
|-------------------------------------|------------------------------|-------------------------------------|------------------------------|
|                                     | H 2.87076 -1.72278 -1.62469  |                                     | H 5.26457 -2.52519 0.74675   |
|                                     | H 2.78309 -0.04168 -2.21139  |                                     | H 5.91600 -0.30091 1.28354   |
|                                     | H 4.99287 -1.16313 -2.74382  |                                     | H 7.00879 -0.82288 0.00924   |
|                                     | H 5.19597 0.27652 -1.71929   |                                     | N 3.21448 -0.20975 -0.68580  |
|                                     | N 3.00188 -0.26015 -0.13096  |                                     | H 3.33005 -0.44975 -1.67845  |
|                                     | H 3.32862 0.71499 -0.04243   |                                     | N -3.26475 2.17567 -1.04092  |
|                                     | O 5.44299 -1.56778 -0.80675  |                                     | O -4.25405 2.51925 -1.69411  |
|                                     |                              |                                     | O -2.38406 2.95500 -0.69126  |
|                                     |                              |                                     | C 5.33588 -2.45569 -1.38357  |
|                                     |                              |                                     | H 6.37703 -2.78544 -1.44200  |
|                                     |                              |                                     | H 4.69901 -3.33546 -1.51736  |
|                                     |                              |                                     | H 5.16221 -1.78959 -2.23511  |
| <b>TS<sub>2h2gb</sub></b><br>(MeCN) | S 1.30941 0.21013 -0.88874   | <b>TS<sub>2h2gc</sub></b><br>(MeCN) | S 0.90343 0.43932 -0.95070   |
|                                     | O 1.60555 1.44320 -1.59385   |                                     | O 1.05233 1.75731 -1.52970   |
|                                     | O 0.96324 -1.07256 -1.48127  |                                     | O 0.58770 -0.79092 -1.65171  |
|                                     | O -0.61515 0.86875 -0.73793  |                                     | O -1.17611 0.97959 -0.68966  |
|                                     | C -1.72473 0.23293 -0.51673  |                                     | C -2.23859 0.28063 -0.50696  |
|                                     | C -1.83451 -1.18242 -0.39586 |                                     | C -2.26069 -1.15084 -0.55430 |
|                                     | C -2.95679 0.95466 -0.42368  |                                     | C -3.51603 0.90039 -0.27929  |
|                                     | C -3.04421 -1.80382 -0.19654 |                                     | C -3.41317 -1.87279 -0.38312 |
|                                     | H -0.93965 -1.78140 -0.49211 |                                     | H -1.33178 -1.66710 -0.75709 |
|                                     | C -4.18214 0.33260 -0.25529  |                                     | C -4.68739 0.17360 -0.13542  |
|                                     | C -4.22049 -1.04520 -0.12473 |                                     | C -4.63368 -1.20887 -0.16942 |
|                                     | H -3.09604 -2.88338 -0.10390 |                                     | H -3.39304 -2.95675 -0.42023 |
|                                     | H -5.09098 0.92091 -0.21053  |                                     | H -5.62886 0.68672 0.01860   |
|                                     | C 1.33675 0.29154 0.88530    |                                     | C 0.90031 0.35954 0.81825    |
|                                     | C 1.57266 1.52620 1.48254    |                                     | C 1.05792 1.54529 1.53043    |
|                                     | C 1.12342 -0.87246 1.61612   |                                     | C 0.74645 -0.87957 1.43279   |
|                                     | C 1.59986 1.58725 2.87226    |                                     | C 1.07026 1.47592 2.91954    |
|                                     | H 1.71837 2.41721 0.87898    |                                     | H 1.15203 2.49686 1.01532    |
|                                     | C 1.15243 -0.78837 3.00642   |                                     | C 0.76022 -0.92475 2.82446   |
|                                     | H 0.93819 -1.82210 1.12290   |                                     | H 0.61409 -1.78654 0.84999   |
|                                     | C 1.39052 0.43479 3.63056    |                                     | C 0.92277 0.24643 3.56274    |
|                                     | H 1.78046 2.54001 3.36190    |                                     | H 1.18943 2.38695 3.49902    |
|                                     | H 0.98744 -1.68411 3.59845   |                                     | H 0.64122 -1.87969 3.32829   |
|                                     | H 1.41106 0.49193 4.71554    |                                     | H 0.93131 0.20207 4.64848    |
|                                     | N -5.49105 -1.70059 0.07898  |                                     | N -5.84466 -1.96722 0.00967  |
|                                     | O -6.51048 -1.00873 0.13288  |                                     | O -6.90529 -1.36061 0.18676  |
|                                     | O -5.50358 -2.92866 0.19045  |                                     | O -5.77421 -3.19953 -0.02137 |
|                                     | N -2.98519 2.40723 -0.52345  |                                     | N -3.64999 2.34486 -0.20837  |



|                                |    |          |          |          |                                |    |          |          |          |
|--------------------------------|----|----------|----------|----------|--------------------------------|----|----------|----------|----------|
|                                | O  | -3.97473 | 2.92319  | -1.05117 |                                | O  | -4.73167 | 2.83892  | -0.54714 |
|                                | O  | -2.05266 | 3.05710  | -0.06138 |                                | O  | -2.70807 | 3.01869  | 0.20099  |
|                                | C  | 4.29939  | 0.73407  | -0.45209 |                                | C  | 3.80399  | 1.13597  | -0.48686 |
|                                | C  | 5.74606  | 0.35280  | -0.78308 |                                | C  | 5.26958  | 0.90596  | -0.84771 |
|                                | C  | 5.17725  | -1.98745 | -0.71883 |                                | C  | 4.85173  | -1.50948 | -1.02103 |
|                                | C  | 3.72153  | -1.64465 | -0.38419 |                                | C  | 3.38730  | -1.27969 | -0.65846 |
|                                | H  | 5.88323  | 0.36962  | -1.87115 |                                | H  | 5.41520  | 1.05558  | -1.92504 |
|                                | H  | 6.41775  | 1.10554  | -0.36192 |                                | H  | 5.88931  | 1.63504  | -0.32110 |
|                                | H  | 4.16856  | 0.82301  | 0.62974  |                                | H  | 3.67103  | 1.10177  | 0.59656  |
|                                | H  | 4.01930  | 1.67956  | -0.92088 |                                | H  | 3.46113  | 2.10075  | -0.86395 |
|                                | H  | 5.27642  | -2.12080 | -1.80298 |                                | H  | 4.97043  | -1.54869 | -2.11126 |
|                                | H  | 5.43450  | -2.94181 | -0.25172 |                                | H  | 5.19352  | -2.45715 | -0.60475 |
|                                | H  | 3.03160  | -2.38025 | -0.80296 |                                | H  | 2.74732  | -2.01286 | -1.15177 |
|                                | N  | 6.12795  | -0.96676 | -0.29162 |                                | N  | 5.67348  | -0.44008 | -0.47908 |
|                                | H  | 6.18828  | -0.95350 | 0.72726  |                                | H  | 3.25307  | -1.35064 | 0.42276  |
|                                | H  | 3.58354  | -1.60501 | 0.69936  |                                | N  | 2.94988  | 0.07585  | -1.08034 |
|                                | N  | 3.36510  | -0.31334 | -0.93150 |                                | H  | 3.02141  | 0.13622  | -2.10907 |
|                                | H  | 3.44088  | -0.36162 | -1.95801 |                                | C  | 6.74782  | -0.69258 | 0.30568  |
|                                |    |          |          |          |                                | O  | 7.13296  | -1.81172 | 0.63323  |
|                                |    |          |          |          |                                | H  | 7.26213  | 0.22524  | 0.63690  |
| <b>2d ···4H<sub>2</sub>O-A</b> | C  | 0.42680  | -1.19137 | 0.10444  | <b>2d ···4H<sub>2</sub>O-B</b> | C  | 0.75135  | -1.19659 | 0.18592  |
|                                | C  | -0.30071 | 0.02577  | 0.05854  |                                | C  | 0.01028  | 0.00870  | 0.29122  |
|                                | C  | 0.46224  | 1.22191  | 0.06592  |                                | C  | 0.73255  | 1.21547  | 0.10419  |
|                                | C  | 1.85175  | 1.20260  | 0.11608  |                                | C  | 2.09609  | 1.21741  | -0.16871 |
|                                | C  | 2.52679  | -0.01412 | 0.15928  |                                | C  | 2.78509  | 0.01141  | -0.26414 |
|                                | C  | 1.81650  | -1.21120 | 0.15323  |                                | C  | 2.11495  | -1.19587 | -0.08732 |
|                                | H  | -0.12443 | -2.12861 | 0.10344  |                                | H  | 0.23110  | -2.14128 | 0.32629  |
|                                | H  | -0.06225 | 2.17359  | 0.02913  |                                | H  | 0.19635  | 2.15870  | 0.17773  |
|                                | H  | 2.40937  | 2.13582  | 0.12018  |                                | H  | 2.62254  | 2.15845  | -0.30706 |
|                                | H  | 2.34646  | -2.15978 | 0.18784  |                                | H  | 2.65607  | -2.13583 | -0.16161 |
|                                | Cl | 4.29014  | -0.03891 | 0.22199  |                                | Cl | 4.51554  | 0.01326  | -0.61016 |
|                                | O  | -1.61563 | 0.04588  | 0.01104  |                                | O  | -1.27761 | 0.00720  | 0.55437  |
|                                | O  | -5.66327 | -1.26308 | -0.00056 |                                | H  | -2.24985 | -1.28938 | 0.35681  |
|                                | H  | -4.72854 | -1.59404 | -0.06058 |                                | O  | -2.98775 | -1.96455 | 0.23672  |
|                                | O  | -5.68970 | 1.54022  | -0.36594 |                                | H  | -2.76923 | -2.46072 | -0.57192 |
|                                | H  | -5.70499 | 0.56825  | -0.23380 |                                | O  | -4.96939 | -0.04816 | -0.11153 |
|                                | O  | -3.03032 | 2.26429  | 0.19042  |                                | H  | -3.08340 | 2.48420  | 0.91605  |
|                                | H  | -2.44700 | 1.44663  | 0.12224  |                                | H  | -4.35908 | -0.81731 | -0.00981 |
|                                | H  | -4.76709 | 1.81580  | -0.17025 |                                | H  | -4.37791 | 0.73882  | -0.03884 |
|                                | H  | -5.98994 | -1.54990 | 0.87053  |                                | O  | -3.02710 | 1.92181  | 0.12335  |

|                               |                              |                               |                              |
|-------------------------------|------------------------------|-------------------------------|------------------------------|
|                               | H -2.92070 2.59192 1.10027   |                               | H -2.27736 1.27175 0.29568   |
|                               | O -3.08794 -2.10259 -0.15282 |                               | O -7.14331 -0.04080 1.55931  |
|                               | H -2.46780 -1.30394 -0.09350 |                               | H -6.77798 -0.09315 2.45833  |
|                               | H -2.87833 -2.54697 -0.99353 |                               | H -6.35748 -0.04363 0.95959  |
| <b>2d ..4H<sub>2</sub>O-C</b> | C -0.85208 4.93718 0.65286   | <b>2d ..4H<sub>2</sub>O-D</b> | C 0.75160 0.97218 -0.27318   |
|                               | C -1.79810 5.99443 0.70654   |                               | C 0.19885 -0.24529 0.20554   |
|                               | C -1.30482 7.26498 1.10411   |                               | C 1.12496 -1.25856 0.57034   |
|                               | C 0.03370 7.46398 1.42348    |                               | C 2.49862 -1.06977 0.46289   |
|                               | C 0.92783 6.39870 1.35678    |                               | C 2.99664 0.14027 -0.01246   |
|                               | C 0.48687 5.13552 0.97199    |                               | C 2.12483 1.16191 -0.38047   |
|                               | H -1.19344 3.94898 0.35329   |                               | H 0.07244 1.77087 -0.56252   |
|                               | H -2.00167 8.09826 1.15622   |                               | H 0.73979 -2.20433 0.94463   |
|                               | H 0.38129 8.44922 1.72418    |                               | H 3.18195 -1.86512 0.75047   |
|                               | H 1.18753 4.30582 0.92098    |                               | H 2.51697 2.10579 -0.75106   |
|                               | Cl 2.62739 6.65109 1.76115   |                               | Cl 4.74026 0.38056 -0.14889  |
|                               | O -3.06147 5.81044 0.40275   |                               | O -1.09711 -0.42121 0.30934  |
|                               | H -3.74589 4.39564 0.01061   |                               | O -3.06646 0.92628 -0.90463  |
|                               | O -4.34113 3.61305 -0.21812  |                               | H -2.26992 0.51714 -0.46329  |
|                               | H -4.09101 3.33624 -1.11737  |                               | H -3.35957 1.65780 -0.32213  |
|                               | O -6.65736 5.10567 -0.03100  |                               | O -2.36391 -2.72898 0.43349  |
|                               | H -5.55433 7.19980 1.48565   |                               | H -1.79830 -1.89620 0.41811  |
|                               | H -5.91398 4.46237 -0.13801  |                               | O -4.58075 -1.43662 -0.78233 |
|                               | H -6.21913 5.98248 -0.10824  |                               | H -4.15119 -0.55600 -0.87165 |
|                               | O -5.17249 7.42864 0.61475   |                               | H -1.91948 -3.36259 -0.15662 |
|                               | H -4.31210 6.92190 0.56435   |                               | H -3.88844 -1.99152 -0.36301 |
|                               | O -6.72723 5.99229 2.59764   |                               | O -3.93339 3.04780 0.77127   |
|                               | H -6.24456 5.41084 3.21194   |                               | H -4.35222 2.74372 1.59881   |
|                               | H -6.82387 5.47802 1.76122   |                               | H -3.21456 3.64364 1.05512   |
| <b>2e ..4H<sub>2</sub>O-A</b> | C 2.73114 -0.32099 -0.09851  | <b>2e ..4H<sub>2</sub>O-B</b> | O -2.28367 1.65718 -0.49766  |
|                               | O 3.81659 0.27026 -0.09820   |                               | H -1.51444 1.08057 -0.23708  |
|                               | C 2.68643 -1.81200 -0.35842  |                               | H -2.34490 2.34844 0.18554   |
|                               | H 3.70787 -2.17969 -0.46519  |                               | O -2.30612 -2.22514 0.13344  |
|                               | H 2.18223 -2.33677 0.45517   |                               | H -1.56272 -1.53995 0.17282  |
|                               | H 2.12178 -2.02520 -1.26909  |                               | O -4.24074 -0.33267 -0.46286 |
|                               | C 1.47493 0.40598 0.14503    |                               | H -3.63954 0.44797 -0.48926  |
|                               | C 1.48876 1.88370 0.40165    |                               | H -2.09057 -2.81580 -0.60970 |
|                               | H 2.51586 2.24381 0.46071    |                               | H -3.64409 -1.09292 -0.25773 |
|                               | H 0.96796 2.42979 -0.39116   |                               | C 2.98546 -0.03914 0.13061   |
|                               | H 0.97031 2.11381 1.33816    |                               | O 3.88580 0.80756 0.09550    |
|                               | N 0.39296 -0.32070 0.13113   |                               | C 3.33775 -1.51178 0.14855   |

|                                              |                              |                                              |                              |
|----------------------------------------------|------------------------------|----------------------------------------------|------------------------------|
|                                              | O -0.75222 0.30644 0.34643   |                                              | H 4.42383 -1.61186 0.16826   |
|                                              | O -5.06341 -0.24588 0.25295  |                                              | H 2.90072 -2.00780 1.01731   |
|                                              | H -4.18885 -0.71864 0.26340  |                                              | H 2.93749 -2.01330 -0.73555  |
|                                              | O -4.58236 2.44008 -0.45580  |                                              | C 1.57094 0.36219 0.15114    |
|                                              | H -4.77895 1.51298 -0.20109  |                                              | C 1.18849 1.81235 0.13473    |
|                                              | O -1.80875 2.75336 -0.04146  |                                              | H 2.08136 2.43661 0.16837    |
|                                              | H -1.30610 1.90598 0.10126   |                                              | H 0.61712 2.06038 -0.76566   |
|                                              | H -3.61899 2.55365 -0.30842  |                                              | H 0.54924 2.05120 0.99107    |
|                                              | H -5.44021 -0.36627 1.14247  |                                              | N 0.70644 -0.61374 0.19050   |
|                                              | H -1.58554 3.32475 0.71422   |                                              | O -0.56983 -0.27283 0.21042  |
|                                              | O -2.65300 -1.47053 0.29116  |                                              | O -5.86501 -0.65411 -2.64730 |
|                                              | H -1.89362 -0.79482 0.30613  |                                              | H -6.76517 -0.59236 -2.28630 |
|                                              | H -2.48988 -2.04707 -0.47597 |                                              | H -5.26521 -0.53929 -1.87016 |
| <b>2e ..4H<sub>2</sub>O-C</b>                | O -1.70683 2.41012 -1.20458  | <b>2e ..4H<sub>2</sub>O-D</b>                | O -2.41051 0.83588 -0.84469  |
|                                              | H -1.16891 1.64619 -0.87732  |                                              | H -1.54757 0.42237 -0.59230  |
|                                              | H -2.20001 2.72823 -0.42066  |                                              | H -2.50190 1.64291 -0.29543  |
|                                              | O -2.91680 -1.36673 -0.60177 |                                              | O -1.74632 -2.89656 0.43783  |
|                                              | H -2.01945 -0.90897 -0.48162 |                                              | H -1.12925 -2.11757 0.25655  |
|                                              | O -4.14377 0.96171 -1.40632  |                                              | O -4.04572 -1.36482 -0.18421 |
|                                              | H -3.31400 1.42120 -1.66197  |                                              | H -3.56662 -0.54248 -0.42969 |
|                                              | H -2.79181 -2.03349 -1.29990 |                                              | H -1.53246 -3.56940 -0.23178 |
|                                              | H -3.83703 0.06005 -1.13753  |                                              | H -3.32996 -1.99395 0.05187  |
|                                              | C 2.52370 -0.70904 0.93199   |                                              | C 3.11984 0.10651 0.02075    |
|                                              | O 3.60329 -0.15472 1.17122   |                                              | O 3.87063 1.07615 -0.14391   |
|                                              | C 2.36152 -2.18846 1.21337   |                                              | C 3.70581 -1.24278 0.38241   |
|                                              | H 3.28869 -2.56596 1.64680   |                                              | H 4.79002 -1.14560 0.45424   |
|                                              | H 1.52998 -2.36704 1.89794   |                                              | H 3.30129 -1.60012 1.33172   |
|                                              | H 2.13545 -2.73304 0.29386   |                                              | H 3.45006 -1.99105 -0.37089  |
|                                              | C 1.39284 0.04473 0.37363    |                                              | C 1.66540 0.24131 -0.12897   |
|                                              | C 1.52152 1.50823 0.07262    |                                              | C 1.05128 1.56299 -0.48329   |
|                                              | H 2.52413 1.85624 0.32130    |                                              | H 1.82729 2.32041 -0.59443   |
|                                              | H 1.32408 1.70829 -0.98546   |                                              | H 0.48146 1.49401 -1.41542   |
|                                              | H 0.78919 2.08975 0.64206    |                                              | H 0.34730 1.88391 0.29221    |
|                                              | N 0.30144 -0.64144 0.16908   |                                              | N 0.97043 -0.84626 0.07141   |
|                                              | O -0.72474 0.01779 -0.33488  |                                              | O -0.33743 -0.74172 -0.05693 |
|                                              | O -3.83025 2.73800 0.69851   |                                              | O -2.73149 3.16382 0.73522   |
|                                              | H -3.73587 2.30564 1.56620   |                                              | H -3.58747 3.17152 1.20462   |
|                                              | H -4.15717 2.03909 0.08322   |                                              | H -2.05943 3.28202 1.43343   |
| <b>TS1<sub>dad</sub> ..4H<sub>2</sub>O-A</b> | C 2.96920 -2.31905 0.17943   | <b>TS1<sub>dad</sub> ..4H<sub>2</sub>O-B</b> | C 2.88029 -2.35053 0.27949   |
|                                              | C 1.87804 -1.47526 0.05033   |                                              | C 1.79446 -1.52077 0.05244   |

|    |          |          |          |    |          |          |          |
|----|----------|----------|----------|----|----------|----------|----------|
| C  | 2.07273  | -0.17153 | -0.41245 | C  | 1.95615  | -0.38327 | -0.74348 |
| C  | 3.34919  | 0.29357  | -0.73431 | C  | 3.19773  | -0.07115 | -1.30110 |
| C  | 4.44369  | -0.54886 | -0.60469 | C  | 4.28815  | -0.89747 | -1.07539 |
| C  | 4.23921  | -1.84904 | -0.15266 | C  | 4.11406  | -2.03257 | -0.28814 |
| H  | 2.84369  | -3.33354 | 0.54072  | H  | 2.78042  | -3.23597 | 0.89716  |
| H  | 0.87926  | -1.79429 | 0.31427  | H  | 0.82522  | -1.72363 | 0.48727  |
| H  | 3.47663  | 1.31280  | -1.08421 | H  | 3.29356  | 0.82074  | -1.91312 |
| H  | 5.44195  | -0.20683 | -0.85303 | H  | 5.25815  | -0.67206 | -1.50364 |
| O  | 1.05536  | 0.74878  | -0.49693 | O  | 0.96156  | 0.53204  | -0.94914 |
| N  | 5.38266  | -2.73936 | -0.01815 | N  | 5.25159  | -2.90678 | -0.04702 |
| O  | 6.49939  | -2.30780 | -0.30725 | O  | 6.33776  | -2.60766 | -0.54523 |
| O  | 5.18745  | -3.88861 | 0.37885  | O  | 5.08333  | -3.91130 | 0.64555  |
| C  | -0.19587 | 0.44455  | -1.03752 | C  | -0.32996 | 0.17466  | -1.31583 |
| C  | -1.05735 | 1.66858  | -0.92958 | C  | -1.13097 | 1.43307  | -1.49481 |
| C  | -2.15886 | 1.83820  | -1.77108 | C  | -2.39449 | 1.38612  | -2.09012 |
| C  | -0.78555 | 2.65432  | 0.03049  | C  | -0.64098 | 2.66959  | -1.05358 |
| C  | -2.96525 | 2.97024  | -1.66827 | C  | -3.15133 | 2.54529  | -2.24600 |
| H  | -2.37371 | 1.07689  | -2.51295 | H  | -2.77473 | 0.43259  | -2.43947 |
| C  | -1.58631 | 3.78705  | 0.12825  | C  | -1.39491 | 3.82852  | -1.21606 |
| H  | 0.04559  | 2.52927  | 0.71527  | H  | 0.33338  | 2.72655  | -0.58322 |
| C  | -2.68147 | 3.95141  | -0.72134 | C  | -2.65512 | 3.77305  | -1.81208 |
| H  | -3.81782 | 3.08450  | -2.33298 | H  | -4.13238 | 2.48767  | -2.71092 |
| H  | -1.35713 | 4.54282  | 0.87531  | H  | -0.99603 | 4.78081  | -0.87455 |
| H  | -3.30785 | 4.83657  | -0.64321 | H  | -3.24296 | 4.67892  | -1.93804 |
| S  | -0.32170 | -0.65400 | -2.30889 | S  | -0.58470 | -1.19103 | -2.29002 |
| C  | -2.24212 | -2.26684 | 0.09240  | C  | -2.30934 | -2.11022 | 0.53067  |
| C  | -2.07313 | -0.94163 | 0.54105  | C  | -2.11095 | -0.72063 | 0.64156  |
| C  | -3.22602 | -0.22361 | 0.92068  | C  | -3.22538 | 0.08355  | 0.95116  |
| C  | -4.48743 | -0.80754 | 0.87592  | C  | -4.48191 | -0.47529 | 1.15990  |
| C  | -4.61673 | -2.12170 | 0.43461  | C  | -4.64295 | -1.85325 | 1.04622  |
| C  | -3.50279 | -2.85565 | 0.04128  | C  | -3.56580 | -2.67525 | 0.73253  |
| H  | -1.36590 | -2.83431 | -0.20391 | H  | -1.46091 | -2.74328 | 0.29395  |
| H  | -3.11583 | 0.80401  | 1.25593  | H  | -3.09128 | 1.15867  | 1.03107  |
| H  | -5.36532 | -0.24447 | 1.18091  | H  | -5.33061 | 0.15639  | 1.40748  |
| H  | -3.61656 | -3.88138 | -0.29895 | H  | -3.70416 | -3.74990 | 0.65081  |
| Cl | -6.21172 | -2.86579 | 0.38016  | Cl | -6.23085 | -2.56538 | 1.31109  |
| O  | -0.86261 | -0.38866 | 0.60877  | O  | -0.89924 | -0.18280 | 0.47209  |
| H  | 2.35244  | 4.07151  | 0.48845  | H  | 2.16335  | 4.85523  | -0.48364 |
| O  | 2.33595  | 4.33476  | 1.43693  | O  | 2.72460  | 4.07432  | -0.31848 |
| H  | 3.13930  | 4.86715  | 1.57931  | H  | 2.78008  | 3.60875  | -1.17413 |

|                                              |   |          |          |          |                                              |   |          |          |          |
|----------------------------------------------|---|----------|----------|----------|----------------------------------------------|---|----------|----------|----------|
|                                              | O | 2.31122  | 2.06924  | 3.15555  |                                              | O | 2.42578  | 2.62403  | 2.07841  |
|                                              | H | 1.44017  | 1.62884  | 3.05498  |                                              | H | 1.50156  | 2.27896  | 2.12448  |
|                                              | H | 2.29630  | 2.84468  | 2.55729  |                                              | H | 2.50195  | 3.11127  | 1.23126  |
|                                              | O | -0.19352 | 0.79899  | 2.94154  |                                              | O | -0.15865 | 1.68831  | 2.26870  |
|                                              | H | -0.44995 | 0.39163  | 2.07011  |                                              | H | -0.43831 | 1.02334  | 1.58109  |
|                                              | H | -0.92648 | 1.39366  | 3.17890  |                                              | H | -0.80293 | 2.41562  | 2.20630  |
|                                              | O | 2.29190  | 3.42706  | -1.19338 |                                              | O | 3.37689  | 3.91112  | 4.30726  |
|                                              | H | 1.64804  | 2.69580  | -1.18331 |                                              | H | 4.03758  | 3.29788  | 4.66996  |
|                                              | H | 1.96076  | 4.05937  | -1.86014 |                                              | H | 3.02079  | 3.46147  | 3.50332  |
| <b>TS1<sub>dac</sub>...4H<sub>2</sub>O-A</b> | C | 4.08769  | 0.57010  | -0.54946 | <b>TS1<sub>dac</sub>...4H<sub>2</sub>O-B</b> | C | 4.17234  | 0.07569  | -0.99122 |
|                                              | C | 2.80156  | 1.06886  | -0.69977 |                                              | C | 2.88814  | 0.50333  | -1.29571 |
|                                              | C | 1.70436  | 0.23344  | -0.48574 |                                              | C | 1.78666  | -0.16001 | -0.75471 |
|                                              | C | 1.87765  | -1.10211 | -0.11390 |                                              | C | 1.95323  | -1.25320 | 0.09947  |
|                                              | C | 3.16113  | -1.60320 | 0.03474  |                                              | C | 3.23373  | -1.68502 | 0.40521  |
|                                              | C | 4.25107  | -0.76315 | -0.18711 |                                              | C | 4.32804  | -1.01763 | -0.14429 |
|                                              | H | 4.95267  | 1.20257  | -0.71382 |                                              | H | 5.04060  | 0.57673  | -1.40382 |
|                                              | H | 2.64000  | 2.10509  | -0.97902 |                                              | H | 2.72573  | 1.35075  | -1.95513 |
|                                              | H | 1.01000  | -1.72363 | 0.06011  |                                              | H | 1.07912  | -1.73802 | 0.51469  |
|                                              | H | 3.32142  | -2.63539 | 0.32516  |                                              | H | 3.39028  | -2.52808 | 1.06872  |
|                                              | O | 0.46483  | 0.82538  | -0.57586 |                                              | O | 0.55925  | 0.38375  | -1.03040 |
|                                              | N | 5.59868  | -1.29422 | -0.03167 |                                              | N | 5.67227  | -1.47377 | 0.18102  |
|                                              | O | 5.72881  | -2.47720 | 0.28297  |                                              | O | 5.79661  | -2.44319 | 0.92970  |
|                                              | O | 6.55146  | -0.53803 | -0.22133 |                                              | O | 6.62933  | -0.87091 | -0.30552 |
|                                              | C | -0.60442 | 0.23218  | -1.24715 |                                              | C | -0.51594 | -0.37164 | -1.45352 |
|                                              | C | -1.79595 | 1.13004  | -1.11661 |                                              | C | -1.69222 | 0.52283  | -1.67320 |
|                                              | C | -2.79764 | 1.13406  | -2.09045 |                                              | C | -2.87564 | 0.00355  | -2.20779 |
|                                              | C | -1.92544 | 1.98428  | -0.01242 |                                              | C | -1.64149 | 1.88091  | -1.33537 |
|                                              | C | -3.90188 | 1.97523  | -1.96922 |                                              | C | -3.98177 | 0.82428  | -2.40806 |
|                                              | H | -2.70080 | 0.47489  | -2.94643 |                                              | H | -2.91627 | -1.04823 | -2.46559 |
|                                              | C | -3.02683 | 2.82454  | 0.10798  |                                              | C | -2.74730 | 2.70188  | -1.54053 |
|                                              | H | -1.17726 | 1.97632  | 0.77159  |                                              | H | -0.73761 | 2.29820  | -0.90831 |
|                                              | C | -4.02078 | 2.82535  | -0.87137 |                                              | C | -3.92242 | 2.17820  | -2.07829 |
|                                              | H | -4.67084 | 1.96688  | -2.73760 |                                              | H | -4.89457 | 0.40511  | -2.82409 |
|                                              | H | -3.10941 | 3.47225  | 0.97681  |                                              | H | -2.69016 | 3.75488  | -1.27630 |
|                                              | H | -4.88256 | 3.48155  | -0.77748 |                                              | H | -4.78558 | 2.81980  | -2.23771 |
|                                              | S | -0.34753 | -0.79160 | -2.54240 |                                              | S | -0.28425 | -1.80471 | -2.30268 |
|                                              | C | -3.18129 | -3.78391 | 0.58310  |                                              | C | -3.72883 | -2.84758 | 1.64256  |
|                                              | O | -3.56440 | -4.62448 | 1.40181  |                                              | O | -4.15203 | -3.34603 | 2.68850  |
|                                              | C | -3.67217 | -3.84529 | -0.84611 |                                              | C | -4.48337 | -3.04224 | 0.34664  |
|                                              | H | -4.47251 | -3.11113 | -0.98204 |                                              | H | -4.82286 | -2.08043 | -0.04480 |

|                                    |   |          |          |          |                                    |    |          |          |          |
|------------------------------------|---|----------|----------|----------|------------------------------------|----|----------|----------|----------|
|                                    | H | -2.88647 | -3.59581 | -1.55868 |                                    | H  | -3.83771 | -3.47947 | -0.41747 |
|                                    | H | -4.07429 | -4.84114 | -1.03769 |                                    | H  | -5.34041 | -3.69089 | 0.53243  |
|                                    | C | -2.26564 | -2.70036 | 0.99236  |                                    | C  | -2.48865 | -2.04437 | 1.64021  |
|                                    | N | -1.90578 | -1.88069 | 0.04911  |                                    | N  | -2.12914 | -1.58004 | 0.48212  |
|                                    | O | -1.10009 | -0.90198 | 0.38526  |                                    | O  | -1.03942 | -0.84154 | 0.45422  |
|                                    | O | -0.24159 | 0.42570  | 2.69730  |                                    | O  | -0.30636 | 1.22277  | 2.15391  |
|                                    | H | 0.70913  | 0.22127  | 2.74640  |                                    | H  | 0.51430  | 0.89844  | 2.56575  |
|                                    | H | -0.58997 | -0.09632 | 1.93636  |                                    | H  | -0.60565 | 0.49857  | 1.55050  |
|                                    | O | 0.59769  | 4.79766  | 1.80444  |                                    | O  | 1.01379  | 4.51883  | -0.77453 |
|                                    | H | 0.20545  | 5.68695  | 1.74139  |                                    | H  | 0.45855  | 4.75500  | -1.54157 |
|                                    | H | 0.69791  | 4.48376  | 0.87641  |                                    | H  | 1.64769  | 3.85692  | -1.10969 |
|                                    | C | -1.80369 | -2.60142 | 2.41577  |                                    | C  | -1.73124 | -1.81863 | 2.91522  |
|                                    | H | -2.15004 | -1.67378 | 2.88158  |                                    | H  | -1.78085 | -0.77098 | 3.22763  |
|                                    | H | -2.18027 | -3.44725 | 2.99071  |                                    | H  | -2.14166 | -2.44194 | 3.70967  |
|                                    | H | -0.71058 | -2.58866 | 2.46737  |                                    | H  | -0.67256 | -2.05718 | 2.77396  |
|                                    | O | -0.98107 | 3.06756  | 3.40098  |                                    | O  | -0.34692 | 3.93483  | 1.62253  |
|                                    | H | -0.42900 | 3.65520  | 2.84326  |                                    | H  | 0.12950  | 4.10616  | 0.78274  |
|                                    | H | -0.73809 | 2.15303  | 3.14888  |                                    | H  | -0.33966 | 2.95926  | 1.76223  |
|                                    | O | 0.88292  | 3.80344  | -0.78290 |                                    | O  | 0.30823  | 5.54297  | 3.75487  |
|                                    | H | 0.42267  | 4.31432  | -1.47638 |                                    | H  | 1.23411  | 5.33066  | 3.95915  |
|                                    | H | 0.48814  | 2.91278  | -0.80964 |                                    | H  | 0.07212  | 4.96274  | 2.99219  |
| <b>2d ··2H<sub>2</sub>O2DMSO-A</b> | H | -0.22814 | 0.32179  | -1.06798 | <b>2d ··2H<sub>2</sub>O2DMSO-B</b> | C  | 2.76932  | -0.48388 | 0.80002  |
|                                    | O | -0.37516 | 0.06099  | -2.01294 |                                    | C  | 1.73633  | 0.47171  | 0.57235  |
|                                    | H | -1.17146 | -0.50796 | -1.98313 |                                    | C  | 2.16932  | 1.76816  | 0.16561  |
|                                    | O | 0.36153  | -1.63777 | 2.16503  |                                    | C  | 3.51462  | 2.07593  | -0.00360 |
|                                    | H | 0.17041  | -0.79559 | 1.67890  |                                    | C  | 4.48625  | 1.10553  | 0.22975  |
|                                    | H | 1.23388  | -1.91876 | 1.82075  |                                    | C  | 4.11411  | -0.17489 | 0.63264  |
|                                    | S | 2.88183  | -1.82125 | -0.52132 |                                    | H  | 2.48095  | -1.48488 | 1.11334  |
|                                    | O | 2.87688  | -2.24286 | 0.95663  |                                    | H  | 1.41745  | 2.53335  | -0.01416 |
|                                    | C | 4.55871  | -2.16453 | -1.09764 |                                    | H  | 3.80914  | 3.07539  | -0.31519 |
|                                    | H | 4.68872  | -3.24771 | -1.09750 |                                    | H  | 4.87437  | -0.93072 | 0.81525  |
|                                    | H | 4.68203  | -1.77894 | -2.11203 |                                    | Cl | 6.19614  | 1.49988  | 0.01582  |
|                                    | H | 5.27282  | -1.69987 | -0.41467 |                                    | O  | 0.47816  | 0.17273  | 0.73479  |
|                                    | C | 2.97650  | -0.02045 | -0.51345 |                                    | O  | -1.38542 | 1.66090  | -0.43523 |
|                                    | H | 3.09520  | 0.33652  | -1.53898 |                                    | H  | -0.66474 | 1.11978  | 0.01130  |
|                                    | H | 2.03064  | 0.34297  | -0.10169 |                                    | H  | -2.23909 | 1.36006  | -0.05390 |
|                                    | H | 3.82154  | 0.28472  | 0.10808  |                                    | S  | -4.48581 | -0.42167 | -0.04128 |
|                                    | S | -2.41123 | -2.39928 | -0.29982 |                                    | O  | -3.82613 | 0.78897  | 0.63073  |
|                                    | O | -2.65004 | -1.61537 | -1.60110 |                                    | C  | -6.19708 | 0.07097  | -0.33747 |
|                                    | C | -3.84196 | -3.49067 | -0.14393 |                                    | H  | -6.18057 | 0.85434  | -1.09640 |

|                                    |    |          |          |          |                                    |    |          |          |          |
|------------------------------------|----|----------|----------|----------|------------------------------------|----|----------|----------|----------|
|                                    | H  | -3.77747 | -4.23121 | -0.94244 |                                    | H  | -6.76636 | -0.78558 | -0.70490 |
|                                    | H  | -3.81374 | -3.99179 | 0.82613  |                                    | H  | -6.62429 | 0.45530  | 0.59095  |
|                                    | H  | -4.75468 | -2.90085 | -0.25081 |                                    | C  | -4.79450 | -1.59965 | 1.29144  |
|                                    | C  | -2.81458 | -1.25675 | 1.03454  |                                    | H  | -5.37533 | -2.44160 | 0.90866  |
|                                    | H  | -2.74164 | -1.78121 | 1.98930  |                                    | H  | -3.82339 | -1.95200 | 1.64178  |
|                                    | H  | -2.06514 | -0.46224 | 0.99867  |                                    | H  | -5.32564 | -1.09371 | 2.10022  |
|                                    | H  | -3.82076 | -0.86335 | 0.87196  |                                    | O  | -0.75840 | 4.33974  | -0.17219 |
|                                    | C  | -0.15178 | 2.96389  | 0.30628  |                                    | H  | -1.00904 | 3.39638  | -0.31792 |
|                                    | C  | -0.14951 | 1.81427  | 1.14254  |                                    | H  | -0.59185 | 4.39052  | 0.79232  |
|                                    | C  | -0.24253 | 2.05311  | 2.54070  |                                    | S  | -1.34367 | 3.16926  | 3.21482  |
|                                    | C  | -0.33092 | 3.33931  | 3.06159  |                                    | O  | -0.37616 | 4.20763  | 2.62694  |
|                                    | C  | -0.32935 | 4.43628  | 2.20384  |                                    | C  | -1.63354 | 3.71227  | 4.91262  |
|                                    | C  | -0.23988 | 4.25025  | 0.82672  |                                    | H  | -2.18022 | 4.65507  | 4.86377  |
|                                    | H  | -0.08417 | 2.82015  | -0.76939 |                                    | H  | -2.23289 | 2.96581  | 5.43828  |
|                                    | H  | -0.24226 | 1.19760  | 3.21187  |                                    | H  | -0.67253 | 3.86013  | 5.40953  |
|                                    | H  | -0.40053 | 3.48858  | 4.13633  |                                    | C  | -0.34644 | 1.71237  | 3.57943  |
|                                    | H  | -0.23939 | 5.10918  | 0.16004  |                                    | H  | -0.95022 | 1.00529  | 4.15414  |
|                                    | Cl | -0.44122 | 6.07004  | 2.86512  |                                    | H  | -0.05215 | 1.25789  | 2.62711  |
|                                    | O  | -0.06584 | 0.60265  | 0.65162  |                                    | H  | 0.53099  | 2.02341  | 4.15109  |
| <b>2d ··2H<sub>2</sub>O2DMSO-C</b> | C  | -0.09431 | 0.26505  | -1.21930 | <b>2d ··2H<sub>2</sub>O2DMSO-D</b> | C  | -2.63091 | -1.84017 | -1.20457 |
|                                    | C  | -0.00319 | -0.47682 | -0.00802 |                                    | C  | -1.77115 | -1.17217 | -0.28665 |
|                                    | C  | 0.09060  | 0.28930  | 1.18786  |                                    | C  | -2.41713 | -0.42096 | 0.73725  |
|                                    | C  | 0.09103  | 1.67971  | 1.17403  |                                    | C  | -3.80224 | -0.35361 | 0.83851  |
|                                    | C  | 0.00173  | 2.36250  | -0.03701 |                                    | C  | -4.60056 | -1.02814 | -0.08201 |
|                                    | C  | -0.08995 | 1.65543  | -1.23387 |                                    | C  | -4.01568 | -1.77065 | -1.10502 |
|                                    | H  | -0.16825 | -0.28332 | -2.15504 |                                    | H  | -2.17577 | -2.42224 | -2.00281 |
|                                    | H  | 0.16268  | -0.24008 | 2.13461  |                                    | H  | -1.79968 | 0.11305  | 1.45613  |
|                                    | H  | 0.16289  | 2.23382  | 2.10679  |                                    | H  | -4.26232 | 0.22828  | 1.63368  |
|                                    | H  | -0.15991 | 2.19064  | -2.17775 |                                    | H  | -4.64127 | -2.29517 | -1.82335 |
|                                    | Cl | 0.00476  | 4.12654  | -0.05503 |                                    | Cl | -6.36088 | -0.94031 | 0.04685  |
|                                    | O  | -0.00551 | -1.78359 | 0.00530  |                                    | O  | -0.47152 | -1.24013 | -0.38697 |
|                                    | H  | -1.08286 | -2.52053 | -1.15519 |                                    | O  | 1.02002  | -0.81923 | 1.77954  |
|                                    | O  | -1.76700 | -2.91546 | -1.75416 |                                    | H  | 0.41520  | -0.95167 | 0.98832  |
|                                    | H  | -2.56834 | -2.37530 | -1.59514 |                                    | H  | 1.92709  | -0.86574 | 1.40776  |
|                                    | O  | 1.75250  | -2.88490 | 1.78766  |                                    | S  | 3.40165  | -2.23043 | -0.57902 |
|                                    | H  | 1.06970  | -2.50001 | 1.18070  |                                    | O  | 3.48678  | -1.08463 | 0.44178  |
|                                    | H  | 2.55539  | -2.35016 | 1.61859  |                                    | C  | 5.00558  | -2.23577 | -1.40707 |
|                                    | S  | 3.97959  | -0.80338 | -0.30720 |                                    | H  | 5.75082  | -2.54359 | -0.67233 |
|                                    | O  | 4.00019  | -1.25755 | 1.15843  |                                    | H  | 4.98652  | -2.94903 | -2.23391 |
|                                    | C  | 5.71354  | -0.75239 | -0.81011 |                                    | H  | 5.22428  | -1.22800 | -1.76593 |

|   |          |          |          |   |          |          |          |
|---|----------|----------|----------|---|----------|----------|----------|
| H | 6.07846  | -1.78040 | -0.82148 | C | 2.40785  | -1.59462 | -1.94358 |
| H | 5.79187  | -0.32290 | -1.81123 | H | 2.42202  | -2.31743 | -2.76333 |
| H | 6.27861  | -0.16097 | -0.08675 | H | 1.38616  | -1.46980 | -1.57069 |
| C | 3.68134  | 0.97546  | -0.26471 | H | 2.82854  | -0.63916 | -2.26581 |
| H | 3.78289  | 1.38334  | -1.27277 | O | 0.25524  | 1.56063  | 2.97016  |
| H | 2.66028  | 1.12311  | 0.08867  | H | 0.55068  | 0.69556  | 2.59992  |
| H | 4.39556  | 1.44018  | 0.41869  | H | 0.19946  | 2.14661  | 2.18621  |
| S | -3.98608 | -0.78464 | 0.29961  | S | 1.19762  | 2.60937  | -0.44530 |
| O | -4.00918 | -1.26932 | -1.15617 | O | 0.16233  | 3.07258  | 0.59055  |
| C | -5.71949 | -0.71756 | 0.80244  | C | 1.58390  | 4.08684  | -1.40952 |
| H | -6.08769 | -1.74392 | 0.83564  | H | 2.09001  | 4.78635  | -0.74269 |
| H | -5.79573 | -0.26690 | 1.79438  | H | 2.24603  | 3.82165  | -2.23655 |
| H | -6.28321 | -0.13965 | 0.06720  | H | 0.65493  | 4.52544  | -1.77963 |
| C | -3.68221 | 0.99196  | 0.21968  | C | 0.26670  | 1.71650  | -1.70513 |
| H | -3.78165 | 1.42115  | 1.21907  | H | 0.91486  | 1.53564  | -2.56643 |
| H | -2.66095 | 1.12891  | -0.13739 | H | -0.04795 | 0.76253  | -1.26950 |
| H | -4.39547 | 1.44458  | -0.47277 | H | -0.59619 | 2.32137  | -1.99390 |

**S13** The energy, enthalpy, free energy (au) and entropy ( $\text{cal}\cdot\text{mol}^{-1}\cdot\text{K}^{-1}$ ) for the studied reactions in **Table 1**, **Fig.1** and **Fig.4**, obtained with CAM-B3LYP+IDSCRF/DZVP.

| species                  | E           | H           | G(gas)      | G(sol)      | G <sub>qRRHO(l)</sub> | S(gas) | S(sol) | S <sub>qRRHO(l)</sub> |
|--------------------------|-------------|-------------|-------------|-------------|-----------------------|--------|--------|-----------------------|
| MeOH 313.15K             |             |             |             |             |                       |        |        |                       |
| <b>1a</b>                | -2810.14187 | -2809.94840 | -2809.99857 | -2809.98742 | -2809.98602           | 100.5  | 78.2   | 75.4                  |
| <b>2a</b>                | -265.42555  | -265.31856  | -265.35613  | -265.34460  | -265.34421            | 75.3   | 52.2   | 51.4                  |
| <b>TS<sub>aa</sub></b>   | -3075.53829 | -3075.23689 | -3075.30773 | -3075.29679 | -3075.29021           | 142.0  | 120.0  | 106.95                |
|                          | 18.28       | 18.87       | 29.47       | 22.11       | 25.09                 | -33.9  | -10.3  | -19.8                 |
| <b>P<sub>aa</sub></b>    | -3075.60385 | -3075.29896 | -3075.36872 | -3075.35793 | -3075.35320           | 139.8  | 118.2  | 108.7                 |
|                          | -22.86      | -20.08      | -8.80       | -16.26      | -14.41                | -36.0  | -12.2  | -18.1                 |
| MeOH 273.15K             |             |             |             |             |                       |        |        |                       |
| <b>1ba</b>               | -1100.63122 | -1100.52439 | -1100.56845 | -1100.55691 | -1100.55578           | 101.2  | 74.7   | 72.1                  |
| <b>2b</b>                | -251.78621  | -251.61957  | -251.65089  | -251.64053  | -251.64053            | 72.0   | 48.1   | 48.1                  |
| <b>TS1<sub>bab</sub></b> | -1352.40652 | -1352.13176 | -1352.18732 | -1352.17646 | -1352.17434           | 127.6  | 102.7  | 97.8                  |
|                          | 6.85        | 7.66        | 20.09       | 13.17       | 13.79                 | -45.5  | -20.2  | -22.4                 |
| <b>IN1<sub>bab</sub></b> | -1352.44935 | -1352.17145 | -1352.22807 | -1352.21700 | -1352.21479           | 130.1  | 104.6  | 99.6                  |
|                          | -20.03      | -17.25      | -5.48       | -12.27      | -11.6                 | -43.1  | -18.2  | -20.7                 |
| <b>TS2<sub>bab</sub></b> | -1604.23719 | -1603.79389 | -1603.86553 | -1603.85511 | -1603.85025           | 164.6  | 140.6  | 129.5                 |
|                          | -21.05      | -19.05      | 2.91        | -10.79      | -8.42                 | -80.6  | -30.3  | -38.8                 |
| <b>P<sub>bab</sub></b>   | -1604.25726 | -1603.80887 | -1603.88331 | -1603.87299 | -1603.86726           | 171.0  | 147.3  | 134.1                 |
|                          | -33.65      | -28.45      | -8.21       | -21.97      | -19.09                | -74.1  | -23.7  | -34.3                 |



| MeOH 273.15K                     |             |             |             |             |             |       |       |       |
|----------------------------------|-------------|-------------|-------------|-------------|-------------|-------|-------|-------|
| <b>1ba</b>                       | -1100.63122 | -1100.52439 | -1100.56845 | -1100.55691 | -1100.55578 | 101.2 | 74.7  | 72.1  |
| <b>2b</b> ··MeOH                 | -367.49212  | -367.26734  | -367.31083  | -367.30118  | -367.29909  | 99.9  | 77.7  | 72.9  |
| <b>TS1<sub>bab</sub></b> ··MeOH  | -1468.10400 | -1467.77163 | -1467.83840 | -1467.82807 | -1467.82416 | 153.4 | 129.7 | 120.7 |
|                                  | 12.14       | 12.61       | 25.65       | 18.84       | 19.27       | -47.8 | -22.8 | -24.4 |
| MeOH 273.15K                     |             |             |             |             |             |       |       |       |
| <b>1ba</b>                       | -1100.63122 | -1100.52439 | -1100.56845 | -1100.55691 | -1100.55578 | 101.2 | 74.7  | 72.1  |
| <b>2b</b> ··2MeOH                | -483.18996  | -482.90768  | -482.96445  | -482.95516  | -482.95052  | 130.4 | 109.1 | 98.4  |
| <b>TS1<sub>bab</sub></b> ··2MeOH | -1583.80412 | -1583.41399 | -1583.49108 | -1583.48122 | -1583.47586 | 177.1 | 154.4 | 142.1 |
|                                  | 10.71       | 11.35       | 26.24       | 19.36       | 19.10       | -54.5 | -29.3 | -28.4 |
| MeOH 273.15K                     |             |             |             |             |             |       |       |       |
| <b>1bb</b>                       | -3214.25377 | -3214.14734 | -3214.19272 | -3214.18125 | -3214.17996 | 104.2 | 77.9  | 74.9  |
| <b>2b</b> ··2MeOH                | -483.18996  | -482.90768  | -482.96445  | -482.95516  | -482.95052  | 130.4 | 109.1 | 98.4  |
| <b>TS<sub>bbb</sub></b> ··2MeOH  | -3697.42600 | -3697.03624 | -3697.11464 | -3697.10480 | -3697.09921 | 180.1 | 157.5 | 144.7 |
|                                  | 11.13       | 11.78       | 26.69       | 19.84       | 19.62       | -54.6 | -29.5 | -28.7 |
| MeOH 273.15K                     |             |             |             |             |             |       |       |       |
| <b>1bc</b>                       | -1420.52205 | -1420.30816 | -1420.36657 | -1420.35528 | -1420.35215 | 134.2 | 108.2 | 101.0 |
| <b>2b</b> ··2MeOH                | -483.18996  | -482.90768  | -482.96445  | -482.95516  | -482.95052  | 130.4 | 109.1 | 98.4  |
| <b>TS<sub>bcb</sub></b> ··2MeOH  | -1903.69817 | -1903.20074 | -1903.29104 | -1903.28121 | -1903.27388 | 207.4 | 184.9 | 168.0 |
|                                  | 8.68        | 9.48        | 25.09       | 18.34       | 18.07       | -57.1 | -32.4 | -31.4 |
| MeOH 273.15K                     |             |             |             |             |             |       |       |       |
| <b>1bd</b>                       | -740.31207  | -740.20407  | -740.24720  | -740.23542  | -740.23427  | 99.1  | 72.0  | 69.4  |
| <b>2b</b> ··2MeOH                | -483.18996  | -482.90768  | -482.96445  | -482.95516  | -482.95052  | 130.4 | 109.1 | 98.4  |
| <b>TS<sub>bdb</sub></b> ··2MeOH  | -1223.49116 | -1223.09999 | -1223.17774 | -1223.16802 | -1223.16185 | 178.6 | 156.3 | 142.1 |
|                                  | 6.82        | 7.38        | 21.28       | 14.16       | 14.40       | -50.9 | -24.8 | -25.7 |
| MeOH 273.15K                     |             |             |             |             |             |       |       |       |
| <b>1be</b>                       | -845.53202  | -845.41199  | -845.45996  | -845.44768  | -845.44569  | 110.2 | 82.0  | 77.4  |
| <b>2b</b> ··2MeOH                | -483.18996  | -482.90768  | -482.96445  | -482.95516  | -482.95052  | 130.4 | 109.1 | 98.4  |
| <b>TS<sub>beb</sub></b> ··2MeOH  | -1328.71112 | -1328.30774 | -1328.38803 | -1328.37807 | -1328.37201 | 184.5 | 161.6 | 147.7 |
|                                  | 6.81        | 7.49        | 22.83       | 15.54       | 15.19       | -56.2 | -29.5 | -28.2 |
| MeOH 293.15K                     |             |             |             |             |             |       |       |       |
| <b>1ca</b>                       | -1216.92221 | -1216.85301 | -1216.89432 | -1216.88236 | -1216.88202 | 88.4  | 62.8  | 62.1  |
| <b>2b</b> ··2MeOH                | -483.18996  | -482.90612  | -482.96867  | -482.95863  | -482.95328  | 133.9 | 112.4 | 101.0 |
| <b>TS<sub>cab</sub></b> ··2MeOH  | -1700.08705 | -1699.73339 | -1699.81637 | -1699.80594 | -1699.79831 | 177.6 | 155.3 | 139.0 |
|                                  | 15.76       | 16.15       | 29.25       | 21.99       | 23.21       | -44.7 | -19.9 | -24.1 |
| MeOH 293.15K                     |             |             |             |             |             |       |       |       |
| <b>1cb</b>                       | -3330.54585 | -3330.47699 | -3330.51960 | -3330.50753 | -3330.50711 | 91.2  | 65.4  | 64.5  |
| <b>2b</b> ··2MeOH                | -483.18996  | -482.90612  | -482.96867  | -482.95863  | -482.95328  | 133.9 | 112.4 | 101.0 |
| <b>TS<sub>cab</sub></b> ··2MeOH  | -3813.70926 | -3813.35590 | -3813.43935 | -3813.42874 | -3813.42137 | 178.6 | 155.9 | 140.1 |

|                                         |             |             |             |             |             |       |       |       |
|-----------------------------------------|-------------|-------------|-------------|-------------|-------------|-------|-------|-------|
|                                         | 16.66       | 17.07       | 30.70       | 23.48       | 24.49       | -46.5 | -21.9 | -25.3 |
| MeOH 293.15K                            |             |             |             |             |             |       |       |       |
| <b>1cc</b>                              | -1267.97949 | -1267.80591 | -1267.86580 | -1267.85366 | -1267.85022 | 128.2 | 102.2 | 94.9  |
| <b>2b</b> ··2MeOH                       | -483.18996  | -482.90612  | -482.96867  | -482.95863  | -482.95328  | 133.9 | 112.4 | 101.0 |
| <b>TS<sub>ccb</sub></b> ··2MeOH         | -1751.14804 | -1750.69004 | -1750.79005 | -1750.77951 | -1750.76905 | 214.1 | 191.5 | 169.1 |
|                                         | 13.43       | 13.80       | 27.87       | 20.57       | 21.62       | -48.0 | -23.1 | -26.7 |
| MeOH 293.15K                            |             |             |             |             |             |       |       |       |
| <b>1cd</b>                              | -1216.91997 | -1216.85080 | -1216.89264 | -1216.88059 | -1216.87979 | 89.6  | 63.8  | 62.1  |
| <b>2b</b> ··2MeOH                       | -483.18996  | -482.90612  | -482.96867  | -482.95863  | -482.95328  | 133.9 | 112.4 | 101.0 |
| <b>TS<sub>ceb</sub></b> ··2MeOH         | -1700.08693 | -1699.73308 | -1699.81541 | -1699.80478 | -1699.79747 | 176.2 | 153.5 | 137.8 |
|                                         | 14.43       | 14.96       | 28.80       | 21.61       | 22.34       | -47.2 | -22.7 | -25.2 |
| MeOH 293.15K                            |             |             |             |             |             |       |       |       |
| <b>1ce</b>                              | -3330.54357 | -3330.47477 | -3330.51786 | -3330.50562 | -3330.50480 | 92.3  | 66.0  | 64.3  |
| <b>2b</b> ··2MeOH                       | -483.18996  | -482.90612  | -482.96867  | -482.95863  | -482.95328  | 133.9 | 112.4 | 101.0 |
| <b>TS<sub>ceb</sub></b> ··2MeOH         | -3813.70925 | -3813.35571 | -3813.43755 | -3813.42694 | -3813.42043 | 175.2 | 152.5 | 138.5 |
|                                         | 15.24       | 15.80       | 30.74       | 23.41       | 23.63       | -51.0 | -26.0 | -26.7 |
| MeOH 293.15K                            |             |             |             |             |             |       |       |       |
| <b>1cf</b>                              | -1536.81515 | -1536.63809 | -1536.69546 | -1536.68325 | -1536.68077 | 122.8 | 96.7  | 91.4  |
| <b>2b</b> ··2MeOH                       | -483.18996  | -482.90612  | -482.96867  | -482.95863  | -482.95328  | 133.9 | 112.4 | 101.0 |
| <b>TS<sub>cfb</sub></b> ··2MeOH         | -2019.98412 | -2019.52228 | -2019.61559 | -2019.60483 | -2019.59776 | 199.7 | 176.7 | 161.6 |
|                                         | 13.17       | 13.76       | 30.46       | 23.25       | 22.77       | -56.9 | -32.4 | -30.7 |
| MeOH 293.15K                            |             |             |             |             |             |       |       |       |
| <b>1cg</b>                              | -1267.97855 | -1267.80494 | -1267.86404 | -1267.85183 | -1267.84863 | 126.5 | 100.4 | 93.5  |
| <b>2b</b> ··2MeOH                       | -483.18996  | -482.90612  | -482.96867  | -482.95863  | -482.95328  | 133.9 | 112.4 | 101.0 |
| <b>TS<sub>cgb</sub></b> ··2MeOH         | -1751.14960 | -1750.69117 | -1750.78870 | -1750.77813 | -1750.76886 | 208.8 | 186.2 | 166.3 |
|                                         | 11.87       | 12.48       | 27.62       | 20.29       | 20.74       | -51.6 | -26.6 | -28.2 |
| H <sub>2</sub> O 298.15K                |             |             |             |             |             |       |       |       |
| <b>1da</b>                              | -1178.99029 | -1178.77743 | -1178.83905 | -1178.82697 | -1178.82290 | 129.7 | 104.3 | 95.7  |
| <b>2d</b>                               | -766.43561  | -766.34566  | -766.38408  | -766.37134  | -766.37126  | 80.9  | 54.1  | 53.9  |
| <b>TS<sub>1dad</sub></b>                | -1945.42021 | -1945.11647 | -1945.19449 | -1945.18235 | -1945.17655 | 164.2 | 138.7 | 126.5 |
|                                         | 3.57        | 4.15        | 17.97       | 10.02       | 11.05       | -46.4 | -19.7 | -23.1 |
| <b>IN<sub>1dad</sub></b>                | -1945.43368 | -1945.12807 | -1945.20578 | -1945.19386 | -1945.18810 | 163.5 | 138.5 | 126.3 |
|                                         | -4.88       | -3.12       | 10.89       | 2.79        | 3.80        | -47.0 | -19.9 | -23.2 |
| <b>TS<sub>2dad</sub></b>                | -1945.42842 | -1945.12457 | -1945.20265 | -1945.19071 | -1945.18482 | 164.3 | 139.2 | 126.8 |
|                                         | -1.58       | -0.93       | 12.85       | 4.77        | 5.86        | -46.2 | -19.1 | -22.8 |
| <b>P<sub>dad</sub></b>                  | -1945.42842 | -1945.12457 | -1945.20265 | -1945.19071 | -1945.18482 | 164.3 | 139.2 | 126.8 |
| <b>4-NO<sub>2</sub>-PhO<sup>·</sup></b> | -511.37144  | -511.26766  | -511.30914  | -511.29568  | -511.29527  | 87.3  | 59.0  | 58.1  |
|                                         | -13.97      | -13.83      | -13.4       | -13.22      | -13.52      | -1.4  | -2.0  | -1.1  |
| H <sub>2</sub> O 298.15K                |             |             |             |             |             |       |       |       |

|                                                |             |             |             |             |             |       |       |       |
|------------------------------------------------|-------------|-------------|-------------|-------------|-------------|-------|-------|-------|
| <b>1da</b>                                     | -1178.99029 | -1178.77743 | -1178.83905 | -1178.82697 | -1178.82290 | 129.7 | 104.3 | 95.7  |
| <b>2d</b> ··H <sub>2</sub> O                   | -842.86858  | -842.75134  | -842.79825  | -842.78582  | -842.78432  | 98.7  | 72.6  | 69.4  |
| <b>TS1<sub>dad</sub></b> ··H <sub>2</sub> O    | -2021.84956 | -2021.51839 | -2021.60535 | -2021.59319 | -2021.58546 | 183.0 | 157.4 | 141.2 |
|                                                | 5.84        | 6.51        | 20.05       | 12.30       | 13.65       | -45.4 | -19.4 | -24.0 |
| H <sub>2</sub> O 298.15K                       |             |             |             |             |             |       |       |       |
| <b>1da</b>                                     | -1178.99029 | -1178.77743 | -1178.83905 | -1178.82697 | -1178.82290 | 129.7 | 104.3 | 95.7  |
| <b>2d</b> ··2H <sub>2</sub> O                  | -919.30017  | -919.15549  | -919.21171  | -919.19936  | -919.19606  | 118.3 | 92.3  | 85.4  |
| <b>TS1<sub>dad</sub></b> ··2H <sub>2</sub> O   | -2098.27536 | -2097.91665 | -2098.01010 | -2097.99824 | -2097.98988 | 196.7 | 171.7 | 154.1 |
|                                                | 9.48        | 10.21       | 25.51       | 17.63       | 18.25       | -51.3 | -24.9 | -27.0 |
| H <sub>2</sub> O 298.15K                       |             |             |             |             |             |       |       |       |
| <b>1da</b>                                     | -1178.99029 | -1178.77743 | -1178.83905 | -1178.82697 | -1178.82290 | 129.7 | 104.3 | 95.7  |
| <b>2d</b> ··4H <sub>2</sub> O-A                | -1072.16638 | -1071.96624 | -1072.03459 | -1072.02209 | -1072.01651 | 143.8 | 117.5 | 105.8 |
| <b>TS1<sub>dad</sub></b> ··4H <sub>2</sub> O-A | -2251.13177 | -2250.71745 | -2250.82302 | -2250.81118 | -2250.80217 | 222.2 | 197.3 | 178.3 |
|                                                | 15.62       | 16.45       | 31.76       | 23.77       | 23.37       | -51.3 | -24.6 | -23.2 |
| <b>2d</b> ··4H <sub>2</sub> O-B                | -1072.16518 | -1071.96495 | -1072.03430 | -1072.02198 | -1072.01593 | 146.0 | 120.0 | 107.3 |
| <b>TS1<sub>dad</sub></b> ··4H <sub>2</sub> O-B | -2251.13208 | -2250.71845 | -2250.82874 | -2250.81670 | -2250.80584 | 232.1 | 206.8 | 184.0 |
|                                                | 14.68       | 15.02       | 27.99       | 20.24       | 20.70       | -43.5 | -17.5 | -19.0 |
| <b>2d</b> ··4H <sub>2</sub> O-C                | -1072.16416 | -1071.96305 | -1072.02962 | -1072.01709 | -1072.01222 | 140.1 | 113.7 | 103.5 |
| <b>2d</b> ··4H <sub>2</sub> O-D                | -1072.16110 | -1071.96076 | -1072.03308 | -1072.02083 | -1072.01376 | 152.2 | 126.4 | 111.5 |
| H <sub>2</sub> O 298.15K                       |             |             |             |             |             |       |       |       |
| <b>1da</b>                                     | -1178.99029 | -1178.77743 | -1178.83905 | -1178.82697 | -1178.82290 | 129.7 | 104.3 | 95.7  |
| <b>2d</b> ··3H <sub>2</sub> O                  | -995.73538  | -995.56254  | -995.62214  | -995.60943  | -995.60584  | 125.4 | 98.7  | 91.1  |
| <b>TS1<sub>dad</sub></b> ··3H <sub>2</sub> O   | -2174.70494 | -2174.31887 | -2174.41915 | -2174.40693 | -2174.39869 | 211.1 | 185.3 | 168.0 |
|                                                | 13.01       | 13.24       | 26.38       | 18.49       | 18.86       | -44.1 | -17.6 | -18.8 |
| H <sub>2</sub> O 298.15K                       |             |             |             |             |             |       |       |       |
| <b>1da</b>                                     | -1178.99029 | -1178.77743 | -1178.83905 | -1178.82697 | -1178.82290 | 129.7 | 104.3 | 95.7  |
| <b>2e</b>                                      | -361.20364  | -361.09628  | -361.13758  | -361.12673  | -361.12606  | 86.9  | 64.1  | 62.7  |
| <b>TS1<sub>dae</sub></b>                       | -1540.19251 | -1539.87141 | -1539.95358 | -1539.94239 | -1539.93557 | 172.9 | 149.4 | 135.0 |
|                                                | 0.89        | 1.44        | 14.46       | 7.10        | 8.4         | -43.7 | -19.0 | -23.3 |
| <b>IN1<sub>dae</sub></b>                       | -1540.20903 | -1539.88619 | -1539.96640 | -1539.95541 | -1539.94966 | 168.8 | 145.7 | 133.6 |
|                                                | -9.48       | -7.83       | 6.42        | -1.07       | -0.44       | -47.8 | -22.7 | -24.8 |
| <b>TS2<sub>dae</sub></b>                       | -1540.19636 | -1539.87554 | -1539.95740 | -1539.94639 | -1539.93973 | 172.3 | 149.1 | 135.1 |
|                                                | -1.52       | -1.15       | 12.07       | 4.59        | 5.79        | -44.3 | -19.2 | -23.3 |
| <b>P<sub>dae</sub></b>                         | -1540.19636 | -1539.87554 | -1539.95740 | -1539.94639 | -1539.93973 | 172.3 | 149.1 | 135.1 |
| <b>4-NO<sub>2</sub>-PhO<sup>·</sup></b>        | -511.37144  | -511.26766  | -511.30914  | -511.29568  | -511.29527  | 87.3  | 59.0  | 58.1  |
|                                                | -12.91      | -13.03      | 12.68       | 11.96       | 12.48       | -1.1  | -3.4  | -1.9  |
| H <sub>2</sub> O 298.15K                       |             |             |             |             |             |       |       |       |
| <b>1da</b>                                     | -1178.99029 | -1178.77743 | -1178.83905 | -1178.82697 | -1178.82290 | 129.7 | 104.3 | 95.7  |
| <b>2e</b> ··H <sub>2</sub> O                   | -437.63419  | -437.49939  | -437.54930  | -437.53816  | -437.53606  | 105.1 | 81.6  | 77.2  |

|                                                |             |             |             |             |             |       |       |       |
|------------------------------------------------|-------------|-------------|-------------|-------------|-------------|-------|-------|-------|
| <b>TS1<sub>dae</sub>··H<sub>2</sub>O</b>       | -1616.62089 | -1616.27232 | -1616.36147 | -1616.35040 | -1616.34272 | 187.6 | 164.3 | 148.2 |
|                                                | 2.25        | 2.82        | 16.87       | 9.24        | 10.19       | -47.1 | -21.5 | -24.7 |
| H <sub>2</sub> O 298.15K                       |             |             |             |             |             |       |       |       |
| <b>1da</b>                                     | -1178.99029 | -1178.77743 | -1178.83905 | -1178.82697 | -1178.82290 | 129.7 | 104.3 | 95.7  |
| <b>2e</b> ··2H <sub>2</sub> O                  | -514.06546  | -513.90275  | -513.95937  | -513.94842  | -513.94544  | 119.2 | 96.1  | 89.8  |
| <b>TS1<sub>dae</sub>··2H<sub>2</sub>O</b>      | -1693.04599 | -1692.66990 | -1692.76781 | -1692.75667 | -1692.74719 | 206.1 | 182.6 | 162.7 |
|                                                | 6.12        | 6.45        | 19.21       | 11.75       | 13.27       | -42.8 | -17.8 | -22.9 |
| H <sub>2</sub> O 298.15K                       |             |             |             |             |             |       |       |       |
| <b>1da</b>                                     | -1178.99029 | -1178.77743 | -1178.83905 | -1178.82697 | -1178.82290 | 129.7 | 104.3 | 95.7  |
| <b>2e</b> ··4H <sub>2</sub> O-A                | -666.93202  | -666.71445  | -666.78519  | -666.77404  | -666.76839  | 148.9 | 125.4 | 113.5 |
| <b>TS1<sub>dae</sub>··4H<sub>2</sub>O-A</b>    | -1845.90155 | -1845.46979 | -1845.57836 | -1845.56716 | -1845.55802 | 228.5 | 204.9 | 185.7 |
|                                                | 13.03       | 13.86       | 28.79       | 21.24       | 21.54       | -50.1 | -24.8 | -23.6 |
| <b>2e</b> ··4H <sub>2</sub> O-B                | -666.93104  | -666.71332  | -666.78666  | -666.77553  | -666.76861  | 154.4 | 130.9 | 116.4 |
| <b>TS1<sub>dae</sub>··4H<sub>2</sub>O-B</b>    | -1845.90150 | -1845.47061 | -1845.58522 | -1845.57398 | -1845.56218 | 241.2 | 217.6 | 192.7 |
|                                                | 12.44       | 12.64       | 25.41       | 17.90       | 18.41       | -42.8 | -17.6 | -19.3 |
| <b>2e</b> ··4H <sub>2</sub> O-C                | -666.93034  | -666.71181  | -666.77993  | -666.76877  | -666.76416  | 143.4 | 119.9 | 110.2 |
| <b>2e</b> ··4H <sub>2</sub> O-D                | -666.92738  | -666.70957  | -666.78257  | -666.77128  | -666.76487  | 153.6 | 129.9 | 116.4 |
| H <sub>2</sub> O 298.15K                       |             |             |             |             |             |       |       |       |
| <b>1da</b>                                     | -1178.99029 | -1178.77743 | -1178.83905 | -1178.82697 | -1178.82290 | 129.7 | 104.3 | 95.7  |
| <b>2e</b> ··3H <sub>2</sub> O                  | -590.50131  | -590.31097  | -590.37325  | -590.36212  | -590.35828  | 131.1 | 107.7 | 99.6  |
| <b>TS1<sub>dae</sub>··3H<sub>2</sub>O</b>      | -1769.47475 | -1769.07138 | -1769.17726 | -1769.16629 | -1769.1564  | 222.8 | 199.8 | 178.9 |
|                                                | 10.57       | 10.68       | 21.99       | 14.31       | 15.55       | -37.9 | -12.2 | -16.4 |
| H <sub>2</sub> O 298.15K                       |             |             |             |             |             |       |       |       |
| <b>1db</b>                                     | -664.43744  | -664.27907  | -664.33218  | -664.32083  | -664.31797  | 111.8 | 87.9  | 81.9  |
| <b>2d</b> ··3H <sub>2</sub> O                  | -995.73538  | -995.56254  | -995.62214  | -995.60943  | -995.60584  | 125.4 | 98.7  | 91.1  |
| <b>TS1<sub>abd</sub>··3H<sub>2</sub>O</b>      | -1660.15672 | -1659.82434 | -1659.91437 | -1659.90262 | -1659.89576 | 189.5 | 164.7 | 150.5 |
|                                                | 10.10       | 10.84       | 25.07       | 17.34       | 17.55       | -47.7 | -21.8 | -22.5 |
| H <sub>2</sub> O 298.15K                       |             |             |             |             |             |       |       |       |
| <b>1db</b>                                     | -664.43744  | -664.27907  | -664.33218  | -664.32083  | -664.31797  | 111.8 | 87.9  | 81.9  |
| <b>2e</b> ··3H <sub>2</sub> O                  | -590.50131  | -590.31097  | -590.37325  | -590.36212  | -590.35828  | 131.1 | 107.7 | 99.6  |
| <b>TS1<sub>dbe</sub>··3H<sub>2</sub>O</b>      | -1254.92856 | -1254.57877 | -1254.67154 | -1254.66053 | -1254.65255 | 195.2 | 172.1 | 155.3 |
|                                                | 6.39        | 7.07        | 21.27       | 14.07       | 14.87       | -47.6 | -23.5 | -26.2 |
| H <sub>2</sub> O 298.15K                       |             |             |             |             |             |       |       |       |
| <b>1da</b>                                     | -1178.99029 | -1178.77743 | -1178.83905 | -1178.82697 | -1178.82290 | 129.7 | 104.3 | 95.7  |
| <b>2d</b> ··3H <sub>2</sub> O1DMSO             | -1548.85292 | -1548.59000 | -1548.66977 | -1548.65886 | -1548.65157 | 167.9 | 144.9 | 129.6 |
| <b>TS1<sub>dad</sub>··3H<sub>2</sub>O1DMSO</b> | -2727.82688 | -2727.35090 | -2727.47082 | -2727.45958 | -2727.44688 | 252.4 | 228.7 | 202.0 |
|                                                | 10.25       | 10.37       | 23.85       | 16.47       | 17.32       | -45.2 | -20.4 | -23.3 |
| H <sub>2</sub> O 298.15K                       |             |             |             |             |             |       |       |       |
| <b>1da</b>                                     | -1178.99029 | -1178.77743 | -1178.83905 | -1178.82697 | -1178.82290 | 129.7 | 104.3 | 95.7  |

|                                                   |             |             |             |             |             |       |       |       |
|---------------------------------------------------|-------------|-------------|-------------|-------------|-------------|-------|-------|-------|
| <b>2d</b> ··2H <sub>2</sub> O1DMSO                | -1472.42354 | -1472.18788 | -1472.25856 | -1472.24747 | -1472.24219 | 148.8 | 125.4 | 114.3 |
| <b>TS1<sub>dad</sub></b> ··2H <sub>2</sub> O1DMSO | -2651.39696 | -2650.94841 | -2651.05973 | -2651.04854 | -2651.03766 | 234.3 | 210.7 | 187.8 |
|                                                   | 10.59       | 10.60       | 23.77       | 16.25       | 17.22       | -44.2 | -19.0 | -22.2 |
| DMSO 298.15K                                      |             |             |             |             |             |       |       |       |
| <b>1da</b>                                        | -1178.99011 | -1178.77724 | -1178.83884 | -1178.82681 | -1178.82274 | 129.6 | 104.3 | 95.8  |
| <b>2d</b> ··2H <sub>2</sub> O1DMSO                | -1472.42260 | -1472.18692 | -1472.25757 | -1472.24644 | -1472.24119 | 148.7 | 125.3 | 114.2 |
| <b>TS1<sub>dad</sub></b> ··2H <sub>2</sub> O1DMSO | -2651.39593 | -2650.94734 | -2651.05862 | -2651.04732 | -2651.03641 | 234.2 | 210.4 | 187.5 |
|                                                   | 10.53       | 10.55       | 23.71       | 16.27       | 17.27       | -44.1 | -19.2 | -22.5 |
| H <sub>2</sub> O 298.15K                          |             |             |             |             |             |       |       |       |
| <b>1da</b>                                        | -1178.99029 | -1178.77743 | -1178.83905 | -1178.82697 | -1178.82290 | 129.7 | 104.3 | 95.7  |
| <b>2d</b> ··2H <sub>2</sub> O2DMSO                | -2025.53882 | -2025.21402 | -2025.30401 | -2025.29352 | -2025.28476 | 189.4 | 167.3 | 148.9 |
| <b>TS1<sub>dad</sub></b> ··2H <sub>2</sub> O2DMSO | -3204.51931 | -3203.98052 | -3204.10836 | -3204.09774 | -3204.08557 | 269.1 | 246.7 | 221.1 |
|                                                   | 6.15        | 6.86        | 21.77       | 14.28       | 13.86       | -50.0 | -24.9 | -23.5 |
| DMSO 298.15K                                      |             |             |             |             |             |       |       |       |
| <b>1da</b>                                        | -1178.99011 | -1178.77724 | -1178.83884 | -1178.82681 | -1178.82274 | 129.6 | 104.3 | 95.8  |
| <b>2d</b> ··2H <sub>2</sub> O2DMSO                | -2025.53763 | -2025.21281 | -2025.30261 | -2025.29212 | -2025.28346 | 189.0 | 166.9 | 148.7 |
| <b>TS1<sub>dad</sub></b> ··2H <sub>2</sub> O2DMSO | -3204.51795 | -3203.97911 | -3204.10621 | -3204.09557 | -3204.08376 | 267.5 | 245.1 | 220.3 |
|                                                   | 6.14        | 6.86        | 22.11       | 14.66       | 14.08       | -51.2 | -26.1 | -24.2 |
| DMSO 298.15K                                      |             |             |             |             |             |       |       |       |
| <b>1da</b>                                        | -1178.99011 | -1178.77724 | -1178.83884 | -1178.82681 | -1178.82274 | 129.6 | 104.3 | 95.8  |
| <b>2d</b> ··H <sub>2</sub> O2DMSO                 | -1949.10074 | -1948.80433 | -1948.89073 | -1948.88046 | -1948.87144 | 181.9 | 160.2 | 141.2 |
| <b>TS1<sub>dad</sub></b> ··H <sub>2</sub> O2DMSO  | -3128.08227 | -3127.57172 | -3127.69480 | -3127.68412 | -3127.67251 | 259.0 | 236.6 | 212.1 |
|                                                   | 5.38        | 6.18        | 21.82       | 14.53       | 13.60       | -52.5 | -28.0 | 24.9  |
| DMSO 298.15K                                      |             |             |             |             |             |       |       |       |
| <b>1da</b>                                        | -1178.99011 | -1178.77724 | -1178.83884 | -1178.82681 | -1178.82274 | 129.6 | 104.3 | 95.8  |
| <b>2d</b>                                         | -766.43475  | -766.34480  | -766.38323  | -766.37030  | -766.37022  | 80.9  | 53.7  | 53.5  |
| <b>TS1<sub>dad</sub></b>                          | -1945.41944 | -1945.11569 | -1945.19374 | -1945.18179 | -1945.17598 | 164.3 | 139.1 | 126.9 |
|                                                   | 3.40        | 3.98        | 17.78       | 9.61        | 10.66       | -46.3 | -18.9 | -22.4 |
| H <sub>2</sub> O 298.15K                          |             |             |             |             |             |       |       |       |
| <b>1da</b>                                        | -1178.99029 | -1178.77743 | -1178.83905 | -1178.82697 | -1178.82290 | 129.7 | 104.3 | 95.7  |
| <b>2e</b> ··3H <sub>2</sub> O1DMSO                | -1143.61843 | -1143.33815 | -1143.42278 | -1143.41258 | -1143.40395 | 178.1 | 156.6 | 138.5 |
| <b>TS1<sub>dae</sub></b> ··3H <sub>2</sub> O1DMSO | -2322.59657 | -2322.10320 | -2322.22744 | -2322.21670 | -2322.20305 | 261.5 | 238.9 | 210.2 |
|                                                   | 7.62        | 7.77        | 21.58       | 14.34       | 14.82       | -46.3 | -22.1 | -24.0 |
| H <sub>2</sub> O 298.15K                          |             |             |             |             |             |       |       |       |
| <b>1da</b>                                        | -1178.99029 | -1178.77743 | -1178.83905 | -1178.82697 | -1178.82290 | 129.7 | 104.3 | 95.7  |
| <b>2e</b> ··2H <sub>2</sub> O1DMSO                | -1067.18962 | -1066.93664 | -1067.01150 | -1067.00122 | -1066.99494 | 157.6 | 135.9 | 122.7 |
| <b>TS1<sub>dae</sub></b> ··2H <sub>2</sub> O1DMSO | -2246.16724 | -2245.70139 | -2245.81686 | -2245.80609 | -2245.79448 | 243.0 | 220.3 | 195.9 |
|                                                   | 7.95        | 7.96        | 21.14       | 13.87       | 14.66       | -44.2 | -19.8 | -22.5 |
| DMSO 298.15K                                      |             |             |             |             |             |       |       |       |
| <b>1da</b>                                        | -1178.99011 | -1178.77724 | -1178.83884 | -1178.82681 | -1178.82274 | 129.6 | 104.3 | 95.8  |

|                                                   |             |             |             |             |             |       |       |       |
|---------------------------------------------------|-------------|-------------|-------------|-------------|-------------|-------|-------|-------|
| <b>2e</b> ··2H <sub>2</sub> O1DMSO                | -1067.18861 | -1066.93561 | -1067.00991 | -1066.99945 | -1066.99346 | 156.4 | 134.4 | 121.8 |
| <b>TS1<sub>dae</sub></b> ··2H <sub>2</sub> O1DMSO | -2246.16618 | -2245.70028 | -2245.81494 | -2245.80418 | -2245.79295 | 241.3 | 218.7 | 195.1 |
|                                                   | 7.87        | 7.89        | 21.22       | 13.86       | 14.59       | -44.7 | -20.0 | -22.5 |
| H <sub>2</sub> O 298.15K                          |             |             |             |             |             |       |       |       |
| <b>1da</b>                                        | -1178.99029 | -1178.77743 | -1178.83905 | -1178.82697 | -1178.82290 | 129.7 | 104.3 | 95.7  |
| <b>2e</b> ··2H <sub>2</sub> O2DMSO                | -1620.30535 | -1619.96310 | -1620.05652 | -1620.04662 | -1620.03732 | 196.6 | 175.8 | 156.2 |
| <b>TS1<sub>dae</sub></b> ··2H <sub>2</sub> O2DMSO | -2799.28950 | -2798.73343 | -2798.86467 | -2798.85452 | -2798.84123 | 276.2 | 254.9 | 226.9 |
|                                                   | 3.85        | 4.46        | 19.39       | 11.97       | 12.72       | -50.1 | -25.2 | -25.0 |
| DMSO 298.15K                                      |             |             |             |             |             |       |       |       |
| <b>1da</b>                                        | -1178.99011 | -1178.77724 | -1178.83884 | -1178.82681 | -1178.82274 | 129.6 | 104.3 | 95.8  |
| <b>2e</b> ··2H <sub>2</sub> O2DMSO                | -1620.30420 | -1619.96194 | -1620.05553 | -1620.04555 | -1620.03617 | 197.0 | 176.0 | 156.2 |
| <b>TS1<sub>dae</sub></b> ··2H <sub>2</sub> O2DMSO | -2799.28812 | -2798.73201 | -2798.86301 | -2798.85279 | -2798.83962 | 275.7 | 254.2 | 226.5 |
|                                                   | 3.88        | 4.50        | 19.68       | 12.28       | 12.11       | -50.9 | -26.1 | -25.5 |
| DMSO 298.15K                                      |             |             |             |             |             |       |       |       |
| <b>1da</b>                                        | -1178.99011 | -1178.77724 | -1178.83884 | -1178.82681 | -1178.82274 | 129.6 | 104.3 | 95.8  |
| <b>2e</b> ··H <sub>2</sub> O2DMSO                 | -1543.86809 | -1543.55401 | -1543.64114 | -1543.63123 | -1543.62309 | 183.4 | 162.5 | 145.4 |
| <b>TS1<sub>dae</sub></b> ··H <sub>2</sub> O2DMSO  | -2722.85272 | -2722.32490 | -2722.45148 | -2722.44138 | -2722.42795 | 266.4 | 245.2 | 216.9 |
|                                                   | 3.44        | 3.98        | 17.88       | 10.45       | 11.22       | -46.6 | -21.7 | -24.3 |
| DMSO 298.15K                                      |             |             |             |             |             |       |       |       |
| <b>1da</b>                                        | -1178.99011 | -1178.77724 | -1178.83884 | -1178.82681 | -1178.82274 | 129.6 | 104.3 | 95.8  |
| <b>2e</b>                                         | -361.20277  | -361.09542  | -361.13668  | -361.12587  | -361.12522  | 86.8  | 64.1  | 62.7  |
| <b>TS1<sub>dae</sub></b>                          | -1540.19170 | -1539.87058 | -1539.95258 | -1539.94150 | -1539.93478 | 172.6 | 149.3 | 135.1 |
|                                                   | 0.74        | 1.31        | 14.40       | 7.02        | 8.27        | -43.9 | -19.1 | -23.4 |
| H <sub>2</sub> O 298.15K                          |             |             |             |             |             |       |       |       |
| <b>1db</b>                                        | -664.43744  | -664.27907  | -664.33218  | -664.32083  | -664.31797  | 111.8 | 87.9  | 81.9  |
| <b>2d</b> ··2H <sub>2</sub> O1DMSO                | -1472.42354 | -1472.18788 | -1472.25856 | -1472.24747 | -1472.24219 | 148.8 | 125.4 | 114.3 |
| <b>TS1<sub>abd</sub></b> ··2H <sub>2</sub> O1DMSO | -2136.84790 | -2136.45311 | -2136.55387 | -2136.54290 | -2136.53524 | 212.1 | 189.0 | 172.8 |
|                                                   | 8.21        | 8.68        | 23.14       | 15.94       | 15.74       | -48.5 | -24.3 | -23.4 |
| DMSO 298.15K                                      |             |             |             |             |             |       |       |       |
| <b>1db</b>                                        | -664.43725  | -664.27887  | -664.33198  | -664.32052  | -664.31767  | 111.8 | 87.7  | 81.7  |
| <b>2d</b> ··2H <sub>2</sub> O1DMSO                | -1472.42260 | -1472.18692 | -1472.25757 | -1472.24644 | -1472.24119 | 148.7 | 125.3 | 114.2 |
| <b>TS1<sub>abd</sub></b> ··2H <sub>2</sub> O1DMSO | -2136.84699 | -2136.45217 | -2136.55263 | -2136.54185 | -2136.53387 | 211.4 | 188.8 | 172.0 |
|                                                   | 8.07        | 8.55        | 23.17       | 15.76       | 15.68       | -49.0 | -24.2 | -23.9 |
| H <sub>2</sub> O 298.15K                          |             |             |             |             |             |       |       |       |
| <b>1db</b>                                        | -664.43744  | -664.27907  | -664.33218  | -664.32083  | -664.31797  | 111.8 | 87.9  | 81.9  |
| <b>2d</b> ··2H <sub>2</sub> O2DMSO                | -2025.53882 | -2025.21402 | -2025.30401 | -2025.29352 | -2025.28476 | 189.4 | 167.3 | 148.9 |
| <b>TS1<sub>abd</sub></b> ··2H <sub>2</sub> O2DMSO | -2689.96916 | -2689.48473 | -2689.60283 | -2689.59252 | -2689.58268 | 248.6 | 226.9 | 206.2 |
|                                                   | 4.46        | 5.25        | 20.93       | 13.70       | 12.58       | -52.6 | -28.3 | -24.6 |
| DMSO 298.15K                                      |             |             |             |             |             |       |       |       |

|                                                   |             |             |             |             |             |       |       |       |
|---------------------------------------------------|-------------|-------------|-------------|-------------|-------------|-------|-------|-------|
| <b>1db</b>                                        | -664.43725  | -664.27887  | -664.33198  | -664.32052  | -664.31767  | 111.8 | 87.7  | 81.7  |
| <b>2d</b> ··2H <sub>2</sub> O2DMSO                | -2025.53763 | -2025.21281 | -2025.30261 | -2025.29212 | -2025.28346 | 189.0 | 166.9 | 148.7 |
| <b>TS1<sub>abd</sub></b> ··2H <sub>2</sub> O2DMSO | -2689.96784 | -2689.48336 | -2689.60179 | -2689.59141 | -2689.58145 | 249.3 | 227.4 | 206.5 |
|                                                   | 4.42        | 5.22        | 20.58       | 13.32       | 12.35       | -51.5 | -27.2 | -23.9 |
| DMSO 298.15K                                      |             |             |             |             |             |       |       |       |
| <b>1db</b>                                        | -664.43725  | -664.27887  | -664.33198  | -664.32052  | -664.31767  | 111.8 | 87.7  | 81.7  |
| <b>2d</b> ··H <sub>2</sub> O2DMSO                 | -1949.10074 | -1948.80433 | -1948.89073 | -1948.88046 | -1948.87144 | 181.9 | 160.2 | 141.2 |
| <b>TS1<sub>abd</sub></b> ··H <sub>2</sub> O2DMSO  | -2613.53122 | -2613.07515 | -2613.18721 | -2613.17980 | -2613.16973 | 235.9 | 220.3 | 199.1 |
|                                                   | 4.25        | 5.05        | 22.28       | 13.29       | 12.13       | -57.8 | -27.6 | -23.8 |
| DMSO 298.15K                                      |             |             |             |             |             |       |       |       |
| <b>1db</b>                                        | -664.43725  | -664.27887  | -664.33198  | -664.32052  | -664.31767  | 111.8 | 87.7  | 81.7  |
| <b>2d</b>                                         | -766.43475  | -766.34480  | -766.38323  | -766.37030  | -766.37022  | 80.9  | 53.7  | 53.5  |
| <b>TS1<sub>abd</sub></b>                          | -1430.86883 | -1430.61953 | -1430.68885 | -1430.67735 | -1430.67291 | 145.9 | 121.7 | 112.3 |
|                                                   | 1.99        | 2.60        | 16.54       | 8.45        | 9.40        | -46.8 | -19.6 | -22.8 |
| H <sub>2</sub> O 298.15K                          |             |             |             |             |             |       |       |       |
| <b>1db</b>                                        | -664.43744  | -664.27907  | -664.33218  | -664.32083  | -664.31797  | 111.8 | 87.9  | 81.9  |
| <b>2e</b> ··2H <sub>2</sub> O1DMSO                | -1067.18962 | -1066.93664 | -1067.01150 | -1067.00122 | -1066.99494 | 157.6 | 135.9 | 122.7 |
| <b>TS1<sub>dbe</sub></b> ··2H <sub>2</sub> O1DMSO | -1731.61981 | -1731.20773 | -1731.31280 | -1731.30243 | -1731.29275 | 221.1 | 199.3 | 179.0 |
|                                                   | 4.55        | 5.01        | 19.38       | 12.31       | 12.66       | -48.2 | -24.5 | -25.6 |
| DMSO 298.15K                                      |             |             |             |             |             |       |       |       |
| <b>1db</b>                                        | -664.43725  | -664.27887  | -664.33198  | -664.32052  | -664.31767  | 111.8 | 87.7  | 81.7  |
| <b>2e</b> ··2H <sub>2</sub> O1DMSO                | -1067.18861 | -1066.93561 | -1067.00991 | -1066.99945 | -1066.99346 | 156.4 | 134.4 | 121.8 |
| <b>TS1<sub>dbe</sub></b> ··2H <sub>2</sub> O1DMSO | -1731.61888 | -1731.20677 | -1731.31175 | -1731.30143 | -1731.29180 | 220.9 | 199.2 | 179.0 |
|                                                   | 4.38        | 4.84        | 18.91       | 11.63       | 12.13       | -47.2 | -22.8 | -24.4 |
| H <sub>2</sub> O 298.15K                          |             |             |             |             |             |       |       |       |
| <b>1db</b>                                        | -664.43744  | -664.27907  | -664.33218  | -664.32083  | -664.31797  | 111.8 | 87.9  | 81.9  |
| <b>2e</b> ··2H <sub>2</sub> O2DMSO                | -1620.30535 | -1619.96310 | -1620.05652 | -1620.04662 | -1620.03732 | 196.6 | 175.8 | 156.2 |
| <b>TS1<sub>dbe</sub></b> ··2H <sub>2</sub> O2DMSO | -2284.74135 | -2284.23963 | -2284.36170 | -2284.35173 | -2284.34059 | 256.9 | 235.9 | 212.5 |
|                                                   | 0.90        | 1.59        | 16.94       | 9.86        | 9.22        | -51.5 | -27.7 | -25.4 |
| DMSO 298.15K                                      |             |             |             |             |             |       |       |       |
| <b>1db</b>                                        | -664.43725  | -664.27887  | -664.33198  | -664.32052  | -664.31767  | 111.8 | 87.7  | 81.7  |
| <b>2e</b> ··2H <sub>2</sub> O2DMSO                | -1620.30420 | -1619.96194 | -1620.05553 | -1620.04555 | -1620.03617 | 197.0 | 176.0 | 156.2 |
| <b>TS1<sub>dbe</sub></b> ··2H <sub>2</sub> O2DMSO | -2284.74005 | -2284.23828 | -2284.35946 | -2284.34941 | -2284.33917 | 255.0 | 233.9 | 212.4 |
|                                                   | 0.88        | 1.59        | 17.60       | 10.45       | 9.20        | -53.7 | -29.7 | -25.5 |
| DMSO 298.15K                                      |             |             |             |             |             |       |       |       |
| <b>1db</b>                                        | -664.43725  | -664.27887  | -664.33198  | -664.32052  | -664.31767  | 111.8 | 87.7  | 81.7  |
| <b>2e</b> ··H <sub>2</sub> O2DMSO                 | -1543.86809 | -1543.55401 | -1543.64114 | -1543.63123 | -1543.62309 | 183.4 | 162.5 | 145.4 |
| <b>TS1<sub>dbe</sub></b> ··H <sub>2</sub> O2DMSO  | -2208.30399 | -2207.83075 | -2207.94913 | -2207.93920 | -2207.92654 | 249.1 | 228.3 | 201.6 |
|                                                   | 0.85        | 1.34        | 15.05       | 7.88        | 8.93        | -46.0 | -21.9 | -25.4 |

| DMSO 298.15K             |             |             |             |             |             |       |       |       |
|--------------------------|-------------|-------------|-------------|-------------|-------------|-------|-------|-------|
| <b>1db</b>               | -664.43725  | -664.27887  | -664.33198  | -664.32052  | -664.31767  | 111.8 | 87.7  | 81.7  |
| <b>2e</b>                | -361.20277  | -361.09542  | -361.13668  | -361.12587  | -361.12522  | 86.8  | 64.1  | 62.7  |
| <b>TS<sub>1dbe</sub></b> | -1025.64242 | -1025.37569 | -1025.44765 | -1025.43694 | -1025.43228 | 151.5 | 128.9 | 119.1 |
|                          | -1.51       | -0.88       | 13.18       | 5.93        | 6.66        | -47.2 | -22.8 | -25.3 |

**S14** The energy, enthalpy, free energy (au) and entropy (cal·mol<sup>-1</sup>·K<sup>-1</sup>) for the reactions in **Fig.1**, obtained with different models.

| species                                     | E           | H           | G(gas)      | G(sol)      | G <sub>qRRHO</sub> (l) | S(gas) | S(sol) | S <sub>qRRHO</sub> (l) |
|---------------------------------------------|-------------|-------------|-------------|-------------|------------------------|--------|--------|------------------------|
| MeOH 313.15K CAM-B3LYP+IDSCRF/TZVP          |             |             |             |             |                        |        |        |                        |
| <b>1a</b>                                   | -2810.69342 | -2810.50090 | -2810.55115 | -2810.53985 | -2810.53841            | 100.7  | 78.0   | 75.2                   |
| <b>2a</b>                                   | -265.48638  | -265.37965  | -265.41721  | -265.40562  | -265.40518             | 75.3   | 52.0   | 51.2                   |
| <b>TS<sub>aa</sub></b>                      | -3076.15068 | -3075.85049 | -3075.92139 | -3075.91042 | -3075.90380            | 142.1  | 120.1  | 107.0                  |
|                                             | 18.27       | 18.86       | 29.47       | 21.99       | 24.96                  | -33.9  | -10.0  | -19.4                  |
| <b>P<sub>aa</sub></b>                       | -3076.21660 | -3075.91290 | -3075.98299 | -3075.97195 | -3075.96698            | 140.5  | 118.3  | 108.4                  |
|                                             | -23.09      | -20.30      | -9.18       | -16.62      | -14.68                 | -35.5  | -11.8  | -17.9                  |
| MeOH 313.15K CAM-B3LYP+IDSCRF/6-311++G(d,p) |             |             |             |             |                        |        |        |                        |
| <b>1a</b>                                   | -2810.64389 | -2810.45181 | -2810.50204 | -2810.49073 | -2810.48931            | 100.7  | 78.0   | 75.1                   |
| <b>2a</b>                                   | -265.47123  | -265.36468  | -265.40235  | -265.39072  | -265.39023             | 75.5   | 52.2   | 51.2                   |
| <b>TS<sub>aa</sub></b>                      | -3076.08605 | -3075.78654 | -3075.85744 | -3075.84642 | -3075.8399             | 142.1  | 120.0  | 106.7                  |
|                                             | 18.24       | 18.79       | 29.46       | 21.98       | 24.90                  | -34.1  | -10.2  | -19.6                  |
| <b>P<sub>aa</sub></b>                       | -3076.15209 | -3075.84906 | -3075.91906 | -3075.90788 | -3075.90302            | 140.3  | 117.9  | 108.1                  |
|                                             | -23.20      | -20.44      | -9.21       | -16.59      | -14.73                 | -35.9  | -12.3  | -18.2                  |
| MeOH 313.15K B3LYP+IDSCRF/DZVP              |             |             |             |             |                        |        |        |                        |
| <b>1a</b>                                   | -2810.19948 | -2810.00783 | -2810.05822 | -2810.04690 | -2810.04549            | 101.0  | 78.3   | 75.5                   |
| <b>2a</b>                                   | -265.56510  | -265.45933  | -265.49700  | -265.48561  | -265.48523             | 75.5   | 52.6   | 51.9                   |
| <b>TS<sub>aa</sub></b>                      | -3075.73756 | -3075.43926 | -3075.51096 | -3075.50010 | -3075.49329            | 143.7  | 121.9  | 108.3                  |
|                                             | 16.96       | 17.51       | 27.77       | 20.34       | 23.49                  | -32.8  | -9.0   | -19.1                  |
| <b>P<sub>aa</sub></b>                       | -3075.79594 | -3075.49407 | -3075.56456 | -3075.55369 | -3075.54872            | 141.2  | 119.5  | 109.5                  |
|                                             | -19.68      | -16.89      | -5.86       | -13.29      | -11.30                 | -35.2  | -11.5  | -17.8                  |
| MeOH 313.15K M062x+IDSCRF/DZVP              |             |             |             |             |                        |        |        |                        |
| <b>1a</b>                                   | -2810.06682 | -2809.87337 | -2809.92351 | -2809.91226 | -2809.91086            | 100.5  | 77.9   | 75.1                   |
| <b>2a</b>                                   | -265.44255  | -265.33546  | -265.37291  | -265.36128  | -265.36098             | 75.0   | 51.7   | 51.1                   |
| <b>TS<sub>aa</sub></b>                      | -3075.48346 | -3075.18204 | -3075.25286 | -3075.24185 | -3075.23521            | 141.9  | 119.9  | 106.4                  |
|                                             | 16.26       | 16.81       | 27.33       | 19.89       | 22.99                  | -33.6  | -9.8   | -19.8                  |
| <b>P<sub>aa</sub></b>                       | -3075.54778 | -3075.24306 | -3075.31277 | -3075.30187 | -3075.29714            | 139.7  | 117.8  | 108.4                  |
|                                             | -24.10      | -21.48      | -10.26      | -17.78      | -15.88                 | -35.8  | -11.8  | -17.9                  |
| MeOH 313.15K ωB97x+IDSCRF/DZVP              |             |             |             |             |                        |        |        |                        |
| <b>1a</b>                                   | -2810.11824 | -2809.92418 | -2809.97424 | -2809.96312 | -2809.96174            | 100.3  | 78.0   | 75.3                   |



|                                             |             |             |             |             |             |       |       |       |
|---------------------------------------------|-------------|-------------|-------------|-------------|-------------|-------|-------|-------|
| <b>2a</b>                                   | -265.48457  | -265.37710  | -265.41458  | -265.40298  | -265.40263  | 75.1  | 51.9  | 51.2  |
| <b>TS<sub>aa</sub></b>                      | -3075.57234 | -3075.26995 | -3075.34107 | -3075.33012 | -3075.32338 | 142.5 | 120.6 | 107.1 |
|                                             | 19.12       | 19.66       | 29.96       | 22.58       | 25.72       | -32.9 | -9.3  | -19.4 |
| <b>P<sub>aa</sub></b>                       | -3075.64058 | -3075.33474 | -3075.40464 | -3075.39363 | -3075.38877 | 140.1 | 118.0 | 108.3 |
|                                             | -23.70      | -21.00      | -9.93       | -17.28      | -15.31      | -35.4 | -11.9 | 18.2  |
| MeOH 313.15K $\omega$ B97xD +IDSCRF/DZVP    |             |             |             |             |             |       |       |       |
| <b>1a</b>                                   | -2810.14836 | -2809.95474 | -2810.00486 | -2809.99362 | -2809.99221 | 100.4 | 77.9  | 75.1  |
| <b>2a</b>                                   | -265.46959  | -265.36244  | -265.39997  | -265.38843  | -265.38806  | 75.2  | 52.1  | 51.3  |
| <b>TS<sub>aa</sub></b>                      | -3075.59114 | -3075.28946 | -3075.35995 | -3075.34906 | -3075.34264 | 141.3 | 119.4 | 106.5 |
|                                             | 16.82       | 17.39       | 28.16       | 20.70       | 23.61       | -34.4 | -10.5 | -19.9 |
| <b>P<sub>aa</sub></b>                       | -3075.65854 | -3075.35330 | -3075.42356 | -3075.41275 | -3075.40767 | 140.8 | 119.1 | 108.9 |
|                                             | -25.47      | -22.67      | -11.75      | -19.26      | -17.19      | -34.8 | -10.8 | -17.5 |
| MeOH 313.15K CAM-B3LYP/DZVP                 |             |             |             |             |             |       |       |       |
| <b>1a</b>                                   | -2810.13914 | -2809.94622 | -2809.9930  | -           | -           | 98.5  | -     | -     |
| <b>2a</b>                                   | -265.41657  | -265.31001  | -265.34529  | -           | -           | 74.2  | -     | -     |
| <b>TS<sub>aa</sub></b>                      | -3075.51251 | -3075.21175 | -3075.27714 | -           | -           | 137.6 | -     | -     |
|                                             | 27.10       | 27.91       | 38.37       | -           | -           | -35.1 | -     | -     |
| MeOH 313.15K M062x/DZVP                     |             |             |             |             |             |       |       |       |
| <b>1a</b>                                   | -2810.06494 | -2809.87187 | -2809.91844 | -           | -           | 98.0  | -     | -     |
| <b>2a</b>                                   | -265.433315 | -265.327832 | -265.361285 | -           | -           | 70.4  | -     | -     |
| <b>TS<sub>aa</sub></b>                      | -3075.45889 | -3075.15820 | -3075.22307 | -           | -           | 136.5 | -     | -     |
|                                             | 24.70       | 26.04       | 35.55       | -           | -           | -31.9 | -     | -     |
| MeOH 313.15K B2PLYP+IDSCRF/DZVP             |             |             |             |             |             |       |       |       |
| <b>1a</b>                                   | -2809.07812 | -           | -           | -           | -           | -     | -     | -     |
| <b>2a</b>                                   | -264.980550 | -           | -           | -           | -           | -     | -     | -     |
| <b>TS<sub>aa</sub></b>                      | -3074.02844 | -           | -           | -           | -           | -     | -     | -     |
|                                             | 18.97       | -           | -           | -           | -           | -     | -     | -     |
| MeOH 273.15K CAM-B3LYP+IDSCRF/TZVP          |             |             |             |             |             |       |       |       |
| <b>1ba</b>                                  | -251.84825  | -251.68241  | -251.71372  | -251.70334  | -251.70334  | 72.0  | 48.1  | 48.1  |
| <b>2b</b>                                   | -1100.82169 | -1100.71540 | -1100.75962 | -1100.74804 | -1100.74685 | 101.6 | 75.0  | 72.2  |
| <b>TS<sub>1bab</sub></b>                    | -1352.65620 | -1352.38252 | -1352.43808 | -1352.42734 | -1352.42519 | 127.6 | 103.0 | 98.0  |
|                                             | 8.62        | 9.59        | 22.13       | 15.09       | 15.69       | -45.9 | -20.1 | -22.3 |
| <b>IN<sub>1bab</sub></b>                    | -1352.70211 | -1352.42566 | -1352.48256 | -1352.47190 | -1352.46955 | 130.7 | 106.2 | 100.8 |
|                                             | -20.19      | -17.48      | -5.79       | -12.88      | -12.15      | -42.8 | -16.8 | -19.5 |
| <b>TS<sub>2bab</sub></b>                    | -1604.55079 | -1604.10932 | -1604.18107 | -1604.17065 | -1604.16573 | 164.8 | 140.9 | 129.6 |
|                                             | -20.46      | -18.26      | 3.76        | -10.00      | -7.66       | -80.8 | -30.3 | -38.8 |
| <b>P<sub>bab</sub></b>                      | -1604.56962 | -1604.12323 | -1604.19762 | -1604.18732 | -1604.18164 | 170.9 | 147.2 | 134.2 |
|                                             | -32.27      | -27.00      | -6.63       | -20.46      | -17.65      | -74.7 | -24.0 | -34.2 |
| MeOH 273.15K CAM-B3LYP+IDSCRF/6-311++G(d,p) |             |             |             |             |             |       |       |       |

|                                |             |             |             |             |             |       |       |       |
|--------------------------------|-------------|-------------|-------------|-------------|-------------|-------|-------|-------|
| <b>1ba</b>                     | -251.83287  | -251.66744  | -251.69879  | -251.68859  | -251.68859  | 72.0  | 48.6  | 48.6  |
| <b>2b</b>                      | -1100.78662 | -1100.68021 | -1100.72437 | -1100.71306 | -1100.71188 | 101.5 | 75.5  | 72.8  |
| <b>TS1<sub>bab</sub></b>       | -1352.60757 | -1352.33439 | -1352.39000 | -1352.37879 | -1352.37663 | 127.8 | 102.0 | 97.0  |
|                                | 7.48        | 8.32        | 20.81       | 14.34       | 14.96       | -45.7 | -22.0 | 24.3  |
| <b>INI<sub>bab</sub></b>       | -1352.65304 | -1352.37672 | -1352.43365 | -1352.42305 | -1352.42070 | 130.8 | 106.4 | 101.0 |
|                                | -21.05      | -18.24      | -6.58       | -13.43      | -12.69      | -42.7 | -17.6 | -20.3 |
| <b>TS2<sub>bab</sub></b>       | -1604.48896 | -1604.04812 | -1604.12044 | -1604.10978 | -1604.10453 | 166.1 | 141.6 | 129.6 |
|                                | -22.97      | -20.73      | 0.95        | -12.26      | -9.71       | -79.4 | -31.1 | -40.4 |
| <b>P<sub>bab</sub></b>         | -1604.5088  | -1604.06316 | -1604.13833 | -1604.12783 | -1604.12174 | 172.7 | 148.6 | 134.6 |
|                                | -35.42      | -30.16      | -10.28      | -23.59      | -20.51      | -72.8 | -24.1 | -35.4 |
| MeOH 273.15K B3LYP+IDSCRF/DZVP |             |             |             |             |             |       |       |       |
| <b>1ba</b>                     | -251.93390  | -251.76900  | -251.80041  | -251.79014  | -251.79014  | 72.2  | 48.6  | 48.6  |
| <b>2b</b>                      | -1100.89782 | -1100.79279 | -1100.83711 | -1100.82576 | -1100.82460 | 101.8 | 75.7  | 73.1  |
| <b>TS1<sub>bab</sub></b>       | -1352.82025 | -1352.54890 | -1352.60470 | -1352.59388 | -1352.59176 | 128.2 | 103.3 | 98.5  |
|                                | 7.20        | 8.09        | 20.59       | 13.82       | 14.42       | -45.8 | -21.0 | -23.2 |
| <b>INI<sub>bab</sub></b>       | -1352.85706 | -1352.58290 | -1352.64008 | -1352.62930 | -1352.62699 | 131.3 | 106.6 | 101.3 |
|                                | -15.90      | -13.25      | -1.61       | -8.41       | -7.69       | -42.6 | -17.7 | -20.3 |
| <b>TS2<sub>bab</sub></b>       | -1604.79021 | -1604.35222 | -1604.42475 | -1604.41415 | -1604.40903 | 166.6 | 142.3 | 130.5 |
|                                | -15.43      | -13.45      | 8.27        | -5.09       | -2.61       | -79.5 | -30.6 | -39.6 |
| <b>P<sub>bab</sub></b>         | -1604.81965 | -1604.37651 | -1604.45383 | -1604.44376 | -1604.43672 | 177.6 | 154.5 | 138.3 |
|                                | -33.9       | -28.69      | -9.98       | -23.67      | -19.98      | -68.5 | -18.4 | -31.8 |
| MeOH 273.15K M062x+IDSCRF/DZVP |             |             |             |             |             |       |       |       |
| <b>1ba</b>                     | -251.80077  | -251.63419  | -251.66547  | -251.65513  | -251.65513  | 71.9  | 48.1  | 48.1  |
| <b>2b</b>                      | -1100.59573 | -1100.48877 | -1100.53275 | -1100.52109 | -1100.51999 | 101.0 | 74.2  | 71.7  |
| <b>TS1<sub>bab</sub></b>       | -1352.39895 | -1352.12445 | -1352.17979 | -1352.16876 | -1352.16674 | 127.1 | 101.8 | 97.2  |
|                                | -1.54       | -0.93       | 11.57       | 4.68        | 5.26        | -45.7 | -20.6 | -22.7 |
| <b>INI<sub>bab</sub></b>       | -1352.43862 | -1352.16089 | -1352.21732 | -1352.20670 | -1352.20447 | 129.7 | 105.2 | 100.1 |
|                                | -26.43      | -23.80      | -11.99      | -19.13      | 18.42       | -43.2 | -17.1 | -19.7 |
| <b>TS2<sub>bab</sub></b>       | -1604.24642 | -1603.80298 | -1603.87333 | -1603.86276 | -1603.85824 | 161.6 | 137.3 | 127   |
|                                | -30.84      | -28.76      | -6.05       | -19.71      | -17.56      | -83.2 | -33.1 | -40.9 |
| <b>P<sub>bab</sub></b>         | -1604.26772 | -1603.81993 | -1603.8928  | -1603.88241 | -1603.87743 | 167.4 | 143.5 | 132.1 |
|                                | -44.21      | -39.39      | -18.27      | -32.04      | -29.61      | -77.4 | -26.9 | -35.8 |
| MeOH 273.15K ωB97x+IDSCRF/DZVP |             |             |             |             |             |       |       |       |
| <b>1ba</b>                     | -251.86009  | -251.69280  | -251.72406  | -251.71379  | -251.71379  | 71.8  | 48.2  | 48.2  |
| <b>2b</b>                      | -1100.69937 | -1100.59191 | -1100.63597 | -1100.62426 | -1100.62311 | 101.2 | 74.3  | 71.7  |
| <b>TS1<sub>bab</sub></b>       | -1352.55156 | -1352.27558 | -1352.33080 | -1352.32004 | -1352.31801 | 126.9 | 102.1 | 97.5  |
|                                | 4.96        | 5.73        | 18.34       | 11.30       | 11.85       | -46.2 | -20.4 | -22.4 |
| <b>INI<sub>bab</sub></b>       | -1352.59708 | -1352.31770 | -1352.37427 | -1352.36361 | -1352.36133 | 129.9 | 105.5 | 100.2 |
|                                | -23.61      | -20.70      | -8.94       | -16.04      | -15.33      | -43.1 | -17.1 | -19.7 |

|                                                |             |             |             |             |             |       |       |       |
|------------------------------------------------|-------------|-------------|-------------|-------------|-------------|-------|-------|-------|
| <b>TS2<sub>bab</sub></b>                       | -1604.46072 | -1604.01589 | -1604.08773 | -1604.07714 | -1604.07213 | 165   | 140.7 | 129.2 |
|                                                | -25.83      | -24.08      | -2.28       | -15.87      | -13.45      | -79.8 | -30.0 | -38.9 |
| <b>P<sub>bab</sub></b>                         | -1604.48438 | -1604.03421 | -1604.10643 | -1604.09619 | -1604.09157 | 165.9 | 142.4 | 131.8 |
|                                                | -40.68      | -35.58      | -14.02      | -27.83      | -25.64      | -78.9 | -28.3 | -36.3 |
| MeOH 273.15K $\omega$ B97xD+IDSCRF/DZVP        |             |             |             |             |             |       |       |       |
| <b>1ba</b>                                     | -251.85343  | -251.68654  | -251.71778  | -251.70738  | -251.70738  | 71.8  | 47.9  | 47.9  |
| <b>2b</b>                                      | -1100.64924 | -1100.54237 | -1100.58667 | -1100.57532 | -1100.57410 | 101.8 | 75.7  | 72.9  |
| <b>TS1<sub>bab</sub></b>                       | -1352.50184 | -1352.22664 | -1352.28218 | -1352.27145 | -1352.26928 | 127.6 | 102.9 | 98.0  |
|                                                | 0.52        | 1.42        | 13.97       | 7.06        | 7.66        | -46.0 | -20.7 | -22.8 |
| <b>IN1<sub>bab</sub></b>                       | -1352.54410 | -1352.26582 | -1352.32273 | -1352.31190 | -1352.30950 | 130.7 | 105.9 | 100.3 |
|                                                | -26.00      | -23.16      | -11.47      | -18.32      | -17.58      | -42.8 | -17.7 | -20.4 |
| <b>TS2<sub>bab</sub></b>                       | -1604.40508 | -1603.96091 | -1604.03288 | -1604.02081 | -1604.01561 | 165.3 | 137.6 | 125.6 |
|                                                | -30.74      | -28.53      | -6.68       | -19.28      | -16.78      | -80.1 | -33.9 | -43.1 |
| <b>P<sub>bab</sub></b>                         | -1604.4305  | -1603.98122 | -1604.05386 | -1604.04365 | -1604.03876 | 166.9 | 143.4 | 132.2 |
|                                                | -46.69      | -41.27      | -19.845     | -33.62      | -31.31      | -78.5 | -28.1 | -36.5 |
| MeOH 273.15K CAM-B3LYP/DZVP                    |             |             |             |             |             |       |       |       |
| <b>1ba</b>                                     | -1100.61941 | -1100.51063 | -1100.56030 | –           | –           | 104.6 | –     | –     |
| <b>2b</b>                                      | -251.782564 | -251.614787 | -251.64991  | –           | –           | 73.9  | –     | –     |
| <b>TS1<sub>bab</sub></b>                       | -1352.38796 | 8.79416213  | -1352.17223 | –           | –           | 131.6 | –     | –     |
|                                                | 8.79        | 9.85        | 23.83       | –           | –           | -46.9 | –     | –     |
| MeOH 273.15K M062x/DZVP                        |             |             |             |             |             |       |       |       |
| <b>1ba</b>                                     | -1100.58395 | -1100.47483 | -1100.52421 | –           | –           | 103.9 | –     | –     |
| <b>2b</b>                                      | -251.796982 | -251.629412 | -251.664526 | –           | –           | 73.9  | –     | –     |
| <b>TS1<sub>bab</sub></b>                       | -1352.38108 | -1352.10288 | -1352.16482 | –           | –           | 130.3 | –     | –     |
|                                                | -0.09       | 0.85        | 15.00       | –           | –           | -47.5 | –     | –     |
| MeOH 273.15K B2PLYP+IDSCRF/DZVP                |             |             |             |             |             |       |       |       |
| <b>1ba</b>                                     | -1099.44561 | –           | –           | –           | –           | –     | –     | –     |
| <b>2b</b>                                      | -251.33028  | –           | –           | –           | –           | –     | –     | –     |
| <b>TS1<sub>bab</sub></b>                       | -1350.75506 | –           | –           | –           | –           | –     | –     | –     |
|                                                | 13.07       | –           | –           | –           | –           | –     | –     | –     |
| H <sub>2</sub> O 298.15K CAM-B3LYP+IDSCRF/TZVP |             |             |             |             |             |       |       |       |
| <b>1da</b>                                     | -1179.21659 | -1179.00432 | -1179.06690 | -1179.05508 | -1179.05049 | 131.7 | 106.9 | 97.2  |
| <b>2d</b>                                      | -766.56622  | -766.47669  | -766.51518  | -766.50239  | -766.50230  | 81.0  | 54.1  | 53.9  |
| <b>TS1<sub>dad</sub></b>                       | -1945.77440 | -1945.47157 | -1945.54978 | -1945.53794 | -1945.53200 | 164.6 | 139.7 | 127.2 |
|                                                | 5.28        | 5.92        | 20.27       | 12.26       | 13.05       | -48.1 | -21.3 | -23.9 |
| <b>IN1<sub>dad</sub></b>                       | -1945.78679 | -1945.48225 | -1945.56048 | -1945.54864 | -1945.54264 | 164.7 | 139.7 | 127.1 |
|                                                | -2.50       | -0.78       | 13.55       | 5.54        | 6.37        | -48.1 | -21.2 | -24.0 |
| <b>TS2<sub>dad</sub></b>                       | -1945.78170 | -1945.47893 | -1945.55742 | -1945.54551 | -1945.53944 | 165.2 | 140.1 | 127.4 |
|                                                | 0.70        | 1.31        | 15.47       | 7.51        | 8.38        | -47.6 | -20.8 | -23.7 |

|                                                         |             |             |             |             |             |       |       |       |
|---------------------------------------------------------|-------------|-------------|-------------|-------------|-------------|-------|-------|-------|
| <b>P<sub>dad</sub></b>                                  | -1434.32247 | -1434.12358 | -1434.18191 | -1434.17011 | -1434.16659 | 122.8 | 97.9  | 90.5  |
| <b>4-NO<sub>2</sub>-PhO<sup>•</sup></b>                 | -511.48103  | -511.37803  | -511.41988  | -511.40637  | -511.40583  | 88.1  | 59.6  | 58.5  |
|                                                         | -12.98      | -12.93      | -12.37      | -11.93      | -12.32      | -1.8  | -3.5  | -2.1  |
| H <sub>2</sub> O 298.15K CAM-B3LYP+IDSCRF/6-311++G(d,p) |             |             |             |             |             |       |       |       |
| <b>1da</b>                                              | -1179.16994 | -1178.95783 | -1179.02046 | -1179.00873 | -1179.00410 | 131.8 | 107.1 | 97.4  |
| <b>2d</b>                                               | -766.55308  | -766.46350  | -766.50189  | -766.48897  | -766.48888  | 80.8  | 53.6  | 53.4  |
| <b>TS1<sub>dad</sub></b>                                | -1945.71347 | -1945.41071 | -1945.48881 | -1945.47681 | -1945.47090 | 164.4 | 139.1 | 126.7 |
|                                                         | 5.99        | 6.66        | 21.05       | 13.11       | 13.86       | -48.3 | -21.6 | -24.1 |
| <b>IN1<sub>dad</sub></b>                                | -1945.72624 | -1945.42159 | -1945.49954 | -1945.48744 | -1945.48150 | 164.1 | 138.6 | 126.1 |
|                                                         | -2.02       | -0.16       | 14.31       | 6.44        | 7.20        | -48.6 | -22.1 | -24.7 |
| <b>TS2<sub>dad</sub></b>                                | -1945.72106 | -1945.41822 | -1945.49662 | -1945.48454 | -1945.47843 | 165.0 | 139.6 | 126.7 |
|                                                         | 1.23        | 1.95        | 16.15       | 8.26        | 9.13        | -47.6 | -21.2 | -24.1 |
| <b>P<sub>dad</sub></b>                                  | -1434.2912  | -1434.09246 | -1434.1506  | -1434.13893 | -1434.13549 | 122.4 | 97.8  | 90.6  |
| <b>4-NO<sub>2</sub>-PhO<sup>•</sup></b>                 | -511.45221  | -511.34911  | -511.39078  | -511.37717  | -511.37666  | 87.7  | 59.1  | 58    |
|                                                         | -12.79      | -12.70      | -11.94      | -11.55      | -12.10      | -2.5  | -3.8  | -2.2  |
| H <sub>2</sub> O 298.15K B3LYP+IDSCRF/DZVP              |             |             |             |             |             |       |       |       |
| <b>1da</b>                                              | -1179.37909 | -1179.16898 | -1179.23100 | -1179.21921 | -1179.21511 | 130.5 | 105.7 | 97.1  |
| <b>2d</b>                                               | -766.59465  | -766.50585  | -766.54449  | -766.53209  | -766.53200  | 81.3  | 55.2  | 55.0  |
| <b>TS1<sub>dad</sub></b>                                | -1945.96443 | -1945.66461 | -1945.74284 | -1945.73094 | -1945.72526 | 164.6 | 139.6 | 127.6 |
|                                                         | 5.84        | 6.41        | 20.49       | 12.78       | 13.71       | -47.2 | -21.3 | -24.5 |
| <b>IN1<sub>dad</sub></b>                                | -1945.97380 | -1945.67237 | -1945.75075 | -1945.73866 | -1945.73299 | 164.9 | 139.5 | 127.6 |
|                                                         | -0.04       | 1.54        | 15.52       | 7.93        | 8.86        | -46.9 | -21.4 | -24.5 |
| <b>TS2<sub>dad</sub></b>                                | -1945.97123 | -1945.67126 | -1945.75068 | -1945.73878 | -1945.73242 | 167.1 | 142.1 | 128.7 |
|                                                         | 1.58        | 2.24        | 15.57       | 7.86        | 9.22        | -44.7 | -18.8 | -23.4 |
| <b>P<sub>dad</sub></b>                                  | -1434.39882 | -1434.20198 | -1434.26020 | -1434.24856 | -1434.24529 | 122.5 | 98.0  | 91.2  |
| <b>4-NO<sub>2</sub>-PhO<sup>•</sup></b>                 | -511.59947  | -511.49705  | -511.53868  | -511.52545  | -511.52504  | 87.6  | 59.8  | 58.9  |
|                                                         | -15.40      | -15.19      | -14.68      | -14.25      | -14.57      | -1.7  | -3.1  | -2.0  |
| H <sub>2</sub> O 298.15K M062x+IDSCRF/DZVP              |             |             |             |             |             |       |       |       |
| <b>1da</b>                                              | -1179.00884 | -1178.79616 | -1178.85804 | -1178.84613 | -1178.84194 | 130.2 | 105.2 | 96.3  |
| <b>2d</b>                                               | -766.43291  | -766.34307  | -766.38154  | -766.36911  | -766.36903  | 81.0  | 54.8  | 54.6  |
| <b>TS1<sub>dad</sub></b>                                | -1945.44800 | -1945.14462 | -1945.22273 | -1945.21092 | -1945.20515 | 164.4 | 139.5 | 127.4 |
|                                                         | -3.92       | -3.38       | 10.57       | 2.71        | 3.65        | -46.8 | -20.4 | -23.6 |
| <b>IN1<sub>dad</sub></b>                                | -1945.46357 | -1945.15816 | -1945.23520 | -1945.22307 | -1945.21766 | 162.1 | 136.6 | 125.2 |
|                                                         | -13.69      | -11.88      | 2.75        | -4.91       | -4.20       | -49.1 | -23.4 | -25.7 |
| <b>TS2<sub>dad</sub></b>                                | -1945.45379 | -1945.15023 | -1945.22832 | -1945.21681 | -1945.21096 | 164.4 | 140.1 | 127.8 |
|                                                         | -7.56       | -6.90       | 7.07        | -0.99       | 0.01        | -46.8 | -19.8 | -23.1 |
| <b>P<sub>dad</sub></b>                                  | -1434.08677 | -1433.88787 | -1433.94627 | -1433.93453 | -1433.93104 | 122.9 | 98.2  | 90.9  |
| <b>4-NO<sub>2</sub>-PhO<sup>•</sup></b>                 | -511.37692  | -511.27318  | -511.31469  | -511.30134  | -511.30094  | 87.4  | 59.3  | 58.4  |
|                                                         | -13.77      | -13.697     | -13.42      | -12.94      | -13.18      | -0.9  | -2.5  | -1.6  |

| H <sub>2</sub> O 298.15K ωB97x+IDSCRF/DZVP     |             |             |             |             |             |       |       |       |
|------------------------------------------------|-------------|-------------|-------------|-------------|-------------|-------|-------|-------|
| <b>1da</b>                                     | -1179.12523 | -1178.91154 | -1178.97344 | -1178.96161 | -1178.95735 | 130.3 | 105.4 | 96.4  |
| <b>2d</b>                                      | -766.48012  | -766.38984  | -766.42821  | -766.41537  | -766.41529  | 80.7  | 53.7  | 53.6  |
| <b>TS1<sub>dad</sub></b>                       | -1945.60534 | -1945.30050 | -1945.37808 | -1945.36609 | -1945.36044 | 163.3 | 138.0 | 126.2 |
|                                                | 0.01        | 0.55        | 14.79       | 6.83        | 7.66        | -47.7 | -21.1 | -23.8 |
| <b>IN1<sub>dad</sub></b>                       | -1945.62093 | -1945.31411 | -1945.39135 | -1945.37964 | -1945.37403 | 162.6 | 137.9 | 126.1 |
|                                                | -9.78       | -7.99       | 6.46        | -1.67       | -0.87       | -48.4 | -21.2 | -23.9 |
| <b>TS2<sub>dad</sub></b>                       | -1945.61250 | -1945.30765 | -1945.38647 | -1945.37462 | -1945.36829 | 165.9 | 141.0 | 127.6 |
|                                                | -4.49       | -3.93       | 9.53        | 1.48        | 2.73        | -45.1 | -18.1 | -22.3 |
| <b>P<sub>dad</sub></b>                         | -1434.18018 | -1433.98028 | -1434.03876 | -1434.02713 | -1434.02353 | 123.1 | 98.6  | 91    |
| <b>4-NO<sub>2</sub>-PhO<sup>•</sup></b>        | -511.44527  | -511.34115  | -511.38266  | -511.36875  | -511.36831  | 87.4  | 58.1  | 57.2  |
|                                                | -12.61      | -12.58      | -12.40      | -11.86      | -12.06      | -0.5  | -2.4  | -1.8  |
| H <sub>2</sub> O 298.15K ωB97xD+IDSCRF/DZVP    |             |             |             |             |             |       |       |       |
| <b>1da</b>                                     | -1179.07288 | -1178.85991 | -1178.92184 | -1178.90994 | -1178.90572 | 130.4 | 105.3 | 96.4  |
| <b>2d</b>                                      | -766.46009  | -766.37013  | -766.40856  | -766.39600  | -766.39591  | 80.9  | 54.4  | 54.3  |
| <b>TS1<sub>dad</sub></b>                       | -1945.53566 | -1945.23156 | -1945.30901 | -1945.29729 | -1945.29176 | 163.0 | 138.3 | 126.7 |
|                                                | -1.69       | -0.95       | 13.42       | 5.43        | 6.19        | -48.2 | -21.4 | -24.0 |
| <b>IN1<sub>dad</sub></b>                       | -1945.54886 | -1945.24292 | -1945.31980 | -1945.30798 | -1945.30263 | 161.8 | 136.9 | 125.7 |
|                                                | -9.97       | -8.08       | 6.65        | -1.28       | -0.63       | -49.4 | -22.8 | -25.0 |
| <b>TS2<sub>dad</sub></b>                       | -1945.54194 | -1945.23798 | -1945.31643 | -1945.30461 | -1945.29851 | 165.1 | 140.2 | 127.4 |
|                                                | -5.63       | -4.98       | 8.77        | 0.83        | 1.96        | -46.1 | -19.5 | -23.3 |
| <b>P<sub>dad</sub></b>                         | -1434.14514 | -1433.9457  | -1434.00364 | -1433.99214 | -1433.98884 | 121.9 | 97.7  | 90.8  |
| <b>4-NO<sub>2</sub>-PhO<sup>•</sup></b>        | -511.40899  | -511.3052   | -511.34677  | -511.33326  | -511.3328   | 87.5  | 59.1  | 58.1  |
|                                                | -13.28      | -13.09      | -12.56      | -12.21      | -12.54      | -1.9  | -2.9  | -1.8  |
| H <sub>2</sub> O 298.15K B2PLYP+IDSCRF/DZVP    |             |             |             |             |             |       |       |       |
| <b>1da</b>                                     | -1177.55797 | –           | –           | –           | –           | –     | –     | –     |
| <b>2d</b>                                      | -765.724709 | –           | –           | –           | –           | –     | –     | –     |
| <b>TS1<sub>dad</sub></b>                       | -1943.26990 | –           | –           | –           | –           | –     | –     | –     |
|                                                | 8.02        | –           | –           | –           | –           | –     | –     | –     |
| H <sub>2</sub> O 298.15K CAM-B3LYP+IDSCRF/TZVP |             |             |             |             |             |       |       |       |
| <b>1da</b>                                     | -1179.21659 | -1179.00432 | -1179.06690 | -1179.05508 | -1179.05049 | 131.7 | 106.9 | 97.2  |
| <b>2e</b>                                      | -361.28378  | -361.17702  | -361.21828  | -361.20733  | -361.20664  | 86.9  | 63.8  | 62.4  |
| <b>TS1<sub>dae</sub></b>                       | -1540.49655 | -1540.17669 | -1540.25868 | -1540.24755 | -1540.24078 | 172.6 | 149.1 | 134.9 |
|                                                | 2.40        | 2.92        | 16.63       | 9.32        | 10.26       | -46.0 | -21.5 | -24.7 |
| <b>IN1<sub>dae</sub></b>                       | -1540.51193 | -1540.19031 | -1540.27040 | -1540.25929 | -1540.25357 | 168.6 | 145.2 | 133.2 |
|                                                | -7.25       | -5.63       | 9.27        | 1.96        | 2.23        | -50.0 | -25.5 | -26.4 |
| <b>TS2<sub>dae</sub></b>                       | -1540.49877 | -1540.17916 | -1540.26080 | -1540.24978 | -1540.24319 | 171.8 | 148.6 | 134.8 |
|                                                | 1.00        | 1.37        | 15.30       | 7.93        | 8.75        | -46.8 | -22.0 | -24.8 |
| <b>P<sub>dae</sub></b>                         | -1029.03772 | -1028.8222  | -1028.88281 | -1028.87224 | -1028.86884 | 127.6 | 105.3 | 98.1  |

|                                                         |             |             |             |             |             |       |       |       |
|---------------------------------------------------------|-------------|-------------|-------------|-------------|-------------|-------|-------|-------|
| <b>4-NO<sub>2</sub>-PhO<sup>•</sup></b>                 | -511.48103  | -511.37803  | -511.41988  | -511.40637  | -511.40583  | 88.1  | 59.6  | 58.5  |
|                                                         | -11.53      | -11.85      | -10.99      | -10.16      | -11.00      | -2.9  | -5.8  | -3.0  |
| H <sub>2</sub> O 298.15K CAM-B3LYP+IDSCRF/6-311++G(d,p) |             |             |             |             |             |       |       |       |
| <b>1da</b>                                              | -1179.16994 | -1178.95783 | -1179.02046 | -1179.00873 | -1179.00410 | 131.8 | 107.1 | 97.4  |
| <b>2e</b>                                               | -361.26572  | -361.15917  | -361.20095  | -361.18985  | -361.18888  | 87.9  | 64.6  | 62.5  |
| <b>TS1<sub>dae</sub></b>                                | -1540.43090 | -1540.11133 | -1540.19382 | -1540.18277 | -1540.17571 | 173.6 | 150.4 | 135.5 |
|                                                         | 2.99        | 3.56        | 17.31       | 9.92        | 10.84       | -46.1 | -21.3 | -24.4 |
| <b>IN1<sub>dae</sub></b>                                | -1540.44632 | -1540.12491 | -1540.20531 | -1540.19425 | -1540.18836 | 169.2 | 145.9 | 133.5 |
|                                                         | -6.69       | -4.96       | 10.10       | 2.72        | 2.90        | -50.5 | -25.8 | -26.4 |
| <b>TS2<sub>dae</sub></b>                                | -1540.43451 | -1540.11616 | -1540.19501 | -1540.18392 | -1540.17827 | 166.0 | 142.6 | 130.7 |
|                                                         | 0.72        | 0.53        | 16.57       | 9.20        | 9.23        | -53.8 | -29.1 | -29.2 |
| <b>P<sub>dae</sub></b>                                  | -1029.00162 | -1028.78639 | -1028.84714 | -1028.83657 | -1028.83309 | 127.9 | 105.6 | 98.3  |
| <b>4-NO<sub>2</sub>-PhO<sup>•</sup></b>                 | -511.45221  | -511.34911  | -511.39078  | -511.37717  | -511.37666  | 87.7  | 59.1  | 58    |
|                                                         | -11.40      | -11.61      | -10.36      | -9.51       | -10.56      | -4.1  | -7.0  | -3.6  |
| H <sub>2</sub> O 298.15K B3LYP+IDSCRF/DZVP              |             |             |             |             |             |       |       |       |
| <b>1da</b>                                              | -1179.37909 | -1179.16898 | -1179.23100 | -1179.21921 | -1179.21511 | 130.5 | 105.7 | 97.1  |
| <b>2e</b>                                               | -361.37028  | -361.26415  | -361.30545  | -361.29448  | -361.29390  | 86.9  | 63.8  | 62.6  |
| <b>TS1<sub>dae</sub></b>                                | -1540.74549 | -1540.42841 | -1540.51076 | -1540.49979 | -1540.49307 | 173.3 | 150.2 | 136.1 |
|                                                         | 2.43        | 2.96        | 16.12       | 8.72        | 10.00       | -44.1 | -19.3 | -23.6 |
| <b>IN1<sub>dae</sub></b>                                | -1540.75323 | -1540.43480 | -1540.51579 | -1540.50470 | -1540.49885 | 170.5 | 147.1 | 134.8 |
|                                                         | -2.42       | -1.05       | 12.96       | 5.64        | 6.38        | -47.0 | -22.4 | -24.9 |
| <b>TS2<sub>dae</sub></b>                                | -1540.74599 | -1540.42926 | -1540.51176 | -1540.50065 | -1540.49385 | 173.6 | 150.3 | 135.9 |
|                                                         | 2.12        | 2.43        | 15.49       | 8.18        | 9.51        | -43.8 | -19.3 | -23.7 |
| <b>P<sub>dae</sub></b>                                  | -1029.17192 | -1028.95829 | -1029.01907 | -1029.00865 | -1029.00535 | 127.9 | 106.0 | 99.0  |
| <b>4-NO<sub>2</sub>-PhO<sup>•</sup></b>                 | -511.59947  | -511.49705  | -511.53868  | -511.52545  | -511.52504  | 87.6  | 59.8  | 58.9  |
|                                                         | -13.82      | -13.94      | -13.37      | -12.81      | -13.42      | -1.9  | -3.8  | -1.7  |
| H <sub>2</sub> O 298.15K M062x+IDSCRF/DZVP              |             |             |             |             |             |       |       |       |
| <b>1da</b>                                              | -1179.00884 | -1178.79616 | -1178.85804 | -1178.84613 | -1178.84194 | 130.2 | 105.2 | 96.3  |
| <b>2d</b>                                               | -361.20192  | -361.09455  | -361.13691  | -361.12605  | -361.12488  | 89.2  | 66.3  | 63.8  |
| <b>TS1<sub>dae</sub></b>                                | -1540.21670 | -1539.89576 | -1539.97732 | -1539.96634 | -1539.96010 | 171.7 | 148.6 | 135.4 |
|                                                         | -3.73       | -3.17       | 11.06       | 3.66        | 4.22        | -47.7 | -22.9 | -24.7 |
| <b>IN1<sub>dae</sub></b>                                | -1540.23767 | -1539.91465 | -1539.99591 | -1539.98490 | -1539.97855 | 171.0 | 147.9 | 134.5 |
|                                                         | -16.89      | -15.02      | -0.60       | -7.98       | -7.36       | -48.4 | -23.6 | -25.7 |
| <b>TS2<sub>dae</sub></b>                                | -1540.22554 | -1539.90459 | -1539.98533 | -1539.97406 | -1539.96800 | 169.9 | 146.2 | 133.5 |
|                                                         | -9.27       | -8.71       | 6.04        | -1.18       | -0.74       | -49.4 | -25.2 | -26.7 |
| <b>P<sub>dae</sub></b>                                  | -1028.85473 | -1028.63846 | -1028.69913 | -1028.68854 | -1028.68515 | 127.7 | 105.4 | 98.3  |
| <b>4-NO<sub>2</sub>-PhO<sup>•</sup></b>                 | -511.37692  | -511.27318  | -511.31469  | -511.30134  | -511.30094  | 87.4  | 59.3  | 58.4  |
|                                                         | -13.11      | -13.13      | -11.84      | -11.11      | -12.04      | -4.3  | -6.8  | -3.4  |
| H <sub>2</sub> O 298.15K ωB97x+IDSCRF/DZVP              |             |             |             |             |             |       |       |       |

|                                             |             |             |             |             |             |       |       |       |
|---------------------------------------------|-------------|-------------|-------------|-------------|-------------|-------|-------|-------|
| <b>1da</b>                                  | -1179.12523 | -1178.91154 | -1178.97344 | -1178.96161 | -1178.95735 | 130.3 | 105.4 | 96.4  |
| <b>2e</b>                                   | -361.25951  | -361.15181  | -361.19391  | -361.18302  | -361.18190  | 88.6  | 65.7  | 63.3  |
| <b>TS1<sub>dae</sub></b>                    | -1540.38804 | -1540.06592 | -1540.14841 | -1540.13730 | -1540.13035 | 173.6 | 150.2 | 135.6 |
|                                             | -2.07       | -1.61       | 11.89       | 4.60        | 5.58        | -45.2 | -20.8 | -24.1 |
| <b>IN1<sub>dae</sub></b>                    | -1540.40722 | -1540.08303 | -1540.16329 | -1540.15223 | -1540.14635 | 168.9 | 145.6 | 133.3 |
|                                             | -14.11      | -12.35      | 2.55        | -4.77       | -4.46       | -49.9 | -25.4 | -26.5 |
| <b>TS2<sub>dae</sub></b>                    | -1540.39256 | -1540.07052 | -1540.15131 | -1540.14018 | -1540.13402 | 170.0 | 146.6 | 133.6 |
|                                             | -4.91       | -4.50       | 10.07       | 2.79        | 3.28        | -48.8 | -24.4 | -26.1 |
| <b>P<sub>dae</sub></b>                      | -1028.95818 | -1028.74108 | -1028.80202 | -1028.79135 | -1028.78777 | 128.3 | 105.8 | 98.3  |
| <b>4-NO<sub>2</sub>-PhO<sup>•</sup></b>     | -511.44527  | -511.34115  | -511.38266  | -511.36875  | -511.36831  | 87.4  | 58.1  | 57.2  |
|                                             | -11.74      | -11.85      | -10.87      | -9.71       | -10.54      | -3.2  | -7.2  | -4.2  |
| H <sub>2</sub> O 298.15K ωB97xD+IDSCRF/DZVP |             |             |             |             |             |       |       |       |
| <b>1da</b>                                  | -1179.07288 | -1178.85991 | -1178.92184 | -1178.90994 | -1178.90572 | 130.4 | 105.3 | 96.4  |
| <b>2e</b>                                   | -361.23685  | -361.12957  | -361.17287  | -361.16187  | -361.16020  | 91.1  | 68.0  | 64.4  |
| <b>TS1<sub>dae</sub></b>                    | -1540.31436 | -1539.99330 | -1540.07514 | -1540.06400 | -1540.05755 | 172.2 | 148.8 | 135.2 |
|                                             | -2.91       | -2.40       | 12.28       | 4.90        | 5.25        | -49.2 | -24.5 | -25.6 |
| <b>IN1<sub>dae</sub></b>                    | -1540.33106 | -1540.00790 | -1540.08848 | -1540.07750 | -1540.07154 | 169.6 | 146.5 | 133.9 |
|                                             | -13.38      | -11.56      | 3.91        | -3.57       | -3.53       | -51.9 | -26.8 | -26.9 |
| <b>TS2<sub>dae</sub></b>                    | -1540.31909 | -1539.99814 | -1540.07909 | -1540.06801 | -1540.06184 | 170.4 | 147.0 | 134.1 |
|                                             | -5.87       | -5.43       | 9.80        | 2.38        | 2.56        | -51.1 | -26.2 | -26.8 |
| <b>P<sub>dae</sub></b>                      | -1028.91978 | -1028.70342 | -1028.76441 | -1028.75383 | -1028.75024 | 128.4 | 106.1 | 98.5  |
| <b>4-NO<sub>2</sub>-PhO<sup>•</sup></b>     | -511.40899  | -511.3052   | -511.34677  | -511.33326  | -511.3328   | 87.5  | 59.1  | 58.1  |
|                                             | -11.95      | -12.01      | -10.33      | -9.59       | -10.74      | -5.6  | -8.1  | -4.2  |
| H <sub>2</sub> O 298.15K B2PLYP+IDSCRF/DZVP |             |             |             |             |             |       |       |       |
| <b>1da</b>                                  | -1177.55797 | –           | –           | –           | –           | –     | –     | –     |
| <b>2e</b>                                   | -360.624629 | –           | –           | –           | –           | –     | –     | –     |
| <b>TS1<sub>dae</sub></b>                    | -1538.17435 | –           | –           | –           | –           | –     | –     | –     |
|                                             | 5.18        | –           | –           | –           | –           | –     | –     | –     |
